# Supplementary material
Source: publisher site journal article supplement (https://www.dovepress.com/article/575861)
Supplement: Supplementary file 1 [file 575861%20Supplementary%20Material%20for%20corrections_1%20CLEAN.docx]

**SUPPLEMENTAL MATERIALS**

**
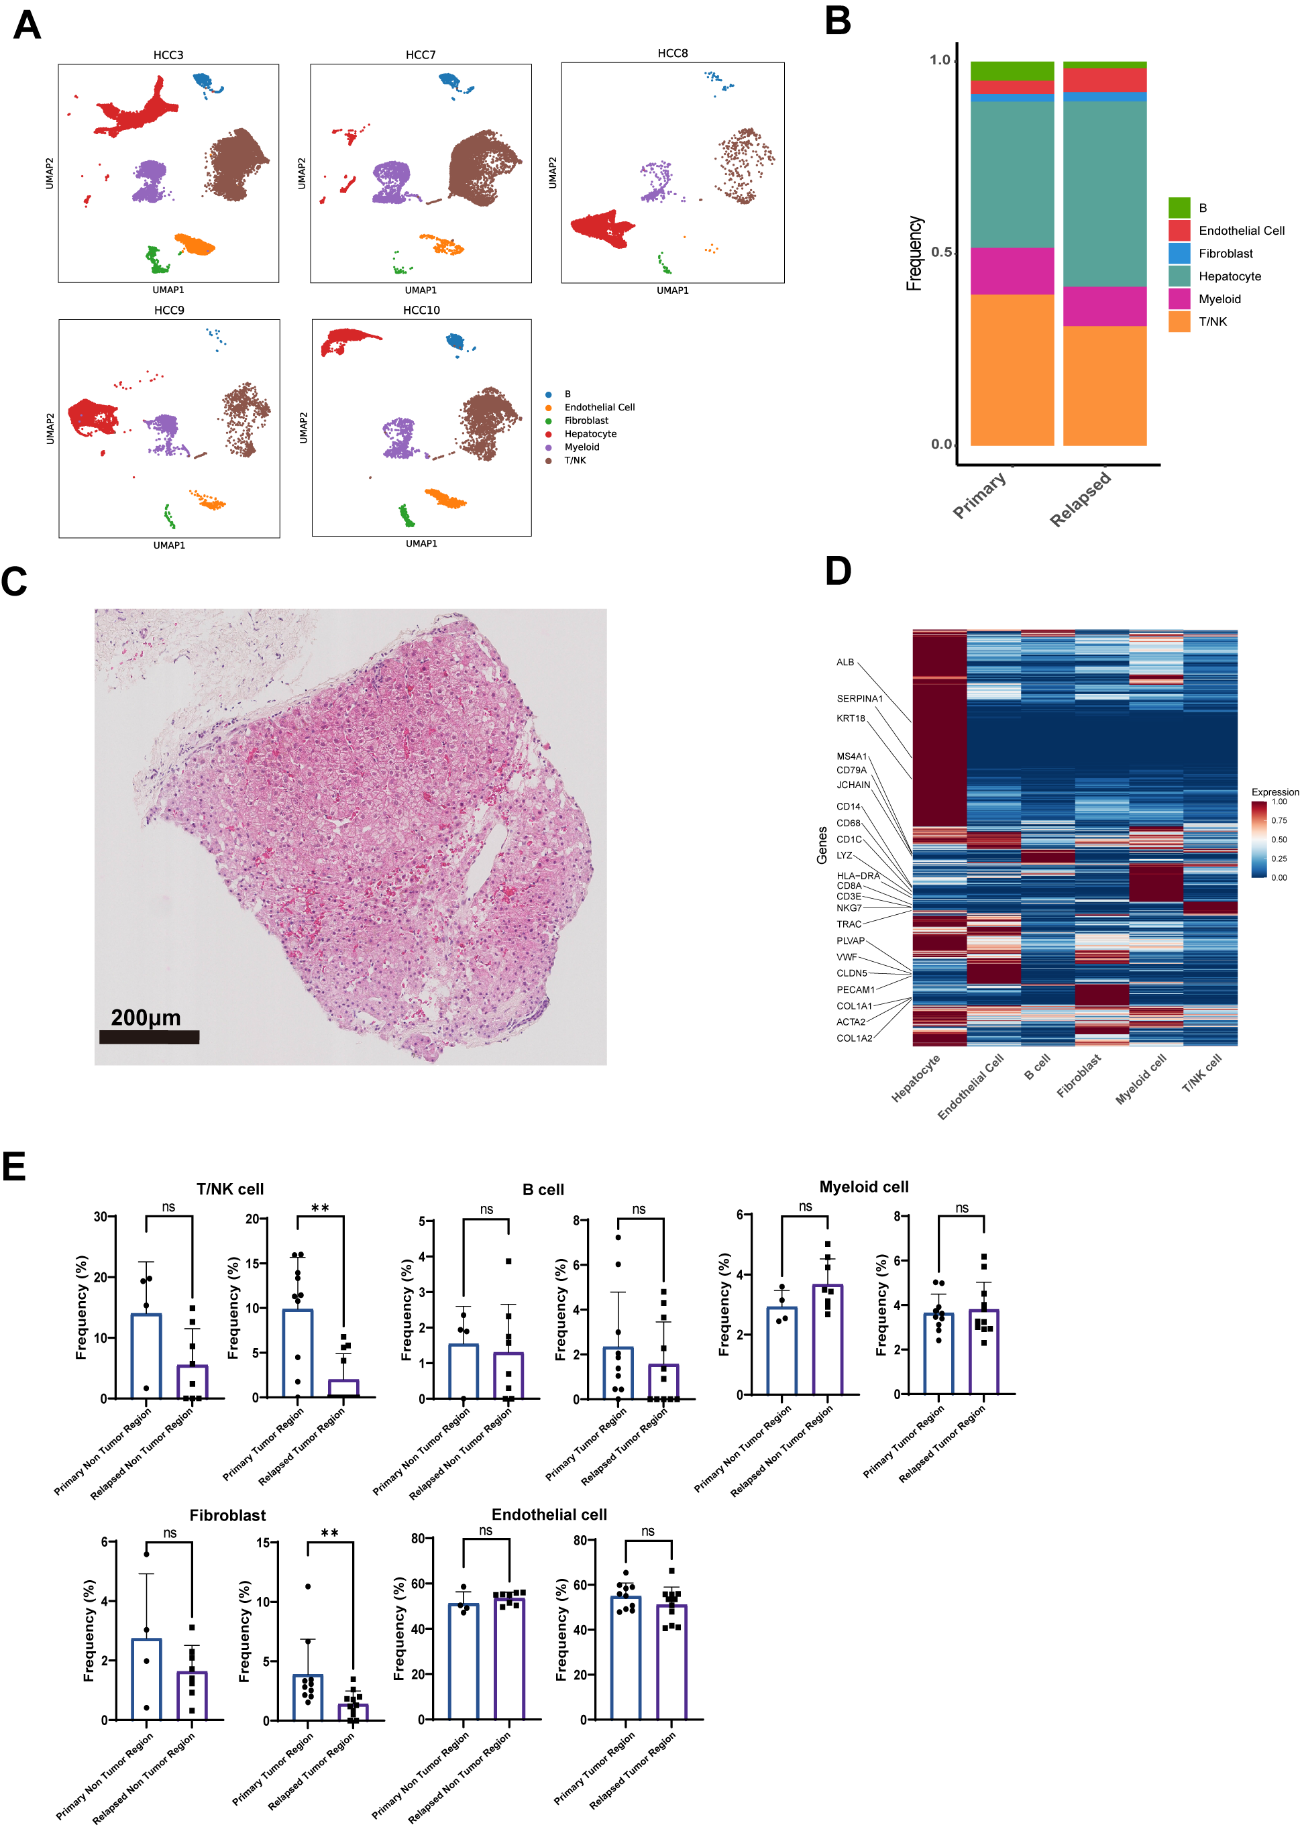
**

**Supplementary Figure 1.**Uniform Manifold Approximation and Projection (UMAP) visualization of scRNA-seq data, shown separately for each individual patient after quality control and Harmony-based batch correction, with cells colored by annotated major cell types. (A). Proportional composition of major cell types derived from scRNA-seq data in primary and relapsed HCC groups (B). Representative hematoxylin and eosin (H&E)–stained image of HCC tissue, illustrating tumor and adjacent non-tumor regions used for GeoMx spatial transcriptomics analysis. (C). Heatmap displaying the expression of canonical marker genes used as reference signatures for cell-type deconvolution of spatial transcriptomics data. (D). Bar plot showing estimated cell-type proportions derived from GeoMx spatial transcriptomics deconvolution, stratified by tumor status and tissue location. Statistical significance was assessed using Mann–Whitney U test. (E). **P ≤ 0.01.

**Abbreviation**: ns, no significance.

**
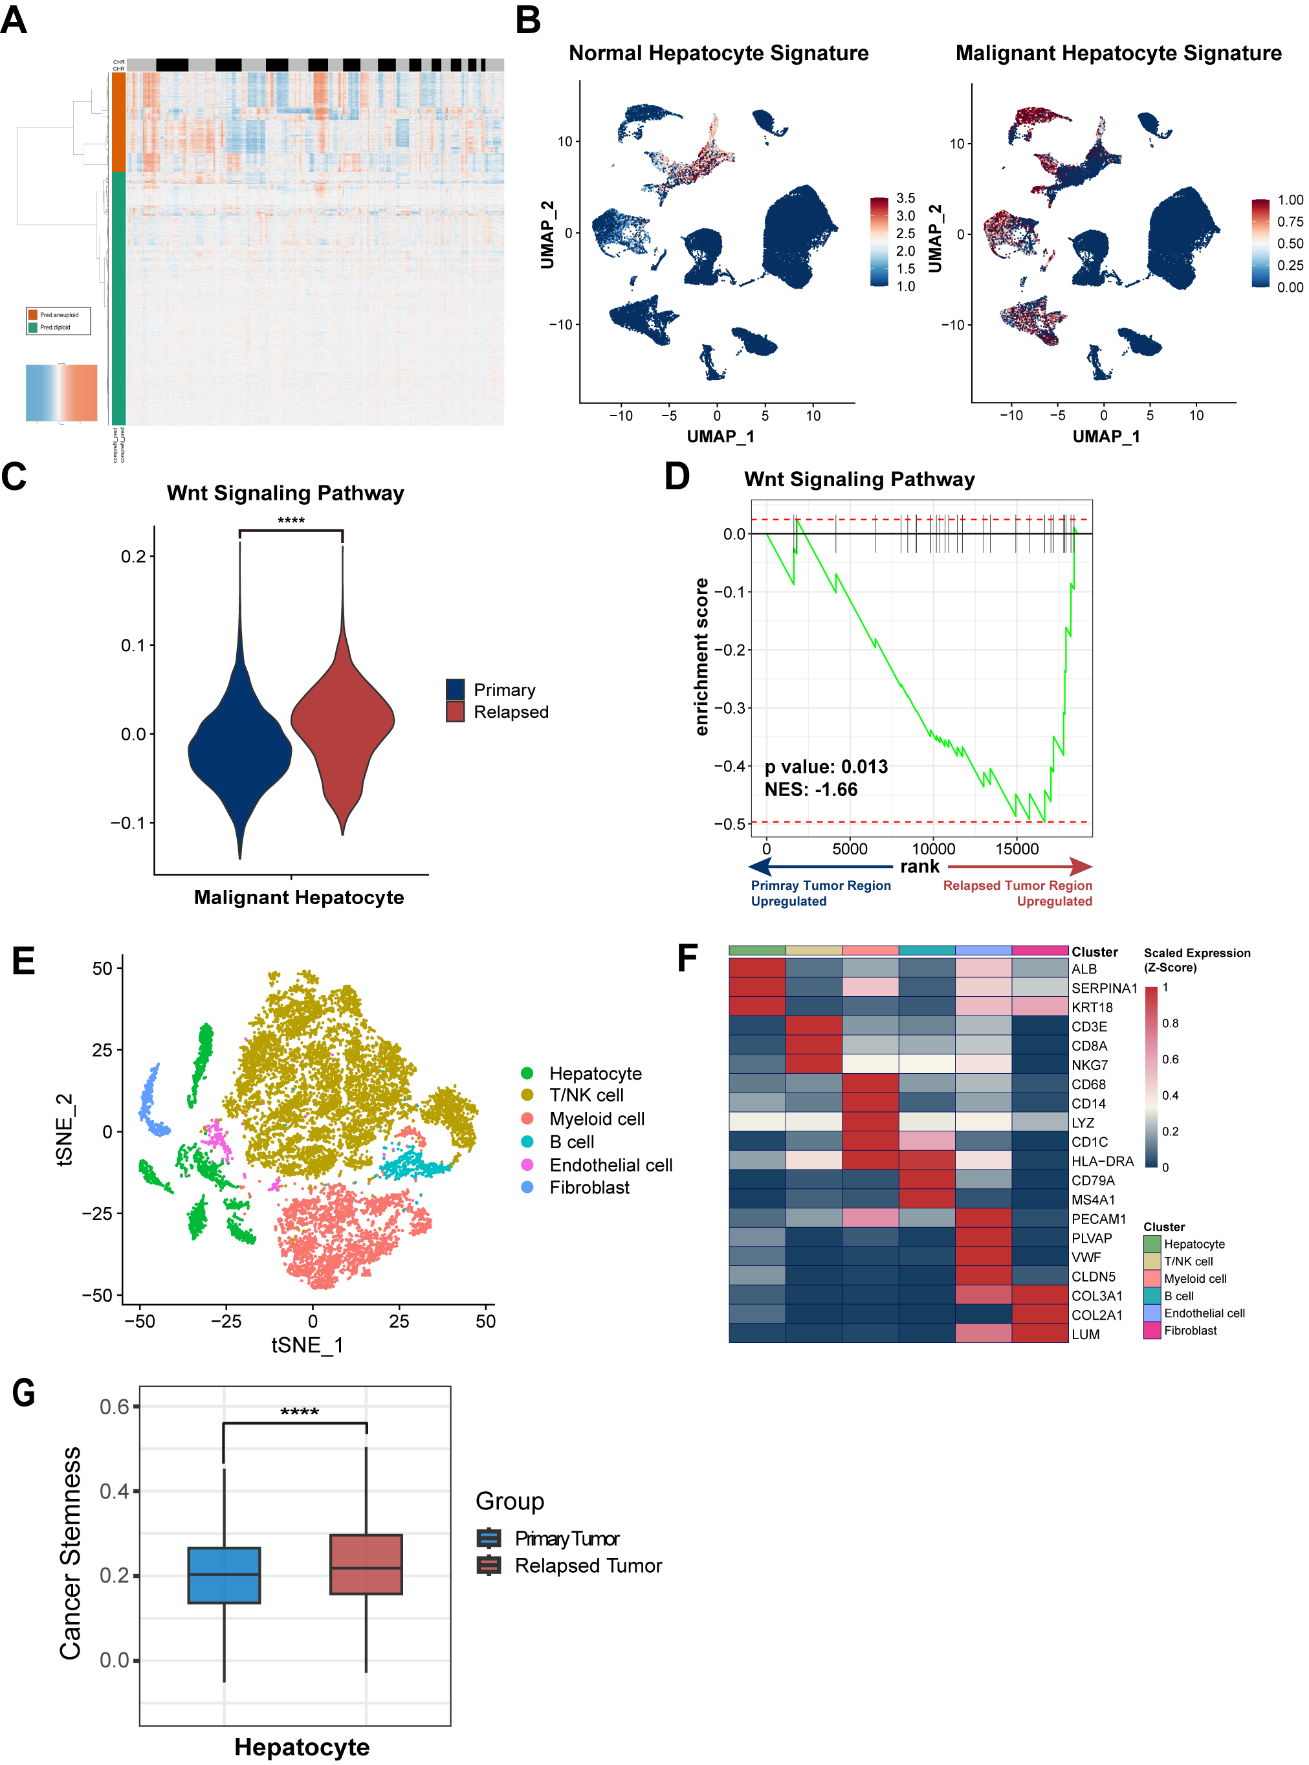
**

**Supplementary Figure 2.**Copy number variation (CNV) heatmap inferred using CopyKat, showing chromosomal alterations across individual cells to distinguish malignant from non-malignant hepatocytes. (A). Feature plots showing normal hepatocyte and malignant hepatocyte gene signature scores projected onto the UMAP embedding of total cells. (B). Violin plot comparing Wnt signaling pathway activity in malignant hepatocytes between primary and relapsed tumors, based on MSigDB gene sets; P values were calculated using an unpaired t-test after normality assessment. (C). Gene set enrichment analysis (GSEA) in spatial transcriptomic data highlighting upregulation of the Wnt signaling pathway in relapsed tumor regions compared with primary tumors. (D). UMAP visualization of an independent public scRNA-seq HCC dataset (Sun et al., 2021), with cells colored by major cell types. (E). Heatmap showing the canonical marker gene expression across major cell types in the public scRNA-seq data (Sun et al., 2021) (F). Box plot showing cancer stemness scores in hepatocytes between primary and relapsed tumors in the public scRNA-seq data (Sun et al., 2021). The p value was calculated using an unpaired t-test (G). ****P ≤ 0.0001.

**
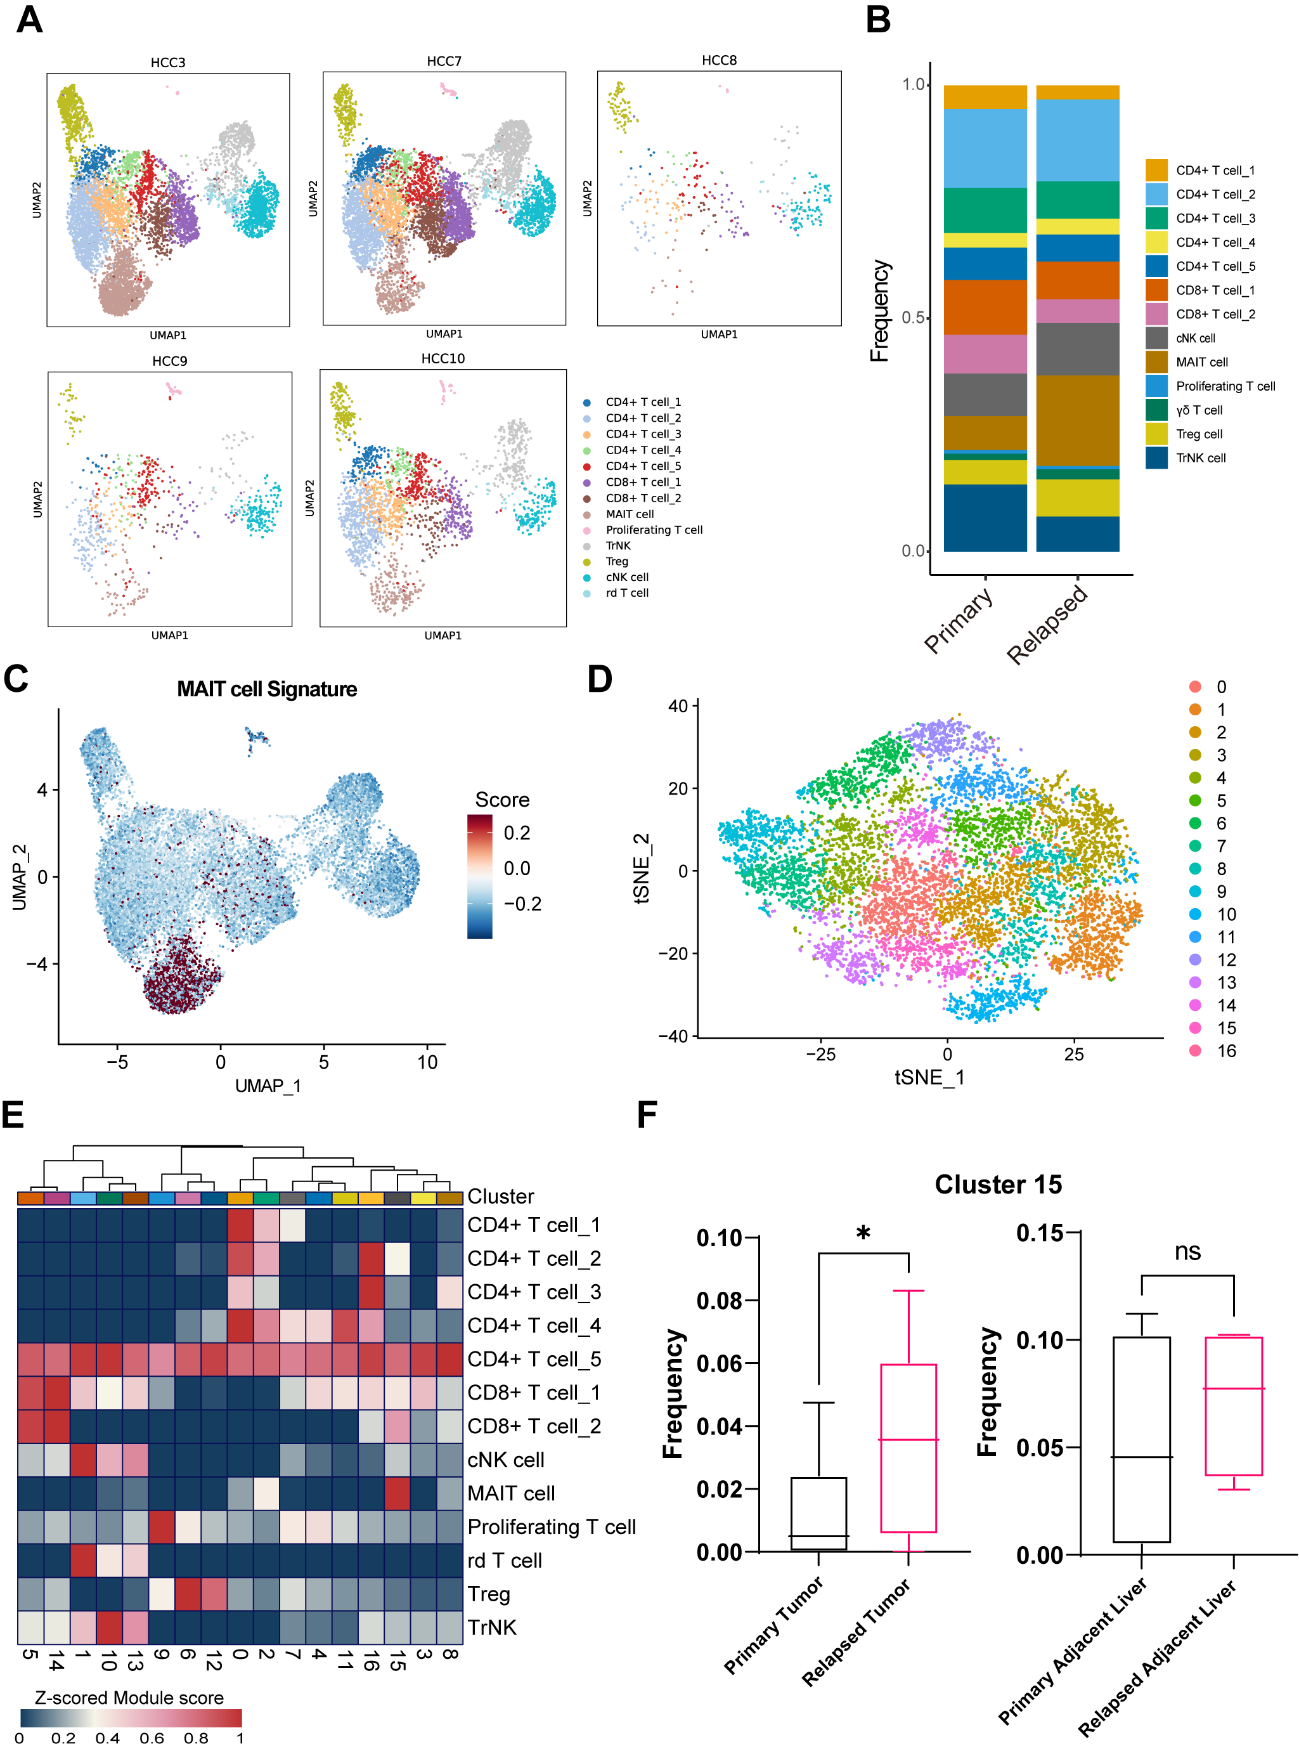
**

**Supplementary Figure 3.**UMAP plot of scRNA-seq data from individual patients, with cells colored according to T/NK subsets identified by unsupervised subclustering (A). Population ratio of TNK subsets in scRNA-seq for primary and relapsed HCC groups (B). UMAP projection showing MAIT cell signature gene set scores across T/NK subsets in the scRNA-seq dataset. (C). UMAP plot of public scRNA-seq data from 18 patients (Sun et al., 2021), with cells colored according to T/NK subsets (D). Heatmap showing the expression of signature gene sets for each T/NK subsets identified from in our cohorts across T/NK subsets in the public scRNA-seq data (Sun et al., 2021) (E). Box plot showing the frequency of cluster 15 between tumor group and tissue location in the public scRNA-seq data (Sun et al., 2021) (F). *P ≤ 0.05.

**Abbreviation**: ns, no significance.

**
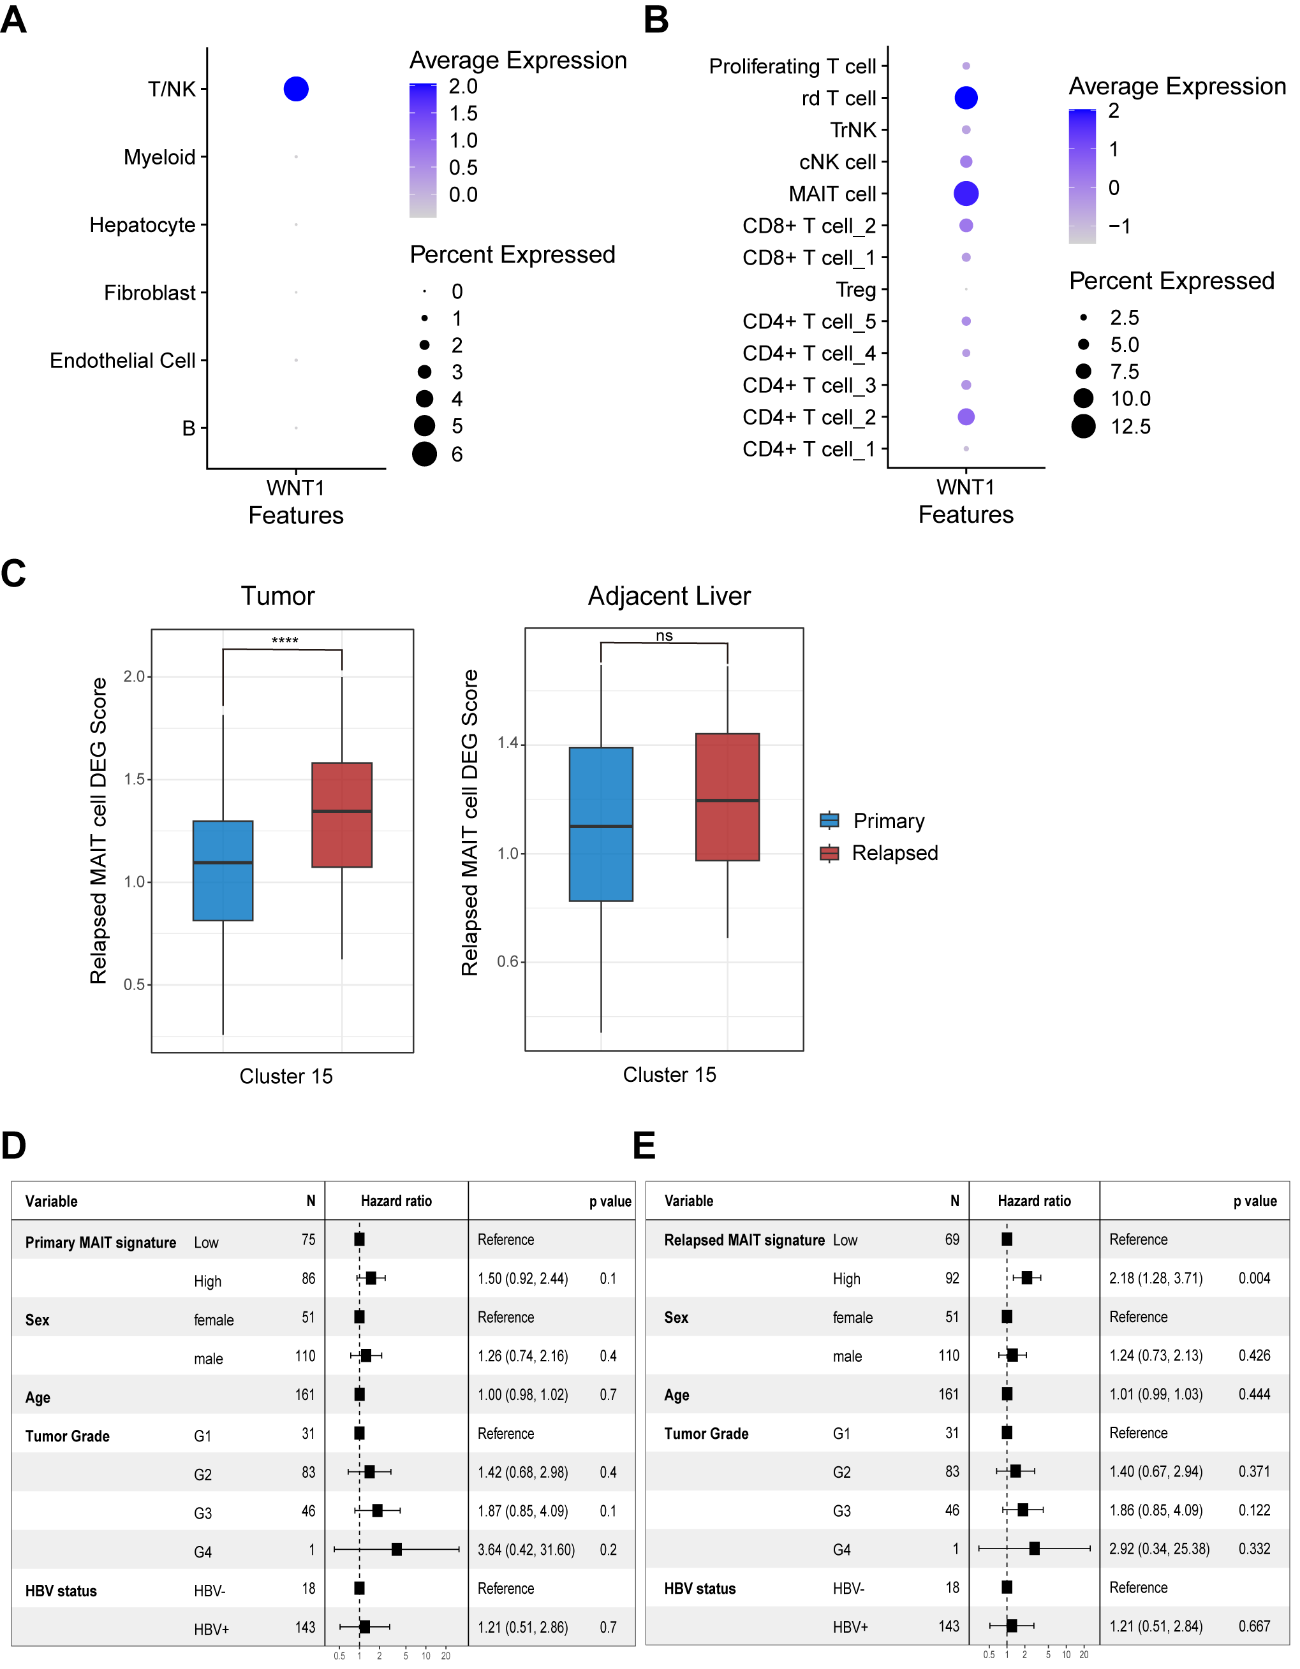
**

**Supplementary Figure 4.**Dot plot showing WNT1 gene expression among major cell types (A) and T/NK subsets (B) in the scRNA-seq dataset. Box plot showing gene signature scores based on genes upregulated in relapsed MAIT cells compared with primary MAIT cells in our cohort, calculated in cluster 15 (MAIT cells) within the T/NK cell population of the public scRNA-seq dataset (Sun et al., 2021). The p value was calculated using an unpaired t-test (C). Multivariate Cox proportional hazards analyses evaluating the prognostic impact of primary MAIT cell signatures (D) and relapsed MAIT cell signatures (E), adjusted for age, sex, tumor grade, and HBV status. (E). ****P ≤ 0.0001.

**Abbreviation**: ns, no significance.

**Supplementary Table 1** Proportions of major cell types per donor identified by scRNA-seq

| **Sample** | **HCC Type** | **Hepatocyte (n, %)** | **T/NK (n, %)** | **Myeloid (n, %)** | **B (n, %)** | **Fibroblast (n, %)** | **Endothelial (n, %)** |
| --- | --- | --- | --- | --- | --- | --- | --- |
| HCC3 | Relapsed | 6122 (35.65) | 7022 (40.89) | 1636 (9.53) | 425 (2.47) | 566  (3.30) | 1403  (8.17) |
| HCC7 | Primary | 785  (7.72) | 6838 (67.23) | 1810 (17.80) | 467 (4.59) | 35  (0.34) | 236  (2.32) |
| HCC8 | Primary | 5320 (88.11) | 371 (6.14) | 272 (4.50) | 33 (0.55) | 35  (0.58) | 7  (0.12) |
| HCC9 | Relapsed | 5948 (75.79) | 766 (9.76) | 930 (11.85) | 14 (0.18) | 42  (0.54) | 148  (1.89) |
| HCC10 | Primary | 3110 (38.88) | 2315 (28.94) | 860 (10.75) | 710 (8.88) | 414  (5.18) | 589  (7.36) |

**Supplementary Table 2** Estimated proportions of major cell types for each ROI based on deconvolution analysis of spatial transcriptomics data

| **Sample** | **HCC Type** | **Region** | **Hepatocyte (%)** | **Endothelial (%)** | **B**  **(%)** | **Fibroblast (%)** | **Myeloid (%)** | **T/NK  (%)** |
| --- | --- | --- | --- | --- | --- | --- | --- | --- |
| HCC03_01 | Relapsed | Tumor | 35.98 | 50.92 | 4.30 | 2.62 | 6.18 | 0.00 |
| HCC03_02 | Relapsed | Non Tumor | 38.84 | 55.22 | 0.30 | 1.40 | 4.24 | 0.00 |
| HCC03_03 | Relapsed | Tumor | 55.88 | 41.11 | 0.00 | 0.00 | 3.01 | 0.00 |
| HCC03_04 | Relapsed | Non Tumor | 33.31 | 54.88 | 3.86 | 2.09 | 3.43 | 2.42 |
| HCC03_05 | Relapsed | Tumor | 32.22 | 53.55 | 3.66 | 1.83 | 2.93 | 5.81 |
| HCC03_06 | Relapsed | Non Tumor | 43.14 | 51.52 | 0.00 | 0.32 | 5.02 | 0.00 |
| HCC03_07 | Relapsed | Tumor | 51.97 | 41.78 | 0.00 | 0.52 | 5.73 | 0.00 |
| HCC03_08 | Relapsed | Tumor | 35.39 | 55.82 | 2.27 | 2.00 | 4.51 | 0.00 |
| HCC03_09 | Relapsed | Tumor | 46.82 | 48.07 | 0.00 | 1.30 | 3.81 | 0.00 |
| HCC03_10 | Relapsed | Non Tumor | 44.88 | 49.62 | 0.00 | 0.92 | 4.58 | 0.00 |
| HCC03_11 | Relapsed | Tumor | 30.03 | 53.56 | 4.80 | 3.48 | 4.01 | 4.11 |
| HCC03_12 | Relapsed | Ambiguous | 46.25 | 48.85 | 0.00 | 0.64 | 4.26 | 0.00 |
| HCC10_01 | Primary | Tumor | 32.15 | 58.44 | 0.45 | 3.46 | 3.74 | 1.76 |
| HCC10_02 | Primary | Non Tumor | 22.69 | 47.17 | 2.35 | 5.57 | 2.45 | 19.77 |
| HCC10_03 | Primary | Tumor | 29.24 | 49.24 | 3.00 | 2.16 | 2.41 | 13.94 |
| HCC10_04 | Primary | Non Tumor | 27.79 | 50.40 | 1.94 | 1.98 | 2.54 | 15.35 |
| HCC09_01 | Relapsed | Non Tumor | 33.50 | 55.93 | 0.70 | 1.23 | 2.93 | 5.72 |
| HCC09_02 | Relapsed | Non Tumor | 28.68 | 50.33 | 1.74 | 1.71 | 2.68 | 14.85 |
| HCC09_03 | Relapsed | Non Tumor | 24.22 | 54.98 | 1.57 | 3.11 | 3.49 | 12.62 |
| HCC09_04 | Relapsed | Non Tumor | 27.65 | 56.01 | 2.32 | 2.29 | 3.11 | 8.62 |
| HCC09_05 | Relapsed | Ambiguous | 30.04 | 53.66 | 1.60 | 1.66 | 2.69 | 10.35 |
| HCC09_06 | Relapsed | Tumor | 33.59 | 55.79 | 0.91 | 0.86 | 3.26 | 5.59 |
| HCC09_07 | Relapsed | Tumor | 29.63 | 66.24 | 0.00 | 1.20 | 2.92 | 0.00 |
| HCC09_11 | Relapsed | Tumor | 56.97 | 40.73 | 0.00 | 0.00 | 2.30 | 0.00 |
| HCC08_01 | Primary | Tumor | 17.72 | 48.52 | 6.03 | 11.30 | 4.98 | 11.44 |
| HCC08_02 | Primary | Tumor | 19.85 | 47.89 | 7.23 | 6.66 | 5.02 | 13.34 |
| HCC07_01 | Primary | Tumor | 25.65 | 56.00 | 1.38 | 2.54 | 3.12 | 11.31 |
| HCC07_02 | Primary | Tumor | 23.44 | 59.05 | 1.04 | 2.83 | 2.86 | 10.77 |
| HCC07_03 | Primary | Tumor | 29.39 | 65.45 | 0.00 | 1.54 | 3.62 | 0.00 |
| HCC07_04 | Primary | Tumor | 20.21 | 55.08 | 2.05 | 3.34 | 3.39 | 15.93 |
| HCC07_05 | Primary | Tumor | 24.84 | 50.76 | 1.86 | 3.08 | 3.46 | 16.00 |
| HCC07_06 | Primary | Tumor | 29.24 | 59.89 | 0.44 | 2.03 | 3.91 | 4.49 |
| HCC07_07 | Primary | Non Tumor | 36.20 | 58.56 | 0.00 | 0.41 | 3.15 | 1.69 |
| HCC07_08 | Primary | Non Tumor | 23.00 | 49.15 | 1.90 | 3.03 | 3.60 | 19.33 |
| HCC09_12 | Relapsed | Tumor | 30.90 | 55.95 | 1.36 | 1.78 | 3.23 | 6.77 |

**Supplementary Table 3** Hepatocyte enrichment score for each ROI in spatial transcriptomics data

| **Sample** | **HCC Type** | **Region** | **Normal Hepatocyte** | **Malignant Hepatocyte** |
| --- | --- | --- | --- | --- |
| HCC03_01 | Relapsed | Tumor | 68.33 | 26.81 |
| HCC03_03 | Relapsed | Tumor | 70.50 | 30.09 |
| HCC03_05 | Relapsed | Tumor | 71.67 | 30.33 |
| HCC03_07 | Relapsed | Tumor | 68.55 | 28.40 |
| HCC03_08 | Relapsed | Tumor | 64.02 | 28.22 |
| HCC03_09 | Relapsed | Tumor | 67.54 | 28.27 |
| HCC03_11 | Relapsed | Tumor | 64.53 | 26.47 |
| HCC10_01 | Primary | Tumor | 54.01 | 27.34 |
| HCC10_03 | Primary | Tumor | 52.74 | 29.81 |
| HCC09_06 | Relapsed | Tumor | 66.38 | 37.72 |
| HCC09_07 | Relapsed | Tumor | 64.86 | 26.82 |
| HCC09_11 | Relapsed | Tumor | 63.38 | 26.51 |
| HCC08_01 | Primary | Tumor | 67.77 | 26.60 |
| HCC08_02 | Primary | Tumor | 66.92 | 27.73 |
| HCC07_01 | Primary | Tumor | 63.98 | 26.60 |
| HCC07_02 | Primary | Tumor | 64.92 | 26.52 |
| HCC07_03 | Primary | Tumor | 62.93 | 25.74 |
| HCC07_04 | Primary | Tumor | 64.15 | 24.69 |
| HCC07_05 | Primary | Tumor | 66.33 | 27.24 |
| HCC07_06 | Primary | Tumor | 63.29 | 26.27 |
| HCC09_12 | Relapsed | Tumor | 61.12 | 35.95 |

**Supplementary Table 4** Cancer stemness gene set from CancerSEA database

| AFMID | AFP | ANPEP | APC | AQP1 | ASCL1 | ASCL2 |
| --- | --- | --- | --- | --- | --- | --- |
| AXIN2 | AZGP1 | BAZ2B | BMI1 | BOC | C6orf62 | CA2 |
| CAMK2N1 | CCL5 | CCND2 | CD200 | CD24 | CD33 | CD38 |
| CD44 | CDCA7 | CDK6 | CEBPA | CFTR | CHD7 | CORO1C |
| CXCL2 | DBX1 | DBX2 | DNMT3A | DPP4 | EBF1 | EEF1A1 |
| EGFR | EIF4B | EMX1 | EMX2 | ENG | EPHB2 | ETS2 |
| ETV1 | EVI2A | EZH2 | FABP7 | FAM84A | FBLIM1 | FBXO27 |
| FERMT1 | FOXA2 | FOXA3 | FOXG1 | GATA1 | GATA2 | GATA3 |
| GATA4 | GFAP | GFI1 | GLI1 | GPC3 | GPM6A | GPSM2 |
| GPX2 | H19 | H3F3B | HACD3 | HAPLN1 | HEPN1 | HES1 |
| HNRNPH1 | HNRNPL | HOPX | ICAM1 | IDH1 | IKZF1 | IRX3 |
| ITGAM | KDR | KIT | KLK10 | KRT14 | LATS2 | LGR5 |
| LOH12CR2 | LRIG1 | LY6D | LYZ | MALAT1 | MBOAT1 | MESP1 |
| MESP2 | METTL3 | MLLT10 | MME | MYB | MYC | NANOG |
| NCAM1 | NEK5 | NELL2 | NFE2 | NFIA | NFIB | NKX2-5 |
| NODAL | NT5E | OLFM4 | OPHN1 | ORC6 | PABPC1 | PAX6 |
| POU5F1 | PROM1 | PTK7 | PTMA | PTPRC | PTPRG | PTPRO |
| PTPRS | PTPRZ1 | QPCTL | RAB42 | RAMP2-AS1 | RBM6 | RGMB |
| RNF43 | RUNX1 | SET | SLC12A2 | SMAD2 | SMOC2 | SOX1 |
| SOX11 | SOX17 | SOX2 | SOX3 | SOX4 | SOX9 | SPDYE1 |
| SPDYE5 | SPHKAP | SRGAP2C | STMN1 | STMN2 | TAL1 | TATDN3 |
| TCF12 | TCF4 | TDGF1 | TFDP2 | TFRC | THY1 | TNFAIP8L1 |
| TOX3 | TRA2A | TSPAN6 | UGT8 | VEGFA | ZBTB8A | ZNF793 |
| ABCG2 | ALDH1A1 | ALDH1A3 | DNER | MET |  |  |

**Supplementary Table 5** Wnt signaling pathway gene set from MSigDB (M77)

| FZD9 | WNT7A | FZD6 | FZD7 | LRP5 | LRP6 | ATP6AP2 |
| --- | --- | --- | --- | --- | --- | --- |
| DKK1 | WNT1 | WNT2 | IGFBP4 | RTK | WNT5A | WNT3 |
| WNT3A | WNT7B | ROR2 | FZD5 | FZD2 | RSPO1 | KREMEN2 |
| CTHRC1 | KREMEN1 | FZD8 | FZD4 | FZD10 | FZD1 | WIF1 |

**Supplementary Table 6** Proportions of major cell types per donor in public scRNA-seq data (Sun et al., 2021).1

| **Patient** | **Tissue Source** | **HCC Type** | **Hepatocyte (%)** | **T/NK  (%)** | **Myeloid (%)** | **B**  **(%)** | **Endothelial (%)** | **Fibroblast (%)** |
| --- | --- | --- | --- | --- | --- | --- | --- | --- |
| P01 | Tumor | Relapsed | 67.20 | 13.40 | 16.00 | 0.00 | 3.40 | 0.00 |
| P02 | Adjacent liver | Relapsed | 0.00 | 84.50 | 8.60 | 1.70 | 5.20 | 0.00 |
| P02 | Tumor | Relapsed | 7.80 | 71.30 | 17.80 | 2.20 | 0.90 | 0.00 |
| P03 | Adjacent liver | Relapsed | 0.00 | 70.40 | 25.60 | 3.20 | 0.80 | 0.00 |
| P03 | Tumor | Relapsed | 1.50 | 80.20 | 10.20 | 3.80 | 4.40 | 0.00 |
| P04 | Adjacent liver | Relapsed | 0.00 | 78.10 | 10.70 | 10.70 | 0.50 | 0.00 |
| P04 | Tumor | Relapsed | 66.80 | 23.90 | 8.60 | 0.50 | 0.20 | 0.00 |
| P05 | Adjacent liver | Relapsed | 0.00 | 66.00 | 25.00 | 9.00 | 0.00 | 0.00 |
| P05 | Tumor | Relapsed | 42.60 | 21.50 | 28.50 | 1.40 | 6.00 | 0.00 |
| P07 | Tumor | Relapsed | 2.50 | 60.90 | 27.80 | 7.50 | 1.40 | 0.00 |
| P08 | Tumor | Primary | 1.50 | 59.70 | 27.10 | 3.40 | 8.30 | 0.00 |
| P09 | Adjacent liver | Primary | 0.00 | 86.30 | 11.30 | 1.60 | 0.80 | 0.00 |
| P09 | Tumor | Primary | 40.50 | 33.40 | 22.20 | 1.20 | 2.60 | 0.10 |
| P10 | Adjacent liver | Primary | 2.30 | 78.90 | 15.20 | 1.80 | 1.80 | 0.00 |
| P10 | Tumor | Primary | 23.20 | 39.90 | 34.20 | 2.20 | 0.40 | 0.00 |
| P11 | Tumor | Primary | 0.20 | 80.00 | 5.70 | 14.10 | 0.00 | 0.00 |
| P12 | Adjacent liver | Primary | 0.00 | 86.10 | 7.50 | 5.70 | 0.60 | 0.00 |
| P12 | Tumor | Primary | 6.70 | 42.10 | 45.10 | 5.60 | 0.50 | 0.00 |
| P13 | Tumor | Primary | 5.30 | 37.00 | 57.10 | 0.00 | 0.60 | 0.00 |
| P14 | Tumor | Primary | 1.90 | 90.70 | 5.30 | 1.90 | 0.20 | 0.00 |
| P15 | Adjacent liver | Primary | 0.00 | 77.50 | 17.60 | 4.20 | 0.70 | 0.00 |
| P15 | Tumor | Primary | 1.70 | 63.80 | 31.00 | 2.80 | 0.70 | 0.00 |
| P16 | Adjacent liver | Primary | 0.00 | 89.00 | 2.90 | 6.90 | 1.20 | 0.00 |
| P16 | Tumor | Primary | 0.00 | 23.80 | 34.60 | 0.70 | 0.10 | 40.80 |
| P17 | Adjacent liver | Primary | 0.40 | 74.60 | 12.90 | 10.90 | 1.20 | 0.00 |
| P17 | Tumor | Primary | 14.10 | 63.00 | 15.60 | 2.20 | 5.20 | 0.00 |
| P18 | Adjacent liver | Primary | 0.40 | 81.90 | 8.00 | 9.70 | 0.00 | 0.00 |
| P18 | Tumor | Primary | 18.70 | 70.40 | 7.50 | 2.00 | 1.40 | 0.00 |
| P19 | Adjacent liver | Primary | 0.00 | 94.90 | 5.10 | 0.00 | 0.00 | 0.00 |
| P19 | Tumor | Primary | 37.00 | 50.00 | 12.00 | 0.00 | 0.90 | 0.00 |

**Supplementary Table 7** Proportions of T/NK subset per donor in scRNA-seq data

| **Sample** | **HCC Type** | **CD4+ T_1 (n, %)** | **CD4+ T_2 (n, %)** | **CD4+ T_3 (n, %)** | **CD4+ T_4 (n, %)** | **CD4+ T_5 (n, %)** | **Treg (n, %)** | **CD8+ T_1 (n, %)** | **CD8+ T_2 (n, %)** | **MAIT  (n, %)** | **cNK  (n, %)** | **TrNK (n, %)** | **γδ T  (n, %)** |
| --- | --- | --- | --- | --- | --- | --- | --- | --- | --- | --- | --- | --- | --- |
| HCC3 | Relapsed | 220 (3.13) | 1228 (17.49) | 576 (8.20) | 221 (3.15) | 330 (4.70) | 583 (8.30) | 591 (8.42) | 372 (5.30) | 1456 (20.73) | 730 (10.40) | 545 (7.76) | 162 (2.31) |
| HCC7 | Primary | 341 (4.99) | 1094 (16.00) | 602 (8.80) | 183 (2.68) | 407 (5.95) | 253 (3.70) | 912 (13.34) | 686 (10.03) | 486 (7.11) | 628 (9.18) | 1106 (16.17) | 100 (1.46) |
| HCC8 | Primary | 6 (1.62) | 27 (7.28) | 31 (8.36) | 11 (2.96) | 37 (9.97) | 77 (20.75) | 38 (10.24) | 18 (4.85) | 13 (3.50) | 79 (21.29) | 21 (5.66) | 9 (2.43) |
| HCC9 | Relapsed | 17 (2.22) | 141 (18.41) | 46 (6.01) | 43 (5.61) | 124 (16.19) | 37 (4.83) | 39 (5.09) | 20 (2.61) | 56 (7.31) | 150 (19.58) | 39 (5.09) | 8 (1.04) |
| HCC10 | Primary | 139 (6.00) | 490 (21.17) | 285 (12.31) | 109 (4.71) | 217 (9.37) | 173 (7.47) | 165 (7.13) | 92 (3.97) | 198 (8.55) | 160 (6.91) | 241 (10.41) | 17 (0.73) |

**Supplementary Table 8** MAIT cell signature gene set for scoring in spatial transcriptomic data

| TRAV1-2 | KLRB1 | SLC4A10 | NCR3 | TMIGD2 | CEBPD | IL4I1 |
| --- | --- | --- | --- | --- | --- | --- |
| ZBTB16 | JAML | CCL20 | LINC01871 |  |  |  |

**Supplementary Table 9** MAIT cell enrichment score for each ROI in spatial transcriptomic data between tumor and location groups

| **Sample** | **HCC Type** | **Region** | **MAIT cell scoring** |
| --- | --- | --- | --- |
| HCC03_01 | Relapsed | Tumor | 0.28 |
| HCC03_02 | Relapsed | Non Tumor | 0.16 |
| HCC03_03 | Relapsed | Tumor | 0.16 |
| HCC03_04 | Relapsed | Non Tumor | 0.19 |
| HCC03_05 | Relapsed | Tumor | 0.21 |
| HCC03_06 | Relapsed | Non Tumor | 0.19 |
| HCC03_07 | Relapsed | Tumor | 0.22 |
| HCC03_08 | Relapsed | Tumor | 0.20 |
| HCC03_09 | Relapsed | Tumor | 0.20 |
| HCC03_10 | Relapsed | Non Tumor | 0.24 |
| HCC03_11 | Relapsed | Tumor | 0.21 |
| HCC03_12 | Relapsed | Ambiguous | 0.24 |
| HCC10_01 | Primary | Tumor | 0.01 |
| HCC10_02 | Primary | Non Tumor | 0.03 |
| HCC10_03 | Primary | Tumor | 0.03 |
| HCC10_04 | Primary | Non Tumor | 0.01 |
| HCC09_01 | Relapsed | Non Tumor | 0.08 |
| HCC09_02 | Relapsed | Non Tumor | 0.09 |
| HCC09_03 | Relapsed | Non Tumor | 0.12 |
| HCC09_04 | Relapsed | Non Tumor | 0.07 |
| HCC09_05 | Relapsed | Ambiguous | 0.08 |
| HCC09_06 | Relapsed | Tumor | 0.03 |
| HCC09_07 | Relapsed | Tumor | 0.02 |
| HCC09_11 | Relapsed | Tumor | 0.06 |
| HCC08_01 | Primary | Tumor | 0.09 |
| HCC08_02 | Primary | Tumor | 0.11 |
| HCC07_01 | Primary | Tumor | 0.04 |
| HCC07_02 | Primary | Tumor | 0.04 |
| HCC07_03 | Primary | Tumor | 0.03 |
| HCC07_04 | Primary | Tumor | 0.06 |
| HCC07_05 | Primary | Tumor | 0.09 |
| HCC07_06 | Primary | Tumor | 0.05 |
| HCC07_07 | Primary | Non Tumor | 0.00 |
| HCC07_08 | Primary | Non Tumor | 0.00 |
| HCC09_12 | Relapsed | Tumor | 0.09 |

**Supplementary Table 10** Proportions of T/NK subset per donor in public scRNA-seq data (Sun et al., 2021).1

| P19 | P19 | P18 | P18 | P17 | P17 | P16 | P16 | P15 | P15 | P14 | P13 | P12 | P12 | P11 | P10 | P10 | P09 | P09 | P08 | P07 | P05 | P05 | P04 | P04 | P03 | P03 | P02 | P02 | P01 | **Patient** | |
| --- | --- | --- | --- | --- | --- | --- | --- | --- | --- | --- | --- | --- | --- | --- | --- | --- | --- | --- | --- | --- | --- | --- | --- | --- | --- | --- | --- | --- | --- | --- | --- |
| Adjacent liver | Tumor | Adjacent liver | Tumor | Adjacent liver | Tumor | Adjacent liver | Tumor | Adjacent liver | Tumor | Tumor | Tumor | Adjacent liver | Tumor | Tumor | Adjacent liver | Tumor | Adjacent liver | Tumor | Tumor | Tumor | Adjacent liver | Tumor | Adjacent liver | Tumor | Adjacent liver | Tumor | Adjacent liver | Tumor | Tumor | **Tissue Source** | |
| Primary | Primary | Primary | Primary | Primary | Primary | Primary | Primary | Primary | Primary | Primary | Primary | Primary | Primary | Primary | Primary | Primary | Primary | Primary | Primary | Relapsed | Relapsed | Relapsed | Relapsed | Relapsed | Relapsed | Relapsed | Relapsed | Relapsed | Relapsed | **HCC Type** | |
| 11 | 2 | 1 | 6 | 2 | 1 | 1 | 13 | 1 | 13 | 6 | 0 | 2 | 1 | 15 | 0 | 7 | 2 | 3 | 15 | 23 | 0 | 3 | 3 | 23 | 1 | 18 | 0 | 4 | 13 | **0** | **Subset Proportion (%)** |
| 5 | 0 | 7 | 8 | 10 | 2 | 16 | 3 | 9 | 16 | 29 | 1 | 13 | 5 | 3 | 8 | 4 | 7 | 2 | 4 | 6 | 14 | 3 | 10 | 7 | 5 | 6 | 6 | 25 | 19 | **1** |
| 3 | 0 | 3 | 2 | 3 | 0 | 8 | 4 | 19 | 18 | 9 | 0 | 10 | 0 | 11 | 1 | 10 | 2 | 1 | 16 | 4 | 2 | 2 | 12 | 1 | 1 | 17 | 0 | 1 | 6 | **2** |
| 3 | 0 | 35 | 3 | 22 | 1 | 10 | 3 | 9 | 6 | 4 | 32 | 16 | 14 | 8 | 50 | 4 | 3 | 7 | 7 | 1 | 21 | 6 | 14 | 0 | 20 | 3 | 10 | 7 | 19 | **3** |
| 0 | 17 | 0 | 12 | 2 | 16 | 1 | 12 | 1 | 5 | 5 | 18 | 0 | 12 | 12 | 1 | 7 | 0 | 9 | 5 | 12 | 3 | 13 | 1 | 18 | 5 | 10 | 2 | 10 | 0 | **4** |
| 0 | 2 | 4 | 13 | 16 | 0 | 7 | 3 | 4 | 5 | 3 | 4 | 10 | 9 | 9 | 11 | 8 | 4 | 4 | 4 | 0 | 8 | 21 | 12 | 4 | 1 | 2 | 4 | 7 | 6 | **5** |
| 0 | 22 | 0 | 9 | 0 | 5 | 0 | 13 | 0 | 3 | 1 | 5 | 0 | 4 | 4 | 1 | 16 | 0 | 26 | 12 | 7 | 0 | 1 | 0 | 4 | 0 | 2 | 0 | 3 | 0 | **6** |
| 3 | 13 | 0 | 7 | 0 | 8 | 0 | 4 | 1 | 3 | 7 | 1 | 0 | 1 | 10 | 0 | 5 | 0 | 4 | 7 | 6 | 2 | 3 | 1 | 13 | 0 | 11 | 0 | 13 | 0 | **7** |
| 11 | 4 | 14 | 3 | 5 | 0 | 5 | 2 | 1 | 5 | 4 | 1 | 18 | 2 | 7 | 18 | 1 | 41 | 1 | 5 | 9 | 8 | 4 | 13 | 0 | 38 | 3 | 47 | 4 | 0 | **8** |
| 3 | 20 | 1 | 7 | 0 | 55 | 1 | 11 | 1 | 4 | 3 | 6 | 0 | 12 | 5 | 0 | 5 | 1 | 11 | 4 | 9 | 12 | 6 | 1 | 8 | 1 | 6 | 0 | 5 | 0 | **9** |
| 8 | 0 | 29 | 2 | 5 | 0 | 36 | 1 | 30 | 3 | 8 | 1 | 20 | 6 | 1 | 6 | 1 | 14 | 1 | 3 | 2 | 20 | 0 | 12 | 2 | 14 | 2 | 6 | 4 | 6 | **10** |
| 0 | 0 | 1 | 6 | 14 | 0 | 0 | 7 | 0 | 7 | 1 | 25 | 1 | 17 | 6 | 1 | 9 | 1 | 7 | 2 | 5 | 0 | 10 | 2 | 4 | 0 | 1 | 2 | 4 | 25 | **11** |
| 0 | 2 | 1 | 6 | 1 | 1 | 1 | 5 | 0 | 4 | 1 | 4 | 2 | 8 | 3 | 1 | 15 | 0 | 18 | 6 | 5 | 5 | 1 | 0 | 1 | 0 | 0 | 0 | 1 | 6 | **12** |
| 38 | 4 | 0 | 5 | 9 | 5 | 9 | 4 | 9 | 3 | 11 | 0 | 0 | 4 | 2 | 0 | 2 | 11 | 1 | 3 | 3 | 5 | 6 | 7 | 3 | 2 | 5 | 12 | 6 | 0 | **13** |
| 5 | 11 | 2 | 8 | 3 | 5 | 4 | 7 | 4 | 3 | 4 | 2 | 2 | 6 | 4 | 1 | 3 | 3 | 2 | 4 | 1 | 0 | 20 | 5 | 2 | 2 | 3 | 0 | 4 | 0 | **14** |
| 11 | 0 | 0 | 3 | 6 | 0 | 2 | 1 | 8 | 1 | 5 | 0 | 3 | 0 | 2 | 0 | 0 | 11 | 0 | 2 | 5 | 3 | 1 | 5 | 4 | 10 | 8 | 10 | 3 | 0 | **15** |
| 0 | 4 | 4 | 0 | 2 | 0 | 1 | 9 | 1 | 0 | 0 | 0 | 2 | 1 | 0 | 0 | 3 | 0 | 2 | 1 | 2 | 0 | 1 | 0 | 4 | 0 | 1 | 0 | 0 | 0 | **16** |

**Supplementary Table 11** Signature gene sets for each T/NK cell subset identified by scRNA-seq, used for gene signature scoring in the public HCC scRNA-seq dataset

**[CD4+ T cell_1]**

| SELL | CCR7 | LEF1 | MAL | TCF7 | LDHB | CD55 |
| --- | --- | --- | --- | --- | --- | --- |
| GPR183 | S1PR1 | KLF2 | NOSIP | C1orf162 | BACH2 | SLC2A3 |
| TRABD2A | NELL2 | SESN3 | PDE3B | SH3YL1 | LDLRAP1 | RASGRP2 |
| TESPA1 | SC5D | ABLIM1 | P2RY10 | DGKA | LINC02273 | PRKCQ-AS1 |
| IL6ST | MAML2 | DCXR | ALG13 | ARRDC2 | AL138963.4 |  |

**[CD4+ T cell_2]**

| IL7R | CD40LG | HSPA1B | CCR6 | CDKN1A | CD4 | LGALS3 |
| --- | --- | --- | --- | --- | --- | --- |
| GPR183 | CD5 | BAG3 | IL4I1 |  |  |  |

**[CD4+ T cell_3]**

| FOSB | FOS | EGR1 | LMNA | MAL | NR4A1 | KLF2 |
| --- | --- | --- | --- | --- | --- | --- |
| MYADM | CCR7 | CD40LG | CD4 |  |  |  |

**[CD4+ T cell_4]**

| S100A11 | CD40LG | CISH | CAPG |  |  |  |
| --- | --- | --- | --- | --- | --- | --- |

**[CD4+ T cell_5]**

| MT-CYB | MT-CO2 | MT-ND4L | MT-CO3 | MT-ATP6 | MT-CO1 | MT-ND3 |
| --- | --- | --- | --- | --- | --- | --- |
| MTRNR2L12 | MT-ND4 | MT-ND1 | MT-ND2 | MT-ND5 | MT-ATP8 | FTL |

**[CD8+ T cell_1]**

| CD8B | CD8A | GZMH | GZMK | CCL5 | CCL4 | CCL4L2 |
| --- | --- | --- | --- | --- | --- | --- |
| GZMA | HLA-DRB1 | TNFSF9 | HLA-DPB1 | HLA-DPA1 | COTL1 | CRTAM |
| IFNG | ITM2A | FABP5 | CD74 | CD27 | OASL | ITM2C |
| CYTOR | LAG3 | TOX | SH2D1A | LYST | SRRT |  |

**[CD8+ T cell_2]**

| CD8B | CD8A | GZMK | IER5L | FOSB | EGR1 | TNFSF9 |
| --- | --- | --- | --- | --- | --- | --- |
| MARCKSL1 | ODC1 | RHOB | TUBB2A | SRRT |  |  |

**[cNK cell]**

| FGFBP2 | GZMB | GNLY | FCGR3A | GZMH | KLRD1 | PRF1 |
| --- | --- | --- | --- | --- | --- | --- |
| S1PR5 | CX3CR1 | PLEK | ZEB2 | ADGRG1 | TYROBP | CCL4 |
| SPON2 | EFHD2 | NKG7 | LITAF | CLIC3 | CTSW | TBX21 |
| PLAC8 | CD247 | METRNL | TTC38 | C1orf21 | FCRL6 | FGR |
| KLRC2 | CST7 | KLRF1 | UBE2F | ABHD17A | PRSS23 | ASCL2 |
| CEP78 | SYNGR1 | TRDC | HOPX | ABI3 | AOAH | CD300A |
| GTF3C1 | PTPN12 | RAP1B | CCL4L2 | IFITM2 | ARL4C | ITGB2 |
| PYHIN1 | KLRK1 | C12orf75 | TPST2 | RASA3 | TGFBR3 | APMAP |
| RUNX3 | TFDP2 | SYNE1 | GNG2 | SSBP3 | BIN2 | RASSF1 |
| HSH2D | TRBC1 | MBP | SLC15A4 | LINC00299 | PXN | LPCAT1 |
| IGF2R | CDC42SE1 | UCP2 | CD244 | P2RY8 | FLNA | SH2D2A |
| RAB29 | MCTP2 | C5orf56 | DSTN | SELPLG | S1PR1 | GNPTAB |
| CMC1 | KLF3 | MYO1F | PTPRE | SLA | STK38 | CHST12 |
| TSPAN32 | IFITM3 | SRPK2 | RAB37 | TNFRSF1B | VPS37B | MVD |
| SPN | RASGRP2 | MXRA7 | STARD3NL | MAP3K8 | TMBIM1 | SERPINB1 |
| JAZF1 | SAMD3 | PLEKHF1 | AUTS2 | HLA-DPB1 | AC092821.3 | YES1 |
| PPP3CC | SH3BP5 | PRR5 | ADRB2 | MYO1G | PTPN4 | CEBPB |
| TRAPPC10 | CTSD | MAPRE2 | RGS3 | PTPN18 | ADAM8 | TRG-AS1 |
| SORL1 | ARHGAP25 | EIF4G3 | CISD3 |  |  |  |

**[MAIT cell]**

| TRAV1-2 | KLRB1 | SLC4A10 | NCR3 | TMIGD2 | CEBPD | IL4I1 |
| --- | --- | --- | --- | --- | --- | --- |
| AQP3 | SPOCK2 | ZBTB16 | ITM2C | GPR65 | JAML | SLC7A5 |
| CCR6 | CXCR6 | CCL20 | KLRG1 | ERN1 | LINC01871 | PDE4D |
| GYG1 | TC2N | PFKFB3 | RUNX2 | IFNGR1 | PPP1R14B | PMEPA1 |
| PRR5 | PERP | AUTS2 | GCHFR | SATB1 |  |  |

**[Proliferating T cell]**

| TYMS | NUSAP1 | MKI67 | PCLAF | ASF1B | CLSPN | CENPM |
| --- | --- | --- | --- | --- | --- | --- |
| UBE2T | CDT1 | CENPF | ZWINT | UBE2C | RRM2 | TK1 |
| CENPU | TOP2A | TPX2 | KIFC1 | CDCA8 | TCF19 | PKMYT1 |
| CDK1 | WDR34 | UHRF1 | PRC1 | GINS2 | ASPM | AURKB |
| MCM2 | E2F1 | CEP55 | CDC45 | GTSE1 | DTL | BIRC5 |
| CDC20 | HIST1H3B | HJURP | MYBL2 | CCNA2 | CDCA3 | NCAPG |
| KNL1 | ORC6 | CENPW | CDCA5 | KIF11 | RAD51AP1 | CCNB2 |
| HIST1H3F | TROAP | RAD51 | MXD3 | CKAP2L | FOXM1 | HMMR |
| CDC6 | DIAPH3 | DLGAP5 | PLK1 | FAM111B | CDCA2 | KIF2C |
| NEIL3 | KIF15 | KIF23 | ANLN | KIF4A | MELK | SPC25 |
| HIST1H3G | MND1 | SHCBP1 | CENPA | ESCO2 | DSCC1 | BUB1B |
| POC1A | MCM4 | CDKN3 | PAQR4 | SGO1 | NUF2 | ECT2 |
| TRIP13 | BRCA2 | NCAPH | NCAPG2 | HIST1H1B | CHEK1 | MAD2L1 |
| CDCA7 | BUB1 | CENPE | RACGAP1 | STIL | PARPBP | NDC80 |
| FEN1 | HIST1H2AH | CIP2A | HIST1H3C | HMGB3 | LINC01572 | FANCI |
| BRCA1 | HELLS | DHFR | SAC3D1 | ATAD5 | CCDC34 | MCM7 |
| CKS1B | SMC2 | TIMELESS | GGH | HIST1H2BH | CENPP | ZNF367 |
| ATAD2 | CBR3 | MCM5 | DDX11 | SMC4 | C19orf48 | CENPH |
| DSN1 | GMNN | STMN1 | HIST1H2AL | FANCG | TMEM106C | TMPO-AS1 |
| RCC1 | LMNB1 | IFI27L1 | LMNB2 | BARD1 | SGO2 | FBXO5 |
| NSD2 | RPL39L | CENPK | KIF20B | NRM | DTYMK | SLC29A1 |
| EZH2 | ACOT7 | TTF2 | PCNA | CDK2 | KIF22 | CCNB1 |
| HMGB2 | POLD1 | PXMP2 | PHF19 | CDKN2C | CARHSP1 | MCM3 |
| HIRIP3 | TMPO | MTHFD1 | CENPN | CLN6 | RNASEH2A | LIG1 |
| RFC4 | NCAPD2 | BLM | NUDT1 | HIST1H2AG | RFC5 | TUBG1 |
| GIHCG | SHMT1 | TUBB | HMGN2 | MCM6 | POLD3 | TEDC1 |
| CEP57L1 | WEE1 | DONSON | RFC2 | SAE1 | TUBA1B | RBBP8 |
| DUT | CENPX | HIST1H1C | SLC43A3 | C9orf40 | MAD2L2 | NCAPD3 |
| RRM1 | DEK | MIS18BP1 | AURKA | SKA2 | HAUS8 | GAPDH |
| TACC3 | HADH | HIST1H3D | THOP1 | RPA3 | ITGB3BP | RUVBL2 |
| HIST1H1D | NUCKS1 | CDCA4 | CDK4 | CDKN2A | TFDP1 | ARHGAP19 |
| YEATS4 | SMCO4 | ZDHHC12 | UQCC2 | DNAJC9 | NME1 | YWHAH |
| HMGB1 | ANAPC11 | SNRNP25 | MSH6 | H2AFV | H2AFY | FAM111A |
| TOPBP1 | CKAP5 | SMC1A | PAFAH1B3 | PAICS | MASTL | RANBP1 |
| ALYREF | CCDC18 | MSH2 | CBX1 | DNMT1 | HIST2H2AC | VRK1 |
| LSM4 | IDH2 | BRI3BP | PTTG1 | PSMC3 | UNG | LRR1 |
| GGCT | PDLIM7 | ICMT | DCTPP1 | PRDX3 | HIST1H3H | GUSB |
| HDGF | CKAP2 | PPIA | IPO9 | H2AFZ | USP1 | ANP32E |
| COX8A | PRIM2 | CBX5 | MPDU1 | SHMT2 | MRPL37 | RBBP7 |
| CEP295 | TIMM10 | MT2A | CNTRL | CAMK1 | AC011603.2 | TUBGCP3 |
| TRIOBP | MRPL17 | SLC1A4 | RAE1 | ACAT2 | HIST1H2BC | SPATS2L |
| BCL2L12 | RAD51C | CALM3 | HNRNPA3 | ACYP1 | HPRT1 | REEP4 |
| MEA1 | SUZ12 | TALDO1 | TOR3A | SIVA1 | HAT1 | NABP2 |
| EMC9 | CIAO2A | RTN3 | PA2G4 | RANGAP1 | GPAA1 | TPGS2 |
| FDPS | CCDC167 | NAA38 | SLC25A25 | DPM2 | RAN | ELP6 |
| BOLA3 | GSTO1 | POLD2 | MRPL51 | AP2S1 | HAUS4 | NONO |
| SCCPDH | PDXP | MCUR1 | FN3KRP | SLC25A5 | SAMD1 | SNRPD1 |
| RUSC1 | NCAPH2 | DDX39A | LINC00342 | LSM3 | SPATA5 | RABL6 |
| ANP32B | NUDT21 | MRPS26 | YBX1 | HAUS1 | NUP62 | MBD3 |
| CEP78 | DDB2 | IKBIP | NDUFB1 | UQCRQ | PRPSAP1 | DPP3 |
| PDCD5 | ABHD12 | UBL4A | RPA1 | CASP8AP2 | TPM4 | MAZ |
| HIST1H1E | CTPS1 | NASP | AHCY | MRPL12 | CYC1 | EIF4EBP1 |
| SNRPE | RAB8A | TESC | NENF | GALK1 | CDK19 | HIST1H4C |
| ACTL6A | COX5A | SUMO3 | SNRPA | MPHOSPH9 | ANXA5 | SMC3 |
| NAP1L1 | TPI1 | KMT5A | PSMD1 | BAZ1B | EXOSC8 | COMMD4 |
| SMG9 | TMEM14A | ATP5MC3 | TBC1D10B | RAD21 | CRELD2 | PGP |
| GNG5 | SLBP | ENO1 | MRPS16 | HLA-DRA | DLEU2 | BLOC1S1 |
| HRAS | PMM1 | NFATC2IP | PMF1 | RNASEH2C | PCNT | SSRP1 |
| HLTF | CLTA | SNRPC | PSMB2 | SEPTIN11 | HIP1 | SH3GLB2 |
| HINT2 | GMPPB | SFMBT1 | UQCC3 | UROD | CRIP1 | ALDH16A1 |
| HNRNPAB | HPF1 | AKR1A1 | PKM | FH | ANXA2 | SCLT1 |
| SNRPF | CSRP1 | ILVBL | TEX30 | AFG3L2 | CIDEB | CDK5RAP2 |
| HNRNPF | MVB12A | SYNC | POP7 | WWOX | ERH | BANF1 |
| PSMD14 | EBP | ARL3 | RPL26L1 | ECI1 | ATF3 | AP1M1 |
| MLEC | MZT2B | CTSB | CALU | FARSB | H2AFX | STOML2 |
| PFKL | NDUFS3 | ELP5 | SLC25A11 | LGALS1 | CTNNA1 | TCTEX1D2 |
| VDAC3 | TRAF2 | GON7 | TAF15 | TRIM59 | SDF2L1 | SIGMAR1 |
| TMEM107 | POLR3K | BUD13 | HACD3 | COMTD1 | COX20 | ATOX1 |
| GRHPR | HMGXB4 | NUDCD2 | PSMB6 | ROMO1 | COX6A1 | CEP57 |
| SNRPB | AKT1 | TOR2A | GLO1 | IMPDH2 | NUP50 | COA3 |
| TXN | LSM5 | HSPB11 | KPNB1 | HCFC1 | FAF1 | MLH1 |
| PIN4 | NUTF2 | PDZD11 | DBI | HTATSF1 | PSIP1 | THOC3 |
| CFAP20 | PGAM1 | MZT1 | TSTA3 | HNRNPD | RAC1 | RNPEP |
| AKR7A2 | RRP7A | ILK | ILF2 | GLRX5 | PSMD8 | PRPF19 |
| MRPL27 | RALY | TMEM141 | JPT1 | FBXL6 | ROCK2 | P4HB |
| EIF2B2 | NDUFB11 | PPIH | MAGOHB | UQCRC1 | CBX3 | ISOC2 |
| HMG20B | MRPL52 | SCMH1 | TRAF7 | MTCH2 | PRKDC | MICB |
| SUPT16H | NDUFB3 | ISYNA1 | CTSZ | PDIA6 | PRDX2 | POP4 |
| NUP93 | GMPS | NUCB2 | ANAPC15 | DUSP23 | AKT2 | LAMTOR2 |
| NSMCE2 | PCYT2 | TUBA1C | BAD | DAZAP1 | MIF | SMS |
| PSMA6 | ATP5MPL | DCK | IFRD2 | HIST1H2BK | SEPHS1 | KDM1A |
| MRPS24 | C6orf136 | POLDIP2 | COX6C | ARL2 | AP2A1 | ETFB |
| ANKRD36C | IER3IP1 | PBRM1 | SNRPG | C1orf35 | SLC25A1 | TMEM14C |
| ADA | NSL1 | RHEB | COX6B1 | NOL12 | ARPC5 | HNRNPR |
| RTN4 | TM7SF3 | NDUFAB1 | PRDX4 | RCC2 | FKBP3 | C1orf122 |
| VPS25 | EEF1E1 | TIMM8B | RPP30 | BLVRB | COMMD9 | TOMM40 |
| GSTM1 | DECR1 | PHPT1 | NUP210 | MRPL16 | NDUFC2 | MIR4435-2HG |
| EBNA1BP2 | MT-CO2 | ATP5MF | FABP5 | ELAVL1 | PPM1G | NDUFA11 |
| DCAF7 | TPRKB | GET3 | CDC25B | RBBP4 | MDH1 | MTLN |
| MRPS23 | VPS16 | COTL1 | TXNDC17 | IMMP1L | FAR1 | WDR18 |
| RAD23A | PNKD | NDUFA6 | DCPS | NDUFA2 | PEA15 | NDUFS8 |
| ARMC1 | GNAQ | MPC2 | MRPL11 | ATP13A3 | MPST | GOT2 |
| MTAP | SAP30 | PRKAG1 | PSMA4 | ATP5PF | MTX1 | AK2 |
| POMP | SNRPA1 | ATP2A2 | MRPS11 | SRSF1 | HLA-DQB1 | TIMM23 |
| NFYB | HDLBP | LSM2 | H2AFJ | LRRC59 | ILF3 | GOT1 |
| HCFC1R1 | ENOSF1 | CD59 | MCTS1 | FCHSD2 | HP1BP3 | ATP5F1C |
| GRN | ECHS1 | TKT | LIMS1 | NHP2 | MRPL55 | VMA21 |
| MRPS18B | LEO1 | NDUFB9 | MAP4 | HMGA1 | STAG1 | ATL3 |
| CD74 | TMEM109 | IPO5 | HSBP1 | VDAC1 | R3HDM1 | MTDH |
| SNF8 | NAXE | PSMD3 | PSPH | FARSA | DNPH1 | AK6 |
| HDAC2 | PHB | SLIRP | PSMB5 | KDELR1 | PTPN11 | MRPL57 |
| HIST1H2AC | SPIDR | KPNA2 | FBXL5 | DCTN3 | S100A10 | R3HCC1 |
| ALG5 | ATP5MC1 | ARL6IP1 | BRI3 | KPNA3 | RBM14 | NCOA1 |
| MT-CO1 | SAMM50 | ASAP1 | PPIF | AP1S1 | DAP | PPT1 |
| SMC6 | ADI1 | ETFA | NME2 | TRIAP1 | C20orf27 | MRPS10 |
| ZNF593 | HLA-DRB1 | BRMS1 | HEXA | UPF1 | MT-ND4L | NOP10 |
| TMED3 | CD151 | HLA-DRB5 | PCBD1 | TMEM208 | MT-ATP8 | MRPL24 |
| CAMTA1 | NQO2 | ITPK1 | HIPK2 | TIMM13 | BID | PNKP |
| GLUL | CD63 | GSTP1 | CAT | CAPG | ADNP | CDKN2D |
| IER3 | HEXB | PGD | SOD2 | CLTC | MEF2A | USP12 |
| PDXK | EPN1 | MYDGF | DDT | TIMP1 | NUMA1 | CBR1 |
| HLA-DPA1 | MRPS33 | MRPL13 |  |  |  |  |

**[γδ T cell]**

| TRDV2 | TRGV9 | TRDC | ZNF683 | LINC02446 | KLRD1 | IL12RB2 |
| --- | --- | --- | --- | --- | --- | --- |
| HOPX | METRNL | XCL1 | KLRC1 | GNLY | KLRG1 | LAG3 |
| LYAR | TRBC1 | TRG-AS1 | NINJ1 | TBCD |  |  |

**[Treg]**

| FOXP3 | CTLA4 | TNFRSF4 | TNFRSF18 | TBC1D4 | TIGIT | DUSP4 |
| --- | --- | --- | --- | --- | --- | --- |
| ARID5B | ICOS | BATF | STAM | IKZF2 | CD27 | LAYN |
| IL2RA | RTKN2 | AL136456.1 | LINC01943 | TNFRSF9 | GK | LAIR2 |
| CARD16 | SNX9 | LINC02694 | RGS1 | PELI1 | CORO1B | TTN |
| DUSP16 | DNPH1 | PHTF2 | NCF4 | PHACTR2 | SIRPG | VAV3 |
| NAMPT | SELL | TNFRSF1B | RHOH | LDLRAD4 | PHLDA1 | BACH1 |
| CD28 | GBP2 | CD4 | PIM2 | NIBAN1 | SAMSN1 | SMAP2 |
| IL6ST | GBP5 | PRDM1 | SPOCK2 | GLRX | RHBDD2 | FOXO1 |
| PVT1 | UCP2 | SESN3 | FOXP1 | CXCR6 | GADD45A | CYTOR |
| EPSTI1 | P2RY10 | SOD1 | UGP2 | GLCCI1 | CTSC | LTA |
| HNRNPLL | NCK2 | PKM | PBXIP1 | MIR4435-2HG | BCL2 | CREM |
| AHR | IGFLR1 | BIRC3 | TAB2 | PMAIP1 | GAPDH | CYTIP |
| ZC3H7A | TYMP | TMEM173 | AC009313.1 | PTPRJ | SGMS1 | SAT1 |
| ZNRF2 | TSPAN5 | SLAMF1 | NR3C1 | PTTG1 | CASP1 | FAS |
| SYNGR2 | FKBP1A | SHMT2 | NSD3 | CNST | PPM1G | SMS |
| PIK3IP1 | MIIP | CALM3 | CLEC2D | BTG3 | RFTN1 | TRAF1 |
| TOX | CCR6 | RPS27L | FCMR | MAF | TLK1 | CASK |
| STAT3 | TANK | IL10RA | PCED1B | FAM110A | TNIK | GADD45G |
| CHST11 | TRAF3 | ZNF292 | THEM4 | GRSF1 | CNIH1 | RAB11FIP1 |
| PRDM2 | ZEB1 | IFNAR2 | DGKA | NABP1 | MAPKAPK3 | MAN1A2 |
| ANKRD10 | DLEU2 | ADK | RANBP9 | TSPAN14 | JMY | NEDD9 |
| CISH | LINC01619 | NFAT5 | RAB9A |  |  |  |

**[TrNK]**

| TYROBP | XCL1 | XCL2 | KLRD1 | TRDC | SPRY2 | CD160 |
| --- | --- | --- | --- | --- | --- | --- |
| CCL4 | CCL3 | AOAH | IL2RB | NKG7 | MATK | CMC1 |
| KLRK1 | CCL4L2 | GSTP1 | FCER1G | KLRF1 | LAT2 | CTSW |
| IRF8 | SH2D1B | CD7 | FGR | KLRC1 | KLRC2 | NCAM1 |
| TXK | KRT86 | PLCG2 | IFITM2 | IFITM1 | CCL3L1 | TOX2 |
| CCL5 | FCRL6 | CD81 | PTGDR | ICAM1 | IFITM3 | CLIC3 |
| APMAP | GADD45B | CD63 | CD244 | TIGIT | EOMES | NR4A2 |
| IFNG | CXXC5 | CEBPD | MAP3K8 | FASLG | MCTP2 | STARD3NL |
| RIN3 | HOPX | PLEK | ARPC5L | SH2D1A | TOX | AREG |
| HSPA6 | CRTAM | ARHGAP9 | RHOC | IL12RB2 | IFRD1 | MAPK1 |
| PLAC8 | YES1 | STX11 | PIK3R1 | MAFF | TMIGD2 | SLAMF7 |
| TNFSF14 | PRR7 | CEMIP2 | AGTRAP | PLAAT3 | CLDND1 | AC044849.1 |
| RAB11FIP1 | SLC15A4 | TESC | TIPARP | CTSD | NR4A3 | SNX10 |
| TCIRG1 | PLEKHF1 | RGS3 | PDE4A | RANBP2 | SFMBT2 | TWISTNB |
| ARL5B |  |  |  |  |  |  |

**Supplementary Table 12** Primary MAIT cell upregulated DEGs compared relapsed MAIT cell in scRNA-seq

| **Gene** | **P-value** | **log2FC** | **Adjusted p-value** |
| --- | --- | --- | --- |
| CD74 | 1.03E-135 | -4.38559 | 3.23E-131 |
| GAPDH | 1.04E-118 | -1.40893 | 3.25E-114 |
| JUN | 3.07E-107 | -1.54646 | 9.63E-103 |
| FOS | 9.65E-106 | -1.73248 | 3.02E-101 |
| DUSP1 | 4.43E-81 | -1.12274 | 1.39E-76 |
| SQSTM1 | 1.10E-78 | -2.46476 | 3.45E-74 |
| S100A10 | 2.87E-77 | -2.03756 | 8.99E-73 |
| GNLY | 4.40E-72 | -6.23331 | 1.38E-67 |
| KLF6 | 1.79E-71 | -1.50598 | 5.61E-67 |
| HINT1 | 6.32E-71 | -1.31917 | 1.98E-66 |
| FTL | 2.31E-68 | -3.22488 | 7.24E-64 |
| TMSB10 | 1.47E-67 | -0.83336 | 4.61E-63 |
| TRAV9-2 | 3.16E-63 | -5.81784 | 9.90E-59 |
| SERF2 | 3.88E-60 | -0.84946 | 1.22E-55 |
| NME2 | 6.13E-57 | -2.31805 | 1.92E-52 |
| GSTM1 | 6.40E-55 | -8.9054 | 2.01E-50 |
| FOSB | 8.04E-54 | -1.2368 | 2.52E-49 |
| ATF3 | 3.50E-52 | -4.91508 | 1.10E-47 |
| PPP1R15A | 1.02E-51 | -1.15938 | 3.21E-47 |
| TSC22D3 | 6.37E-49 | -0.94429 | 2.00E-44 |
| ANXA2 | 6.77E-49 | -4.41567 | 2.12E-44 |
| CSTB | 4.72E-47 | -4.48475 | 1.48E-42 |
| KLF2 | 6.26E-44 | -1.44586 | 1.96E-39 |
| SAT1 | 3.15E-43 | -1.89794 | 9.88E-39 |
| HSPA1A | 6.03E-41 | -1.1949 | 1.89E-36 |
| GPX4 | 1.44E-40 | -4.45467 | 4.50E-36 |
| TNF | 1.47E-40 | -1.42712 | 4.61E-36 |
| ATP6V0E1 | 1.12E-38 | -1.29596 | 3.51E-34 |
| LINC00892 | 3.64E-38 | -2.62569 | 1.14E-33 |
| TPI1 | 8.88E-38 | -1.08604 | 2.78E-33 |
| CD69 | 1.64E-37 | -0.83897 | 5.14E-33 |
| PSPH | 8.52E-37 | -4.83325 | 2.67E-32 |
| MIF | 1.04E-36 | -0.76921 | 3.26E-32 |
| GADD45G | 1.31E-35 | -1.91038 | 4.10E-31 |
| YBX1 | 4.01E-35 | -1.13988 | 1.26E-30 |
| PRDX1 | 4.05E-34 | -5.1688 | 1.27E-29 |
| AC020916.1 | 1.97E-33 | -1.32824 | 6.18E-29 |
| PPIB | 1.35E-31 | -0.74753 | 4.24E-27 |
| LINC02446 | 2.50E-31 | -4.55317 | 7.85E-27 |
| RHOB | 4.22E-30 | -3.91771 | 1.32E-25 |
| COX6C | 1.35E-29 | -1.7786 | 4.24E-25 |
| AL021155.5 | 2.48E-29 | -2.22225 | 7.78E-25 |
| ENO1 | 7.74E-29 | -1.39365 | 2.43E-24 |
| AC007952.4 | 7.74E-28 | -1.42884 | 2.43E-23 |
| EGR1 | 1.35E-27 | -1.39723 | 4.24E-23 |
| CITED2 | 7.72E-27 | -0.97101 | 2.42E-22 |
| COX6A1 | 3.80E-26 | -0.95088 | 1.19E-21 |
| PHLDA1 | 7.48E-26 | -1.32107 | 2.34E-21 |
| HSPA1B | 1.39E-25 | -0.58096 | 4.36E-21 |
| NFKBIA | 1.64E-25 | -0.6217 | 5.13E-21 |
| HLA-DRB1 | 1.67E-25 | -6.48947 | 5.25E-21 |
| CCL3L1 | 9.61E-25 | -11.7839 | 3.01E-20 |
| AC022217.3 | 1.49E-24 | -2.33278 | 4.69E-20 |
| HLA-DQB1 | 2.06E-24 | -5.00763 | 6.47E-20 |
| SOD1 | 2.88E-24 | -0.93252 | 9.02E-20 |
| MT-ND3 | 2.75E-23 | -1.46959 | 8.63E-19 |
| AC245014.3 | 4.06E-23 | -1.74078 | 1.27E-18 |
| FYB1 | 4.67E-23 | -1.11942 | 1.46E-18 |
| AC007384.1 | 4.87E-23 | -1.41872 | 1.53E-18 |
| IER2 | 5.09E-23 | -0.76251 | 1.60E-18 |
| TUBB | 1.20E-22 | -1.16275 | 3.77E-18 |
| HOPX | 2.42E-22 | -0.75548 | 7.58E-18 |
| ITGB2 | 3.74E-22 | -0.69623 | 1.17E-17 |
| MT-CO2 | 9.46E-22 | -1.4084 | 2.97E-17 |
| CTSC | 1.64E-21 | -0.61065 | 5.15E-17 |
| CISH | 1.18E-20 | -1.27828 | 3.69E-16 |
| ALDOA | 1.43E-20 | -0.98805 | 4.49E-16 |
| MTDH | 2.81E-20 | -2.48269 | 8.80E-16 |
| GSTP1 | 5.39E-20 | -1.03775 | 1.69E-15 |
| AC087239.1 | 7.09E-20 | -1.66079 | 2.22E-15 |
| TXN | 9.69E-20 | -4.23205 | 3.04E-15 |
| TRBV6-4 | 1.77E-19 | -0.67221 | 5.54E-15 |
| NR4A1 | 2.21E-19 | -0.73625 | 6.92E-15 |
| COTL1 | 2.42E-19 | -1.30688 | 7.57E-15 |
| CD8B | 2.88E-19 | -1.74821 | 9.01E-15 |
| IL23R | 7.15E-19 | -1.41172 | 2.24E-14 |
| LINC00910 | 1.18E-18 | -1.59604 | 3.70E-14 |
| TOB1 | 1.29E-18 | -1.04882 | 4.04E-14 |
| LST1 | 1.45E-18 | -1.49847 | 4.54E-14 |
| UBL5 | 1.60E-18 | -0.5762 | 5.02E-14 |
| PTPN6 | 1.74E-18 | -0.7755 | 5.45E-14 |
| Z93241.1 | 1.94E-18 | -1.36244 | 6.09E-14 |
| CMC1 | 2.52E-18 | -1.1561 | 7.91E-14 |
| TUBB4B | 3.50E-18 | -0.50955 | 1.10E-13 |
| H1FX | 3.73E-18 | -0.7172 | 1.17E-13 |
| AC009313.1 | 8.65E-18 | -2.68774 | 2.71E-13 |
| SAMHD1 | 8.79E-18 | -1.03564 | 2.76E-13 |
| COX6B1 | 2.17E-17 | -1.04915 | 6.82E-13 |
| PEBP1 | 3.13E-17 | -4.75557 | 9.80E-13 |
| CAPG | 3.77E-17 | -1.96221 | 1.18E-12 |
| HLA-DPA1 | 5.00E-17 | -4.96702 | 1.57E-12 |
| AC012447.1 | 6.75E-17 | -1.85108 | 2.12E-12 |
| IER3 | 9.35E-17 | -3.08034 | 2.93E-12 |
| TXK | 1.48E-16 | -2.46349 | 4.63E-12 |
| IFNG | 2.25E-16 | -0.96041 | 7.06E-12 |
| GADD45B | 2.28E-16 | -0.71909 | 7.14E-12 |
| PLEK | 2.71E-16 | -1.64536 | 8.49E-12 |
| AL118516.1 | 3.59E-16 | -1.193 | 1.13E-11 |
| CAP1 | 4.01E-16 | -0.61817 | 1.26E-11 |
| TSPO | 4.04E-16 | -0.84719 | 1.27E-11 |
| XBP1 | 5.43E-16 | -0.832 | 1.70E-11 |
| NRARP | 7.05E-16 | -4.79044 | 2.21E-11 |
| CHCHD10 | 2.28E-15 | -4.25174 | 7.16E-11 |
| HSP90B1 | 4.13E-15 | -1.30523 | 1.30E-10 |
| TALDO1 | 4.70E-15 | -3.81264 | 1.47E-10 |
| MARCKSL1 | 4.91E-15 | -2.01042 | 1.54E-10 |
| PTGDR | 6.03E-15 | -1.42115 | 1.89E-10 |
| YWHAH | 7.86E-15 | -0.87901 | 2.47E-10 |
| AL691403.1 | 9.04E-15 | -2.19334 | 2.83E-10 |
| ANP32A | 1.75E-14 | -1.10787 | 5.50E-10 |
| H2AFX | 2.67E-14 | -0.71404 | 8.37E-10 |
| ATP2B1-AS1 | 3.90E-14 | -1.28258 | 1.22E-09 |
| NDUFA1 | 8.67E-14 | -0.77762 | 2.72E-09 |
| NCF4 | 9.42E-14 | -1.74578 | 2.95E-09 |
| CD63 | 1.04E-13 | -4.68749 | 3.25E-09 |
| DAXX | 1.84E-13 | -1.03815 | 5.77E-09 |
| CD5 | 1.95E-13 | -0.89689 | 6.13E-09 |
| GSTM2 | 3.09E-13 | -1.77716 | 9.69E-09 |
| VPS28 | 8.29E-13 | -1.11613 | 2.60E-08 |
| S100A11 | 1.18E-12 | -0.69327 | 3.69E-08 |
| PSAP | 1.74E-12 | -3.52194 | 5.45E-08 |
| CEBPD | 1.89E-12 | -0.80468 | 5.92E-08 |
| SEPTIN11 | 2.22E-12 | -2.01852 | 6.97E-08 |
| AC243960.1 | 2.36E-12 | -0.97157 | 7.41E-08 |
| SRP9 | 2.39E-12 | -0.74575 | 7.49E-08 |
| ID2 | 3.19E-12 | -0.63232 | 1.00E-07 |
| SYNRG | 3.30E-12 | -0.60148 | 1.03E-07 |
| PTTG1IP | 3.92E-12 | -5.23124 | 1.23E-07 |
| CD40LG | 5.35E-12 | -0.85494 | 1.68E-07 |
| SKAP1 | 5.81E-12 | -0.53648 | 1.82E-07 |
| SIRPG | 7.59E-12 | -0.79457 | 2.38E-07 |
| AOAH | 1.14E-11 | -1.52794 | 3.57E-07 |
| TAGAP | 1.43E-11 | -0.57787 | 4.49E-07 |
| LAIR1 | 2.12E-11 | -2.37708 | 6.65E-07 |
| COX5B | 2.42E-11 | -0.70703 | 7.60E-07 |
| ERCC1 | 2.47E-11 | -1.15917 | 7.74E-07 |
| ATP5MF | 4.47E-11 | -0.73255 | 1.40E-06 |
| SGK1 | 5.35E-11 | -4.67005 | 1.68E-06 |
| KMT2E-AS1 | 6.75E-11 | -1.20126 | 2.12E-06 |
| AHNAK | 6.82E-11 | -0.50536 | 2.14E-06 |
| TUBB2A | 7.17E-11 | -1.45248 | 2.25E-06 |
| TMEM107 | 9.18E-11 | -1.06811 | 2.88E-06 |
| UQCR11 | 1.00E-10 | -0.62086 | 3.14E-06 |
| BCAP31 | 1.21E-10 | -0.7792 | 3.78E-06 |
| ZBTB10 | 1.68E-10 | -1.63456 | 5.27E-06 |
| NEU1 | 1.71E-10 | -0.95892 | 5.35E-06 |
| COX7A2 | 1.88E-10 | -0.86564 | 5.90E-06 |
| ATP5PF | 1.97E-10 | -1.05936 | 6.19E-06 |
| HOOK2 | 2.16E-10 | -1.3177 | 6.76E-06 |
| TEX14 | 2.19E-10 | -1.30154 | 6.87E-06 |
| BBC3 | 2.51E-10 | -0.96148 | 7.86E-06 |
| PKM | 2.81E-10 | -0.50439 | 8.80E-06 |
| PHPT1 | 3.64E-10 | -1.46255 | 1.14E-05 |
| HDAC9 | 3.93E-10 | -2.81112 | 1.23E-05 |
| CDK6 | 5.34E-10 | -0.5841 | 1.67E-05 |
| BAX | 5.59E-10 | -0.66453 | 1.75E-05 |
| SH3BP5 | 5.77E-10 | -1.3317 | 1.81E-05 |
| RPS27L | 6.27E-10 | -1.04262 | 1.96E-05 |
| TADA3 | 6.41E-10 | -0.99441 | 2.01E-05 |
| MT-ATP6 | 6.89E-10 | -1.46648 | 2.16E-05 |
| NUCB2 | 7.07E-10 | -1.07662 | 2.22E-05 |
| RNF167 | 8.95E-10 | -0.55496 | 2.81E-05 |
| ATP5MC3 | 9.45E-10 | -0.99285 | 2.96E-05 |
| AC018816.1 | 1.01E-09 | -0.77044 | 3.17E-05 |
| PRDX6 | 1.06E-09 | -4.36952 | 3.33E-05 |
| PHB | 1.16E-09 | -3.76372 | 3.64E-05 |
| PARK7 | 1.28E-09 | -0.60227 | 4.02E-05 |
| COX5A | 1.34E-09 | -1.80265 | 4.21E-05 |
| RASD1 | 1.53E-09 | -0.76244 | 4.81E-05 |
| SLAMF1 | 1.81E-09 | -0.55057 | 5.68E-05 |
| AC015849.1 | 2.08E-09 | -1.38713 | 6.52E-05 |
| COX8A | 2.29E-09 | -0.65557 | 7.18E-05 |
| CD27 | 2.41E-09 | -0.71495 | 7.55E-05 |
| BICRAL | 3.01E-09 | -0.77738 | 9.43E-05 |
| NDUFA11 | 3.13E-09 | -0.85341 | 9.82E-05 |
| TNFSF12 | 3.26E-09 | -0.59841 | 1.02.E-04 |
| LINC01004 | 3.34E-09 | -1.60448 | 1.05.E-04 |
| RASSF7 | 3.44E-09 | -0.91005 | 1.08.E-04 |
| S100PBP | 3.72E-09 | -1.0352 | 1.17.E-04 |
| ANAPC11 | 4.61E-09 | -3.92919 | 1.44.E-04 |
| AC004687.1 | 4.64E-09 | -0.57723 | 1.45.E-04 |
| ITK | 5.01E-09 | -0.67128 | 1.57.E-04 |
| HSPB1 | 5.20E-09 | -1.20019 | 1.63.E-04 |
| TYROBP | 6.30E-09 | -3.94094 | 1.97.E-04 |
| TNFSF8 | 6.34E-09 | -1.07067 | 1.99.E-04 |
| RIPOR2 | 6.88E-09 | -0.54045 | 2.16.E-04 |
| LYST | 7.92E-09 | -0.90319 | 2.48.E-04 |
| GABARAP | 9.96E-09 | -0.52473 | 3.12.E-04 |
| GIMAP6 | 1.17E-08 | -1.11933 | 3.67.E-04 |
| SLF1 | 1.24E-08 | -1.46218 | 3.89.E-04 |
| ELOB | 1.24E-08 | -0.63619 | 3.90.E-04 |
| DIP2A | 1.34E-08 | -1.04799 | 4.19.E-04 |
| ATP5PD | 1.35E-08 | -0.89788 | 4.23.E-04 |
| COL6A2 | 1.46E-08 | -9.2034 | 4.57.E-04 |
| CDKN1C | 1.64E-08 | -0.8778 | 5.15.E-04 |
| CD226 | 1.80E-08 | -0.89816 | 5.63.E-04 |
| TRAC | 1.91E-08 | -0.55161 | 6.00.E-04 |
| PATL2 | 2.09E-08 | -1.11675 | 6.54.E-04 |
| HLA-DPB1 | 2.10E-08 | -4.95245 | 6.58.E-04 |
| CTSD | 2.62E-08 | -3.39353 | 8.23.E-04 |
| ICAM2 | 2.67E-08 | -0.54855 | 8.37.E-04 |
| CCL4L2 | 2.72E-08 | -1.85306 | 8.52.E-04 |
| KDM4B | 2.77E-08 | -0.8498 | 8.68.E-04 |
| NEDD8 | 2.77E-08 | -0.6444 | 8.68.E-04 |
| DUSP6 | 2.79E-08 | -2.58364 | 8.75.E-04 |
| NAA38 | 2.80E-08 | -1.28601 | 8.79.E-04 |
| AC025164.1 | 3.30E-08 | -0.968 | 1.03.E-03 |
| TUBA1C | 3.42E-08 | -0.73312 | 1.07.E-03 |
| P4HB | 3.57E-08 | -1.12616 | 1.12.E-03 |
| ATP5IF1 | 3.71E-08 | -0.65472 | 1.16.E-03 |
| LAMTOR4 | 4.14E-08 | -0.50911 | 1.30.E-03 |
| CROCC | 4.22E-08 | -0.92983 | 1.32.E-03 |
| AC243829.1 | 4.31E-08 | -0.86573 | 1.35.E-03 |
| ECH1 | 4.80E-08 | -0.89696 | 1.51.E-03 |
| TRG-AS1 | 5.37E-08 | -0.64827 | 1.68.E-03 |
| SPCS1 | 5.65E-08 | -0.60743 | 1.77.E-03 |
| LY9 | 6.35E-08 | -0.63726 | 1.99.E-03 |
| CD160 | 6.98E-08 | -0.99756 | 2.19.E-03 |
| GZMH | 9.10E-08 | -0.86323 | 2.85.E-03 |
| AL499604.1 | 9.82E-08 | -0.92874 | 3.08.E-03 |
| COA8 | 1.00E-07 | -2.64059 | 3.14.E-03 |
| PSMD4 | 1.16E-07 | -2.63636 | 3.64.E-03 |
| NDUFC2 | 1.20E-07 | -2.33696 | 3.77.E-03 |
| AC253572.2 | 1.22E-07 | -1.07986 | 3.81.E-03 |
| MT-ND4L | 1.41E-07 | -0.89637 | 4.42.E-03 |
| PECAM1 | 1.46E-07 | -5.0472 | 4.59.E-03 |
| TPST2 | 1.98E-07 | -0.71677 | 6.20.E-03 |
| ELOC | 3.05E-07 | -0.94998 | 9.55.E-03 |
| MFHAS1 | 3.24E-07 | -1.01049 | 1.02.E-02 |
| DOCK8 | 3.25E-07 | -0.58317 | 1.02.E-02 |
| RHOC | 3.52E-07 | -0.71503 | 1.10.E-02 |
| HEXIM1 | 4.20E-07 | -0.68607 | 1.32.E-02 |
| NDUFA3 | 4.88E-07 | -0.57548 | 1.53.E-02 |
| CA5B | 4.94E-07 | -0.94565 | 1.55.E-02 |
| WDR74 | 6.82E-07 | -0.70234 | 2.14.E-02 |
| NDUFS2 | 6.94E-07 | -3.08452 | 2.18.E-02 |
| ING1 | 7.14E-07 | -0.84997 | 2.24.E-02 |
| NDUFB9 | 7.77E-07 | -4.39226 | 2.44.E-02 |
| SELENOH | 7.84E-07 | -0.62813 | 2.46.E-02 |
| PRDX2 | 9.30E-07 | -0.81786 | 2.92.E-02 |
| ATP5MD | 9.41E-07 | -0.56548 | 2.95.E-02 |
| ZNF652 | 9.82E-07 | -0.65803 | 3.08.E-02 |
| NME3 | 1.05E-06 | -0.5983 | 3.29.E-02 |
| MYO1G | 1.06E-06 | -0.52066 | 3.33.E-02 |
| NUP62 | 1.12E-06 | -0.69782 | 3.52.E-02 |
| NAPRT | 1.15E-06 | -3.04085 | 3.61.E-02 |
| SLC2A4RG | 1.17E-06 | -0.52517 | 3.66.E-02 |
| RPS6KA1 | 1.20E-06 | -0.77415 | 3.77.E-02 |
| RAB5C | 1.27E-06 | -0.57744 | 3.99.E-02 |
| ME1 | 1.29E-06 | -3.44316 | 4.03.E-02 |
| NFE2L3 | 1.37E-06 | -1.24234 | 4.29.E-02 |
| YME1L1 | 1.37E-06 | -0.5927 | 4.30.E-02 |
| CIDEB | 1.42E-06 | -0.75561 | 4.44.E-02 |
| HIST1H1D | 1.58E-06 | -1.07498 | 4.94.E-02 |

**Supplementary Table 13** Relapsed MAIT cell upregulated DEGs compared primary MAIT cell in scRNA-seq

| **Gene** | **P-value** | **log2FC** | **Adjusted p-value** |
| --- | --- | --- | --- |
| HLA-C | 9.69E-220 | 1.193841 | 3.04E-215 |
| RPL13A | 8.50E-147 | 1.860446 | 2.67E-142 |
| RPL28 | 4.42E-126 | 0.569205 | 1.39E-121 |
| RPLP1 | 7.51E-95 | 0.523419 | 2.36E-90 |
| CXCR4 | 3.90E-87 | 1.222872 | 1.22E-82 |
| HLA-B | 3.35E-78 | 0.534633 | 1.05E-73 |
| KLRB1 | 1.93E-66 | 0.823343 | 6.06E-62 |
| LDHA | 1.72E-63 | 1.35368 | 5.38E-59 |
| METRNL | 1.82E-60 | 2.318597 | 5.71E-56 |
| SPOCK2 | 4.36E-60 | 1.285341 | 1.37E-55 |
| PMEPA1 | 2.87E-40 | 2.806585 | 9.00E-36 |
| PDCD4 | 7.72E-40 | 1.137042 | 2.42E-35 |
| RPS4Y1 | 2.06E-33 | 0.7096 | 6.47E-29 |
| SARAF | 4.86E-33 | 0.598439 | 1.52E-28 |
| RPS10 | 2.05E-31 | 1.118452 | 6.44E-27 |
| NINJ1 | 1.27E-30 | 1.625878 | 3.98E-26 |
| IL7R | 2.98E-29 | 0.711859 | 9.34E-25 |
| ITM2C | 7.01E-26 | 0.979941 | 2.20E-21 |
| PLP2 | 5.56E-25 | 0.874098 | 1.74E-20 |
| AUTS2 | 2.59E-24 | 1.544698 | 8.12E-20 |
| NXT1 | 5.77E-24 | 1.240776 | 1.81E-19 |
| UBE2B | 7.89E-24 | 1.027091 | 2.47E-19 |
| REL | 1.01E-23 | 1.017769 | 3.15E-19 |
| SLC7A5 | 1.05E-23 | 1.038449 | 3.28E-19 |
| PPP1R2 | 1.31E-23 | 1.09695 | 4.11E-19 |
| CD55 | 2.27E-22 | 1.035723 | 7.12E-18 |
| TUBA4A | 2.60E-22 | 1.07387 | 8.15E-18 |
| DNAJB6 | 3.83E-22 | 0.85701 | 1.20E-17 |
| TRBV6-1 | 3.83E-21 | 2.003841 | 1.20E-16 |
| RALGAPA1 | 4.01E-20 | 1.122079 | 1.26E-15 |
| TC2N | 2.60E-19 | 0.996218 | 8.15E-15 |
| ZFP36L2 | 4.71E-19 | 0.566697 | 1.48E-14 |
| DUSP4 | 9.20E-19 | 2.350697 | 2.88E-14 |
| ERN1 | 1.33E-18 | 0.881852 | 4.16E-14 |
| GZMM | 2.51E-18 | 0.754625 | 7.86E-14 |
| SKIL | 3.35E-18 | 0.984315 | 1.05E-13 |
| PPDPF | 3.36E-18 | 0.59215 | 1.05E-13 |
| PPP1R14B | 3.50E-18 | 1.176738 | 1.10E-13 |
| PDE4B | 3.72E-18 | 0.880457 | 1.17E-13 |
| ALOX5AP | 4.37E-18 | 0.598409 | 1.37E-13 |
| CAMK4 | 5.02E-18 | 1.002367 | 1.57E-13 |
| CCNG2 | 9.85E-18 | 1.86227 | 3.09E-13 |
| LEPROTL1 | 7.31E-17 | 0.748918 | 2.29E-12 |
| TNFSF13B | 8.27E-17 | 2.185274 | 2.59E-12 |
| RGCC | 8.78E-17 | 0.888118 | 2.75E-12 |
| PIM3 | 1.20E-16 | 1.040511 | 3.76E-12 |
| OCIAD2 | 1.72E-16 | 1.055562 | 5.39E-12 |
| CD7 | 4.59E-16 | 0.599449 | 1.44E-11 |
| NXPH4 | 6.04E-16 | 4.998944 | 1.89E-11 |
| TRAV1-2 | 7.97E-16 | 0.545864 | 2.50E-11 |
| BIRC3 | 2.61E-15 | 1.138265 | 8.19E-11 |
| NCF1 | 2.90E-15 | 1.133226 | 9.09E-11 |
| EMD | 6.63E-15 | 0.872769 | 2.08E-10 |
| RHOF | 2.85E-14 | 0.874684 | 8.94E-10 |
| JMJD6 | 3.77E-14 | 0.895639 | 1.18E-09 |
| GAS5 | 9.32E-14 | 0.913789 | 2.92E-09 |
| FAM177A1 | 1.24E-13 | 0.880481 | 3.89E-09 |
| CST7 | 1.31E-13 | 0.511244 | 4.10E-09 |
| GPBP1 | 1.52E-13 | 0.779009 | 4.78E-09 |
| AQP3 | 2.38E-13 | 0.667213 | 7.46E-09 |
| MXD4 | 2.73E-13 | 1.0044 | 8.58E-09 |
| PDE7A | 3.12E-13 | 0.74672 | 9.77E-09 |
| GPR35 | 4.87E-13 | 1.421365 | 1.53E-08 |
| GCHFR | 5.47E-13 | 1.249162 | 1.72E-08 |
| PAXX | 8.48E-13 | 0.57668 | 2.66E-08 |
| CCR6 | 1.03E-12 | 0.722714 | 3.24E-08 |
| PDE3B | 2.07E-12 | 1.464296 | 6.48E-08 |
| HIBCH | 2.49E-12 | 1.844412 | 7.80E-08 |
| EMB | 3.56E-12 | 0.791203 | 1.12E-07 |
| CNOT6L | 3.68E-12 | 1.021028 | 1.15E-07 |
| YPEL3 | 5.69E-12 | 0.683026 | 1.79E-07 |
| FYN | 1.31E-11 | 0.595179 | 4.11E-07 |
| NFKB1 | 1.87E-11 | 0.791718 | 5.85E-07 |
| SH2D2A | 1.95E-11 | 0.765461 | 6.12E-07 |
| ZBTB1 | 2.43E-11 | 1.107167 | 7.61E-07 |
| TRBV20-1 | 3.09E-11 | 0.703864 | 9.70E-07 |
| CREM | 4.72E-11 | 0.76758 | 1.48E-06 |
| YIPF5 | 9.90E-11 | 1.0673 | 3.11E-06 |
| TMIGD2 | 1.08E-10 | 0.735916 | 3.39E-06 |
| CDKN1B | 2.33E-10 | 0.739579 | 7.30E-06 |
| SNHG16 | 2.34E-10 | 0.931291 | 7.33E-06 |
| STAT4 | 2.44E-10 | 0.565965 | 7.65E-06 |
| VAMP2 | 2.80E-10 | 0.639412 | 8.79E-06 |
| CHD1 | 3.20E-10 | 0.829281 | 1.00E-05 |
| PRR7 | 5.82E-10 | 1.202712 | 1.83E-05 |
| TGIF1 | 8.40E-10 | 0.995316 | 2.64E-05 |
| GYPC | 1.23E-09 | 0.564121 | 3.84E-05 |
| PFKFB3 | 1.45E-09 | 0.806626 | 4.56E-05 |
| SELENOK | 1.76E-09 | 0.526749 | 5.52E-05 |
| RBM38 | 5.38E-09 | 0.712308 | 1.69.E-04 |
| EIF5 | 5.95E-09 | 0.582107 | 1.87.E-04 |
| TERF2IP | 6.15E-09 | 0.558906 | 1.93.E-04 |
| SMAD7 | 7.71E-09 | 0.784555 | 2.42.E-04 |
| UBE2D3 | 9.76E-09 | 0.531252 | 3.06.E-04 |
| TGFB1 | 1.02E-08 | 0.512736 | 3.19.E-04 |
| ISG20 | 1.94E-08 | 0.707151 | 6.09.E-04 |
| RELB | 1.96E-08 | 0.798251 | 6.16.E-04 |
| ARID5A | 2.30E-08 | 0.753143 | 7.22.E-04 |
| ATP8A1 | 2.39E-08 | 1.733917 | 7.49.E-04 |
| WNT1 | 2.83E-08 | 1.573131 | 8.88.E-04 |
| LDLRAD4 | 3.10E-08 | 1.503208 | 9.71.E-04 |
| RGS1 | 3.10E-08 | 0.610447 | 9.73.E-04 |
| GOLGA8A | 3.13E-08 | 1.182359 | 9.81.E-04 |
| TIPARP | 3.31E-08 | 0.900372 | 1.04.E-03 |
| MED30 | 4.33E-08 | 0.882085 | 1.36.E-03 |
| CACYBP | 4.55E-08 | 0.716105 | 1.43.E-03 |
| AHI1 | 4.64E-08 | 1.887455 | 1.46.E-03 |
| CTSA | 4.94E-08 | 0.785188 | 1.55.E-03 |
| P2RY8 | 6.12E-08 | 0.976764 | 1.92.E-03 |
| VPS37B | 7.94E-08 | 0.659756 | 2.49.E-03 |
| LITAF | 9.34E-08 | 0.592358 | 2.93.E-03 |
| FAM118A | 1.03E-07 | 1.675973 | 3.24.E-03 |
| CMC2 | 1.53E-07 | 0.771507 | 4.80.E-03 |
| CD44 | 2.12E-07 | 0.533594 | 6.66.E-03 |
| HSPH1 | 2.20E-07 | 0.535564 | 6.91.E-03 |
| ITM2A | 2.42E-07 | 0.939868 | 7.57.E-03 |
| TM2D3 | 2.50E-07 | 0.849216 | 7.85.E-03 |
| AVPI1 | 2.75E-07 | 1.197343 | 8.63.E-03 |
| MOB4 | 3.01E-07 | 0.827758 | 9.44.E-03 |
| CCL20 | 6.31E-07 | 0.926042 | 1.98.E-02 |
| CHIC2 | 7.42E-07 | 0.732297 | 2.33.E-02 |
| SS18L2 | 7.82E-07 | 0.672361 | 2.45.E-02 |
| RNF125 | 8.27E-07 | 0.787608 | 2.59.E-02 |
| BCL3 | 1.03E-06 | 0.541629 | 3.23.E-02 |
| TRAF4 | 1.04E-06 | 1.154304 | 3.26.E-02 |
| CENPN | 1.09E-06 | 1.298328 | 3.42.E-02 |
| FDX1 | 1.49E-06 | 0.761133 | 4.67.E-02 |
| NFE2L2 | 1.53E-06 | 0.563086 | 4.79.E-02 |

**Supplementary Table 14** Cell–cell interaction scores between malignant hepatocytes and MAIT cells calculated using CellPhoneDB based on scRNA-seq data.

| **Interacting pair** | | **Primary MAIT|Malignant Hepatocyte** | **Relapsed_MAIT| Malignant Hepatocyte** | **Malignant Hepatocyte |Primary_MAIT** | **Malignant Hepatocyte |Relapsed_MAIT** |
| --- | --- | --- | --- | --- | --- |
| CDH1_integrin_a2b1_complex | | 0 | 0 | 0 | 0 |
| COL10A1_integrin_a2b1_complex | | 0 | 0 | 0 | 0 |
| COL11A1_integrin_a2b1_complex | | 0.024 | 0 | 0 | 0 |
| COL11A2_integrin_a2b1_complex | | 0 | 0.023 | 0 | 0 |
| COL12A1_integrin_a2b1_complex | | 0 | 0 | 0 | 0 |
| COL13A1_integrin_a2b1_complex | | 0 | 0 | 0 | 0 |
| COL14A1_integrin_a2b1_complex | | 0 | 0 | 0 | 0 |
| COL15A1_integrin_a2b1_complex | | 0 | 0 | 0 | 0 |
| COL16A1_integrin_a2b1_complex | | 0 | 0 | 0 | 0 |
| COL17A1_integrin_a2b1_complex | | 0 | 0 | 0 | 0 |
| COL18A1_integrin_a2b1_complex | | 0 | 0 | 0 | 0 |
| COL19A1_integrin_a2b1_complex | | 0 | 0 | 0 | 0 |
| COL1A1_integrin_a2b1_complex | | 0.034 | 0 | 0 | 0 |
| COL20A1_integrin_a2b1_complex | | 0 | 0 | 0 | 0 |
| COL21A1_integrin_a2b1_complex | | 0 | 0 | 0 | 0 |
| COL22A1_integrin_a2b1_complex | | 0 | 0 | 0 | 0 |
| COL24A1_integrin_a2b1_complex | | 0 | 0 | 0 | 0 |
| COL26A1_integrin_a2b1_complex | | 0 | 0 | 0 | 0 |
| COL27A1_integrin_a2b1_complex | | 0 | 0 | 0 | 0 |
| COL28A1_integrin_a2b1_complex | | 0 | 0 | 0 | 0 |
| COL2A1_integrin_a2b1_complex | | 0.023 | 0 | 0 | 0 |
| COL3A1_integrin_a2b1_complex | | 0 | 0 | 0 | 0 |
| COL4A2_integrin_a2b1_complex | | 0 | 0 | 0 | 0 |
| COL4A3_integrin_a2b1_complex | | 0.024 | 0.022 | 0 | 0 |
| COL4A4_integrin_a2b1_complex | | 0 | 0.022 | 0 | 0 |
| COL4A5_integrin_a2b1_complex | | 0 | 0 | 0 | 0 |
| COL4A6_integrin_a2b1_complex | | 0 | 0 | 0 | 0 |
| COL5A1_integrin_a2b1_complex | | 0.048 | 0.023 | 0 | 0 |
| COL5A2_integrin_a2b1_complex | | 0 | 0 | 0 | 0 |
| COL5A3_integrin_a2b1_complex | | 0.029 | 0 | 0 | 0 |
| COL6A1_integrin_a2b1_complex | | 0.033 | 0 | 0 | 0 |
| COL6A2_integrin_a2b1_complex | | 0.217 | 0 | 0 | 0 |
| COL6A3_integrin_a2b1_complex | | 0 | 0 | 0 | 0 |
| COL6A5_integrin_a2b1_complex | | 0 | 0 | 0 | 0 |
| COL6A6_integrin_a2b1_complex | | 0.024 | 0 | 0 | 0 |
| COL7A1_integrin_a2b1_complex | | 0 | 0.024 | 0 | 0 |
| COL8A1_integrin_a2b1_complex | | 0 | 0 | 0 | 0 |
| COL8A2_integrin_a2b1_complex | | 0 | 0 | 0 | 0 |
| COL9A1_integrin_a2b1_complex | | 0 | 0 | 0 | 0 |
| COL9A2_integrin_a2b1_complex | | 0.024 | 0.024 | 0 | 0 |
| COL9A3_integrin_a2b1_complex | | 0 | 0 | 0 | 0 |
| FN1_integrin_a2b1_complex | | 0 | 0 | 0 | 0 |
| LAMC1_integrin_a2b1_complex | | 0 | 0 | 0 | 0 |
| CDH1_integrin_aEb7_complex | | 0 | 0 | 0.509 | 0.589 |
| CDH1_KLRG1 | | 0 | 0 | 1.242 | 1.545 |
| CDH2_CDH2 | | 0.409 | 0 | 0.409 | 0 |
| CDH2_FCER2 | | 0.002 | 0 | 0 | 0 |
| CDH3_CDH3 | | 0 | 0 | 0 | 0 |
| CDH5_CDH5 | | 0 | 0 | 0 | 0 |
| CDH6_CDH6 | | 0 | 0 | 0 | 0 |
| CDH7_CDH7 | | 0 | 0 | 0 | 0 |
| CADM1_CADM1 | | 0 | 0.116 | 0 | 0.116 |
| CADM3_CADM1 | | 0 | 0 | 0 | 0.008 |
| CRTAM_CADM1 | | 0.26 | 0.241 | 0 | 0.009 |
| CADM1_NECTIN3 | | 0 | 0.391 | 0.147 | 0.134 |
| CADM3_NECTIN3 | | 0 | 0 | 0.039 | 0.026 |
| NECTIN1_NECTIN3 | | 0.391 | 0.399 | 0.05 | 0.037 |
| NECTIN2_NECTIN3 | | 0 | 0 | 0.958 | 0.946 |
| CADM3_CADM4 | | 0 | 0 | 0 | 0.001 |
| CADM3_EPB41L1 | | 0 | 0 | 0 | 0 |
| CEACAM1_CD209 | | 0.007 | 0.001 | 0 | 0 |
| ICAM2_CD209 | | 0.578 | 0.396 | 0 | 0 |
| ICAM3_CD209 | | 1.424 | 1.384 | 0 | 0 |
| CEACAM1_CEACAM6 | | 0.007 | 0.001 | 0 | 0 |
| CEACAM6_CEACAM6 | | 0 | 0 | 0 | 0 |
| CEACAM8_CEACAM6 | | 0 | 0 | 0 | 0 |
| CEACAM1_CEACAM8 | | 0.007 | 0.001 | 0 | 0 |
| CEACAM1_SELE | | 0.018 | 0.012 | 0 | 0.091 |
| PODXL2_SELE | | 0.011 | 0.013 | 0 | 0.028 |
| SELPLG_SELE | | 0.72 | 0.919 | 0 | 0.002 |
| CD44_SELE | | 1.43 | 2.066 | 0 | 0.019 |
| COL10A1_integrin_a1b1_complex | | 0 | 0 | 0.016 | 0.033 |
| COL11A1_integrin_a1b1_complex | | 0.093 | 0 | 0.169 | 0.186 |
| COL11A2_integrin_a1b1_complex | | 0 | 0.093 | 0.076 | 0.092 |
| COL12A1_integrin_a1b1_complex | | 0 | 0 | 0.021 | 0.038 |
| COL13A1_integrin_a1b1_complex | | 0 | 0 | 0.015 | 0.031 |
| COL14A1_integrin_a1b1_complex | | 0 | 0 | 0.018 | 0.034 |
| COL15A1_integrin_a1b1_complex | | 0 | 0 | 0.015 | 0.031 |
| COL16A1_integrin_a1b1_complex | | 0 | 0 | 0.02 | 0.037 |
| COL17A1_integrin_a1b1_complex | | 0 | 0 | 0.015 | 0.031 |
| COL18A1_integrin_a1b1_complex | | 0 | 0 | 0.672 | 0.688 |
| COL19A1_integrin_a1b1_complex | | 0 | 0 | 0.017 | 0.033 |
| COL1A1_integrin_a1b1_complex | | 0.103 | 0 | 0 | 0 |
| COL20A1_integrin_a1b1_complex | | 0 | 0 | 0.015 | 0.031 |
| COL21A1_integrin_a1b1_complex | | 0 | 0 | 0.015 | 0.032 |
| COL22A1_integrin_a1b1_complex | | 0 | 0 | 0.015 | 0.032 |
| COL24A1_integrin_a1b1_complex | | 0 | 0 | 0.042 | 0.058 |
| COL26A1_integrin_a1b1_complex | | 0 | 0 | 0.018 | 0.034 |
| COL27A1_integrin_a1b1_complex | | 0 | 0 | 0.182 | 0.198 |
| COL28A1_integrin_a1b1_complex | | 0 | 0 | 0.026 | 0.043 |
| COL2A1_integrin_a1b1_complex | | 0.093 | 0 | 0.038 | 0.054 |
| COL3A1_integrin_a1b1_complex | | 0 | 0 | 0.017 | 0.033 |
| COL4A2_integrin_a1b1_complex | | 0 | 0 | 0.03 | 0.047 |
| COL4A3_integrin_a1b1_complex | | 0.094 | 0.092 | 0.05 | 0.066 |
| COL4A4_integrin_a1b1_complex | | 0 | 0.092 | 0.064 | 0.08 |
| COL4A5_integrin_a1b1_complex | | 0 | 0 | 0.062 | 0.078 |
| COL4A6_integrin_a1b1_complex | | 0 | 0 | 0.016 | 0.033 |
| COL5A1_integrin_a1b1_complex | | 0.118 | 0.093 | 0 | 0 |
| COL5A2_integrin_a1b1_complex | | 0 | 0 | 0.118 | 0.134 |
| COL5A3_integrin_a1b1_complex | | 0.099 | 0 | 0.06 | 0.077 |
| COL6A1_integrin_a1b1_complex | | 0.103 | 0 | 0.045 | 0.062 |
| COL6A2_integrin_a1b1_complex | | 0.286 | 0 | 0.015 | 0.031 |
| COL6A3_integrin_a1b1_complex | | 0 | 0 | 0.018 | 0.034 |
| COL6A5_integrin_a1b1_complex | | 0 | 0 | 0.015 | 0.031 |
| COL6A6_integrin_a1b1_complex | | 0.093 | 0 | 0.016 | 0.032 |
| COL7A1_integrin_a1b1_complex | | 0 | 0.093 | 0.017 | 0.034 |
| COL8A1_integrin_a1b1_complex | | 0 | 0 | 0.015 | 0.031 |
| COL8A2_integrin_a1b1_complex | | 0 | 0 | 0.025 | 0.042 |
| COL9A1_integrin_a1b1_complex | | 0 | 0 | 0.017 | 0.033 |
| COL9A2_integrin_a1b1_complex | | 0.093 | 0.094 | 0.11 | 0.126 |
| COL9A3_integrin_a1b1_complex | | 0 | 0 | 0.09 | 0.107 |
| SEMA7A_integrin_a1b1_complex | | 0.126 | 0.152 | 0.02 | 0.037 |
| COL10A1_integrin_a10b1_complex | | 0 | 0 | 0.008 | 0.002 |
| COL11A1_integrin_a10b1_complex | | 0.003 | 0 | 0.161 | 0.154 |
| COL11A2_integrin_a10b1_complex | | 0 | 0.003 | 0.068 | 0.061 |
| COL12A1_integrin_a10b1_complex | | 0 | 0 | 0.013 | 0.006 |
| COL13A1_integrin_a10b1_complex | | 0 | 0 | 0.007 | 0 |
| COL14A1_integrin_a10b1_complex | | 0 | 0 | 0.009 | 0.003 |
| COL15A1_integrin_a10b1_complex | | 0 | 0 | 0.007 | 0 |
| COL16A1_integrin_a10b1_complex | | 0 | 0 | 0.012 | 0.005 |
| COL17A1_integrin_a10b1_complex | | 0 | 0 | 0.007 | 0 |
| COL18A1_integrin_a10b1_complex | | 0 | 0 | 0.664 | 0.657 |
| COL19A1_integrin_a10b1_complex | | 0 | 0 | 0.009 | 0.002 |
| COL1A1_integrin_a10b1_complex | | 0.013 | 0 | 0 | 0 |
| COL20A1_integrin_a10b1_complex | | 0 | 0 | 0.007 | 0 |
| COL21A1_integrin_a10b1_complex | | 0 | 0 | 0.007 | 0.001 |
| COL22A1_integrin_a10b1_complex | | 0 | 0 | 0.007 | 0 |
| COL24A1_integrin_a10b1_complex | | 0 | 0 | 0.034 | 0.027 |
| COL26A1_integrin_a10b1_complex | | 0 | 0 | 0.01 | 0.003 |
| COL27A1_integrin_a10b1_complex | | 0 | 0 | 0.173 | 0.167 |
| COL28A1_integrin_a10b1_complex | | 0 | 0 | 0.018 | 0.011 |
| COL2A1_integrin_a10b1_complex | | 0.003 | 0 | 0.03 | 0.023 |
| COL3A1_integrin_a10b1_complex | | 0 | 0 | 0.008 | 0.002 |
| COL4A2_integrin_a10b1_complex | | 0 | 0 | 0.022 | 0.015 |
| COL4A3_integrin_a10b1_complex | | 0.004 | 0.002 | 0.042 | 0.035 |
| COL4A4_integrin_a10b1_complex | | 0 | 0.002 | 0.056 | 0.049 |
| COL4A5_integrin_a10b1_complex | | 0 | 0 | 0.054 | 0.047 |
| COL4A6_integrin_a10b1_complex | | 0 | 0 | 0.008 | 0.002 |
| COL5A1_integrin_a10b1_complex | | 0.028 | 0.003 | 0 | 0 |
| COL5A2_integrin_a10b1_complex | | 0 | 0 | 0.11 | 0.103 |
| COL5A3_integrin_a10b1_complex | | 0.009 | 0 | 0.052 | 0.046 |
| COL6A1_integrin_a10b1_complex | | 0.013 | 0 | 0.037 | 0.031 |
| COL6A2_integrin_a10b1_complex | | 0.196 | 0 | 0.007 | 0 |
| COL6A3_integrin_a10b1_complex | | 0 | 0 | 0.01 | 0.003 |
| COL6A5_integrin_a10b1_complex | | 0 | 0 | 0.007 | 0 |
| COL6A6_integrin_a10b1_complex | | 0.003 | 0 | 0.008 | 0.001 |
| COL7A1_integrin_a10b1_complex | | 0 | 0.003 | 0.009 | 0.002 |
| COL8A1_integrin_a10b1_complex | | 0 | 0 | 0.007 | 0 |
| COL8A2_integrin_a10b1_complex | | 0 | 0 | 0.017 | 0.01 |
| COL9A1_integrin_a10b1_complex | | 0 | 0 | 0.008 | 0.002 |
| COL9A2_integrin_a10b1_complex | | 0.003 | 0.004 | 0.102 | 0.095 |
| COL9A3_integrin_a10b1_complex | | 0 | 0 | 0.082 | 0.076 |
| FN1_integrin_a10b1_complex | | 0 | 0 | 2.778 | 2.771 |
| COL10A1_integrin_a11b1_complex | | 0 | 0 | 0 | 0 |
| COL11A1_integrin_a11b1_complex | | 0.001 | 0 | 0 | 0 |
| COL11A2_integrin_a11b1_complex | | 0 | 0.001 | 0 | 0 |
| COL12A1_integrin_a11b1_complex | | 0 | 0 | 0 | 0 |
| COL13A1_integrin_a11b1_complex | | 0 | 0 | 0 | 0 |
| COL14A1_integrin_a11b1_complex | | 0 | 0 | 0 | 0 |
| COL15A1_integrin_a11b1_complex | | 0 | 0 | 0 | 0 |
| COL16A1_integrin_a11b1_complex | | 0 | 0 | 0 | 0 |
| COL17A1_integrin_a11b1_complex | | 0 | 0 | 0 | 0 |
| COL18A1_integrin_a11b1_complex | | 0 | 0 | 0 | 0 |
| COL19A1_integrin_a11b1_complex | | 0 | 0 | 0 | 0 |
| COL1A1_integrin_a11b1_complex | | 0.011 | 0 | 0 | 0 |
| COL20A1_integrin_a11b1_complex | | 0 | 0 | 0 | 0 |
| COL21A1_integrin_a11b1_complex | | 0 | 0 | 0 | 0 |
| COL22A1_integrin_a11b1_complex | | 0 | 0 | 0 | 0 |
| COL24A1_integrin_a11b1_complex | | 0 | 0 | 0 | 0 |
| COL26A1_integrin_a11b1_complex | | 0 | 0 | 0 | 0 |
| COL27A1_integrin_a11b1_complex | | 0 | 0 | 0 | 0 |
| COL28A1_integrin_a11b1_complex | | 0 | 0 | 0 | 0 |
| COL2A1_integrin_a11b1_complex | | 0.001 | 0 | 0 | 0 |
| COL3A1_integrin_a11b1_complex | | 0 | 0 | 0 | 0 |
| COL4A2_integrin_a11b1_complex | | 0 | 0 | 0 | 0 |
| COL4A3_integrin_a11b1_complex | | 0.002 | 0 | 0 | 0 |
| COL4A4_integrin_a11b1_complex | | 0 | 0 | 0 | 0 |
| COL4A5_integrin_a11b1_complex | | 0 | 0 | 0 | 0 |
| COL4A6_integrin_a11b1_complex | | 0 | 0 | 0 | 0 |
| COL5A1_integrin_a11b1_complex | | 0.026 | 0.001 | 0 | 0 |
| COL5A2_integrin_a11b1_complex | | 0 | 0 | 0 | 0 |
| COL5A3_integrin_a11b1_complex | | 0.007 | 0 | 0 | 0 |
| COL6A1_integrin_a11b1_complex | | 0.011 | 0 | 0 | 0 |
| COL6A2_integrin_a11b1_complex | | 0.194 | 0 | 0 | 0 |
| COL6A3_integrin_a11b1_complex | | 0 | 0 | 0 | 0 |
| COL6A5_integrin_a11b1_complex | | 0 | 0 | 0 | 0 |
| COL6A6_integrin_a11b1_complex | | 0.002 | 0 | 0 | 0 |
| COL7A1_integrin_a11b1_complex | | 0 | 0.001 | 0 | 0 |
| COL8A1_integrin_a11b1_complex | | 0 | 0 | 0 | 0 |
| COL8A2_integrin_a11b1_complex | | 0 | 0 | 0 | 0 |
| COL9A1_integrin_a11b1_complex | | 0 | 0 | 0 | 0 |
| COL9A2_integrin_a11b1_complex | | 0.001 | 0.002 | 0 | 0 |
| COL9A3_integrin_a11b1_complex | | 0 | 0 | 0 | 0 |
| FN1_integrin_a11b1_complex | | 0 | 0 | 0 | 0 |
| COL3A1_ADGRG1 | | 0 | 0 | 0.076 | 0.005 |
| GAST_ADGRG1 | | 0 | 0 | 0.077 | 0.007 |
| TGM2_ADGRG1 | | 0 | 0 | 0.213 | 0.142 |
| COL4A2_ADGRG6 | | 0 | 0 | 0 | 0 |
| COL4A3_ADGRG6 | | 0.102 | 0.1 | 0 | 0 |
| COL4A4_ADGRG6 | | 0 | 0.1 | 0 | 0 |
| COL4A5_ADGRG6 | | 0 | 0 | 0 | 0 |
| COL4A6_ADGRG6 | | 0 | 0 | 0 | 0 |
| LAMA2_ADGRG6 | | 0.111 | 0 | 0 | 0 |
| PRNP_ADGRG6 | | 0.809 | 1.066 | 0 | 0 |
| DSC1_DSG2 | | 0 | 0 | 0 | 0 |
| DSC2_DSG2 | | 0 | 0 | 0 | 0 |
| DSG1_DSC1 | | 0.002 | 0 | 0 | 0 |
| DSG1_DSC2 | | 0.042 | 0 | 0 | 0 |
| DSG1_DSC3 | | 0.002 | 0 | 0 | 0 |
| DSG2_DSC3 | | 0 | 0 | 0 | 0 |
| DAG1_CELSR3 | | 0.028 | 0.009 | 0.254 | 0.253 |
| DAG1_NRXN3 | | 0.07 | 0.051 | 0 | 0 |
| CLSTN1_NRXN3 | | 0.176 | 0.163 | 0 | 0 |
| CLSTN2_NRXN3 | | 0 | 0 | 0 | 0 |
| CLSTN3_NRXN3 | | 0.186 | 0.235 | 0 | 0 |
| LRRTM2_NRXN3 | | 0 | 0 | 0 | 0 |
| LRRTM3_NRXN3 | | 0 | 0 | 0 | 0 |
| LRRTM4_NRXN3 | | 0.051 | 0 | 0 | 0 |
| NLGN1_NRXN3 | | 0.053 | 0 | 0 | 0 |
| NLGN2_NRXN3 | | 0.055 | 0.058 | 0 | 0 |
| NLGN3_NRXN3 | | 0.054 | 0 | 0 | 0 |
| NLGN4X_NRXN3 | | 0 | 0 | 0 | 0 |
| NLGN4Y_NRXN3 | | 0 | 0 | 0 | 0 |
| fibrinogen_integrin_a2Bb3_complex | | 0 | 0 | 0 | 0 |
| FN1_integrin_a2Bb3_complex | | 0 | 0 | 0 | 0 |
| L1CAM_integrin_a2Bb3_complex | | 0.006 | 0.008 | 0 | 0 |
| F2_integrin_a2Bb3_complex | | 0 | 0 | 0 | 0 |
| THBS1_integrin_a2Bb3_complex | | 0.046 | 0.006 | 0 | 0 |
| VTN_integrin_a2Bb3_complex | | 0 | 0 | 0 | 0 |
| CD40LG_integrin_a2Bb3_complex | | 0.568 | 0.315 | 0 | 0 |
| PLG_integrin_a2Bb3_complex | | 0 | 0 | 0 | 0 |
| fibrinogen_integrin_aMb2_complex | | 0 | 0 | 5.503 | 5.483 |
| ICAM1_integrin_aMb2_complex | | 0.672 | 0.464 | 0.483 | 0.464 |
| JAM3_integrin_aMb2_complex | | 0.01 | 0.019 | 0.021 | 0.002 |
| F10_integrin_aMb2_complex | | 0 | 0 | 0.606 | 0.587 |
| C3_integrin_aMb2_complex | | 0.009 | 0 | 6.654 | 6.635 |
| FCER2_integrin_aMb2_complex | | 0 | 0 | 0.02 | 0.001 |
| THY1_integrin_aMb2_complex | | 0.005 | 0.003 | 0.02 | 0 |
| GP1BA_integrin_aMb2_complex | | 0.002 | 0 | 0.02 | 0.001 |
| fibrinogen_integrin_aXb2_complex | | 0 | 0 | 0 | 0 |
| ICAM1_integrin_aXb2_complex | | 0.672 | 0.464 | 0 | 0 |
| FCER2_integrin_aXb2_complex | | 0 | 0 | 0 | 0 |
| THY1_integrin_aXb2_complex | | 0.005 | 0.003 | 0 | 0 |
| FN1_integrin_a3b1_complex | | 0 | 0 | 2.786 | 2.78 |
| LAMA3_integrin_a3b1_complex | | 0.028 | 0 | 0.025 | 0.019 |
| THBS1_integrin_a3b1_complex | | 0.061 | 0.022 | 0.303 | 0.297 |
| CSPG4_integrin_a3b1_complex | | 0.019 | 0 | 0.015 | 0.009 |
| FN1_integrin_a4b1_complex | | 0 | 0 | 2.98 | 2.822 |
| JAM2_integrin_a4b1_complex | | 0 | 0 | 0.209 | 0.051 |
| SPP1_integrin_a4b1_complex | | 0.001 | 0.007 | 4.27 | 4.113 |
| TNC_integrin_a4b1_complex | | 0 | 0 | 0.21 | 0.053 |
| VCAM1_integrin_a4b1_complex | | 0.002 | 0 | 0.294 | 0.137 |
| PLA2G2A_integrin_a4b1_complex | | 0 | 0 | 1.164 | 1.007 |
| PLAUR_integrin_a4b1_complex | | 0.14 | 0.089 | 0.218 | 0.061 |
| FN1_integrin_a4b7_complex | | 0 | 0 | 3.377 | 3.246 |
| VCAM1_integrin_a4b7_complex | | 0.002 | 0 | 0.691 | 0.56 |
| MADCAM1_integrin_a4b7_complex | | 0 | 0 | 0.616 | 0.485 |
| FN1_integrin_a5b1_complex | | 0 | 0 | 2.85 | 2.822 |
| L1CAM_integrin_a5b1_complex | | 0.204 | 0.206 | 0.079 | 0.051 |
| PLA2G2A_integrin_a5b1_complex | | 0 | 0 | 1.035 | 1.007 |
| CD40LG_integrin_a5b1_complex | | 0.765 | 0.512 | 0.079 | 0.051 |
| FBN1_integrin_a5b1_complex | | 0 | 0 | 0.095 | 0.067 |
| FN1_integrin_a8b1_complex | | 0 | 0 | 2.772 | 0 |
| TNC_integrin_a8b1_complex | | 0 | 0 | 0.002 | 0 |
| FN1_integrin_aVb1_complex | | 0 | 0 | 2.822 | 2.772 |
| L1CAM_integrin_aVb1_complex | | 0.281 | 0.283 | 0.051 | 0.001 |
| VTN_integrin_aVb1_complex | | 0 | 0 | 37.282 | 37.232 |
| FN1_integrin_aVb3_complex | | 0 | 0 | 0 | 0 |
| L1CAM_integrin_aVb3_complex | | 0.008 | 0.01 | 0 | 0 |
| LAMC1_integrin_aVb3_complex | | 0 | 0 | 0 | 0 |
| SPP1_integrin_aVb3_complex | | 0.005 | 0.01 | 0 | 0 |
| F2_integrin_aVb3_complex | | 0 | 0 | 0 | 0 |
| TNC_integrin_aVb3_complex | | 0 | 0 | 0 | 0 |
| THBS1_integrin_aVb3_complex | | 0.048 | 0.008 | 0 | 0 |
| VTN_integrin_aVb3_complex | | 0 | 0 | 0 | 0 |
| FCER2_integrin_aVb3_complex | | 0 | 0 | 0 | 0 |
| FGF1_integrin_aVb3_complex | | 0 | 0 | 0 | 0 |
| FGF2_integrin_aVb3_complex | | 0 | 0 | 0 | 0 |
| IGF1_integrin_aVb3_complex | | 0 | 0 | 0 | 0 |
| PLAUR_integrin_aVb3_complex | | 0.144 | 0.093 | 0 | 0 |
| THY1_integrin_aVb3_complex | | 0.009 | 0.007 | 0 | 0 |
| VWF_integrin_aVb3_complex | | 0 | 0.005 | 0 | 0 |
| MMP2_integrin_aVb3_complex | | 0 | 0 | 0 | 0 |
| OMD_integrin_aVb3_complex | | 0 | 0 | 0 | 0 |
| FN1_integrin_aVb5_complex | | 0 | 0 | 2.773 | 0 |
| GJA1_GJA1 | | 0 | 0 | 0 | 0 |
| GJA3_GJA1 | | 0 | 0.002 | 0 | 0 |
| GJC1_GJA1 | | 0 | 0.002 | 0 | 0 |
| GJA1_GJA5 | | 0 | 0 | 0 | 0 |
| GJA3_GJA5 | | 0 | 0.001 | 0 | 0 |
| GJA5_GJA5 | | 0 | 0 | 0 | 0 |
| GJC1_GJA5 | | 0 | 0.001 | 0 | 0 |
| GJA3_GJA3 | | 0 | 0.001 | 0 | 0.001 |
| GJA3_GJC1 | | 0 | 0.005 | 0 | 0.001 |
| GJC1_GJC1 | | 0 | 0.005 | 0 | 0.005 |
| ICAM1_ITGAL | | 0.679 | 0.471 | 0.825 | 0.761 |
| ICAM1_integrin_aLb2_complex | | 0.672 | 0.465 | 0.825 | 0.761 |
| ICAM2_integrin_aLb2_complex | | 0.579 | 0.396 | 0.409 | 0.345 |
| ICAM3_integrin_aLb2_complex | | 1.424 | 1.385 | 0.517 | 0.453 |
| ICAM4_integrin_aLb2_complex | | 0.008 | 0 | 0.366 | 0.302 |
| F11R_integrin_aLb2_complex | | 0.053 | 0.036 | 0.687 | 0.623 |
| ICAM1_SPN | | 0.672 | 0.464 | 0.971 | 0.983 |
| ICAM3_integrin_aDb2_complex | | 1.424 | 1.384 | 0 | 0 |
| VCAM1_integrin_aDb2_complex | | 0.001 | 0 | 0 | 0 |
| JAM2_JAM3 | | 0 | 0 | 0.01 | 0.019 |
| JAM3_JAM3 | | 0.011 | 0.02 | 0.011 | 0.02 |
| L1CAM_pL1:Ezrin | | 0.004 | 0.006 | 0.004 | 0.006 |
| L1CAM_integrin_a9b1_complex | | 0.009 | 0.011 | 0 | 0 |
| SPP1_integrin_a9b1_complex | | 0.006 | 0.012 | 0 | 0 |
| TNC_integrin_a9b1_complex | | 0 | 0 | 0 | 0 |
| VCAM1_integrin_a9b1_complex | | 0.007 | 0 | 0 | 0 |
| L1CAM_L1CAM | | 0.004 | 0.006 | 0.004 | 0.006 |
| CHL1_L1CAM | | 0 | 0 | 0.01 | 0.012 |
| LAMC1_integrin_a6b1_complex | | 0 | 0 | 0.52 | 0.395 |
| LAMC1_integrin_a7b1_complex | | 0 | 0 | 0 | 0 |
| NECTIN1_CADM3 | | 0.008 | 0.016 | 0 | 0 |
| NECTIN1_NECTIN4 | | 0.009 | 0.017 | 0 | 0 |
| NECTIN2_TIGIT | | 0 | 0 | 0.947 | 0.946 |
| NECTIN3_TIGIT | | 0.041 | 0.028 | 0.411 | 0.409 |
| PVR_TIGIT | | 0 | 0 | 0.129 | 0.128 |
| F2_F2R | | 0 | 0 | 2.48 | 2.519 |
| F2_F2RL2 | | 0 | 0 | 2.427 | 0 |
| F2_F2RL3 | | 0 | 0 | 0 | 0 |
| CTSG_F2RL3 | | 0 | 0 | 0 | 0 |
| F2_Glycoprotein_Ib_complex | | 0 | 0 | 0 | 0 |
| VWF_Glycoprotein_Ib_complex | | 0 | 0.001 | 0 | 0 |
| F2_THBD | | 0 | 0 | 0 | 0 |
| TNC_integrin_aVb6_complex | | 0 | 0 | 0 | 0 |
| TGFB1_integrin_aVb6_complex | | 3.452 | 4.925 | 0 | 0 |
| TGFB3_integrin_aVb6_complex | | 0.009 | 0 | 0 | 0 |
| THBS1_CD36 | | 0.057 | 0.017 | 0 | 0 |
| Adenosine_byNT5E_and_SLC29A1_ADORA1 | | 0.007 | 0 | 0 | 0 |
| Adenosine_byNT5E_and_SLC29A2_ADORA1 | | 0.017 | 0 | 0 | 0 |
| Adenosine_byNT5E_and_SLC29A3_ADORA1 | | 0.017 | 0 | 0 | 0 |
| Adenosine_byNT5E_and_SLC29A4_ADORA1 | | 0 | 0 | 0 | 0 |
| ENTPD1_ADORA1 | | 0.012 | 0.008 | 0 | 0 |
| Adenosine_byNT5E_and_SLC29A1_ADORA2A | | 0.004 | 0 | 0.329 | 0.258 |
| Adenosine_byNT5E_and_SLC29A2_ADORA2A | | 0.015 | 0 | 0.187 | 0.116 |
| Adenosine_byNT5E_and_SLC29A3_ADORA2A | | 0.015 | 0 | 0.213 | 0.142 |
| Adenosine_byNT5E_and_SLC29A4_ADORA2A | | 0 | 0 | 0.244 | 0.173 |
| ENTPD1_ADORA2A | | 0.009 | 0.006 | 0.172 | 0.101 |
| Adenosine_byNT5E_and_SLC29A1_ADORA2B | | 0.007 | 0 | 0 | 0 |
| Adenosine_byNT5E_and_SLC29A2_ADORA2B | | 0.017 | 0 | 0 | 0 |
| Adenosine_byNT5E_and_SLC29A3_ADORA2B | | 0.017 | 0 | 0 | 0 |
| Adenosine_byNT5E_and_SLC29A4_ADORA2B | | 0 | 0 | 0 | 0 |
| ENTPD1_ADORA2B | | 0.011 | 0.008 | 0 | 0 |
| Adenosine_byNT5E_and_SLC29A1_ADORA3 | | 0 | 0 | 0 | 0 |
| Adenosine_byNT5E_and_SLC29A2_ADORA3 | | 0.011 | 0 | 0 | 0 |
| Adenosine_byNT5E_and_SLC29A3_ADORA3 | | 0.011 | 0 | 0 | 0 |
| Adenosine_byNT5E_and_SLC29A4_ADORA3 | | 0 | 0 | 0 | 0 |
| ENTPD1_ADORA3 | | 0.005 | 0.002 | 0 | 0 |
| Adrenaline_byPNMT_and_SLC18A2_ADRA1A | | 0 | 0 | 0 | 0 |
| Epinephrine_byPNMT_ADRA1A | | 0 | 0.024 | 0 | 0 |
| Noradrenaline_byDBH_and_SLC18A2_ADRA1A | | 0 | 0 | 0 | 0 |
| Noradrenaline_byDBH_and_SLC6A2_ADRA1A | | 0 | 0 | 0 | 0 |
| Adrenaline_byPNMT_and_SLC18A2_ADRA1B | | 0 | 0 | 0 | 0 |
| Epinephrine_byPNMT_ADRA1B | | 0 | 0.006 | 0 | 0 |
| Noradrenaline_byDBH_and_SLC18A2_ADRA1B | | 0 | 0 | 0 | 0 |
| Noradrenaline_byDBH_and_SLC6A2_ADRA1B | | 0 | 0 | 0 | 0 |
| Adrenaline_byPNMT_and_SLC18A2_ADRA1D | | 0 | 0 | 0 | 0 |
| Epinephrine_byPNMT_ADRA1D | | 0 | 0.002 | 0 | 0 |
| Noradrenaline_byDBH_and_SLC18A2_ADRA1D | | 0 | 0 | 0 | 0 |
| Noradrenaline_byDBH_and_SLC6A2_ADRA1D | | 0 | 0 | 0 | 0 |
| Adrenaline_byPNMT_and_SLC18A2_ADRA2A | | 0 | 0 | 0 | 0 |
| Epinephrine_byPNMT_ADRA2A | | 0 | 0.006 | 0 | 0 |
| Noradrenaline_byDBH_and_SLC18A2_ADRA2A | | 0 | 0 | 0 | 0 |
| Noradrenaline_byDBH_and_SLC6A2_ADRA2A | | 0 | 0 | 0 | 0 |
| Adrenaline_byPNMT_and_SLC18A2_ADRA2B | | 0 | 0 | 0.054 | 0.022 |
| Epinephrine_byPNMT_ADRA2B | | 0 | 0.002 | 0.054 | 0.022 |
| Noradrenaline_byDBH_and_SLC18A2_ADRA2B | | 0 | 0 | 0.052 | 0.021 |
| Noradrenaline_byDBH_and_SLC6A2_ADRA2B | | 0 | 0 | 0.052 | 0.02 |
| Adrenaline_byPNMT_and_SLC18A2_ADRA2C | | 0 | 0 | 0 | 0 |
| Epinephrine_byPNMT_ADRA2C | | 0 | 0.015 | 0 | 0 |
| Noradrenaline_byDBH_and_SLC18A2_ADRA2C | | 0 | 0 | 0 | 0 |
| Noradrenaline_byDBH_and_SLC6A2_ADRA2C | | 0 | 0 | 0 | 0 |
| Adrenaline_byPNMT_and_SLC18A2_ADRB1 | | 0 | 0 | 0.005 | 0.003 |
| Epinephrine_byPNMT_ADRB1 | | 0 | 0.003 | 0.005 | 0.003 |
| Noradrenaline_byDBH_and_SLC18A2_ADRB1 | | 0 | 0 | 0.003 | 0.002 |
| Noradrenaline_byDBH_and_SLC6A2_ADRB1 | | 0 | 0 | 0.003 | 0.001 |
| Adrenaline_byPNMT_and_SLC18A2_ADRB2 | | 0 | 0 | 0.575 | 0.511 |
| Epinephrine_byPNMT_ADRB2 | | 0 | 0.016 | 0.575 | 0.511 |
| Noradrenaline_byDBH_and_SLC18A2_ADRB2 | | 0 | 0 | 0.574 | 0.51 |
| Noradrenaline_byDBH_and_SLC6A2_ADRB2 | | 0 | 0 | 0.573 | 0.509 |
| ADM_RAMP3_complex | | 0.072 | 0.003 | 0 | 0 |
| ADM2_RAMP3_complex | | 0 | 0.008 | 0 | 0 |
| ADM_RAMP3 | | 0.072 | 0.003 | 0 | 0 |
| ADM2_RAMP2_complex | | 0 | 0.017 | 0 | 0 |
| AGRP_MC2R | | 0 | 0 | 0 | 0 |
| POMC_MC2R | | 0.031 | 0.063 | 0 | 0 |
| AGRP_MC4R | | 0 | 0 | 0 | 0 |
| POMC_MC4R | | 0.032 | 0.063 | 0 | 0 |
| AGRP_MC5R | | 0 | 0 | 0 | 0 |
| POMC_MC5R | | 0.032 | 0.064 | 0 | 0 |
| ASIP_MC1R | | 0.003 | 0 | 0.011 | 0.009 |
| POMC_MC1R | | 0.034 | 0.065 | 0.006 | 0.004 |
| AGRN_LRP4_MUSK_complex | | 0 | 0.001 | 0 | 0 |
| AGRN_PTPRS | | 0 | 0.001 | 0 | 0 |
| LRRC4B_PTPRS | | 0 | 0 | 0 | 0 |
| LRFN4_PTPRS | | 0.039 | 0.016 | 0 | 0 |
| LRFN5_PTPRS | | 0 | 0 | 0 | 0 |
| LRRTM4_PTPRS | | 0.002 | 0 | 0 | 0 |
| SLITRK1_PTPRS | | 0 | 0 | 0 | 0 |
| SLITRK5_PTPRS | | 0.002 | 0 | 0 | 0 |
| SLITRK6_PTPRS | | 0 | 0 | 0 | 0 |
| IAPP_CALCR | | 0 | 0 | 0 | 0 |
| CALCA_CALCR | | 0 | 0 | 0 | 0 |
| CALCB_CALCR | | 0.013 | 0.015 | 0 | 0 |
| IAPP_AMY1_receptor | | 0 | 0 | 0 | 0 |
| IAPP_AMY2_receptor | | 0 | 0 | 0 | 0 |
| IAPP_AMY3_receptor | | 0 | 0 | 0 | 0 |
| APP_CD74 | | 0.149 | 0.136 | 3.725 | 1.013 |
| APP_FPR2 | | 0.014 | 0.001 | 0 | 0 |
| ANXA1_FPR2 | | 3.256 | 2.707 | 0 | 0 |
| CCL23_FPR2 | | 0 | 0.001 | 0 | 0 |
| LipoxinA4_byALOX12_FPR2 | | 0 | 0 | 0 | 0 |
| LipoxinA4_byALOX5_FPR2 | | 0 | 0 | 0 | 0 |
| TAFA5_FPR2 | | 0 | 0 | 0 | 0 |
| SAA1_FPR2 | | 0 | 0 | 0 | 0 |
| APP_PLXNA4 | | 0.016 | 0.003 | 0.878 | 0 |
| APLP2_PLXNA4 | | 0.116 | 0.005 | 1.131 | 0 |
| APP_SORL1 | | 0.063 | 0.05 | 1.103 | 1.185 |
| APP_TNFRSF21 | | 0.073 | 0.06 | 0 | 0 |
| PI16_TNFRSF21 | | 0.066 | 0.059 | 0 | 0 |
| APP_TREM2_receptor | | 0.014 | 0.001 | 0 | 0 |
| APOA1_TREM2_receptor | | 0 | 0 | 0 | 0 |
| APOA2_TREM2_receptor | | 0.049 | 0.001 | 0 | 0 |
| APOB_TREM2_receptor | | 0.005 | 0.003 | 0 | 0 |
| APOE_TREM2_receptor | | 0 | 0 | 0 | 0 |
| CLU_TREM2_receptor | | 0.001 | 0 | 0 | 0 |
| APLP2_PIGR | | 0.293 | 0.182 | 0 | 0 |
| Desoxycorticosterone_byCYP21A2_NR3C2 | | 0 | 0 | 0.108 | 0.15 |
| Dihydrotestosterone_bySRD5A1_AR | | 0.223 | 0.196 | 0 | 0 |
| Dihydrotestosterone_bySRD5A2_AR | | 0 | 0 | 0 | 0 |
| Dihydrotestosterone_bySRD5A3_AR | | 0.221 | 0.219 | 0 | 0 |
| Androstenedione_byCYP17A1_AR | | 0 | 0 | 0 | 0 |
| Testosterone_byHSD17B12_AR | | 0.338 | 0.269 | 0 | 0 |
| Testosterone_byHSD17B3_AR | | 0 | 0 | 0 | 0 |
| Testosterone_byAKR1D1_AR | | 0 | 0 | 0 | 0 |
| Androsterone_byHSD17B6_NR1H4 | | 0 | 0 | 0 | 0 |
| 22Hydroxycholesterol_byCYP11A1_NR1H4 | | 0 | 0 | 0 | 0 |
| 22Hydroxycholesterol_byCYP3A4_NR1H4 | | 0 | 0 | 0 | 0 |
| Calcitriol_byCYP27B1_VDR | | 0.012 | 0.014 | 0.018 | 0.015 |
| Estradiol_byCYP19A1_ESR1 | | 0 | 0 | 0.008 | 0 |
| Dehydroepiandrosterone_bySTS_ESR1 | | 0.133 | 0.054 | 0.034 | 0 |
| Estradiol_byHSD17B1_ESR1 | | 0.017 | 0 | 0.032 | 0 |
| Estradiol_byCYP19A1_ESR2 | | 0 | 0 | 0.038 | 0.033 |
| Estradiol_byHSD17B1_ESR2 | | 0.008 | 0 | 0.062 | 0.057 |
| Estradiol_byCYP19A1_GPER1 | | 0 | 0 | 0 | 0.009 |
| Estradiol_byHSD17B1_GPER1 | | 0.048 | 0 | 0 | 0.033 |
| Estradiol_byCYP19A1_NR1I2 | | 0 | 0 | 0 | 0.007 |
| Pregnenolone_byCYP11A1_NR1I2 | | 0 | 0 | 0 | 0.013 |
| Dehydroepiandrosterone_bySTS_NR1I2 | | 0.161 | 0.083 | 0 | 0.034 |
| Estradiol_byHSD17B1_NR1I2 | | 0.045 | 0 | 0 | 0.031 |
| ANGPT1_TEK | | 0 | 0 | 0 | 0 |
| ANGPT2_TEK | | 0.004 | 0 | 0 | 0 |
| ANGPT4_TEK | | 0 | 0 | 0 | 0 |
| AGT_AGTR1 | | 0 | 0.226 | 0 | 0 |
| AGT_AGTR2 | | 0 | 0.029 | 0 | 0 |
| ANXA1_FPR1 | | 3.256 | 2.708 | 0 | 0 |
| CTSG_FPR1 | | 0 | 0 | 0 | 0 |
| TAFA4_FPR1 | | 0.002 | 0 | 0 | 0 |
| ANXA1_FPR3 | | 3.256 | 2.707 | 0 | 0 |
| HEBP1_FPR3 | | 0.053 | 0.013 | 0 | 0 |
| APELA_APLNR | | 0 | 0 | 0 | 0 |
| APLN_APLNR | | 0 | 0 | 0 | 0 |
| APOA1_ABCA1 | | 0 | 0 | 33.975 | 33.968 |
| APOA1_CUBN_AMN_complex | | 0 | 0 | 33.969 | 33.968 |
| APOB_APOBR | | 0.005 | 0.003 | 3.978 | 3.954 |
| 2arachidonoylglycerol_byDAGLA_CNR1 | | 0 | 0 | 0 | 0 |
| 2arachidonoylglycerol_byDAGLB_CNR1 | | 0.03 | 0.034 | 0 | 0 |
| 2arachidonoylglycerol_byDAGLA_CNR2 | | 0 | 0 | 0.015 | 0.009 |
| 2arachidonoylglycerol_byDAGLB_CNR2 | | 0.026 | 0.03 | 0.038 | 0.032 |
| 2arachidonoylglycerol_byDAGLA_GPR55 | | 0 | 0 | 0.079 | 0.038 |
| 2arachidonoylglycerol_byDAGLB_GPR55 | | 0.025 | 0.03 | 0.102 | 0.062 |
| NGF_NGFR | | 0 | 0 | 0.024 | 0.014 |
| BDNF_NGFR | | 0 | 0 | 0.025 | 0.015 |
| NTF3_NGFR | | 0 | 0 | 0.021 | 0.011 |
| CD80_NGFR | | 0.008 | 0 | 0.021 | 0.011 |
| NGF_NTRK1 | | 0 | 0 | 0.038 | 0.024 |
| NTF3_NTRK1 | | 0 | 0 | 0.035 | 0.021 |
| NGF_SORT1 | | 0 | 0 | 0.003 | 0 |
| BDNF_SORT1 | | 0 | 0 | 0.004 | 0 |
| NTS_SORT1 | | 0.127 | 0 | 0.456 | 0 |
| LRPAP1_SORT1 | | 0.413 | 0.399 | 0.557 | 0 |
| BMP10_ACVL1_ACVR2A | | 0 | 0 | 0 | 0 |
| BMP10_ACVL1_BMPR2 | | 0 | 0 | 0 | 0 |
| BMP2_BMPR1B_BMPR2 | | 0 | 0 | 0 | 0 |
| BMP4_BMPR1B_BMPR2 | | 0.002 | 0 | 0 | 0 |
| BMP6_BMPR1B_BMPR2 | | 0 | 0 | 0 | 0 |
| BMP7_BMPR1B_BMPR2 | | 0.003 | 0 | 0 | 0 |
| BMP8A_BMPR1B_BMPR2 | | 0 | 0.002 | 0 | 0 |
| GDF5_BMPR1B_BMPR2 | | 0 | 0 | 0 | 0 |
| GDF6_BMPR1B_BMPR2 | | 0.004 | 0 | 0 | 0 |
| GDF7_BMPR1B_BMPR2 | | 0 | 0 | 0 | 0 |
| BMP2_BMR1A_ACR2A | | 0 | 0 | 0.165 | 0.159 |
| BMP4_BMR1A_ACR2A | | 0.051 | 0 | 0.062 | 0.057 |
| BMP6_BMR1A_ACR2A | | 0 | 0 | 0.006 | 0.001 |
| BMP7_BMR1A_ACR2A | | 0.052 | 0 | 0.006 | 0.001 |
| BMP8A_BMR1A_ACR2A | | 0 | 0.051 | 0.009 | 0.004 |
| GDF5_BMR1A_ACR2A | | 0 | 0 | 0.007 | 0.001 |
| GDF6_BMR1A_ACR2A | | 0.053 | 0 | 0 | 0 |
| GDF7_BMR1A_ACR2A | | 0 | 0 | 0.013 | 0.007 |
| BMP2_BMR1B_AVR2A | | 0 | 0 | 0 | 0 |
| BMP4_BMR1B_AVR2A | | 0.002 | 0 | 0 | 0 |
| BMP6_BMR1B_AVR2A | | 0 | 0 | 0 | 0 |
| BMP7_BMR1B_AVR2A | | 0.003 | 0 | 0 | 0 |
| BMP8A_BMR1B_AVR2A | | 0 | 0.002 | 0 | 0 |
| GDF5_BMR1B_AVR2A | | 0 | 0 | 0 | 0 |
| GDF6_BMR1B_AVR2A | | 0.004 | 0 | 0 | 0 |
| GDF7_BMR1B_AVR2A | | 0 | 0 | 0 | 0 |
| BMP2_BMR1A_AVR2B | | 0 | 0 | 0.163 | 0.162 |
| BMP4_BMR1A_AVR2B | | 0.047 | 0 | 0.06 | 0.06 |
| BMP6_BMR1A_AVR2B | | 0 | 0 | 0.004 | 0.004 |
| BMP7_BMR1A_AVR2B | | 0.049 | 0 | 0.004 | 0.004 |
| BMP8A_BMR1A_AVR2B | | 0 | 0.048 | 0.007 | 0.007 |
| GDF5_BMR1A_AVR2B | | 0 | 0 | 0.005 | 0.004 |
| GDF7_BMR1A_AVR2B | | 0 | 0 | 0.011 | 0.01 |
| BMP2_BMR1B_AVR2B | | 0 | 0 | 0 | 0 |
| BMP4_BMR1B_AVR2B | | 0.002 | 0 | 0 | 0 |
| BMP6_BMR1B_AVR2B | | 0 | 0 | 0 | 0 |
| BMP7_BMR1B_AVR2B | | 0.003 | 0 | 0 | 0 |
| BMP8A_BMR1B_AVR2B | | 0 | 0.002 | 0 | 0 |
| GDF5_BMR1B_AVR2B | | 0 | 0 | 0 | 0 |
| GDF6_BMR1B_AVR2B | | 0.004 | 0 | 0 | 0 |
| GDF7_BMR1B_AVR2B | | 0 | 0 | 0 | 0 |
| BMP2_BMPR1A_BMPR2 | | 0 | 0 | 0.181 | 0.179 |
| BMP4_BMPR1A_BMPR2 | | 0.082 | 0 | 0.079 | 0.076 |
| BMP6_BMPR1A_BMPR2 | | 0 | 0 | 0.023 | 0.02 |
| BMP7_BMPR1A_BMPR2 | | 0.084 | 0 | 0.023 | 0.02 |
| BMP8A_BMPR1A_BMPR2 | | 0 | 0.083 | 0.026 | 0.023 |
| GDF6_BMPR1A_BMPR2 | | 0.084 | 0 | 0 | 0 |
| GDF7_BMPR1A_BMPR2 | | 0 | 0 | 0.029 | 0.027 |
| BMP6_ACVR_1A2A_receptor | | 0 | 0 | 0.006 | 0.001 |
| BMP7_ACVR_1A2A_receptor | | 0.052 | 0 | 0.006 | 0.001 |
| BMP8A_ACVR_1A2A_receptor | | 0 | 0.051 | 0.009 | 0.004 |
| Activin_ligand_ab_ACVR_1A2A_receptor | | 0 | 0 | 0.085 | 0.08 |
| INHA_ACVR_1A2A_receptor | | 0 | 0 | 0.089 | 0.084 |
| Inhibin_ligand_A_ACVR_1A2A_receptor | | 0 | 0 | 0.089 | 0.084 |
| Inhibin_ligand_B_ACVR_1A2A_receptor | | 0 | 0 | 0.085 | 0.08 |
| BMP6_ACVR_1A2B_receptor | | 0 | 0 | 0.004 | 0.004 |
| BMP7_ACVR_1A2B_receptor | | 0.049 | 0 | 0.004 | 0.004 |
| BMP8A_ACVR_1A2B_receptor | | 0 | 0.048 | 0.007 | 0.007 |
| Activin_ligand_ab_ACVR_1A2B_receptor | | 0 | 0 | 0.083 | 0.083 |
| INHA_ACVR_1A2B_receptor | | 0 | 0 | 0.087 | 0.087 |
| Inhibin_ligand_A_ACVR_1A2B_receptor | | 0 | 0 | 0.087 | 0.087 |
| Inhibin_ligand_B_ACVR_1A2B_receptor | | 0 | 0 | 0.083 | 0.083 |
| BMP6_ACVR1_BMPR2 | | 0 | 0 | 0.028 | 0.011 |
| BMP7_ACVR1_BMPR2 | | 0.103 | 0 | 0.028 | 0.011 |
| BMP8A_ACVR1_BMPR2 | | 0 | 0.102 | 0.031 | 0.014 |
| BMPR1B_BMPR2_BMPR1A | | 0 | 0 | 0.023 | 0.021 |
| BDNF_NTRK2 | | 0 | 0 | 0.017 | 0.015 |
| NTN4_NTRK2 | | 0.118 | 0.101 | 0.059 | 0.057 |
| NTF3_NTRK2 | | 0 | 0 | 0.014 | 0.011 |
| CALCA_RAMP1_complex | | 0 | 0 | 0 | 0 |
| CALCB_RAMP1_complex | | 0.022 | 0.023 | 0 | 0 |
| CLSTN1_NRXN1 | | 0.129 | 0.117 | 0.119 | 0 |
| CLSTN2_NRXN1 | | 0 | 0 | 0.016 | 0 |
| CLSTN3_NRXN1 | | 0.139 | 0.188 | 0.094 | 0 |
| LRRTM2_NRXN1 | | 0 | 0 | 0.001 | 0 |
| LRRTM3_NRXN1 | | 0 | 0 | 0.003 | 0 |
| LRRTM4_NRXN1 | | 0.005 | 0 | 0.007 | 0 |
| NLGN1_NRXN1 | | 0.007 | 0 | 0.071 | 0 |
| NLGN2_NRXN1 | | 0.009 | 0.012 | 0.004 | 0 |
| NLGN3_NRXN1 | | 0.008 | 0 | 0.004 | 0 |
| NLGN4X_NRXN1 | | 0 | 0 | 0.028 | 0 |
| NLGN4Y_NRXN1 | | 0 | 0 | 0.032 | 0 |
| CLSTN1_NRXN2 | | 0.13 | 0.117 | 0 | 0 |
| CLSTN2_NRXN2 | | 0 | 0 | 0 | 0 |
| CLSTN3_NRXN2 | | 0.14 | 0.188 | 0 | 0 |
| LRRTM2_NRXN2 | | 0 | 0 | 0 | 0 |
| LRRTM3_NRXN2 | | 0 | 0 | 0 | 0 |
| LRRTM4_NRXN2 | | 0.005 | 0 | 0 | 0 |
| NLGN1_NRXN2 | | 0.007 | 0 | 0 | 0 |
| NLGN2_NRXN2 | | 0.009 | 0.012 | 0 | 0 |
| NLGN3_NRXN2 | | 0.008 | 0 | 0 | 0 |
| NLGN4X_NRXN2 | | 0 | 0 | 0 | 0 |
| NLGN4Y_NRXN2 | | 0 | 0 | 0 | 0 |
| CCL16_CCR8 | | 0 | 0 | 0 | 0.169 |
| CCL18_CCR8 | | 0 | 0 | 0 | 0.005 |
| CCL13_ACKR2 | | 0.01 | 0 | 0 | 0 |
| CCL14_ACKR2 | | 0 | 0 | 0 | 0 |
| CCL2_ACKR2 | | 0 | 0 | 0.242 | 0 |
| CCL3_ACKR2 | | 0.399 | 0.047 | 0 | 0 |
| CCL4_ACKR2 | | 20.215 | 9.855 | 0.004 | 0 |
| CCL5_ACKR2 | | 7.943 | 9.744 | 0.002 | 0 |
| CCL8_ACKR2 | | 0.014 | 0 | 0 | 0 |
| CCL13_CCR3 | | 0.005 | 0 | 0 | 0 |
| CCL14_CCR3 | | 0 | 0 | 0 | 0 |
| CCL15_CCR3 | | 0 | 0 | 0 | 0 |
| CCL24_CCR3 | | 0 | 0 | 0 | 0 |
| CCL26_CCR3 | | 0 | 0 | 0 | 0 |
| CCL3_CCR3 | | 0.394 | 0.041 | 0 | 0 |
| CCL3L1_CCR3 | | 1.169 | 0 | 0 | 0 |
| CCL5_CCR3 | | 7.938 | 9.739 | 0 | 0 |
| CCL8_CCR3 | | 0.009 | 0 | 0 | 0 |
| CCL22_DPP4 | | 0 | 0 | 0.437 | 0.425 |
| CXCL10_DPP4 | | 0 | 0 | 0.45 | 0.438 |
| CXCL11_DPP4 | | 0.426 | 0 | 0.44 | 0.428 |
| CXCL12_DPP4 | | 0.427 | 0 | 0.475 | 0.463 |
| CXCL2_DPP4 | | 0 | 0 | 0.996 | 0.984 |
| CXCL9_DPP4 | | 0 | 0 | 0.438 | 0.426 |
| CCL13_CCR2 | | 0.001 | 0 | 0.114 | 0.058 |
| CCL16_CCR2 | | 0 | 0 | 0.279 | 0.222 |
| CCL2_CCR2 | | 0 | 0 | 0.356 | 0.3 |
| CCL26_CCR2 | | 0 | 0 | 0.225 | 0.168 |
| CCL8_CCR2 | | 0.005 | 0 | 0 | 0 |
| CCL14_CCR1 | | 0 | 0 | 0.049 | 0.062 |
| CCL15_CCR1 | | 0 | 0 | 0.523 | 0.536 |
| CCL16_CCR1 | | 0 | 0 | 0.213 | 0.226 |
| CCL23_CCR1 | | 0 | 0.001 | 0.049 | 0.062 |
| CCL26_CCR1 | | 0 | 0 | 0.159 | 0.172 |
| CCL3_CCR1 | | 0.39 | 0.037 | 0.049 | 0.062 |
| CCL3L1_CCR1 | | 1.165 | 0 | 0.049 | 0.062 |
| CCL5_CCR1 | | 7.934 | 9.735 | 0.051 | 0.064 |
| CCL8_CCR1 | | 0.005 | 0 | 0 | 0 |
| CCL16_HRH4 | | 0 | 0 | 0 | 0 |
| Histamine_byHDC_HRH4 | | 0 | 0 | 0 | 0 |
| CCL17_CCR4 | | 0 | 0 | 0.014 | 0.004 |
| CCL22_CCR4 | | 0 | 0 | 0.014 | 0.004 |
| CCL5_CCR4 | | 7.934 | 9.735 | 0.017 | 0.006 |
| CCL19_ACKR4 | | 0.004 | 0 | 0 | 0 |
| CCL25_ACKR4 | | 0 | 0 | 0 | 0 |
| CXCL13_ACKR4 | | 0 | 0.002 | 0 | 0 |
| CCL19_CCR7 | | 0.004 | 0 | 0 | 0 |
| CCL19_CCRL2 | | 0.004 | 0 | 0 | 0 |
| RARRES2_CCRL2 | | 0.002 | 0 | 9.382 | 9.397 |
| CCL2_ACKR1 | | 0 | 0 | 0.243 | 0.243 |
| CCL5_ACKR1 | | 7.934 | 9.735 | 0.004 | 0.003 |
| CXCL1_ACKR1 | | 0.001 | 0 | 0.375 | 0.374 |
| CXCL8_ACKR1 | | 0 | 0 | 0.139 | 0.139 |
| CCL20_CCR6 | | 1.112 | 2.114 | 1.794 | 2.334 |
| CCL25_CCR9 | | 0 | 0 | 0.01 | 0 |
| CCL27_CCR10 | | 0 | 0 | 0.002 | 0 |
| CCL28_CCR10 | | 0.049 | 0.042 | 0.083 | 0 |
| CCL3_CCR5 | | 0.39 | 0.037 | 0.126 | 0.131 |
| CCL4_CCR5 | | 20.206 | 9.846 | 0.13 | 0.135 |
| CCL5_CCR5 | | 7.934 | 9.735 | 0.128 | 0.133 |
| CCL8_CCR5 | | 0.005 | 0 | 0 | 0 |
| CCL5_GPR75 | | 7.951 | 9.753 | 0 | 0 |
| CXCL1_CXCR1 | | 0.001 | 0 | 0 | 0 |
| CXCL5_CXCR1 | | 0 | 0 | 0 | 0 |
| CXCL6_CXCR1 | | 0 | 0 | 0 | 0 |
| CXCL8_CXCR1 | | 0 | 0 | 0 | 0 |
| CXCL1_CXCR2 | | 0.001 | 0 | 0 | 0 |
| CXCL2_CXCR2 | | 0 | 0 | 0 | 0 |
| CXCL3_CXCR2 | | 0.001 | 0 | 0 | 0 |
| CXCL5_CXCR2 | | 0 | 0 | 0 | 0 |
| CXCL6_CXCR2 | | 0 | 0 | 0 | 0 |
| CXCL8_CXCR2 | | 0 | 0 | 0 | 0 |
| CX3CL1_CX3CR1 | | 0 | 0 | 0.086 | 0 |
| CXCL10_CXCR3 | | 0 | 0 | 0.477 | 0.505 |
| CXCL11_CXCR3 | | 0.001 | 0 | 0.467 | 0.496 |
| CXCL9_CXCR3 | | 0 | 0 | 0.465 | 0.493 |
| PF4_CXCR3 | | 0 | 0 | 0.464 | 0.492 |
| CXCL11_ACKR3 | | 0.018 | 0 | 0.011 | 0 |
| CXCL12_CXCR4 | | 0.002 | 0 | 9.907 | 23.076 |
| CXCL14_CXCR4 | | 0 | 0 | 9.87 | 23.038 |
| CXCL13_CXCR5 | | 0 | 0.002 | 0.009 | 0 |
| CXCL16_CXCR6 | | 0.011 | 0 | 1.809 | 1.641 |
| CCK_CCKBR | | 0 | 0 | 0 | 0 |
| GAST_CCKBR | | 0 | 0 | 0 | 0 |
| Cholesterol_byCEL_RORA | | 0.287 | 0.287 | 2.081 | 2.488 |
| Cholesterol_byLIPA_RORA | | 0.38 | 0.294 | 2.187 | 2.594 |
| Cholesterol_byDHCR24_RORA | | 0.287 | 0.285 | 2.846 | 3.253 |
| Cholesterol_byDHCR7_RORA | | 0.363 | 0.508 | 2.246 | 2.653 |
| Cholesterol_byCEL_RORC | | 0.537 | 0.537 | 0.446 | 0.353 |
| Cholesterol_byLIPA_RORC | | 0.63 | 0.544 | 0.552 | 0.458 |
| Cholesterol_byDHCR24_RORC | | 0.538 | 0.535 | 1.211 | 1.118 |
| Cholesterol_byDHCR7_RORC | | 0.613 | 0.759 | 0.611 | 0.518 |
| Desmosterol_byDHCR7_NR1H2 | | 0.464 | 0.609 | 0.533 | 0.599 |
| Desmosterol_byDHCR7_NR1H3 | | 0.235 | 0.38 | 0.168 | 0 |
| hCGB7_complex_LHCGR | | 0 | 0 | 0 | 0 |
| glyco_Lutropin_LHCGR | | 0 | 0 | 0 | 0 |
| LHB_LHCGR | | 0 | 0.001 | 0 | 0 |
| Thyrostimulin_TSHR | | 0 | 0 | 0.002 | 0 |
| C1QL1_ADGRB3 | | 0 | 0 | 0 | 0 |
| C1QL3_ADGRB3 | | 0.002 | 0 | 0 | 0 |
| C1QL4_ADGRB3 | | 0 | 0 | 0 | 0 |
| C3_C3AR1 | | 0 | 0 | 6.717 | 6.735 |
| C3_C5AR2 | | 0.019 | 0 | 0 | 0 |
| C4A_C5AR2 | | 0 | 0.011 | 0 | 0 |
| C5_C5AR2 | | 0.012 | 0 | 0 | 0 |
| C5_C5AR1 | | 0.004 | 0 | 0 | 0 |
| CRH_CRHR2 | | 0 | 0 | 0 | 0 |
| UCN_CRHR2 | | 0 | 0 | 0 | 0 |
| UCN2_CRHR2 | | 0 | 0 | 0 | 0 |
| CSF1_CSF1R | | 0.123 | 0.088 | 0 | 0 |
| IL34_CSF1R | | 0.003 | 0 | 0 | 0 |
| CSF2_GMCSFR | | 0.068 | 0.018 | 0 | 0 |
| DHEAsulfate_bySULT2B_PPARA | | 0.187 | 0 | 0.296 | 0.318 |
| DHEAsulfate_bySULT1E1_PPARA | | 0 | 0 | 0.027 | 0.049 |
| DHEAsulfate_bySULT2A1_PPARA | | 0 | 0 | 1.792 | 1.814 |
| Dehydroepiandrosterone_bySTS_PPARA | | 0.304 | 0.225 | 0.044 | 0.067 |
| DHEAsulfate_bySULT2B_PPARD | | 0.06 | 0 | 0.333 | 0.314 |
| DHEAsulfate_bySULT1E1_PPARD | | 0 | 0 | 0.064 | 0.046 |
| DHEAsulfate_bySULT2A1_PPARD | | 0 | 0 | 1.829 | 1.81 |
| DHEAsulfate_bySULT2B_PPARG | | 0.151 | 0 | 0 | 0 |
| DHEAsulfate_bySULT1E1_PPARG | | 0 | 0 | 0 | 0 |
| DHEAsulfate_bySULT2A1_PPARG | | 0 | 0 | 0 | 0 |
| DHH_PTCH_BOC_transmembrane_receptor | | 0.002 | 0 | 0 | 0 |
| IHH_PTCH_BOC_transmembrane_receptor | | 0 | 0 | 0 | 0 |
| SHH_PTCH_BOC_transmembrane_receptor | | 0 | 0 | 0 | 0 |
| DHH_PTCH_CDON_transmembrane_receptor | | 0.018 | 0 | 0.002 | 0.001 |
| IHH_PTCH_CDON_transmembrane_receptor | | 0 | 0 | 0.028 | 0.027 |
| SHH_PTCH_CDON_transmembrane_receptor | | 0 | 0 | 0.032 | 0.032 |
| DHH_PTCH_GAS1_transmembrane_receptor | | 0.002 | 0 | 0.005 | 0.003 |
| IHH_PTCH_GAS1_transmembrane_receptor | | 0 | 0 | 0.031 | 0.028 |
| SHH_PTCH_GAS1_transmembrane_receptor | | 0 | 0 | 0.035 | 0.033 |
| DHH_HHIP | | 0.002 | 0 | 0 | 0 |
| IHH_HHIP | | 0 | 0 | 0 | 0 |
| SHH_HHIP | | 0 | 0 | 0 | 0 |
| 5alphaDihydroprogesterone_byDHRS9_PGR | | 0.006 | 0 | 0 | 0 |
| Progesterone_byHSD3B1_PGR | | 0 | 0 | 0 | 0 |
| Ldopa_byTYR_GPR143 | | 0 | 0 | 0 | 0 |
| EDN1_EDNRA | | 0 | 0 | 0 | 0 |
| EDN2_EDNRA | | 0 | 0 | 0 | 0 |
| EDN3_EDNRA | | 0 | 0 | 0 | 0 |
| EDN1_EDNRB | | 0 | 0 | 0 | 0 |
| EDN2_EDNRB | | 0 | 0 | 0 | 0 |
| EDN3_EDNRB | | 0 | 0 | 0 | 0 |
| EFNA1_EPHA1 | | 0.067 | 0 | 1.123 | 1.258 |
| EFNA2_EPHA1 | | 0.072 | 0.065 | 0.044 | 0.179 |
| EFNA3_EPHA1 | | 0.084 | 0.088 | 0.062 | 0.198 |
| EFNA4_EPHA1 | | 0.123 | 0.111 | 0.17 | 0.305 |
| EFNA5_EPHA1 | | 0.069 | 0 | 0.06 | 0.195 |
| EFNA1_EPHA2 | | 0.034 | 0 | 0 | 0 |
| EFNA2_EPHA2 | | 0.039 | 0.031 | 0 | 0 |
| EFNA3_EPHA2 | | 0.05 | 0.054 | 0 | 0 |
| EFNA4_EPHA2 | | 0.089 | 0.078 | 0 | 0 |
| EFNA5_EPHA2 | | 0.035 | 0 | 0 | 0 |
| EFNB1_EPHA2 | | 0.046 | 0.043 | 0 | 0 |
| EFNA1_EPHA3 | | 0.004 | 0 | 0 | 0 |
| EFNA2_EPHA3 | | 0.009 | 0.002 | 0 | 0 |
| EFNA3_EPHA3 | | 0.021 | 0.025 | 0 | 0 |
| EFNA4_EPHA3 | | 0.06 | 0.048 | 0 | 0 |
| EFNA5_EPHA3 | | 0.006 | 0 | 0 | 0 |
| EFNA1_EPHA4 | | 0.005 | 0 | 1.16 | 1.247 |
| EFNA2_EPHA4 | | 0.01 | 0.002 | 0.081 | 0.168 |
| EFNA3_EPHA4 | | 0.021 | 0.025 | 0.099 | 0.187 |
| EFNA4_EPHA4 | | 0.06 | 0.049 | 0.207 | 0.294 |
| EFNA5_EPHA4 | | 0.006 | 0 | 0.097 | 0.184 |
| EFNB1_EPHA4 | | 0.017 | 0.014 | 0.089 | 0.177 |
| EFNB2_EPHA4 | | 0.044 | 0.015 | 0.083 | 0.171 |
| EFNB3_EPHA4 | | 0 | 0 | 0.073 | 0.161 |
| EFNA1_EPHA5 | | 0.009 | 0 | 0 | 0 |
| EFNA2_EPHA5 | | 0.014 | 0.006 | 0 | 0 |
| EFNA3_EPHA5 | | 0.026 | 0.029 | 0 | 0 |
| EFNA4_EPHA5 | | 0.064 | 0.053 | 0 | 0 |
| EFNA5_EPHA5 | | 0.01 | 0 | 0 | 0 |
| EFNA1_EPHA7 | | 0.102 | 0 | 0 | 0 |
| EFNA2_EPHA7 | | 0.107 | 0.099 | 0 | 0 |
| EFNA3_EPHA7 | | 0.119 | 0.122 | 0 | 0 |
| EFNA4_EPHA7 | | 0.157 | 0.146 | 0 | 0 |
| EFNA5_EPHA7 | | 0.103 | 0 | 0 | 0 |
| EFNA5_EPHB2 | | 0.01 | 0 | 0 | 0 |
| EFNB1_EPHB2 | | 0.02 | 0.018 | 0 | 0 |
| EFNB2_EPHB2 | | 0.047 | 0.018 | 0 | 0 |
| EFNB3_EPHB2 | | 0 | 0 | 0 | 0 |
| EFNB1_EPHB1 | | 0.016 | 0.014 | 0.018 | 0.02 |
| EFNB2_EPHB1 | | 0.043 | 0.014 | 0.012 | 0.014 |
| EFNB3_EPHB1 | | 0 | 0 | 0.002 | 0.004 |
| EFNB1_EPHB3 | | 0.04 | 0.038 | 0 | 0 |
| EFNB2_EPHB3 | | 0.067 | 0.038 | 0 | 0 |
| EFNB3_EPHB3 | | 0 | 0 | 0 | 0 |
| EFNB1_EPHB4 | | 0.058 | 0.056 | 0 | 0 |
| EFNB2_EPHB4 | | 0.085 | 0.056 | 0 | 0 |
| EFNB3_EPHB4 | | 0 | 0 | 0 | 0 |
| EFNB1_EPHB6 | | 0.063 | 0.06 | 0.099 | 0.083 |
| EFNB2_EPHB6 | | 0.089 | 0.061 | 0.093 | 0.077 |
| EFNB3_EPHB6 | | 0 | 0 | 0.083 | 0.067 |
| AREG_EGFR | | 1.48 | 2.068 | 0.007 | 0 |
| BTC_EGFR | | 0 | 0 | 0.005 | 0 |
| EGF_EGFR | | 0 | 0.363 | 0.01 | 0 |
| EPGN_EGFR | | 0 | 0 | 0.004 | 0 |
| EREG_EGFR | | 0 | 0 | 0.003 | 0 |
| HBEGF_EGFR | | 0.395 | 0.363 | 0.008 | 0 |
| TGFA_EGFR | | 0.395 | 0.535 | 0.017 | 0 |
| BTC_ERBB3 | | 0 | 0 | 0.005 | 0 |
| NRG1_ERBB3 | | 0 | 0 | 0.041 | 0 |
| NRG2_ERBB3 | | 0.438 | 0.437 | 0.005 | 0 |
| BTC_ERBB4 | | 0 | 0 | 0 | 0 |
| EREG_ERBB4 | | 0 | 0 | 0 | 0 |
| HBEGF_ERBB4 | | 0.034 | 0.002 | 0 | 0 |
| NRG1_ERBB4 | | 0 | 0 | 0 | 0 |
| NRG2_ERBB4 | | 0.015 | 0.013 | 0 | 0 |
| NRG3_ERBB4 | | 0 | 0 | 0 | 0 |
| NRG4_ERBB4 | | 0 | 0 | 0 | 0 |
| HBEGF_ERBB2 | | 0.095 | 0.063 | 0.007 | 0.009 |
| FCER2_CR2 | | 0 | 0 | 0 | 0 |
| FCER2_FGFR2 | | 0 | 0 | 0 | 0 |
| FGF1_FGFR2 | | 0 | 0 | 0 | 0 |
| FGF10_FGFR2 | | 0 | 0 | 0 | 0 |
| FGF2_FGFR2 | | 0 | 0 | 0 | 0 |
| FGF22_FGFR2 | | 0.254 | 0.261 | 0 | 0 |
| FGF3_FGFR2 | | 0 | 0 | 0 | 0 |
| FGF7_FGFR2 | | 0.252 | 0 | 0 | 0 |
| FGF1_FGFR1 | | 0 | 0 | 0.048 | 0.023 |
| FGF2_FGFR1 | | 0 | 0 | 0.053 | 0.028 |
| FGF4_FGFR1 | | 0 | 0 | 0.053 | 0.029 |
| FGF6_FGFR1 | | 0 | 0 | 0.042 | 0.018 |
| NCAM1_FGFR1 | | 0.126 | 0.107 | 0.043 | 0.018 |
| FGF1_FGFR3 | | 0 | 0 | 0 | 0.009 |
| FGF17_FGFR3 | | 0 | 0 | 0 | 0.004 |
| FGF2_FGFR3 | | 0 | 0 | 0 | 0.014 |
| FGF20_FGFR3 | | 0 | 0 | 0 | 0.003 |
| FGF8_FGFR3 | | 0 | 0 | 0 | 0.004 |
| FGF9_FGFR3 | | 0.225 | 0.236 | 0 | 0.004 |
| FGF1_FGFR4 | | 0 | 0 | 0.008 | 0.006 |
| FGF2_FGFR4 | | 0 | 0 | 0.012 | 0.011 |
| SDC2_FGFR4 | | 0.29 | 0 | 1.183 | 1.181 |
| FGF19_BetaKlotho_FGFR4 | | 0 | 0 | 0 | 0 |
| FGF21_BetaKlotho_FGFR4 | | 0 | 0 | 0 | 0 |
| FGF23_Klotho_FGFR1 | | 0 | 0 | 0 | 0 |
| FGL1_LAG3 | | 0.005 | 0 | 2.477 | 2.661 |
| NCAM1_AGRN | | 0.251 | 0.233 | 0 | 0.002 |
| FLRT1_ADGRL1 | | 0 | 0 | 0.025 | 0.01 |
| TENM2_FLRT1_complex_ADGRL1 | | 0 | 0 | 0.025 | 0.01 |
| TENM4_FLRT1_complex_ADGRL1 | | 0 | 0 | 0.025 | 0.01 |
| FLRT2_ADGRL1 | | 0.025 | 0 | 0.259 | 0.244 |
| TENM2_FLRT3_complex_ADGRL1 | | 0 | 0 | 0.106 | 0.091 |
| TENM4_FLRT3_complex_ADGRL1 | | 0 | 0 | 0.032 | 0.018 |
| NRXN1_ADGRL1 | | 0.024 | 0 | 0.027 | 0.012 |
| NRXN2_ADGRL1 | | 0 | 0 | 0.027 | 0.012 |
| NRXN3_ADGRL1 | | 0 | 0 | 0.074 | 0.059 |
| TENM1_ADGRL1 | | 0.025 | 0.024 | 0.079 | 0.064 |
| TENM2_ADGRL1 | | 0 | 0 | 0.106 | 0.091 |
| TENM3_ADGRL1 | | 0 | 0 | 0.024 | 0.009 |
| TENM4_ADGRL1 | | 0 | 0 | 0.032 | 0.018 |
| FLRT1_ADGRL3 | | 0 | 0 | 0 | 0 |
| TENM3_FLRT1_complex_ADGRL3 | | 0 | 0 | 0 | 0 |
| FLRT2_ADGRL3 | | 0.023 | 0 | 0 | 0 |
| FLRT3_ADGRL3 | | 0 | 0 | 0 | 0 |
| TENM3_FLRT3_complex_ADGRL3 | | 0 | 0 | 0 | 0 |
| TENM1_ADGRL3 | | 0.023 | 0.022 | 0 | 0 |
| TENM2_ADGRL3 | | 0 | 0 | 0 | 0 |
| TENM3_ADGRL3 | | 0 | 0 | 0 | 0 |
| TENM4_ADGRL3 | | 0 | 0 | 0 | 0 |
| FLRT3_ADGRL2 | | 0 | 0 | 0.107 | 0 |
| TENM2_FLRT3_complex_ADGRL2 | | 0 | 0 | 0.084 | 0 |
| TENM1_ADGRL2 | | 0.064 | 0.063 | 0.057 | 0 |
| TENM2_ADGRL2 | | 0 | 0 | 0.084 | 0 |
| TENM3_ADGRL2 | | 0 | 0 | 0.002 | 0 |
| TENM4_ADGRL2 | | 0 | 0 | 0.011 | 0 |
| GABA_byGAD1_and_SLC6A1_GABBR1 | | 0 | 0 | 0.022 | 0.026 |
| GABA_byGAD1_and_SLC6A11_GABBR1 | | 0 | 0 | 0.011 | 0.015 |
| GABA_byGAD1_and_SLC6A12_GABBR1 | | 0 | 0 | 0.022 | 0.026 |
| GABA_byGAD1_and_SLC6A13_GABBR1 | | 0 | 0 | 0.015 | 0.019 |
| GABA_byGAD1_and_SLC6A6_GABBR1 | | 0 | 0 | 0.015 | 0.018 |
| GABA_byGAD1_and_SLC6A8_GABBR1 | | 0 | 0 | 0.022 | 0.026 |
| GABA_byGAD2_and_SLC6A1_GABBR1 | | 0 | 0 | 0.011 | 0.014 |
| GABA_byGAD2_and_SLC6A11_GABBR1 | | 0 | 0 | 0.011 | 0.014 |
| GABA_byGAD2_and_SLC6A12_GABBR1 | | 0 | 0 | 0.011 | 0.014 |
| GABA_byGAD2_and_SLC6A13_GABBR1 | | 0 | 0 | 0.011 | 0.014 |
| GABA_byGAD2_and_SLC6A6_GABBR1 | | 0 | 0 | 0.011 | 0.014 |
| GABA_byGAD2_and_SLC6A8_GABBR1 | | 0 | 0 | 0.011 | 0.014 |
| GABA_byGAD1_and_SLC6A1_GABBR2 | | 0 | 0 | 0 | 0 |
| GABA_byGAD1_and_SLC6A11_GABBR2 | | 0 | 0 | 0 | 0 |
| GABA_byGAD1_and_SLC6A12_GABBR2 | | 0 | 0 | 0 | 0 |
| GABA_byGAD1_and_SLC6A13_GABBR2 | | 0 | 0 | 0 | 0 |
| GABA_byGAD1_and_SLC6A6_GABBR2 | | 0 | 0 | 0 | 0 |
| GABA_byGAD1_and_SLC6A8_GABBR2 | | 0 | 0 | 0 | 0 |
| GABA_byGAD2_and_SLC6A1_GABBR2 | | 0 | 0 | 0 | 0 |
| GABA_byGAD2_and_SLC6A11_GABBR2 | | 0 | 0 | 0 | 0 |
| GABA_byGAD2_and_SLC6A12_GABBR2 | | 0 | 0 | 0 | 0 |
| GABA_byGAD2_and_SLC6A13_GABBR2 | | 0 | 0 | 0 | 0 |
| GABA_byGAD2_and_SLC6A6_GABBR2 | | 0 | 0 | 0 | 0 |
| GABA_byGAD2_and_SLC6A8_GABBR2 | | 0 | 0 | 0 | 0 |
| GABA_byGAD1_and_SLC6A1_GABA-A_a1b2_complex | | 0 | 0 | 0 | 0 |
| GABA_byGAD1_and_SLC6A11_GABA-A_a1b2_complex | | 0 | 0 | 0 | 0 |
| GABA_byGAD1_and_SLC6A12_GABA-A_a1b2_complex | | 0 | 0 | 0 | 0 |
| GABA_byGAD1_and_SLC6A13_GABA-A_a1b2_complex | | 0 | 0 | 0 | 0 |
| GABA_byGAD1_and_SLC6A6_GABA-A_a1b2_complex | | 0 | 0 | 0 | 0 |
| GABA_byGAD1_and_SLC6A8_GABA-A_a1b2_complex | | 0 | 0 | 0 | 0 |
| GABA_byGAD2_and_SLC6A1_GABA-A_a1b2_complex | | 0 | 0 | 0 | 0 |
| GABA_byGAD2_and_SLC6A11_GABA-A_a1b2_complex | | 0 | 0 | 0 | 0 |
| GABA_byGAD2_and_SLC6A12_GABA-A_a1b2_complex | | 0 | 0 | 0 | 0 |
| GABA_byGAD2_and_SLC6A13_GABA-A_a1b2_complex | | 0 | 0 | 0 | 0 |
| GABA_byGAD2_and_SLC6A6_GABA-A_a1b2_complex | | 0 | 0 | 0 | 0 |
| GABA_byGAD2_and_SLC6A8_GABA-A_a1b2_complex | | 0 | 0 | 0 | 0 |
| GABA_byGAD1_and_SLC6A1_GABA-A_a1b2d_complex | | 0 | 0 | 0 | 0 |
| GABA_byGAD1_and_SLC6A11_GABA-A_a1b2d_complex | | 0 | 0 | 0 | 0 |
| GABA_byGAD1_and_SLC6A12_GABA-A_a1b2d_complex | | 0 | 0 | 0 | 0 |
| GABA_byGAD1_and_SLC6A13_GABA-A_a1b2d_complex | | 0 | 0 | 0 | 0 |
| GABA_byGAD1_and_SLC6A6_GABA-A_a1b2d_complex | | 0 | 0 | 0 | 0 |
| GABA_byGAD1_and_SLC6A8_GABA-A_a1b2d_complex | | 0 | 0 | 0 | 0 |
| GABA_byGAD2_and_SLC6A1_GABA-A_a1b2d_complex | | 0 | 0 | 0 | 0 |
| GABA_byGAD2_and_SLC6A11_GABA-A_a1b2d_complex | | 0 | 0 | 0 | 0 |
| GABA_byGAD2_and_SLC6A12_GABA-A_a1b2d_complex | | 0 | 0 | 0 | 0 |
| GABA_byGAD2_and_SLC6A13_GABA-A_a1b2d_complex | | 0 | 0 | 0 | 0 |
| GABA_byGAD2_and_SLC6A6_GABA-A_a1b2d_complex | | 0 | 0 | 0 | 0 |
| GABA_byGAD2_and_SLC6A8_GABA-A_a1b2d_complex | | 0 | 0 | 0 | 0 |
| GABA_byGAD1_and_SLC6A1_GABA-A_a1b2g2S_complex | | 0 | 0 | 0 | 0 |
| GABA_byGAD1_and_SLC6A11_GABA-A_a1b2g2S_complex | | 0 | 0 | 0 | 0 |
| GABA_byGAD1_and_SLC6A12_GABA-A_a1b2g2S_complex | | 0 | 0 | 0 | 0 |
| GABA_byGAD1_and_SLC6A13_GABA-A_a1b2g2S_complex | | 0 | 0 | 0 | 0 |
| GABA_byGAD1_and_SLC6A6_GABA-A_a1b2g2S_complex | | 0 | 0 | 0 | 0 |
| GABA_byGAD1_and_SLC6A8_GABA-A_a1b2g2S_complex | | 0 | 0 | 0 | 0 |
| GABA_byGAD2_and_SLC6A1_GABA-A_a1b2g2S_complex | | 0 | 0 | 0 | 0 |
| GABA_byGAD2_and_SLC6A11_GABA-A_a1b2g2S_complex | | 0 | 0 | 0 | 0 |
| GABA_byGAD2_and_SLC6A12_GABA-A_a1b2g2S_complex | | 0 | 0 | 0 | 0 |
| GABA_byGAD2_and_SLC6A13_GABA-A_a1b2g2S_complex | | 0 | 0 | 0 | 0 |
| GABA_byGAD2_and_SLC6A6_GABA-A_a1b2g2S_complex | | 0 | 0 | 0 | 0 |
| GABA_byGAD2_and_SLC6A8_GABA-A_a1b2g2S_complex | | 0 | 0 | 0 | 0 |
| GABA_byGAD1_and_SLC6A1_GABA-A_a1b3_complex | | 0 | 0 | 0 | 0 |
| GABA_byGAD1_and_SLC6A11_GABA-A_a1b3_complex | | 0 | 0 | 0 | 0 |
| GABA_byGAD1_and_SLC6A12_GABA-A_a1b3_complex | | 0 | 0 | 0 | 0 |
| GABA_byGAD1_and_SLC6A13_GABA-A_a1b3_complex | | 0 | 0 | 0 | 0 |
| GABA_byGAD1_and_SLC6A6_GABA-A_a1b3_complex | | 0 | 0 | 0 | 0 |
| GABA_byGAD1_and_SLC6A8_GABA-A_a1b3_complex | | 0 | 0 | 0 | 0 |
| GABA_byGAD2_and_SLC6A1_GABA-A_a1b3_complex | | 0 | 0 | 0 | 0 |
| GABA_byGAD2_and_SLC6A11_GABA-A_a1b3_complex | | 0 | 0 | 0 | 0 |
| GABA_byGAD2_and_SLC6A12_GABA-A_a1b3_complex | | 0 | 0 | 0 | 0 |
| GABA_byGAD2_and_SLC6A13_GABA-A_a1b3_complex | | 0 | 0 | 0 | 0 |
| GABA_byGAD2_and_SLC6A6_GABA-A_a1b3_complex | | 0 | 0 | 0 | 0 |
| GABA_byGAD2_and_SLC6A8_GABA-A_a1b3_complex | | 0 | 0 | 0 | 0 |
| GABA_byGAD1_and_SLC6A1_GABA-A_a1b3g2S_complex | | 0 | 0 | 0 | 0 |
| GABA_byGAD1_and_SLC6A11_GABA-A_a1b3g2S_complex | | 0 | 0 | 0 | 0 |
| GABA_byGAD1_and_SLC6A12_GABA-A_a1b3g2S_complex | | 0 | 0 | 0 | 0 |
| GABA_byGAD1_and_SLC6A13_GABA-A_a1b3g2S_complex | | 0 | 0 | 0 | 0 |
| GABA_byGAD1_and_SLC6A6_GABA-A_a1b3g2S_complex | | 0 | 0 | 0 | 0 |
| GABA_byGAD1_and_SLC6A8_GABA-A_a1b3g2S_complex | | 0 | 0 | 0 | 0 |
| GABA_byGAD2_and_SLC6A1_GABA-A_a1b3g2S_complex | | 0 | 0 | 0 | 0 |
| GABA_byGAD2_and_SLC6A11_GABA-A_a1b3g2S_complex | | 0 | 0 | 0 | 0 |
| GABA_byGAD2_and_SLC6A12_GABA-A_a1b3g2S_complex | | 0 | 0 | 0 | 0 |
| GABA_byGAD2_and_SLC6A13_GABA-A_a1b3g2S_complex | | 0 | 0 | 0 | 0 |
| GABA_byGAD2_and_SLC6A6_GABA-A_a1b3g2S_complex | | 0 | 0 | 0 | 0 |
| GABA_byGAD2_and_SLC6A8_GABA-A_a1b3g2S_complex | | 0 | 0 | 0 | 0 |
| GABA_byGAD1_and_SLC6A1_GABA-A_a2b3g2S_complex | | 0 | 0 | 0 | 0 |
| GABA_byGAD1_and_SLC6A11_GABA-A_a2b3g2S_complex | | 0 | 0 | 0 | 0 |
| GABA_byGAD1_and_SLC6A12_GABA-A_a2b3g2S_complex | | 0 | 0 | 0 | 0 |
| GABA_byGAD1_and_SLC6A13_GABA-A_a2b3g2S_complex | | 0 | 0 | 0 | 0 |
| GABA_byGAD1_and_SLC6A6_GABA-A_a2b3g2S_complex | | 0 | 0 | 0 | 0 |
| GABA_byGAD1_and_SLC6A8_GABA-A_a2b3g2S_complex | | 0 | 0 | 0 | 0 |
| GABA_byGAD2_and_SLC6A1_GABA-A_a2b3g2S_complex | | 0 | 0 | 0 | 0 |
| GABA_byGAD2_and_SLC6A11_GABA-A_a2b3g2S_complex | | 0 | 0 | 0 | 0 |
| GABA_byGAD2_and_SLC6A12_GABA-A_a2b3g2S_complex | | 0 | 0 | 0 | 0 |
| GABA_byGAD2_and_SLC6A13_GABA-A_a2b3g2S_complex | | 0 | 0 | 0 | 0 |
| GABA_byGAD2_and_SLC6A6_GABA-A_a2b3g2S_complex | | 0 | 0 | 0 | 0 |
| GABA_byGAD2_and_SLC6A8_GABA-A_a2b3g2S_complex | | 0 | 0 | 0 | 0 |
| GABA_byGAD1_and_SLC6A1_GABA-A_a3b3e_complex | | 0 | 0 | 0 | 0 |
| GABA_byGAD1_and_SLC6A11_GABA-A_a3b3e_complex | | 0 | 0 | 0 | 0 |
| GABA_byGAD1_and_SLC6A12_GABA-A_a3b3e_complex | | 0 | 0 | 0 | 0 |
| GABA_byGAD1_and_SLC6A13_GABA-A_a3b3e_complex | | 0 | 0 | 0 | 0 |
| GABA_byGAD1_and_SLC6A6_GABA-A_a3b3e_complex | | 0 | 0 | 0 | 0 |
| GABA_byGAD1_and_SLC6A8_GABA-A_a3b3e_complex | | 0 | 0 | 0 | 0 |
| GABA_byGAD2_and_SLC6A1_GABA-A_a3b3e_complex | | 0 | 0 | 0 | 0 |
| GABA_byGAD2_and_SLC6A11_GABA-A_a3b3e_complex | | 0 | 0 | 0 | 0 |
| GABA_byGAD2_and_SLC6A12_GABA-A_a3b3e_complex | | 0 | 0 | 0 | 0 |
| GABA_byGAD2_and_SLC6A13_GABA-A_a3b3e_complex | | 0 | 0 | 0 | 0 |
| GABA_byGAD2_and_SLC6A6_GABA-A_a3b3e_complex | | 0 | 0 | 0 | 0 |
| GABA_byGAD2_and_SLC6A8_GABA-A_a3b3e_complex | | 0 | 0 | 0 | 0 |
| GABA_byGAD1_and_SLC6A1_GABA-A_a3b3g2S_complex | | 0 | 0 | 0 | 0 |
| GABA_byGAD1_and_SLC6A11_GABA-A_a3b3g2S_complex | | 0 | 0 | 0 | 0 |
| GABA_byGAD1_and_SLC6A12_GABA-A_a3b3g2S_complex | | 0 | 0 | 0 | 0 |
| GABA_byGAD1_and_SLC6A13_GABA-A_a3b3g2S_complex | | 0 | 0 | 0 | 0 |
| GABA_byGAD1_and_SLC6A6_GABA-A_a3b3g2S_complex | | 0 | 0 | 0 | 0 |
| GABA_byGAD1_and_SLC6A8_GABA-A_a3b3g2S_complex | | 0 | 0 | 0 | 0 |
| GABA_byGAD2_and_SLC6A1_GABA-A_a3b3g2S_complex | | 0 | 0 | 0 | 0 |
| GABA_byGAD2_and_SLC6A11_GABA-A_a3b3g2S_complex | | 0 | 0 | 0 | 0 |
| GABA_byGAD2_and_SLC6A12_GABA-A_a3b3g2S_complex | | 0 | 0 | 0 | 0 |
| GABA_byGAD2_and_SLC6A13_GABA-A_a3b3g2S_complex | | 0 | 0 | 0 | 0 |
| GABA_byGAD2_and_SLC6A6_GABA-A_a3b3g2S_complex | | 0 | 0 | 0 | 0 |
| GABA_byGAD2_and_SLC6A8_GABA-A_a3b3g2S_complex | | 0 | 0 | 0 | 0 |
| GABA_byGAD1_and_SLC6A1_GABA-A_a3b3o_complex | | 0 | 0 | 0 | 0 |
| GABA_byGAD1_and_SLC6A11_GABA-A_a3b3o_complex | | 0 | 0 | 0 | 0 |
| GABA_byGAD1_and_SLC6A12_GABA-A_a3b3o_complex | | 0 | 0 | 0 | 0 |
| GABA_byGAD1_and_SLC6A13_GABA-A_a3b3o_complex | | 0 | 0 | 0 | 0 |
| GABA_byGAD1_and_SLC6A6_GABA-A_a3b3o_complex | | 0 | 0 | 0 | 0 |
| GABA_byGAD1_and_SLC6A8_GABA-A_a3b3o_complex | | 0 | 0 | 0 | 0 |
| GABA_byGAD2_and_SLC6A1_GABA-A_a3b3o_complex | | 0 | 0 | 0 | 0 |
| GABA_byGAD2_and_SLC6A11_GABA-A_a3b3o_complex | | 0 | 0 | 0 | 0 |
| GABA_byGAD2_and_SLC6A12_GABA-A_a3b3o_complex | | 0 | 0 | 0 | 0 |
| GABA_byGAD2_and_SLC6A13_GABA-A_a3b3o_complex | | 0 | 0 | 0 | 0 |
| GABA_byGAD2_and_SLC6A6_GABA-A_a3b3o_complex | | 0 | 0 | 0 | 0 |
| GABA_byGAD2_and_SLC6A8_GABA-A_a3b3o_complex | | 0 | 0 | 0 | 0 |
| GABA_byGAD1_and_SLC6A1_GABA-A_a6b3d_complex | | 0 | 0 | 0 | 0 |
| GABA_byGAD1_and_SLC6A11_GABA-A_a6b3d_complex | | 0 | 0 | 0 | 0 |
| GABA_byGAD1_and_SLC6A12_GABA-A_a6b3d_complex | | 0 | 0 | 0 | 0 |
| GABA_byGAD1_and_SLC6A13_GABA-A_a6b3d_complex | | 0 | 0 | 0 | 0 |
| GABA_byGAD1_and_SLC6A6_GABA-A_a6b3d_complex | | 0 | 0 | 0 | 0 |
| GABA_byGAD1_and_SLC6A8_GABA-A_a6b3d_complex | | 0 | 0 | 0 | 0 |
| GABA_byGAD2_and_SLC6A1_GABA-A_a6b3d_complex | | 0 | 0 | 0 | 0 |
| GABA_byGAD2_and_SLC6A11_GABA-A_a6b3d_complex | | 0 | 0 | 0 | 0 |
| GABA_byGAD2_and_SLC6A12_GABA-A_a6b3d_complex | | 0 | 0 | 0 | 0 |
| GABA_byGAD2_and_SLC6A13_GABA-A_a6b3d_complex | | 0 | 0 | 0 | 0 |
| GABA_byGAD2_and_SLC6A6_GABA-A_a6b3d_complex | | 0 | 0 | 0 | 0 |
| GABA_byGAD2_and_SLC6A8_GABA-A_a6b3d_complex | | 0 | 0 | 0 | 0 |
| GABA_byGAD1_and_SLC6A1_GABA-A_a6b3g2S_complex | | 0 | 0 | 0 | 0 |
| GABA_byGAD1_and_SLC6A11_GABA-A_a6b3g2S_complex | | 0 | 0 | 0 | 0 |
| GABA_byGAD1_and_SLC6A12_GABA-A_a6b3g2S_complex | | 0 | 0 | 0 | 0 |
| GABA_byGAD1_and_SLC6A13_GABA-A_a6b3g2S_complex | | 0 | 0 | 0 | 0 |
| GABA_byGAD1_and_SLC6A6_GABA-A_a6b3g2S_complex | | 0 | 0 | 0 | 0 |
| GABA_byGAD1_and_SLC6A8_GABA-A_a6b3g2S_complex | | 0 | 0 | 0 | 0 |
| GABA_byGAD2_and_SLC6A1_GABA-A_a6b3g2S_complex | | 0 | 0 | 0 | 0 |
| GABA_byGAD2_and_SLC6A11_GABA-A_a6b3g2S_complex | | 0 | 0 | 0 | 0 |
| GABA_byGAD2_and_SLC6A12_GABA-A_a6b3g2S_complex | | 0 | 0 | 0 | 0 |
| GABA_byGAD2_and_SLC6A13_GABA-A_a6b3g2S_complex | | 0 | 0 | 0 | 0 |
| GABA_byGAD2_and_SLC6A6_GABA-A_a6b3g2S_complex | | 0 | 0 | 0 | 0 |
| GABA_byGAD2_and_SLC6A8_GABA-A_a6b3g2S_complex | | 0 | 0 | 0 | 0 |
| GAL_GALR2 | | 0 | 0 | 0 | 0.001 |
| GALP_GALR2 | | 0 | 0 | 0 | 0.002 |
| GAL_GALR2 | | 0 | 0 | 0 | 0 |
| GALP_GALR2 | | 0 | 0 | 0 | 0 |
| SPX_GALR2 | | 0 | 0 | 0 | 0 |
| GAL_GALR3 | | 0 | 0 | 0 | 0 |
| GALP_GALR3 | | 0 | 0 | 0 | 0 |
| GAL_GALR3 | | 0 | 0 | 0 | 0 |
| GALP_GALR3 | | 0 | 0 | 0 | 0 |
| SPX_GALR3 | | 0 | 0 | 0 | 0 |
| LGALS3_MERTK | | 0.688 | 0.067 | 0 | 0 |
| GAS6_MERTK | | 0 | 0 | 0 | 0 |
| LGALS9_BCR_CD45_CD22 | | 0.034 | 0.003 | 0 | 0 |
| LGALS9_HAVCR2 | | 0.034 | 0.002 | 0.018 | 0.012 |
| LGALS9_P4HB | | 5.073 | 5.042 | 0.631 | 0.292 |
| GIP_GIPR | | 0 | 0 | 0.016 | 0.013 |
| GRP_GRPR | | 0.002 | 0 | 0 | 0 |
| NMB_GRPR | | 0.071 | 0.031 | 0 | 0 |
| GRP_NMBR | | 0.002 | 0 | 0 | 0 |
| NMB_NMBR | | 0.071 | 0.031 | 0 | 0 |
| Glutamate_byGLS_and_SLC17A7_GRIA1 | | 0 | 0.003 | 0 | 0 |
| Glutamate_byGLS_and_SLC17A8_GRIA1 | | 0 | 0 | 0 | 0 |
| Glutamate_byGLS_and_SLC1A1_GRIA1 | | 0 | 0 | 0 | 0 |
| Glutamate_byGLS_and_SLC1A2_GRIA1 | | 0 | 0 | 0 | 0 |
| Glutamate_byGLS_and_SLC1A3_GRIA1 | | 0 | 0.001 | 0 | 0 |
| Glutamate_byGLS_and_SLC1A7_GRIA1 | | 0.002 | 0 | 0 | 0 |
| Glutamate_byGLS2_and_SLC17A7_GRIA1 | | 0 | 0 | 0 | 0 |
| Glutamate_byGLS2_and_SLC17A8_GRIA1 | | 0 | 0 | 0 | 0 |
| Glutamate_byGLS2_and_SLC1A1_GRIA1 | | 0 | 0 | 0 | 0 |
| Glutamate_byGLS2_and_SLC1A2_GRIA1 | | 0 | 0 | 0 | 0 |
| Glutamate_byGLS2_and_SLC1A3_GRIA1 | | 0 | 0 | 0 | 0 |
| Glutamate_byGLS2_and_SLC1A7_GRIA1 | | 0 | 0 | 0 | 0 |
| Glutamate_byGLS_and_SLC17A7_GRIA2 | | 0 | 0.009 | 0 | 0 |
| Glutamate_byGLS_and_SLC17A8_GRIA2 | | 0 | 0 | 0 | 0 |
| Glutamate_byGLS_and_SLC1A1_GRIA2 | | 0 | 0 | 0 | 0 |
| Glutamate_byGLS_and_SLC1A2_GRIA2 | | 0 | 0 | 0 | 0 |
| Glutamate_byGLS_and_SLC1A3_GRIA2 | | 0 | 0.007 | 0 | 0 |
| Glutamate_byGLS_and_SLC1A7_GRIA2 | | 0.008 | 0 | 0 | 0 |
| Glutamate_byGLS2_and_SLC17A7_GRIA2 | | 0 | 0 | 0 | 0 |
| Glutamate_byGLS2_and_SLC17A8_GRIA2 | | 0 | 0 | 0 | 0 |
| Glutamate_byGLS2_and_SLC1A1_GRIA2 | | 0 | 0 | 0 | 0 |
| Glutamate_byGLS2_and_SLC1A2_GRIA2 | | 0 | 0 | 0 | 0 |
| Glutamate_byGLS2_and_SLC1A3_GRIA2 | | 0 | 0 | 0 | 0 |
| Glutamate_byGLS2_and_SLC1A7_GRIA2 | | 0 | 0 | 0 | 0 |
| Glutamate_byGLS_and_SLC17A7_GRIA3 | | 0 | 0.081 | 0 | 0 |
| Glutamate_byGLS_and_SLC17A8_GRIA3 | | 0 | 0 | 0 | 0 |
| Glutamate_byGLS_and_SLC1A1_GRIA3 | | 0 | 0 | 0 | 0 |
| Glutamate_byGLS_and_SLC1A2_GRIA3 | | 0 | 0 | 0 | 0 |
| Glutamate_byGLS_and_SLC1A3_GRIA3 | | 0 | 0.079 | 0 | 0 |
| Glutamate_byGLS_and_SLC1A7_GRIA3 | | 0.08 | 0 | 0 | 0 |
| Glutamate_byGLS2_and_SLC17A7_GRIA3 | | 0 | 0 | 0 | 0 |
| Glutamate_byGLS2_and_SLC17A8_GRIA3 | | 0 | 0 | 0 | 0 |
| Glutamate_byGLS2_and_SLC1A1_GRIA3 | | 0 | 0 | 0 | 0 |
| Glutamate_byGLS2_and_SLC1A2_GRIA3 | | 0 | 0 | 0 | 0 |
| Glutamate_byGLS2_and_SLC1A3_GRIA3 | | 0 | 0 | 0 | 0 |
| Glutamate_byGLS2_and_SLC1A7_GRIA3 | | 0 | 0 | 0 | 0 |
| Glutamate_byGLS_and_SLC17A7_GRIA4 | | 0 | 0.038 | 0 | 0 |
| Glutamate_byGLS_and_SLC17A8_GRIA4 | | 0 | 0 | 0 | 0 |
| Glutamate_byGLS_and_SLC1A1_GRIA4 | | 0 | 0 | 0 | 0 |
| Glutamate_byGLS_and_SLC1A2_GRIA4 | | 0 | 0 | 0 | 0 |
| Glutamate_byGLS_and_SLC1A3_GRIA4 | | 0 | 0.036 | 0 | 0 |
| Glutamate_byGLS_and_SLC1A7_GRIA4 | | 0.037 | 0 | 0 | 0 |
| Glutamate_byGLS2_and_SLC17A7_GRIA4 | | 0 | 0 | 0 | 0 |
| Glutamate_byGLS2_and_SLC17A8_GRIA4 | | 0 | 0 | 0 | 0 |
| Glutamate_byGLS2_and_SLC1A1_GRIA4 | | 0 | 0 | 0 | 0 |
| Glutamate_byGLS2_and_SLC1A2_GRIA4 | | 0 | 0 | 0 | 0 |
| Glutamate_byGLS2_and_SLC1A3_GRIA4 | | 0 | 0 | 0 | 0 |
| Glutamate_byGLS2_and_SLC1A7_GRIA4 | | 0 | 0 | 0 | 0 |
| Glutamate_byGLS_and_SLC17A7_GRIK1 | | 0 | 0.048 | 0 | 0 |
| Glutamate_byGLS_and_SLC17A8_GRIK1 | | 0 | 0 | 0 | 0 |
| Glutamate_byGLS_and_SLC1A1_GRIK1 | | 0 | 0 | 0 | 0 |
| Glutamate_byGLS_and_SLC1A2_GRIK1 | | 0 | 0 | 0 | 0 |
| Glutamate_byGLS_and_SLC1A3_GRIK1 | | 0 | 0.046 | 0 | 0 |
| Glutamate_byGLS_and_SLC1A7_GRIK1 | | 0.047 | 0 | 0 | 0 |
| Glutamate_byGLS2_and_SLC17A7_GRIK1 | | 0 | 0 | 0 | 0 |
| Glutamate_byGLS2_and_SLC17A8_GRIK1 | | 0 | 0 | 0 | 0 |
| Glutamate_byGLS2_and_SLC1A1_GRIK1 | | 0 | 0 | 0 | 0 |
| Glutamate_byGLS2_and_SLC1A2_GRIK1 | | 0 | 0 | 0 | 0 |
| Glutamate_byGLS2_and_SLC1A3_GRIK1 | | 0 | 0 | 0 | 0 |
| Glutamate_byGLS2_and_SLC1A7_GRIK1 | | 0 | 0 | 0 | 0 |
| Glutamate_byGLS_and_SLC17A7_Glutamate_Kainate_1_4_complex | | 0 | 0.015 | 0 | 0 |
| Glutamate_byGLS_and_SLC17A8_Glutamate_Kainate_1_4_complex | | 0 | 0 | 0 | 0 |
| Glutamate_byGLS_and_SLC1A1_Glutamate_Kainate_1_4_complex | | 0 | 0 | 0 | 0 |
| Glutamate_byGLS_and_SLC1A2_Glutamate_Kainate_1_4_complex | | 0 | 0 | 0 | 0 |
| Glutamate_byGLS_and_SLC1A3_Glutamate_Kainate_1_4_complex | | 0 | 0.013 | 0 | 0 |
| Glutamate_byGLS_and_SLC1A7_Glutamate_Kainate_1_4_complex | | 0.014 | 0 | 0 | 0 |
| Glutamate_byGLS2_and_SLC17A7_Glutamate_Kainate_1_4_complex | | 0 | 0 | 0 | 0 |
| Glutamate_byGLS2_and_SLC17A8_Glutamate_Kainate_1_4_complex | | 0 | 0 | 0 | 0 |
| Glutamate_byGLS2_and_SLC1A1_Glutamate_Kainate_1_4_complex | | 0 | 0 | 0 | 0 |
| Glutamate_byGLS2_and_SLC1A2_Glutamate_Kainate_1_4_complex | | 0 | 0 | 0 | 0 |
| Glutamate_byGLS2_and_SLC1A3_Glutamate_Kainate_1_4_complex | | 0 | 0 | 0 | 0 |
| Glutamate_byGLS2_and_SLC1A7_Glutamate_Kainate_1_4_complex | | 0 | 0 | 0 | 0 |
| Glutamate_byGLS_and_SLC17A7_Glutamate_Kainate_1_5_complex | | 0 | 0.003 | 0 | 0 |
| Glutamate_byGLS_and_SLC17A8_Glutamate_Kainate_1_5_complex | | 0 | 0 | 0 | 0 |
| Glutamate_byGLS_and_SLC1A1_Glutamate_Kainate_1_5_complex | | 0 | 0 | 0 | 0 |
| Glutamate_byGLS_and_SLC1A2_Glutamate_Kainate_1_5_complex | | 0 | 0 | 0 | 0 |
| Glutamate_byGLS_and_SLC1A3_Glutamate_Kainate_1_5_complex | | 0 | 0.001 | 0 | 0 |
| Glutamate_byGLS_and_SLC1A7_Glutamate_Kainate_1_5_complex | | 0.002 | 0 | 0 | 0 |
| Glutamate_byGLS2_and_SLC17A7_Glutamate_Kainate_1_5_complex | | 0 | 0 | 0 | 0 |
| Glutamate_byGLS2_and_SLC17A8_Glutamate_Kainate_1_5_complex | | 0 | 0 | 0 | 0 |
| Glutamate_byGLS2_and_SLC1A1_Glutamate_Kainate_1_5_complex | | 0 | 0 | 0 | 0 |
| Glutamate_byGLS2_and_SLC1A2_Glutamate_Kainate_1_5_complex | | 0 | 0 | 0 | 0 |
| Glutamate_byGLS2_and_SLC1A3_Glutamate_Kainate_1_5_complex | | 0 | 0 | 0 | 0 |
| Glutamate_byGLS2_and_SLC1A7_Glutamate_Kainate_1_5_complex | | 0 | 0 | 0 | 0 |
| Glutamate_byGLS_and_SLC17A7_GRIK2 | | 0 | 0.02 | 0 | 0 |
| Glutamate_byGLS_and_SLC17A8_GRIK2 | | 0 | 0 | 0 | 0 |
| Glutamate_byGLS_and_SLC1A1_GRIK2 | | 0 | 0 | 0 | 0 |
| Glutamate_byGLS_and_SLC1A2_GRIK2 | | 0 | 0 | 0 | 0 |
| Glutamate_byGLS_and_SLC1A3_GRIK2 | | 0 | 0.018 | 0 | 0 |
| Glutamate_byGLS_and_SLC1A7_GRIK2 | | 0.02 | 0 | 0 | 0 |
| Glutamate_byGLS2_and_SLC17A7_GRIK2 | | 0 | 0 | 0 | 0 |
| Glutamate_byGLS2_and_SLC17A8_GRIK2 | | 0 | 0 | 0 | 0 |
| Glutamate_byGLS2_and_SLC1A1_GRIK2 | | 0 | 0 | 0 | 0 |
| Glutamate_byGLS2_and_SLC1A2_GRIK2 | | 0 | 0 | 0 | 0 |
| Glutamate_byGLS2_and_SLC1A3_GRIK2 | | 0 | 0 | 0 | 0 |
| Glutamate_byGLS2_and_SLC1A7_GRIK2 | | 0 | 0 | 0 | 0 |
| Glutamate_byGLS_and_SLC17A7_Glutamate_Kainate_2_4_complex | | 0 | 0.015 | 0 | 0 |
| Glutamate_byGLS_and_SLC17A8_Glutamate_Kainate_2_4_complex | | 0 | 0 | 0 | 0 |
| Glutamate_byGLS_and_SLC1A1_Glutamate_Kainate_2_4_complex | | 0 | 0 | 0 | 0 |
| Glutamate_byGLS_and_SLC1A2_Glutamate_Kainate_2_4_complex | | 0 | 0 | 0 | 0 |
| Glutamate_byGLS_and_SLC1A3_Glutamate_Kainate_2_4_complex | | 0 | 0.013 | 0 | 0 |
| Glutamate_byGLS_and_SLC1A7_Glutamate_Kainate_2_4_complex | | 0.014 | 0 | 0 | 0 |
| Glutamate_byGLS2_and_SLC17A7_Glutamate_Kainate_2_4_complex | | 0 | 0 | 0 | 0 |
| Glutamate_byGLS2_and_SLC17A8_Glutamate_Kainate_2_4_complex | | 0 | 0 | 0 | 0 |
| Glutamate_byGLS2_and_SLC1A1_Glutamate_Kainate_2_4_complex | | 0 | 0 | 0 | 0 |
| Glutamate_byGLS2_and_SLC1A2_Glutamate_Kainate_2_4_complex | | 0 | 0 | 0 | 0 |
| Glutamate_byGLS2_and_SLC1A3_Glutamate_Kainate_2_4_complex | | 0 | 0 | 0 | 0 |
| Glutamate_byGLS2_and_SLC1A7_Glutamate_Kainate_2_4_complex | | 0 | 0 | 0 | 0 |
| Glutamate_byGLS_and_SLC17A7_Glutamate_Kainate_2_5_complex | | 0 | 0.003 | 0 | 0 |
| Glutamate_byGLS_and_SLC17A8_Glutamate_Kainate_2_5_complex | | 0 | 0 | 0 | 0 |
| Glutamate_byGLS_and_SLC1A1_Glutamate_Kainate_2_5_complex | | 0 | 0 | 0 | 0 |
| Glutamate_byGLS_and_SLC1A2_Glutamate_Kainate_2_5_complex | | 0 | 0 | 0 | 0 |
| Glutamate_byGLS_and_SLC1A3_Glutamate_Kainate_2_5_complex | | 0 | 0.001 | 0 | 0 |
| Glutamate_byGLS_and_SLC1A7_Glutamate_Kainate_2_5_complex | | 0.002 | 0 | 0 | 0 |
| Glutamate_byGLS2_and_SLC17A7_Glutamate_Kainate_2_5_complex | | 0 | 0 | 0 | 0 |
| Glutamate_byGLS2_and_SLC17A8_Glutamate_Kainate_2_5_complex | | 0 | 0 | 0 | 0 |
| Glutamate_byGLS2_and_SLC1A1_Glutamate_Kainate_2_5_complex | | 0 | 0 | 0 | 0 |
| Glutamate_byGLS2_and_SLC1A2_Glutamate_Kainate_2_5_complex | | 0 | 0 | 0 | 0 |
| Glutamate_byGLS2_and_SLC1A3_Glutamate_Kainate_2_5_complex | | 0 | 0 | 0 | 0 |
| Glutamate_byGLS2_and_SLC1A7_Glutamate_Kainate_2_5_complex | | 0 | 0 | 0 | 0 |
| Glutamate_byGLS_and_SLC17A7_GRIK3 | | 0 | 0.003 | 0 | 0 |
| Glutamate_byGLS_and_SLC17A8_GRIK3 | | 0 | 0 | 0 | 0 |
| Glutamate_byGLS_and_SLC1A1_GRIK3 | | 0 | 0 | 0 | 0 |
| Glutamate_byGLS_and_SLC1A2_GRIK3 | | 0 | 0 | 0 | 0 |
| Glutamate_byGLS_and_SLC1A3_GRIK3 | | 0 | 0 | 0 | 0 |
| Glutamate_byGLS_and_SLC1A7_GRIK3 | | 0.002 | 0 | 0 | 0 |
| Glutamate_byGLS2_and_SLC17A7_GRIK3 | | 0 | 0 | 0 | 0 |
| Glutamate_byGLS2_and_SLC17A8_GRIK3 | | 0 | 0 | 0 | 0 |
| Glutamate_byGLS2_and_SLC1A1_GRIK3 | | 0 | 0 | 0 | 0 |
| Glutamate_byGLS2_and_SLC1A2_GRIK3 | | 0 | 0 | 0 | 0 |
| Glutamate_byGLS2_and_SLC1A3_GRIK3 | | 0 | 0 | 0 | 0 |
| Glutamate_byGLS2_and_SLC1A7_GRIK3 | | 0 | 0 | 0 | 0 |
| Glutamate_byGLS_and_SLC17A7_Glutamate_Kainate_3_4_complex | | 0 | 0.003 | 0 | 0 |
| Glutamate_byGLS_and_SLC17A8_Glutamate_Kainate_3_4_complex | | 0 | 0 | 0 | 0 |
| Glutamate_byGLS_and_SLC1A1_Glutamate_Kainate_3_4_complex | | 0 | 0 | 0 | 0 |
| Glutamate_byGLS_and_SLC1A2_Glutamate_Kainate_3_4_complex | | 0 | 0 | 0 | 0 |
| Glutamate_byGLS_and_SLC1A3_Glutamate_Kainate_3_4_complex | | 0 | 0 | 0 | 0 |
| Glutamate_byGLS_and_SLC1A7_Glutamate_Kainate_3_4_complex | | 0.002 | 0 | 0 | 0 |
| Glutamate_byGLS2_and_SLC17A7_Glutamate_Kainate_3_4_complex | | 0 | 0 | 0 | 0 |
| Glutamate_byGLS2_and_SLC17A8_Glutamate_Kainate_3_4_complex | | 0 | 0 | 0 | 0 |
| Glutamate_byGLS2_and_SLC1A1_Glutamate_Kainate_3_4_complex | | 0 | 0 | 0 | 0 |
| Glutamate_byGLS2_and_SLC1A2_Glutamate_Kainate_3_4_complex | | 0 | 0 | 0 | 0 |
| Glutamate_byGLS2_and_SLC1A3_Glutamate_Kainate_3_4_complex | | 0 | 0 | 0 | 0 |
| Glutamate_byGLS2_and_SLC1A7_Glutamate_Kainate_3_4_complex | | 0 | 0 | 0 | 0 |
| Glutamate_byGLS_and_SLC17A7_Glutamate_Kainate_3_5_complex | | 0 | 0.003 | 0 | 0 |
| Glutamate_byGLS_and_SLC17A8_Glutamate_Kainate_3_5_complex | | 0 | 0 | 0 | 0 |
| Glutamate_byGLS_and_SLC1A1_Glutamate_Kainate_3_5_complex | | 0 | 0 | 0 | 0 |
| Glutamate_byGLS_and_SLC1A2_Glutamate_Kainate_3_5_complex | | 0 | 0 | 0 | 0 |
| Glutamate_byGLS_and_SLC1A3_Glutamate_Kainate_3_5_complex | | 0 | 0 | 0 | 0 |
| Glutamate_byGLS_and_SLC1A7_Glutamate_Kainate_3_5_complex | | 0.002 | 0 | 0 | 0 |
| Glutamate_byGLS2_and_SLC17A7_Glutamate_Kainate_3_5_complex | | 0 | 0 | 0 | 0 |
| Glutamate_byGLS2_and_SLC17A8_Glutamate_Kainate_3_5_complex | | 0 | 0 | 0 | 0 |
| Glutamate_byGLS2_and_SLC1A1_Glutamate_Kainate_3_5_complex | | 0 | 0 | 0 | 0 |
| Glutamate_byGLS2_and_SLC1A2_Glutamate_Kainate_3_5_complex | | 0 | 0 | 0 | 0 |
| Glutamate_byGLS2_and_SLC1A3_Glutamate_Kainate_3_5_complex | | 0 | 0 | 0 | 0 |
| Glutamate_byGLS2_and_SLC1A7_Glutamate_Kainate_3_5_complex | | 0 | 0 | 0 | 0 |
| Glutamate_byGLS_and_SLC17A7_Glutamate_NMDA_1_2A_complex | | 0 | 0.003 | 0 | 0 |
| Glutamate_byGLS_and_SLC17A8_Glutamate_NMDA_1_2A_complex | | 0 | 0 | 0 | 0 |
| Glutamate_byGLS_and_SLC1A1_Glutamate_NMDA_1_2A_complex | | 0 | 0 | 0 | 0 |
| Glutamate_byGLS_and_SLC1A2_Glutamate_NMDA_1_2A_complex | | 0 | 0 | 0 | 0 |
| Glutamate_byGLS_and_SLC1A3_Glutamate_NMDA_1_2A_complex | | 0 | 0.001 | 0 | 0 |
| Glutamate_byGLS_and_SLC1A7_Glutamate_NMDA_1_2A_complex | | 0.002 | 0 | 0 | 0 |
| Glutamate_byGLS2_and_SLC17A7_Glutamate_NMDA_1_2A_complex | | 0 | 0 | 0 | 0 |
| Glutamate_byGLS2_and_SLC17A8_Glutamate_NMDA_1_2A_complex | | 0 | 0 | 0 | 0 |
| Glutamate_byGLS2_and_SLC1A1_Glutamate_NMDA_1_2A_complex | | 0 | 0 | 0 | 0 |
| Glutamate_byGLS2_and_SLC1A2_Glutamate_NMDA_1_2A_complex | | 0 | 0 | 0 | 0 |
| Glutamate_byGLS2_and_SLC1A3_Glutamate_NMDA_1_2A_complex | | 0 | 0 | 0 | 0 |
| Glutamate_byGLS2_and_SLC1A7_Glutamate_NMDA_1_2A_complex | | 0 | 0 | 0 | 0 |
| Glutamate_byGLS_and_SLC17A7_Glutamate_NMDA_1_2B_complex | | 0 | 0.003 | 0 | 0 |
| Glutamate_byGLS_and_SLC17A8_Glutamate_NMDA_1_2B_complex | | 0 | 0 | 0 | 0 |
| Glutamate_byGLS_and_SLC1A1_Glutamate_NMDA_1_2B_complex | | 0 | 0 | 0 | 0 |
| Glutamate_byGLS_and_SLC1A2_Glutamate_NMDA_1_2B_complex | | 0 | 0 | 0 | 0 |
| Glutamate_byGLS_and_SLC1A3_Glutamate_NMDA_1_2B_complex | | 0 | 0.001 | 0 | 0 |
| Glutamate_byGLS_and_SLC1A7_Glutamate_NMDA_1_2B_complex | | 0.002 | 0 | 0 | 0 |
| Glutamate_byGLS2_and_SLC17A7_Glutamate_NMDA_1_2B_complex | | 0 | 0 | 0 | 0 |
| Glutamate_byGLS2_and_SLC17A8_Glutamate_NMDA_1_2B_complex | | 0 | 0 | 0 | 0 |
| Glutamate_byGLS2_and_SLC1A1_Glutamate_NMDA_1_2B_complex | | 0 | 0 | 0 | 0 |
| Glutamate_byGLS2_and_SLC1A2_Glutamate_NMDA_1_2B_complex | | 0 | 0 | 0 | 0 |
| Glutamate_byGLS2_and_SLC1A3_Glutamate_NMDA_1_2B_complex | | 0 | 0 | 0 | 0 |
| Glutamate_byGLS2_and_SLC1A7_Glutamate_NMDA_1_2B_complex | | 0 | 0 | 0 | 0 |
| Glutamate_byGLS_and_SLC17A7_Glutamate_NMDA_1_2C_complex | | 0 | 0.003 | 0 | 0 |
| Glutamate_byGLS_and_SLC17A8_Glutamate_NMDA_1_2C_complex | | 0 | 0 | 0 | 0 |
| Glutamate_byGLS_and_SLC1A1_Glutamate_NMDA_1_2C_complex | | 0 | 0 | 0 | 0 |
| Glutamate_byGLS_and_SLC1A2_Glutamate_NMDA_1_2C_complex | | 0 | 0 | 0 | 0 |
| Glutamate_byGLS_and_SLC1A3_Glutamate_NMDA_1_2C_complex | | 0 | 0.001 | 0 | 0 |
| Glutamate_byGLS_and_SLC1A7_Glutamate_NMDA_1_2C_complex | | 0.002 | 0 | 0 | 0 |
| Glutamate_byGLS2_and_SLC17A7_Glutamate_NMDA_1_2C_complex | | 0 | 0 | 0 | 0 |
| Glutamate_byGLS2_and_SLC17A8_Glutamate_NMDA_1_2C_complex | | 0 | 0 | 0 | 0 |
| Glutamate_byGLS2_and_SLC1A1_Glutamate_NMDA_1_2C_complex | | 0 | 0 | 0 | 0 |
| Glutamate_byGLS2_and_SLC1A2_Glutamate_NMDA_1_2C_complex | | 0 | 0 | 0 | 0 |
| Glutamate_byGLS2_and_SLC1A3_Glutamate_NMDA_1_2C_complex | | 0 | 0 | 0 | 0 |
| Glutamate_byGLS2_and_SLC1A7_Glutamate_NMDA_1_2C_complex | | 0 | 0 | 0 | 0 |
| Glutamate_byGLS_and_SLC17A7_Glutamate_NMDA_1_2D_complex | | 0 | 0.003 | 0 | 0 |
| Glutamate_byGLS_and_SLC17A8_Glutamate_NMDA_1_2D_complex | | 0 | 0 | 0 | 0 |
| Glutamate_byGLS_and_SLC1A1_Glutamate_NMDA_1_2D_complex | | 0 | 0 | 0 | 0 |
| Glutamate_byGLS_and_SLC1A2_Glutamate_NMDA_1_2D_complex | | 0 | 0 | 0 | 0 |
| Glutamate_byGLS_and_SLC1A3_Glutamate_NMDA_1_2D_complex | | 0 | 0.001 | 0 | 0 |
| Glutamate_byGLS_and_SLC1A7_Glutamate_NMDA_1_2D_complex | | 0.002 | 0 | 0 | 0 |
| Glutamate_byGLS2_and_SLC17A7_Glutamate_NMDA_1_2D_complex | | 0 | 0 | 0 | 0 |
| Glutamate_byGLS2_and_SLC17A8_Glutamate_NMDA_1_2D_complex | | 0 | 0 | 0 | 0 |
| Glutamate_byGLS2_and_SLC1A1_Glutamate_NMDA_1_2D_complex | | 0 | 0 | 0 | 0 |
| Glutamate_byGLS2_and_SLC1A2_Glutamate_NMDA_1_2D_complex | | 0 | 0 | 0 | 0 |
| Glutamate_byGLS2_and_SLC1A3_Glutamate_NMDA_1_2D_complex | | 0 | 0 | 0 | 0 |
| Glutamate_byGLS2_and_SLC1A7_Glutamate_NMDA_1_2D_complex | | 0 | 0 | 0 | 0 |
| Glutamate_byGLS_and_SLC17A7_GRM1 | | 0 | 0.019 | 0 | 0 |
| Glutamate_byGLS_and_SLC17A8_GRM1 | | 0 | 0 | 0 | 0 |
| Glutamate_byGLS_and_SLC1A1_GRM1 | | 0 | 0 | 0 | 0 |
| Glutamate_byGLS_and_SLC1A2_GRM1 | | 0 | 0 | 0 | 0 |
| Glutamate_byGLS_and_SLC1A3_GRM1 | | 0 | 0.017 | 0 | 0 |
| Glutamate_byGLS_and_SLC1A7_GRM1 | | 0.018 | 0 | 0 | 0 |
| Glutamate_byGLS2_and_SLC17A7_GRM1 | | 0 | 0 | 0 | 0 |
| Glutamate_byGLS2_and_SLC17A8_GRM1 | | 0 | 0 | 0 | 0 |
| Glutamate_byGLS2_and_SLC1A1_GRM1 | | 0 | 0 | 0 | 0 |
| Glutamate_byGLS2_and_SLC1A2_GRM1 | | 0 | 0 | 0 | 0 |
| Glutamate_byGLS2_and_SLC1A3_GRM1 | | 0 | 0 | 0 | 0 |
| Glutamate_byGLS2_and_SLC1A7_GRM1 | | 0 | 0 | 0 | 0 |
| Glutamate_byGLS_and_SLC17A7_GRM2 | | 0 | 0.003 | 0.003 | 0.003 |
| Glutamate_byGLS_and_SLC17A8_GRM2 | | 0 | 0 | 0.004 | 0.004 |
| Glutamate_byGLS_and_SLC1A1_GRM2 | | 0 | 0 | 0.109 | 0.108 |
| Glutamate_byGLS_and_SLC1A2_GRM2 | | 0 | 0 | 0.022 | 0.022 |
| Glutamate_byGLS_and_SLC1A3_GRM2 | | 0 | 0.001 | 0.01 | 0.01 |
| Glutamate_byGLS_and_SLC1A7_GRM2 | | 0.002 | 0 | 0.05 | 0.05 |
| Glutamate_byGLS2_and_SLC17A7_GRM2 | | 0 | 0 | 0.003 | 0.003 |
| Glutamate_byGLS2_and_SLC17A8_GRM2 | | 0 | 0 | 0.004 | 0.004 |
| Glutamate_byGLS2_and_SLC1A1_GRM2 | | 0 | 0 | 0.005 | 0.005 |
| Glutamate_byGLS2_and_SLC1A2_GRM2 | | 0 | 0 | 0.005 | 0.005 |
| Glutamate_byGLS2_and_SLC1A3_GRM2 | | 0 | 0 | 0.005 | 0.005 |
| Glutamate_byGLS2_and_SLC1A7_GRM2 | | 0 | 0 | 0.005 | 0.005 |
| Glutamate_byGLS_and_SLC17A7_GRM3 | | 0 | 0.017 | 0 | 0 |
| Glutamate_byGLS_and_SLC17A8_GRM3 | | 0 | 0 | 0 | 0 |
| Glutamate_byGLS_and_SLC1A1_GRM3 | | 0 | 0 | 0 | 0 |
| Glutamate_byGLS_and_SLC1A2_GRM3 | | 0 | 0 | 0 | 0 |
| Glutamate_byGLS_and_SLC1A3_GRM3 | | 0 | 0.015 | 0 | 0 |
| Glutamate_byGLS_and_SLC1A7_GRM3 | | 0.016 | 0 | 0 | 0 |
| Glutamate_byGLS2_and_SLC17A7_GRM3 | | 0 | 0 | 0 | 0 |
| Glutamate_byGLS2_and_SLC17A8_GRM3 | | 0 | 0 | 0 | 0 |
| Glutamate_byGLS2_and_SLC1A1_GRM3 | | 0 | 0 | 0 | 0 |
| Glutamate_byGLS2_and_SLC1A2_GRM3 | | 0 | 0 | 0 | 0 |
| Glutamate_byGLS2_and_SLC1A3_GRM3 | | 0 | 0 | 0 | 0 |
| Glutamate_byGLS2_and_SLC1A7_GRM3 | | 0 | 0 | 0 | 0 |
| Glutamate_byGLS_and_SLC17A7_GRM4 | | 0 | 0.003 | 0 | 0 |
| Glutamate_byGLS_and_SLC17A8_GRM4 | | 0 | 0 | 0 | 0 |
| Glutamate_byGLS_and_SLC1A1_GRM4 | | 0 | 0 | 0 | 0 |
| Glutamate_byGLS_and_SLC1A2_GRM4 | | 0 | 0 | 0 | 0 |
| Glutamate_byGLS_and_SLC1A3_GRM4 | | 0 | 0.001 | 0 | 0 |
| Glutamate_byGLS_and_SLC1A7_GRM4 | | 0.003 | 0 | 0 | 0 |
| Glutamate_byGLS2_and_SLC17A7_GRM4 | | 0 | 0 | 0 | 0 |
| Glutamate_byGLS2_and_SLC17A8_GRM4 | | 0 | 0 | 0 | 0 |
| Glutamate_byGLS2_and_SLC1A1_GRM4 | | 0 | 0 | 0 | 0 |
| Glutamate_byGLS2_and_SLC1A2_GRM4 | | 0 | 0 | 0 | 0 |
| Glutamate_byGLS2_and_SLC1A3_GRM4 | | 0 | 0 | 0 | 0 |
| Glutamate_byGLS2_and_SLC1A7_GRM4 | | 0 | 0 | 0 | 0 |
| Glutamate_byGLS_and_SLC17A7_GRM5 | | 0 | 0.01 | 0 | 0 |
| Glutamate_byGLS_and_SLC17A8_GRM5 | | 0 | 0 | 0 | 0 |
| Glutamate_byGLS_and_SLC1A1_GRM5 | | 0 | 0 | 0 | 0 |
| Glutamate_byGLS_and_SLC1A2_GRM5 | | 0 | 0 | 0 | 0 |
| Glutamate_byGLS_and_SLC1A3_GRM5 | | 0 | 0.008 | 0 | 0 |
| Glutamate_byGLS_and_SLC1A7_GRM5 | | 0.009 | 0 | 0 | 0 |
| Glutamate_byGLS2_and_SLC17A7_GRM5 | | 0 | 0 | 0 | 0 |
| Glutamate_byGLS2_and_SLC17A8_GRM5 | | 0 | 0 | 0 | 0 |
| Glutamate_byGLS2_and_SLC1A1_GRM5 | | 0 | 0 | 0 | 0 |
| Glutamate_byGLS2_and_SLC1A2_GRM5 | | 0 | 0 | 0 | 0 |
| Glutamate_byGLS2_and_SLC1A3_GRM5 | | 0 | 0 | 0 | 0 |
| Glutamate_byGLS2_and_SLC1A7_GRM5 | | 0 | 0 | 0 | 0 |
| Glutamate_byGLS_and_SLC17A7_GRM6 | | 0 | 0.003 | 0 | 0 |
| Glutamate_byGLS_and_SLC17A8_GRM6 | | 0 | 0 | 0 | 0 |
| Glutamate_byGLS_and_SLC1A1_GRM6 | | 0 | 0 | 0 | 0 |
| Glutamate_byGLS_and_SLC1A2_GRM6 | | 0 | 0 | 0 | 0 |
| Glutamate_byGLS_and_SLC1A3_GRM6 | | 0 | 0 | 0 | 0 |
| Glutamate_byGLS_and_SLC1A7_GRM6 | | 0.002 | 0 | 0 | 0 |
| Glutamate_byGLS2_and_SLC17A7_GRM6 | | 0 | 0 | 0 | 0 |
| Glutamate_byGLS2_and_SLC17A8_GRM6 | | 0 | 0 | 0 | 0 |
| Glutamate_byGLS2_and_SLC1A1_GRM6 | | 0 | 0 | 0 | 0 |
| Glutamate_byGLS2_and_SLC1A2_GRM6 | | 0 | 0 | 0 | 0 |
| Glutamate_byGLS2_and_SLC1A3_GRM6 | | 0 | 0 | 0 | 0 |
| Glutamate_byGLS2_and_SLC1A7_GRM6 | | 0 | 0 | 0 | 0 |
| Glutamate_byGLS_and_SLC17A7_GRM7 | | 0 | 0.034 | 0.003 | 0 |
| Glutamate_byGLS_and_SLC17A8_GRM7 | | 0 | 0 | 0.004 | 0 |
| Glutamate_byGLS_and_SLC1A1_GRM7 | | 0 | 0 | 0.108 | 0 |
| Glutamate_byGLS_and_SLC1A2_GRM7 | | 0 | 0 | 0.021 | 0 |
| Glutamate_byGLS_and_SLC1A3_GRM7 | | 0 | 0.032 | 0.009 | 0 |
| Glutamate_byGLS_and_SLC1A7_GRM7 | | 0.034 | 0 | 0.049 | 0 |
| Glutamate_byGLS2_and_SLC17A7_GRM7 | | 0 | 0 | 0.003 | 0 |
| Glutamate_byGLS2_and_SLC17A8_GRM7 | | 0 | 0 | 0.004 | 0 |
| Glutamate_byGLS2_and_SLC1A1_GRM7 | | 0 | 0 | 0.005 | 0 |
| Glutamate_byGLS2_and_SLC1A2_GRM7 | | 0 | 0 | 0.005 | 0 |
| Glutamate_byGLS2_and_SLC1A3_GRM7 | | 0 | 0 | 0.005 | 0 |
| Glutamate_byGLS2_and_SLC1A7_GRM7 | | 0 | 0 | 0.005 | 0 |
| Glutamate_byGLS_and_SLC17A7_GRM8 | | 0 | 0.024 | 0 | 0 |
| Glutamate_byGLS_and_SLC17A8_GRM8 | | 0 | 0 | 0 | 0 |
| Glutamate_byGLS_and_SLC1A1_GRM8 | | 0 | 0 | 0 | 0 |
| Glutamate_byGLS_and_SLC1A2_GRM8 | | 0 | 0 | 0 | 0 |
| Glutamate_byGLS_and_SLC1A3_GRM8 | | 0 | 0.022 | 0 | 0 |
| Glutamate_byGLS_and_SLC1A7_GRM8 | | 0.024 | 0 | 0 | 0 |
| Glutamate_byGLS2_and_SLC17A7_GRM8 | | 0 | 0 | 0 | 0 |
| Glutamate_byGLS2_and_SLC17A8_GRM8 | | 0 | 0 | 0 | 0 |
| Glutamate_byGLS2_and_SLC1A1_GRM8 | | 0 | 0 | 0 | 0 |
| Glutamate_byGLS2_and_SLC1A2_GRM8 | | 0 | 0 | 0 | 0 |
| Glutamate_byGLS2_and_SLC1A3_GRM8 | | 0 | 0 | 0 | 0 |
| Glutamate_byGLS2_and_SLC1A7_GRM8 | | 0 | 0 | 0 | 0 |
| Glycine_bySHMT1_and_SLC6A5_Glycine_a1b_complex | | 0 | 0 | 0 | 0 |
| Glycine_bySHMT1_and_SLC6A9_Glycine_a1b_complex | | 0.001 | 0 | 0 | 0 |
| Glycine_bySHMT2_and_SLC6A5_Glycine_a1b_complex | | 0 | 0 | 0 | 0 |
| Glycine_bySHMT2_and_SLC6A9_Glycine_a1b_complex | | 0.001 | 0 | 0 | 0 |
| Glycine_bySHMT1_and_SLC6A5_Glycine_a2_complex | | 0 | 0 | 0 | 0 |
| Glycine_bySHMT1_and_SLC6A9_Glycine_a2_complex | | 0.003 | 0 | 0 | 0 |
| Glycine_bySHMT2_and_SLC6A5_Glycine_a2_complex | | 0 | 0 | 0 | 0 |
| Glycine_bySHMT2_and_SLC6A9_Glycine_a2_complex | | 0.003 | 0 | 0 | 0 |
| GAS6_AXL | | 0 | 0 | 0 | 0 |
| GAS6_TYRO3 | | 0 | 0 | 0 | 0.007 |
| TULP1_TYRO3 | | 0 | 0 | 0 | 0.005 |
| GDF10_ACVR_1B2B_receptor | | 0 | 0 | 0.004 | 0.004 |
| GDF11_ACVR_1B2B_receptor | | 0.082 | 0.111 | 0.022 | 0.021 |
| MSTN_ACVR_1B2B_receptor | | 0 | 0 | 0.005 | 0.004 |
| Activin_ligand_ab_ACVR_1B2B_receptor | | 0 | 0 | 0.083 | 0.083 |
| INHA_ACVR_1B2B_receptor | | 0 | 0 | 0.087 | 0.087 |
| Inhibin_ligand_A_ACVR_1B2B_receptor | | 0 | 0 | 0.087 | 0.087 |
| Inhibin_ligand_B_ACVR_1B2B_receptor | | 0 | 0 | 0.083 | 0.083 |
| GDF11_ACVR_1B2A_receptor | | 0.086 | 0.114 | 0.024 | 0.018 |
| Activin_ligand_ab_ACVR_1B2A_receptor | | 0 | 0 | 0.085 | 0.08 |
| INHA_ACVR_1B2A_receptor | | 0 | 0 | 0.089 | 0.084 |
| Inhibin_ligand_A_ACVR_1B2A_receptor | | 0 | 0 | 0.089 | 0.084 |
| Inhibin_ligand_B_ACVR_1B2A_receptor | | 0 | 0 | 0.085 | 0.08 |
| GDF11_TGFR_AVR2A | | 0.074 | 0.103 | 0.024 | 0.018 |
| MSTN_TGFR_AVR2A | | 0 | 0 | 0.007 | 0.001 |
| GDF11_TGFR_AVR2B | | 0.074 | 0.103 | 0.022 | 0.021 |
| MSTN_TGFR_AVR2B | | 0 | 0 | 0.005 | 0.004 |
| GDF9_TGFR_BMPR2 | | 0.041 | 0 | 0.057 | 0.085 |
| GHRH_GHRHR | | 0 | 0 | 0 | 0 |
| GHRL_GHRHR | | 0 | 0.001 | 0 | 0 |
| GHRL_GHSR | | 0 | 0 | 0 | 0 |
| GHRL_GPR39 | | 0 | 0.053 | 0 | 0 |
| Histamine_byHDC_HRH1 | | 0 | 0 | 0 | 0 |
| Histamine_byHDC_HRH2 | | 0 | 0 | 0.002 | 0.001 |
| HLA-A_KIR3DL1 | | 11.005 | 12.047 | 0 | 0 |
| HLA-F_KIR3DL1 | | 1.278 | 1.422 | 0 | 0 |
| HLA-B_KIR3DL2 | | 20.76 | 30.073 | 4.302 | 4.293 |
| HLA-F_KIR3DL2 | | 1.278 | 1.422 | 0.259 | 0.25 |
| HLA-C_KIR2DL1 | | 0 | 0 | 2.734 | 2.732 |
| HLA-C_KIR2DL3 | | 12.961 | 29.651 | 0 | 0 |
| HLA-E_KLRC1 | | 7.817 | 8.295 | 1.138 | 1.063 |
| HLA-E_CD94:NKG2A | | 7.817 | 8.295 | 1.103 | 0.989 |
| HLA-E_KLRC2 | | 7.818 | 8.295 | 0.918 | 0.899 |
| HLA-E_CD94:NKG2C | | 7.818 | 8.295 | 0.918 | 0.899 |
| HLA-E_CD94:NKG2E | | 7.817 | 8.295 | 0.902 | 0.9 |
| HLA-E_KLRK1 | | 0 | 0 | 1.373 | 1.21 |
| HLA-E_VSIR | | 7.821 | 8.299 | 1.782 | 1.665 |
| HLA-F_VSIR | | 1.282 | 1.426 | 1.13 | 1.013 |
| HLA-F_LILRB1 | | 1.278 | 1.422 | 0 | 0 |
| HLA-G_LILRB1 | | 0.037 | 0.047 | 0 | 0 |
| HLA-F_LILRB2 | | 1.278 | 1.422 | 0 | 0 |
| HLA-G_LILRB2 | | 0.037 | 0.047 | 0 | 0 |
| CD1D_LILRB2 | | 0 | 0 | 0 | 0 |
| Activin_ligand_ab_ACVR_1C2A_receptor | | 0 | 0 | 0.085 | 0.08 |
| INHA_ACVR_1C2A_receptor | | 0 | 0 | 0.089 | 0.084 |
| Inhibin_ligand_A_ACVR_1C2A_receptor | | 0 | 0 | 0.089 | 0.084 |
| Inhibin_ligand_B_ACVR_1C2A_receptor | | 0 | 0 | 0.085 | 0.08 |
| Activin_ligand_ab_ACVR_1C2B_receptor | | 0 | 0 | 0.083 | 0.083 |
| INHA_ACVR_1C2B_receptor | | 0 | 0 | 0.087 | 0.087 |
| Inhibin_ligand_A_ACVR_1C2B_receptor | | 0 | 0 | 0.087 | 0.087 |
| Inhibin_ligand_B_ACVR_1C2B_receptor | | 0 | 0 | 0.083 | 0.083 |
| INSL3_RXFP2 | | 0 | 0.001 | 0 | 0 |
| RLN1_RXFP2 | | 0.016 | 0.037 | 0 | 0 |
| RLN2_RXFP2 | | 0.024 | 0.047 | 0 | 0 |
| RLN3_RXFP2 | | 0 | 0 | 0 | 0 |
| INSL5_RXFP4 | | 0 | 0 | 0 | 0 |
| KNG1_RXFP4 | | 0 | 0 | 0 | 0 |
| RLN3_RXFP4 | | 0 | 0 | 0 | 0 |
| IGF1_IGF1R_enhancerComGPC3 | | 0 | 0 | 0.102 | 0 |
| IGF1_IGF1R | | 0 | 0 | 0.113 | 0 |
| IGF2_IGF1R | | 0 | 0 | 3.029 | 0 |
| IGF1_integrin_a6b4_complex | | 0 | 0 | 0.106 | 0 |
| NRG1_integrin_a6b4_complex | | 0 | 0 | 0.042 | 0 |
| IGF2_IGF2R | | 0 | 0 | 3.349 | 3.288 |
| IGFBP3_TMEM219 | | 0.706 | 0.737 | 1.457 | 1.233 |
| IGFL2_IGFLR1 | | 0 | 0 | 0.502 | 0.705 |
| IFNA5_Type_I_IFNR | | 0 | 0 | 0.165 | 0.121 |
| IFNK_Type_I_IFNR | | 0 | 0 | 0.165 | 0.12 |
| IFNG_Type_II_IFNR | | 1.359 | 0.753 | 0.004 | 0.002 |
| IFNL1_Type_III_IFNR | | 0.061 | 0.038 | 0.012 | 0.004 |
| IL35_IL35_receptor | | 0 | 0.004 | 0.136 | 0.128 |
| IL27_IL27_receptor | | 0 | 0 | 0.136 | 0.128 |
| IL10_IL10_receptor | | 0 | 0.003 | 0.16 | 0.121 |
| IL11_IL11_receptor | | 0.098 | 0.096 | 0.016 | 0.012 |
| IL12_IL12_receptor | | 0 | 0 | 0.281 | 0.338 |
| IL23_IL23_receptor | | 0 | 0 | 0.355 | 0.154 |
| IL13_IL13_receptor | | 0 | 0 | 0 | 0 |
| IL4_IL13_receptor | | 0.031 | 0 | 0 | 0 |
| IL13_IL13RA2 | | 0 | 0 | 0 | 0 |
| IL15_IL15_receptor | | 0.064 | 0.075 | 0.111 | 0.117 |
| IL17_AF_IL17_receptor_AC | | 0 | 0.059 | 0 | 0.001 |
| IL17F_IL17_receptor_AC | | 0 | 0.059 | 0 | 0.001 |
| IL17C_IL17_receptor_AE | | 0.073 | 0.063 | 0.114 | 0.098 |
| IL18_IL18_receptor | | 0.002 | 0 | 0.291 | 0.293 |
| IL19_IL20_receptor_Type_I | | 0.012 | 0.005 | 0 | 0 |
| IL20_IL20_receptor_Type_I | | 0 | 0 | 0 | 0 |
| IL24_IL20_receptor_Type_I | | 0 | 0.004 | 0 | 0 |
| IL1A_IL1_receptor | | 0 | 0 | 0 | 0.003 |
| IL1B_IL1_receptor | | 0 | 0 | 0 | 0.004 |
| IL1RN_IL1_receptor | | 0 | 0 | 0 | 0.072 |
| IL1A_IL1_receptor_inhibitor | | 0 | 0 | 0 | 0.003 |
| IL1B_IL1_receptor_inhibitor | | 0 | 0 | 0 | 0.004 |
| IL1RN_IL1_receptor_inhibitor | | 0 | 0 | 0 | 0.072 |
| IL1F10_IL36_receptor | | 0 | 0 | 0.001 | 0 |
| IL1RAP_PTPRF | | 0.311 | 0.301 | 0 | 0 |
| LRRC4B_PTPRF | | 0 | 0 | 0 | 0 |
| LRRC4C_PTPRF | | 0.299 | 0 | 0 | 0 |
| LRFN4_PTPRF | | 0.337 | 0.314 | 0 | 0 |
| LRFN5_PTPRF | | 0 | 0 | 0 | 0 |
| IL2_IL2_receptor_HA | | 0.066 | 0.035 | 0.044 | 0.029 |
| IL2_IL2_receptor_I | | 0.066 | 0.035 | 0.482 | 0.522 |
| IL20_IL20_receptor_Type_II | | 0 | 0 | 0 | 0 |
| IL24_IL20_receptor_Type_II | | 0 | 0.004 | 0 | 0 |
| IL22_IL22_receptor | | 0.287 | 0.035 | 0 | 0 |
| IL26_IL26_receptor | | 0.102 | 0.036 | 0 | 0 |
| IL33_IL33_receptor | | 0.002 | 0 | 0.004 | 0.002 |
| IL4_IL4_receptor | | 0.031 | 0 | 0.116 | 0.145 |
| IL5_IL5_receptor | | 0 | 0 | 0 | 0 |
| IL6_IL6_receptor | | 0 | 0 | 0.021 | 0.001 |
| IL7_IL7_receptor | | 0 | 0 | 3.226 | 3.129 |
| RAET1E_NKG2D_II_receptor | | 0 | 0 | 0.476 | 0.313 |
| RAET1G_NKG2D_II_receptor | | 0 | 0 | 0.476 | 0.314 |
| RAET1L_NKG2D_II_receptor | | 0 | 0 | 0.476 | 0.313 |
| ULBP1_NKG2D_II_receptor | | 0 | 0 | 0.476 | 0.313 |
| ULBP2_NKG2D_II_receptor | | 0 | 0 | 0.476 | 0.314 |
| ULBP3_NKG2D_II_receptor | | 0 | 0 | 0.476 | 0.313 |
| MICA_NKG2D_II_receptor | | 0 | 0 | 0.496 | 0.334 |
| MICB_NKG2D_II_receptor | | 0 | 0 | 0.481 | 0.318 |
| KNG1_BDKRB1 | | 0 | 0 | 0 | 0 |
| KNG1_BDKRB2 | | 0 | 0 | 0 | 0 |
| LEFTY1_TDGF1 | | 0 | 0 | 0 | 0 |
| LEFTY2_TDGF1 | | 0 | 0 | 0 | 0 |
| CLEC2B_KLRF1 | | 1.202 | 1.642 | 0.06 | 0.024 |
| LRRC4B_PTPRD | | 0 | 0 | 0 | 0 |
| LRFN4_PTPRD | | 0.23 | 0.207 | 0 | 0 |
| LRFN5_PTPRD | | 0 | 0 | 0 | 0 |
| NLGN3_PTPRD | | 0.196 | 0 | 0 | 0 |
| SLITRK1_PTPRD | | 0 | 0 | 0 | 0 |
| SLITRK3_PTPRD | | 0 | 0 | 0 | 0 |
| LeukotrieneE4_byDPEP1_CYSLTR1 | 0 | | 0.003 | 0 | 0.002 |
| LeukotrieneE4_byDPEP2_CYSLTR1 | 0.043 | | 0.01 | 0 | 0.002 |
| LeukotrieneE4_byDPEP3_CYSLTR1 | 0 | | 0 | 0 | 0.002 |
| LTD4_byGGT1_CYSLTR1 | 0 | | 0 | 0 | 0.003 |
| LeukotrieneD4_byGGT1_CYSLTR1 | 0 | | 0 | 0 | 0.003 |
| LTC4_byLTC4S_CYSLTR1 | 0.065 | | 0.141 | 0 | 0.005 |
| LipoxinA4_byALOX12_CYSLTR1 | 0 | | 0 | 0 | 0.002 |
| LeukotrieneC4_byLTC4S_CYSLTR1 | 0.001 | | 0 | 0 | 0.002 |
| LipoxinA4_byALOX5_CYSLTR1 | 0.001 | | 0 | 0 | 0.002 |
| LeukotrieneE4_byDPEP1_CYSLTR2 | 0 | | 0.003 | 0.004 | 0.004 |
| LeukotrieneE4_byDPEP2_CYSLTR2 | 0.043 | | 0.009 | 0.004 | 0.004 |
| LeukotrieneE4_byDPEP3_CYSLTR2 | 0 | | 0 | 0.004 | 0.004 |
| LTD4_byGGT1_CYSLTR2 | 0 | | 0 | 0.005 | 0.006 |
| LeukotrieneD4_byGGT1_CYSLTR2 | 0 | | 0 | 0.005 | 0.006 |
| LTC4_byLTC4S_CYSLTR2 | 0.065 | | 0.14 | 0.007 | 0.008 |
| LeukotrieneC4_byLTC4S_CYSLTR2 | 0.001 | | 0 | 0.004 | 0.004 |
| LeukotrieneD4_byGGT1_GPR17 | 0 | | 0 | 0 | 0 |
| LeukotrieneB4_byLTA4H_GPR17 | 0.188 | | 0.109 | 0 | 0 |
| LeukotrieneC4_byLTC4S_GPR17 | 0.001 | | 0 | 0 | 0 |
| LeukotrieneB4_byLTA4H_LTB4R | 0.193 | | 0.113 | 0.178 | 0.173 |
| 12oxoLeukotrieneB4_byPTGR1_LTB4R | 0.006 | | 0 | 1.842 | 1.837 |
| LeukotrieneB4_byLTA4H_LTB4R2 | 0.197 | | 0.117 | 0.252 | 0.207 |
| 12oxoLeukotrieneB4_byPTGR1_LTB4R2 | 0.01 | | 0 | 1.916 | 1.871 |
| LTB_LTBR | 13.748 | | 12.031 | 0 | 0 |
| TNFSF14_LTBR | 1.006 | | 1.222 | 0 | 0 |
| 5SHpETE_byALOX5_OXER1 | 0.012 | | 0 | 0 | 0 |
| XCL1_XCR1 | 0.688 | | 0.081 | 0 | 0 |
| XCL2_XCR1 | 0.416 | | 0.032 | 0 | 0 |
| LPAR1_ADGRE5 | 0.026 | | 0 | 1.469 | 1.501 |
| LPAR2_ADGRE5 | 0.221 | | 0.32 | 1.472 | 1.504 |
| LPAR3_ADGRE5 | 0.026 | | 0 | 1.469 | 1.501 |
| THY1_ADGRE5 | 0.029 | | 0.027 | 1.469 | 1.501 |
| integrin_aVb1_complex_ADGRE5 | 0.075 | | 0.025 | 1.746 | 1.778 |
| integrin_aVb3_complex_ADGRE5 | 0 | | 0 | 1.473 | 1.505 |
| CD55_ADGRE5 | 0.801 | | 1.619 | 1.512 | 1.544 |
| SFTPD_ADGRE5 | 0.025 | | 0 | 1.474 | 1.506 |
| Melatonin_byASMT_MTNR1A | 0.004 | | 0 | 0 | 0 |
| Melatonin_byASMT_MTNR1B | 0.004 | | 0 | 0 | 0 |
| MDK_ALK | 0 | | 0 | 0 | 0 |
| PTN_ALK | 0 | | 0 | 0 | 0 |
| MDK_PTPRZ1 | 0 | | 0 | 0 | 0 |
| PTN_PTPRZ1 | 0 | | 0 | 0 | 0 |
| AMH_MIS_receptor_3 | 0.007 | | 0.003 | 0 | 0 |
| AMH_MIS_receptor_1 | 0.007 | | 0.003 | 0 | 0 |
| AMH_MIS_receptor_2 | 0.007 | | 0.003 | 0 | 0 |
| NECTIN3_PVR | 0.14 | | 0.128 | 0 | 0 |
| NTN1_DCC | 0 | | 0 | 0 | 0 |
| NTN1_DSCAM | 0 | | 0 | 0.033 | 0.031 |
| NTN1_UNC5B | 0 | | 0 | 0 | 0 |
| NTN4_UNC5B | 0.114 | | 0.097 | 0 | 0 |
| NTN1_UNC5C | 0 | | 0 | 0.029 | 0 |
| NTN4_UNC5D | 0.114 | | 0.097 | 0 | 0 |
| NRXN1_DAG1 | 0.251 | | 0 | 0.024 | 0.005 |
| NRXN2_DAG1 | 0 | | 0 | 0.024 | 0.005 |
| NMU_NMUR1 | 0.015 | | 0.007 | 0.104 | 0.053 |
| NPB_NPBWR1 | 0 | | 0 | 0 | 0 |
| NPW_NPBWR1 | 0 | | 0 | 0 | 0 |
| NPFF_NPFFR1 | 0.005 | | 0.005 | 0 | 0 |
| NPFF_NPFFR2 | 0.02 | | 0.02 | 0 | 0 |
| NPPA_NPR1 | 0 | | 0 | 0 | 0 |
| NTS_NTSR1 | 0.001 | | 0 | 0.458 | 0 |
| NRTN_RET_receptor_2 | 0 | | 0.001 | 0 | 0 |
| NTF3_NTRK3 | 0 | | 0 | 0 | 0 |
| PTPRS_NTRK3 | 0 | | 0 | 0 | 0 |
| NODAL_NODAL_receptor_IbIIa_TDGF1 | 0 | | 0 | 0 | 0 |
| NODAL_NODAL_receptor_IbIIb_TDGF1 | 0 | | 0 | 0 | 0 |
| NODAL_NODAL_receptor_IcIIb_TDGF1 | 0 | | 0 | 0 | 0 |
| CNTN1_NOTCH1 | 0 | | 0 | 0.083 | 0.077 |
| DLK1_NOTCH1 | 0 | | 0 | 0.155 | 0.149 |
| DLL1_NOTCH1 | 0.027 | | 0.023 | 0.079 | 0.073 |
| DLL3_NOTCH1 | 0.027 | | 0.024 | 0.078 | 0.073 |
| DLL4_NOTCH1 | 0 | | 0 | 0.081 | 0.075 |
| JAG1_NOTCH1 | 0 | | 0 | 0.227 | 0.221 |
| JAG2_NOTCH1 | 0.038 | | 0.026 | 0.081 | 0.075 |
| CNTN1_NOTCH2 | 0 | | 0 | 0.082 | 0.055 |
| DLK1_NOTCH2 | 0 | | 0 | 0.153 | 0.126 |
| DLL1_NOTCH2 | 0.142 | | 0.137 | 0.078 | 0.051 |
| DLL3_NOTCH2 | 0.142 | | 0.138 | 0.077 | 0.05 |
| DLL4_NOTCH2 | 0 | | 0 | 0.08 | 0.053 |
| JAG1_NOTCH2 | 0 | | 0 | 0.226 | 0.199 |
| JAG2_NOTCH2 | 0.152 | | 0.14 | 0.08 | 0.053 |
| CNTN1_MCAM | 0 | | 0 | 0.058 | 0 |
| CNTN1_NRCAM | 0 | | 0 | 0 | 0 |
| DLK1_NOTCH3 | 0 | | 0 | 0 | 0 |
| DLL1_NOTCH3 | 0.006 | | 0.001 | 0 | 0 |
| DLL3_NOTCH3 | 0.006 | | 0.003 | 0 | 0 |
| DLL4_NOTCH3 | 0 | | 0 | 0 | 0 |
| JAG1_NOTCH3 | 0 | | 0 | 0 | 0 |
| JAG2_NOTCH3 | 0.017 | | 0.004 | 0 | 0 |
| DLK1_NOTCH4 | 0 | | 0 | 0 | 0 |
| DLL1_NOTCH4 | 0.015 | | 0.01 | 0 | 0 |
| DLL3_NOTCH4 | 0.015 | | 0.012 | 0 | 0 |
| DLL4_NOTCH4 | 0 | | 0 | 0 | 0 |
| JAG1_NOTCH4 | 0 | | 0 | 0 | 0 |
| JAG2_NOTCH4 | 0.025 | | 0.013 | 0 | 0 |
| JAG1_CD46 | 0 | | 0 | 0.577 | 0.605 |
| JAG1_VASN | 0 | | 0 | 0.154 | 0.15 |
| JAG2_VASN | 0.529 | | 0.516 | 0.008 | 0.004 |
| OSM_LIFR | 0.65 | | 0.37 | 0 | 0 |
| LIF_LIFR | 0.026 | | 0.012 | 0 | 0 |
| OSM_OSMR | 0.653 | | 0.372 | 0 | 0 |
| b-Endorphin_byPOMC_OPRD1 | 0.031 | | 0.063 | 0 | 0 |
| b-Endorphin_byPOMC_OPRM1 | 0 | | 0 | 0.004 | 0.003 |
| HCRT_HCRTR1 | 0 | | 0 | 0.002 | 0 |
| HCRT_HCRTR2 | 0 | | 0.003 | 0 | 0 |
| OXT_AVPR1A | 0.01 | | 0.01 | 0 | 0 |
| AVP_AVPR1A | 0 | | 0 | 0 | 0 |
| OXT_AVPR1B | 0.002 | | 0.002 | 0 | 0 |
| AVP_AVPR1B | 0 | | 0 | 0 | 0 |
| OXT_AVPR2 | 0.003 | | 0.003 | 0 | 0 |
| AVP_AVPR2 | 0 | | 0 | 0 | 0 |
| OXT_OXTR | 0.022 | | 0.022 | 0 | 0 |
| AVP_OXTR | 0 | | 0 | 0 | 0 |
| PTH_PTH1R | 0 | | 0 | 0 | 0 |
| PTHLH_PTH1R | 0 | | 0 | 0 | 0 |
| PTH_PTH2R | 0 | | 0 | 0 | 0 |
| PTHLH_PTH2R | 0 | | 0 | 0 | 0 |
| ADCYAP1_ADCYAP1R1 | 0 | | 0 | 0 | 0 |
| VIP_ADCYAP1R1 | 0 | | 0 | 0 | 0 |
| ADCYAP1_VIPR1 | 0 | | 0 | 0.019 | 0.012 |
| SCT_VIPR1 | 0 | | 0 | 0.019 | 0.012 |
| VIP_VIPR1 | 0 | | 0 | 0.029 | 0.022 |
| ADCYAP1_VIPR2 | 0 | | 0 | 0.005 | 0.029 |
| SCT_VIPR2 | 0 | | 0 | 0.005 | 0.029 |
| VIP_VIPR2 | 0 | | 0 | 0.016 | 0.04 |
| PGF_FLT1 | 0.005 | | 0 | 0.009 | 0.009 |
| VEGFA_FLT1 | 0.001 | | 0 | 0.482 | 0.482 |
| VEGFB_FLT1 | 0.474 | | 0.566 | 1.223 | 1.223 |
| PGF_FLT1_complex | 0.005 | | 0 | 0 | 0 |
| VEGFA_FLT1_complex | 0.001 | | 0 | 0 | 0 |
| VEGFB_FLT1_complex | 0.474 | | 0.566 | 0 | 0 |
| PGF_NRP1 | 0.133 | | 0 | 0 | 0 |
| SEMA3A_NRP1 | 0 | | 0 | 0 | 0 |
| VEGFA_NRP1 | 0.129 | | 0 | 0 | 0 |
| VEGFB_NRP1 | 0.601 | | 0.694 | 0 | 0 |
| PGF_NRP2 | 0.006 | | 0 | 0 | 0 |
| SEMA3C_NRP2 | 0 | | 0 | 0 | 0 |
| SEMA3F_NRP2 | 0 | | 0 | 0 | 0 |
| VEGFA_NRP2 | 0.002 | | 0 | 0 | 0 |
| PLAU_PLAUR | 0 | | 0 | 0.14 | 0.089 |
| PDGFA_PDGFRA | 0.352 | | 0 | 0.044 | 0 |
| PDGFB_PDGFRA | 0.4 | | 0.356 | 0.036 | 0 |
| PDGFC_PDGFRA | 0 | | 0 | 0.119 | 0 |
| PDGFB_PDGFR_complex | 0.065 | | 0.021 | 0 | 0 |
| PDGFD_PDGFR_complex | 0.018 | | 0.026 | 0 | 0 |
| PDGFB_PDGFRB | 0.065 | | 0.021 | 0 | 0 |
| PDGFD_PDGFRB | 0.018 | | 0.026 | 0 | 0 |
| PODXL_SELL | 0 | | 0 | 0.019 | 0.005 |
| PODXL2_SELL | 0.002 | | 0.003 | 0.042 | 0.028 |
| SELPLG_SELL | 0.71 | | 0.91 | 0.017 | 0.003 |
| PODXL2_SELP | 0.001 | | 0.003 | 0.028 | 0 |
| SELPLG_SELP | 0.709 | | 0.909 | 0.003 | 0 |
| CD24_SELP | 0 | | 0 | 1.282 | 0 |
| PVR_CD226 | 0 | | 0 | 0.343 | 0.231 |
| PVR_CD96 | 0 | | 0 | 1.591 | 2.036 |
| GCG_GCGR | 0 | | 0 | 0 | 0 |
| GCG_GLP1R | 0 | | 0 | 0 | 0.003 |
| GCG_GLP2R | 0 | | 0 | 0 | 0 |
| PMCH_MCHR1 | 0 | | 0 | 0 | 0 |
| PMCH_MCHR2 | 0 | | 0 | 0 | 0 |
| NPY_NPY1R | 0 | | 0 | 0 | 0 |
| PPY_NPY1R | 0 | | 0 | 0 | 0 |
| PYY_NPY1R | 0 | | 0 | 0 | 0 |
| NPY_NPY5R | 0 | | 0 | 0 | 0 |
| PPY_NPY5R | 0 | | 0 | 0 | 0 |
| PYY_NPY5R | 0 | | 0 | 0 | 0 |
| Progesterone_byHSD3B1_CatSperChannel1b | 0 | | 0 | 0 | 0 |
| Progesterone_byHSD3B1_CatSperChannel1dg | 0 | | 0 | 0 | 0 |
| Progesterone_byHSD3B1_CatSperChannel2b | 0 | | 0 | 0.008 | 0.007 |
| Progesterone_byHSD3B1_CatSperChannel2dg | 0 | | 0 | 0.006 | 0.002 |
| Progesterone_byHSD3B1_CatSperChannel3b | 0 | | 0 | 0 | 0 |
| Progesterone_byHSD3B1_CatSperChannel3dg | 0 | | 0 | 0 | 0 |
| Progesterone_byHSD3B1_CatSperChannel4b | 0 | | 0 | 0 | 0 |
| Progesterone_byHSD3B1_CatSperChannel4dg | 0 | | 0 | 0 | 0 |
| GNRH1_GNRHR | 0 | | 0 | 0 | 0 |
| GNRH2_GNRHR | 0 | | 0.002 | 0 | 0 |
| NSMF_GNRHR | 0.084 | | 0.055 | 0 | 0 |
| PROK1_PROKR1 | 0 | | 0 | 0 | 0 |
| PROK2_PROKR1 | 0.025 | | 0.002 | 0 | 0 |
| PRL_PRLR | 0 | | 0 | 0 | 0 |
| RLN1_RXFP1 | 0.032 | | 0.053 | 0 | 0 |
| RLN2_RXFP1 | 0.04 | | 0.063 | 0 | 0 |
| RLN3_RXFP1 | 0 | | 0 | 0 | 0 |
| PSAP_GPR37 | 0.329 | | 0.053 | 1.075 | 0 |
| PSAP_GPR37L1 | 0.303 | | 0.027 | 0 | 0 |
| ProstaglandinF2a_byAKR1B1_PTGFR | 0.293 | | 0.293 | 0 | 0 |
| ProstaglandinD2_byAKR1C3_PTGFR | 0.07 | | 0.07 | 0 | 0 |
| ProstaglandinF2a_byCBR1_PTGFR | 0.144 | | 0.073 | 0 | 0 |
| ProstaglandinF2a_byPRXL2B_PTGFR | 0.106 | | 0.117 | 0 | 0 |
| ProstaglandinD2_byAKR1C3_PTGDR | 0.002 | | 0.002 | 4.394 | 4.236 |
| PGD2_byPTGDS_PTGDR | 0.005 | | 0 | 2.727 | 2.57 |
| ProstaglandinD2_byAKR1C3_PTGDR2 | 0.002 | | 0.002 | 4.145 | 0 |
| PGD2_byPTGDS_PTGDR2 | 0.005 | | 0 | 2.478 | 0 |
| ProstaglandinE2_byPTGES_PTGER1 | 0 | | 0 | 0 | 0.001 |
| ProstaglandinE2_byPTGES2_PTGER1 | 0.179 | | 0.196 | 0 | 0.332 |
| ProstaglandinE2_byPTGES3_PTGER1 | 1.766 | | 2.348 | 0 | 1.84 |
| ProstaglandinE2_byPTGES_PTGER2 | 0 | | 0 | 0.615 | 0.509 |
| ProstaglandinE2_byPTGES2_PTGER2 | 0.175 | | 0.192 | 0.945 | 0.84 |
| ProstaglandinE2_byPTGES3_PTGER2 | 1.761 | | 2.343 | 2.454 | 2.348 |
| ProstaglandinE2_byPTGES_PTGER3 | 0 | | 0 | 0 | 0 |
| ProstaglandinE2_byPTGES2_PTGER3 | 0.174 | | 0.191 | 0 | 0 |
| ProstaglandinE2_byPTGES3_PTGER3 | 1.761 | | 2.343 | 0 | 0 |
| ProstaglandinE2_byPTGES_PTGER4 | 0 | | 0 | 1.103 | 1.118 |
| ProstaglandinE2_byPTGES2_PTGER4 | 0.176 | | 0.194 | 1.433 | 1.449 |
| ProstaglandinE2_byPTGES3_PTGER4 | 1.763 | | 2.345 | 2.942 | 2.957 |
| WNT1_FZD8_LRP6 | 0.114 | | 0.341 | 0 | 0 |
| WNT10A_FZD8_LRP6 | 0.033 | | 0.046 | 0 | 0 |
| WNT11_FZD8_LRP6 | 0.01 | | 0.049 | 0 | 0 |
| WNT16_FZD8_LRP6 | 0 | | 0 | 0 | 0 |
| WNT2_FZD8_LRP6 | 0 | | 0 | 0 | 0 |
| WNT2B_FZD8_LRP6 | 0.002 | | 0 | 0 | 0 |
| WNT3_FZD8_LRP6 | 0 | | 0.003 | 0 | 0 |
| WNT3A_FZD8_LRP6 | 0 | | 0.001 | 0 | 0 |
| WNT4_FZD8_LRP6 | 0.001 | | 0 | 0 | 0 |
| WNT5A_FZD8_LRP6 | 0 | | 0 | 0 | 0 |
| WNT5B_FZD8_LRP6 | 0.001 | | 0 | 0 | 0 |
| WNT6_FZD8_LRP6 | 0 | | 0.001 | 0 | 0 |
| WNT7A_FZD8_LRP6 | 0 | | 0.002 | 0 | 0 |
| WNT7B_FZD8_LRP6 | 0 | | 0 | 0 | 0 |
| WNT8A_FZD8_LRP6 | 0 | | 0 | 0 | 0 |
| WNT8B_FZD8_LRP6 | 0 | | 0 | 0 | 0 |
| WNT9A_FZD8_LRP6 | 0.001 | | 0 | 0 | 0 |
| WNT9B_FZD8_LRP6 | 0 | | 0 | 0 | 0 |
| DKK1_Kremen1_LRP6 | 0.019 | | 0 | 0 | 0 |
| RSPO2_LGR4 | 0.176 | | 0 | 0 | 0 |
| RSPO3_LGR4 | 0 | | 0 | 0 | 0 |
| RSPO4_LGR4 | 0 | | 0 | 0 | 0 |
| RSPO2_LGR5 | 0.016 | | 0 | 0 | 0 |
| RSPO3_LGR5 | 0 | | 0 | 0 | 0 |
| RSPO4_LGR5 | 0 | | 0 | 0 | 0 |
| RSPO2_LGR6 | 0.025 | | 0 | 0.015 | 0.003 |
| RSPO3_LGR6 | 0 | | 0 | 0.015 | 0.003 |
| RSPO4_LGR6 | 0 | | 0 | 0.016 | 0.004 |
| RELN_LRP8 | 0.008 | | 0 | 0.081 | 0.079 |
| RELN_VLDLR | 0.009 | | 0 | 0.06 | 0.063 |
| atRetinoicAcid_byALDH1A1_RAreceptor_RARA | 0.035 | | 0 | 2.848 | 2.837 |
| atRetinoicAcid_byALDH1A2_RAreceptor_RARA | 0 | | 0 | 0.19 | 0.179 |
| atRetinoicAcid_byALDH1A3_RAreceptor_RARA | 0.035 | | 0 | 0.015 | 0.004 |
| atRetinoicAcid_byALDH1A1_RAreceptor_RARA_RXRA | 0.035 | | 0 | 2.848 | 2.837 |
| atRetinoicAcid_byALDH1A2_RAreceptor_RARA_RXRA | 0 | | 0 | 0.19 | 0.179 |
| atRetinoicAcid_byALDH1A3_RAreceptor_RARA_RXRA | 0.035 | | 0 | 0.015 | 0.004 |
| atRetinoicAcid_byALDH1A1_RAreceptor_RARB | 0.022 | | 0 | 0 | 0 |
| atRetinoicAcid_byALDH1A2_RAreceptor_RARB | 0 | | 0 | 0 | 0 |
| atRetinoicAcid_byALDH1A3_RAreceptor_RARB | 0.021 | | 0 | 0 | 0 |
| atRetinoicAcid_byALDH1A1_RAreceptor_RARB_RXRB | 0.022 | | 0 | 0 | 0 |
| atRetinoicAcid_byALDH1A2_RAreceptor_RARB_RXRB | 0 | | 0 | 0 | 0 |
| atRetinoicAcid_byALDH1A3_RAreceptor_RARB_RXRB | 0.021 | | 0 | 0 | 0 |
| atRetinoicAcid_byALDH1A1_RAreceptor_RARG | 0.015 | | 0 | 2.848 | 2.837 |
| atRetinoicAcid_byALDH1A2_RAreceptor_RARG | 0 | | 0 | 0.19 | 0.179 |
| atRetinoicAcid_byALDH1A3_RAreceptor_RARG | 0.014 | | 0 | 0.015 | 0.004 |
| atRetinoicAcid_byALDH1A1_RAreceptor_RARG_RXRG | 0.002 | | 0 | 0 | 0 |
| atRetinoicAcid_byALDH1A2_RAreceptor_RARG_RXRG | 0 | | 0 | 0 | 0 |
| atRetinoicAcid_byALDH1A3_RAreceptor_RARG_RXRG | 0.002 | | 0 | 0 | 0 |
| atRetinoicAcid_byALDH1A1_RAreceptor_RXRA | 0.035 | | 0 | 2.848 | 2.837 |
| atRetinoicAcid_byALDH1A2_RAreceptor_RXRA | 0 | | 0 | 0.19 | 0.179 |
| atRetinoicAcid_byALDH1A3_RAreceptor_RXRA | 0.035 | | 0 | 0.015 | 0.004 |
| atRetinoicAcid_byALDH1A1_RAreceptor_RXRB | 0.035 | | 0 | 2.848 | 2.837 |
| atRetinoicAcid_byALDH1A2_RAreceptor_RXRB | 0 | | 0 | 0.19 | 0.179 |
| atRetinoicAcid_byALDH1A3_RAreceptor_RXRB | 0.035 | | 0 | 0.015 | 0.004 |
| atRetinoicAcid_byALDH1A1_RAreceptor_RXRG | 0.002 | | 0 | 0 | 0 |
| atRetinoicAcid_byALDH1A2_RAreceptor_RXRG | 0 | | 0 | 0 | 0 |
| atRetinoicAcid_byALDH1A3_RAreceptor_RXRG | 0.002 | | 0 | 0 | 0 |
| atRetinoicAcid_byALDH1A1_RORB | 0.002 | | 0 | 2.843 | 2.859 |
| atRetinoicAcid_byALDH1A2_RORB | 0 | | 0 | 0.185 | 0.201 |
| atRetinoicAcid_byALDH1A3_RORB | 0.002 | | 0 | 0.01 | 0.025 |
| RARRES2_CMKLR1 | 0.002 | | 0 | 9.373 | 0 |
| RARRES2_GPR1 | 0.003 | | 0 | 9.367 | 0 |
| TAFA1_GPR1 | 0.045 | | 0.044 | 0.004 | 0 |
| SOSTDC1_LRP5 | 0 | | 0 | 0 | 0 |
| DKK1_LRP5 | 0.252 | | 0 | 0 | 0 |
| SOSTDC1_LRP6 | 0 | | 0 | 0 | 0 |
| DKK1_LRP6 | 0.127 | | 0 | 0 | 0 |
| DKK2_LRP6 | 0.127 | | 0.135 | 0 | 0 |
| SCT_SCTR | 0 | | 0 | 0 | 0 |
| VIP_SCTR | 0 | | 0 | 0 | 0 |
| SELE_GLG1 | 0 | | 0.426 | 0.268 | 0.251 |
| SEMA3A_PlexinA1_complex3 | 0 | | 0 | 0 | 0 |
| SEMA3A_PlexinA2_complex1 | 0 | | 0 | 0 | 0 |
| SEMA6A_PlexinA2_complex1 | 0 | | 0 | 0 | 0 |
| SEMA3A_PlexinA3_complex1 | 0 | | 0 | 0 | 0 |
| SEMA3A_PlexinA4_complex1 | 0 | | 0 | 0 | 0 |
| SEMA3E_PLXND1 | 0 | | 0.033 | 0.278 | 0.247 |
| SEMA4A_PLXND1 | 0.07 | | 0.039 | 0.135 | 0.104 |
| SEMA4C_PLXNB2 | 0.308 | | 0.332 | 0 | 0 |
| SEMA4D_PLXNB2 | 0.741 | | 0.683 | 0 | 0 |
| SEMA4G_PLXNB2 | 0 | | 0 | 0 | 0 |
| SEMA4D_CD72 | 0.487 | | 0.429 | 0.029 | 0.022 |
| SEMA4D_PLXNB1 | 0.618 | | 0.559 | 0 | 0 |
| SEMA4D_PTPRC | 0.486 | | 0.428 | 4.587 | 4.719 |
| SEMA4D_PLXNB3 | 0.493 | | 0.435 | 0 | 0 |
| SEMA5A_PLXNB3 | 0 | | 0 | 0 | 0 |
| SEMA6D_PlexinA1_complex1 | 0 | | 0 | 0 | 0 |
| SEMA6D_PlexinA1_complex2 | 0 | | 0 | 0 | 0 |
| SEMA7A_PLXNC1 | 0.061 | | 0.088 | 0.134 | 0.12 |
| 5-HT_byTPH1_and_SLC18A2_HTR1D | 0 | | 0 | 0 | 0 |
| 5-HT_byTPH2_and_SLC18A2_HTR1D | 0 | | 0 | 0 | 0 |
| 5-HT_byTPH1_and_SLC6A4_HTR1D | 0 | | 0 | 0 | 0 |
| 5-HT_byTPH2_and_SLC6A4_HTR1D | 0 | | 0 | 0 | 0 |
| SerotoninDopamin_byDDC_HTR1D | 0 | | 0 | 0 | 0 |
| 5-HT_byTPH1_and_SLC18A2_HTR1E | 0 | | 0 | 0 | 0 |
| 5-HT_byTPH2_and_SLC18A2_HTR1E | 0 | | 0 | 0 | 0 |
| 5-HT_byTPH1_and_SLC6A4_HTR1E | 0 | | 0 | 0 | 0 |
| 5-HT_byTPH2_and_SLC6A4_HTR1E | 0 | | 0 | 0 | 0 |
| SerotoninDopamin_byDDC_HTR1E | 0 | | 0 | 0 | 0 |
| 5-HT_byTPH1_and_SLC18A2_HTR2A | 0 | | 0 | 0 | 0 |
| 5-HT_byTPH2_and_SLC18A2_HTR2A | 0 | | 0 | 0 | 0 |
| 5-HT_byTPH1_and_SLC6A4_HTR2A | 0 | | 0 | 0 | 0 |
| 5-HT_byTPH2_and_SLC6A4_HTR2A | 0 | | 0 | 0 | 0 |
| SerotoninDopamin_byDDC_HTR2A | 0 | | 0 | 0 | 0 |
| 5-HT_byTPH1_and_SLC18A2_HTR2B | 0 | | 0 | 0.006 | 0 |
| 5-HT_byTPH2_and_SLC18A2_HTR2B | 0 | | 0 | 0.006 | 0 |
| 5-HT_byTPH1_and_SLC6A4_HTR2B | 0 | | 0 | 0.006 | 0 |
| 5-HT_byTPH2_and_SLC6A4_HTR2B | 0 | | 0 | 0.006 | 0 |
| SerotoninDopamin_byDDC_HTR2B | 0 | | 0 | 0.061 | 0 |
| 5-HT_byTPH1_and_SLC18A2_HTR2C | 0 | | 0 | 0 | 0 |
| 5-HT_byTPH2_and_SLC18A2_HTR2C | 0 | | 0 | 0 | 0 |
| 5-HT_byTPH1_and_SLC6A4_HTR2C | 0 | | 0 | 0 | 0 |
| 5-HT_byTPH2_and_SLC6A4_HTR2C | 0 | | 0 | 0 | 0 |
| SerotoninDopamin_byDDC_HTR2C | 0 | | 0 | 0 | 0 |
| 5-HT_byTPH1_and_SLC18A2_HTR4 | 0 | | 0 | 0 | 0 |
| 5-HT_byTPH2_and_SLC18A2_HTR4 | 0 | | 0 | 0 | 0 |
| 5-HT_byTPH1_and_SLC6A4_HTR4 | 0 | | 0 | 0 | 0 |
| 5-HT_byTPH2_and_SLC6A4_HTR4 | 0 | | 0 | 0 | 0 |
| SerotoninDopamin_byDDC_HTR4 | 0 | | 0 | 0 | 0 |
| 5-HT_byTPH1_and_SLC18A2_HTR5A | 0 | | 0 | 0 | 0 |
| 5-HT_byTPH2_and_SLC18A2_HTR5A | 0 | | 0 | 0 | 0 |
| 5-HT_byTPH1_and_SLC6A4_HTR5A | 0 | | 0 | 0 | 0 |
| 5-HT_byTPH2_and_SLC6A4_HTR5A | 0 | | 0 | 0 | 0 |
| SerotoninDopamin_byDDC_HTR5A | 0 | | 0 | 0 | 0 |
| 5-HT_byTPH1_and_SLC18A2_HTR6 | 0 | | 0 | 0.002 | 0 |
| 5-HT_byTPH2_and_SLC18A2_HTR6 | 0 | | 0 | 0.002 | 0 |
| 5-HT_byTPH1_and_SLC6A4_HTR6 | 0 | | 0 | 0.002 | 0 |
| 5-HT_byTPH2_and_SLC6A4_HTR6 | 0 | | 0 | 0.002 | 0 |
| SerotoninDopamin_byDDC_HTR6 | 0 | | 0 | 0.058 | 0 |
| 5-HT_byTPH1_and_SLC18A2_HTR7 | 0 | | 0 | 0 | 0 |
| 5-HT_byTPH2_and_SLC18A2_HTR7 | 0 | | 0 | 0 | 0 |
| 5-HT_byTPH1_and_SLC6A4_HTR7 | 0 | | 0 | 0 | 0 |
| 5-HT_byTPH2_and_SLC6A4_HTR7 | 0 | | 0 | 0 | 0 |
| SerotoninDopamin_byDDC_HTR7 | 0 | | 0 | 0 | 0 |
| SerotoninDopamin_byDDC_DRD1 | 0 | | 0 | 0 | 0 |
| Dopamine_byDDC_and_SLC18A2_DRD1 | 0 | | 0 | 0 | 0 |
| Dopamine_byDDC_and_SLC6A3_DRD1 | 0 | | 0 | 0 | 0 |
| SerotoninDopamin_byDDC_DRD3 | 0 | | 0 | 0 | 0 |
| Dopamine_byDDC_and_SLC18A2_DRD3 | 0 | | 0 | 0 | 0 |
| Dopamine_byDDC_and_SLC6A3_DRD3 | 0 | | 0 | 0 | 0 |
| SerotoninDopamin_byDDC_DRD4 | 0 | | 0 | 0 | 0 |
| Dopamine_byDDC_and_SLC18A2_DRD4 | 0 | | 0 | 0 | 0 |
| Dopamine_byDDC_and_SLC6A3_DRD4 | 0 | | 0 | 0 | 0 |
| SerotoninDopamin_byDDC_HTR3A | 0 | | 0 | 0.059 | 0 |
| SerotoninDopamin_byDDC_HTR3B | 0 | | 0 | 0 | 0 |
| SerotoninDopamin_byDDC_HTR3E | 0 | | 0 | 0 | 0 |
| b-PEA_byDDC_TAAR1 | 0 | | 0 | 0 | 0 |
| SLIT1_ROBO1 | 0 | | 0 | 0 | 0 |
| SLIT2_ROBO1 | 0 | | 0 | 0 | 0 |
| SLIT2_ROBO2 | 0 | | 0 | 0.045 | 0 |
| CORT_SSTR1 | 0 | | 0 | 0 | 0 |
| CORT_SSTR2 | 0 | | 0 | 0 | 0 |
| CORT_SSTR3 | 0 | | 0 | 0.003 | 0 |
| CORT_SSTR5 | 0 | | 0 | 0 | 0 |
| GH2_GHR | 0 | | 0 | 0 | 0 |
| SHH_PTCH2_BOC_transmembrane_receptor | 0 | | 0 | 0 | 0 |
| SHH_PTCH2_CDON_transmembrane_receptor | 0 | | 0 | 0.032 | 0.032 |
| SHH_PTCH2_GAS1_transmembrane_receptor | 0 | | 0 | 0.035 | 0.033 |
| SDC1_ADGRA2 | 0 | | 0 | 0 | 0 |
| SDC2_ADGRA2 | 0.014 | | 0 | 0 | 0 |
| integrin_aVb3_complex_ADGRA2 | 0 | | 0 | 0 | 0 |
| TAC3_TACR1 | 0 | | 0 | 0 | 0 |
| TAC3_TACR2 | 0 | | 0 | 0 | 0 |
| TAC3_TACR3 | 0 | | 0 | 0 | 0 |
| TAFA5_S1PR2 | 0 | | 0 | 0.013 | 0.048 |
| TAX1BP3_ADGRB1 | 0.067 | | 0.048 | 0.102 | 0.097 |
| integrin_aVb5_complex_ADGRB1 | 0.002 | | 0 | 0.282 | 0.277 |
| RTN4R_ADGRB1 | 0.072 | | 0.062 | 0.035 | 0.03 |
| TAX1BP3_ADGRB2 | 0.067 | | 0.049 | 0.099 | 0.101 |
| ThromboxaneA2_byTBXAS1_TBXA2R | 0.114 | | 0.021 | 0 | 0 |
| THY1_ADGRE2 | 0 | | 0 | 0.001 | 0 |
| integrin_aVb1_complex_ADGRE2 | 0 | | 0 | 0.278 | 0 |
| integrin_aVb3_complex_ADGRE2 | 0 | | 0 | 0.005 | 0 |
| TF_TFR2 | 0.332 | | 0 | 6.171 | 0 |
| TF_TFRC | 0.107 | | 0 | 6.372 | 6.301 |
| HFE_TFRC | 0.104 | | 0 | 0.229 | 0.157 |
| TGFB1_TGFbeta_receptor2 | 3.55 | | 5.022 | 0.401 | 0.384 |
| TGFB2_TGFbeta_receptor2 | 0 | | 0 | 0.099 | 0.083 |
| TGFB3_TGFbeta_receptor2 | 0.106 | | 0 | 0.035 | 0.018 |
| TGFB1_TGFbeta_receptor1 | 3.487 | | 4.96 | 0.585 | 0.533 |
| TGFB2_TGFbeta_receptor1 | 0 | | 0 | 0.284 | 0.232 |
| TGFB3_TGFbeta_receptor1 | 0.044 | | 0 | 0.219 | 0.167 |
| TGFB1_TGFBR3 | 3.487 | | 4.96 | 0.592 | 0.526 |
| TGFB2_TGFBR3 | 0 | | 0 | 0.291 | 0.225 |
| TGFB3_TGFBR3 | 0.044 | | 0 | 0.227 | 0.16 |
| FGFR4_TGFBR3 | 0.04 | | 0.038 | 0.505 | 0.438 |
| TGFB3_integrin_aVb8_complex | 0.012 | | 0 | 0 | 0 |
| Triiodothyronine_byDIO3_THRA | 0 | | 0 | 0.109 | 0.121 |
| Triiodothyronine_byDIO3_THRB | 0 | | 0 | 0.002 | 0 |
| Lthyroxine_byTPO_THRB | 0.199 | | 0 | 0 | 0 |
| BTLA_TNFRSF14 | 0.307 | | 0.277 | 0 | 0 |
| CD160_TNFRSF14 | 0.687 | | 0.473 | 0.676 | 0.763 |
| LTA_TNFRSF14 | 0.601 | | 0.528 | 0.675 | 0.762 |
| TNFSF14_TNFRSF14 | 0.841 | | 1.057 | 0.685 | 0.772 |
| FASLG_FAS | 0.293 | | 0.396 | 0.232 | 0.254 |
| FASLG_TNFRSF6B | 0.272 | | 0.376 | 0 | 0 |
| TNFSF14_TNFRSF6B | 0.585 | | 0.8 | 0 | 0 |
| TNFSF15_TNFRSF6B | 0.005 | | 0 | 0 | 0 |
| LTA_TNFRSF1A | 0.625 | | 0.552 | 0.299 | 0.153 |
| TNF_TNFRSF1A | 5.75 | | 2.315 | 0.301 | 0.155 |
| LTA_TNFRSF1B | 0.344 | | 0.271 | 0.405 | 0.518 |
| TNF_TNFRSF1B | 5.469 | | 2.035 | 0.407 | 0.52 |
| TNFSF10_TNFRSF10A | 0.213 | | 0.071 | 0.526 | 0.484 |
| TNFSF10_TNFRSF10B | 0.235 | | 0.093 | 0.438 | 0.439 |
| TNFSF10_TNFRSF10C | 0.203 | | 0.062 | 0.391 | 0 |
| TNFSF10_TNFRSF10D | 0.215 | | 0.074 | 0.409 | 0.391 |
| TNFSF10_TNFRSF11B | 0.64 | | 0.499 | 0.393 | 0 |
| TNFSF11_TNFRSF11B | 0 | | 0 | 0.003 | 0 |
| TNFSF11_TNFRSF11A | 0 | | 0 | 0.003 | 0.007 |
| TNFSF12_TNFRSF12A | 2.546 | | 2.268 | 0.129 | 0.065 |
| TNFSF12_TNFRSF25 | 0.885 | | 0.607 | 0.739 | 0.872 |
| TNFSF15_TNFRSF25 | 0.069 | | 0 | 0.705 | 0.838 |
| TNFSF13_TNFRSF13B | 0.002 | | 0.001 | 0 | 0 |
| TNFSF13B_TNFRSF13B | 0.055 | | 0.253 | 0 | 0 |
| TNFSF13_TNFRSF17 | 0.002 | | 0.001 | 0 | 0 |
| TNFSF13B_TNFRSF17 | 0.055 | | 0.253 | 0 | 0 |
| TNFSF13B_TNFRSF13C | 0.055 | | 0.253 | 0.014 | 0.018 |
| TNFSF18_TNFRSF18 | 0 | | 0 | 0.151 | 0.203 |
| TNFSF4_TNFRSF4 | 0.021 | | 0.001 | 0.125 | 0.162 |
| TNFSF8_TNFRSF8 | 0.252 | | 0.12 | 0.002 | 0 |
| TNFSF9_TNFRSF9 | 0.944 | | 1.013 | 0.01 | 0.036 |
| VEGFA_KDR | 0.001 | | 0 | 0 | 0 |
| VEGFC_KDR | 0 | | 0 | 0 | 0 |
| VEGFD_KDR | 0 | | 0 | 0 | 0 |
| VEGFC_FLT4 | 0 | | 0 | 0.069 | 0.045 |
| VEGFD_FLT4 | 0 | | 0 | 0.058 | 0.033 |
| DKK1_Kremen2_LRP6 | 0.002 | | 0 | 0 | 0 |
| DKK2_Kremen2_LRP6 | 0.002 | | 0.01 | 0 | 0 |
| WNT1_FRZB | 0.306 | | 0.533 | 0 | 0 |
| WNT10A_FRZB | 0.224 | | 0.238 | 0 | 0 |
| WNT11_FRZB | 0.201 | | 0.241 | 0 | 0 |
| WNT16_FRZB | 0 | | 0 | 0 | 0 |
| WNT2_FRZB | 0 | | 0 | 0 | 0 |
| WNT2B_FRZB | 0.194 | | 0 | 0 | 0 |
| WNT3_FRZB | 0 | | 0.195 | 0 | 0 |
| WNT3A_FRZB | 0 | | 0.192 | 0 | 0 |
| WNT4_FRZB | 0.192 | | 0 | 0 | 0 |
| WNT5A_FRZB | 0 | | 0 | 0 | 0 |
| WNT5B_FRZB | 0.192 | | 0 | 0 | 0 |
| WNT6_FRZB | 0 | | 0.192 | 0 | 0 |
| WNT7A_FRZB | 0 | | 0.194 | 0 | 0 |
| WNT7B_FRZB | 0 | | 0 | 0 | 0 |
| WNT8A_FRZB | 0 | | 0 | 0 | 0 |
| WNT8B_FRZB | 0 | | 0 | 0 | 0 |
| WNT9A_FRZB | 0.193 | | 0 | 0 | 0 |
| WNT9B_FRZB | 0 | | 0 | 0 | 0 |
| WNT1_FZD1_LRP5 | 0.147 | | 0.374 | 0 | 0 |
| WNT10A_FZD1_LRP5 | 0.066 | | 0.079 | 0 | 0 |
| WNT11_FZD1_LRP5 | 0.043 | | 0.083 | 0 | 0 |
| WNT16_FZD1_LRP5 | 0 | | 0 | 0 | 0 |
| WNT2_FZD1_LRP5 | 0 | | 0 | 0 | 0 |
| WNT2B_FZD1_LRP5 | 0.035 | | 0 | 0 | 0 |
| WNT3_FZD1_LRP5 | 0 | | 0.036 | 0 | 0 |
| WNT3A_FZD1_LRP5 | 0 | | 0.034 | 0 | 0 |
| WNT4_FZD1_LRP5 | 0.034 | | 0 | 0 | 0 |
| WNT5B_FZD1_LRP5 | 0.034 | | 0 | 0 | 0 |
| WNT6_FZD1_LRP5 | 0 | | 0.034 | 0 | 0 |
| WNT7A_FZD1_LRP5 | 0 | | 0.035 | 0 | 0 |
| WNT7B_FZD1_LRP5 | 0 | | 0 | 0 | 0 |
| WNT8A_FZD1_LRP5 | 0 | | 0 | 0 | 0 |
| WNT8B_FZD1_LRP5 | 0 | | 0 | 0 | 0 |
| WNT9A_FZD1_LRP5 | 0.035 | | 0 | 0 | 0 |
| WNT9B_FZD1_LRP5 | 0 | | 0 | 0 | 0 |
| WNT1_FZD1_LRP6 | 0.147 | | 0.374 | 0 | 0 |
| WNT10A_FZD1_LRP6 | 0.066 | | 0.079 | 0 | 0 |
| WNT11_FZD1_LRP6 | 0.043 | | 0.083 | 0 | 0 |
| WNT16_FZD1_LRP6 | 0 | | 0 | 0 | 0 |
| WNT2_FZD1_LRP6 | 0 | | 0 | 0 | 0 |
| WNT2B_FZD1_LRP6 | 0.035 | | 0 | 0 | 0 |
| WNT3_FZD1_LRP6 | 0 | | 0.036 | 0 | 0 |
| WNT3A_FZD1_LRP6 | 0 | | 0.034 | 0 | 0 |
| WNT4_FZD1_LRP6 | 0.034 | | 0 | 0 | 0 |
| WNT5B_FZD1_LRP6 | 0.034 | | 0 | 0 | 0 |
| WNT6_FZD1_LRP6 | 0 | | 0.034 | 0 | 0 |
| WNT7A_FZD1_LRP6 | 0 | | 0.035 | 0 | 0 |
| WNT7B_FZD1_LRP6 | 0 | | 0 | 0 | 0 |
| WNT8A_FZD1_LRP6 | 0 | | 0 | 0 | 0 |
| WNT8B_FZD1_LRP6 | 0 | | 0 | 0 | 0 |
| WNT9A_FZD1_LRP6 | 0.035 | | 0 | 0 | 0 |
| WNT9B_FZD1_LRP6 | 0 | | 0 | 0 | 0 |
| WNT1_FZD10_LRP5 | 0.114 | | 0.341 | 0 | 0 |
| WNT11_FZD10_LRP5 | 0.01 | | 0.049 | 0 | 0 |
| WNT16_FZD10_LRP5 | 0 | | 0 | 0 | 0 |
| WNT2_FZD10_LRP5 | 0 | | 0 | 0 | 0 |
| WNT2B_FZD10_LRP5 | 0.002 | | 0 | 0 | 0 |
| WNT3_FZD10_LRP5 | 0 | | 0.003 | 0 | 0 |
| WNT3A_FZD10_LRP5 | 0 | | 0.001 | 0 | 0 |
| WNT4_FZD10_LRP5 | 0.001 | | 0 | 0 | 0 |
| WNT5A_FZD10_LRP5 | 0 | | 0 | 0 | 0 |
| WNT5B_FZD10_LRP5 | 0.001 | | 0 | 0 | 0 |
| WNT6_FZD10_LRP5 | 0 | | 0.001 | 0 | 0 |
| WNT7A_FZD10_LRP5 | 0 | | 0.002 | 0 | 0 |
| WNT7B_FZD10_LRP5 | 0 | | 0 | 0 | 0 |
| WNT8A_FZD10_LRP5 | 0 | | 0 | 0 | 0 |
| WNT8B_FZD10_LRP5 | 0 | | 0 | 0 | 0 |
| WNT9A_FZD10_LRP5 | 0.001 | | 0 | 0 | 0 |
| WNT9B_FZD10_LRP5 | 0 | | 0 | 0 | 0 |
| WNT1_FZD10_LRP6 | 0.114 | | 0.341 | 0 | 0 |
| WNT11_FZD10_LRP6 | 0.01 | | 0.049 | 0 | 0 |
| WNT16_FZD10_LRP6 | 0 | | 0 | 0 | 0 |
| WNT2_FZD10_LRP6 | 0 | | 0 | 0 | 0 |
| WNT2B_FZD10_LRP6 | 0.002 | | 0 | 0 | 0 |
| WNT3_FZD10_LRP6 | 0 | | 0.003 | 0 | 0 |
| WNT3A_FZD10_LRP6 | 0 | | 0.001 | 0 | 0 |
| WNT4_FZD10_LRP6 | 0.001 | | 0 | 0 | 0 |
| WNT5A_FZD10_LRP6 | 0 | | 0 | 0 | 0 |
| WNT5B_FZD10_LRP6 | 0.001 | | 0 | 0 | 0 |
| WNT6_FZD10_LRP6 | 0 | | 0.001 | 0 | 0 |
| WNT7A_FZD10_LRP6 | 0 | | 0.002 | 0 | 0 |
| WNT7B_FZD10_LRP6 | 0 | | 0 | 0 | 0 |
| WNT8A_FZD10_LRP6 | 0 | | 0 | 0 | 0 |
| WNT8B_FZD10_LRP6 | 0 | | 0 | 0 | 0 |
| WNT9A_FZD10_LRP6 | 0.001 | | 0 | 0 | 0 |
| WNT9B_FZD10_LRP6 | 0 | | 0 | 0 | 0 |
| WNT1_FZD2_LRP5 | 0.114 | | 0.341 | 0 | 0 |
| WNT11_FZD2_LRP5 | 0.01 | | 0.05 | 0 | 0 |
| WNT16_FZD2_LRP5 | 0 | | 0 | 0 | 0 |
| WNT2_FZD2_LRP5 | 0 | | 0 | 0 | 0 |
| WNT2B_FZD2_LRP5 | 0.002 | | 0 | 0 | 0 |
| WNT3_FZD2_LRP5 | 0 | | 0.003 | 0 | 0 |
| WNT3A_FZD2_LRP5 | 0 | | 0.001 | 0 | 0 |
| WNT4_FZD2_LRP5 | 0.001 | | 0 | 0 | 0 |
| WNT5A_FZD2_LRP5 | 0 | | 0 | 0 | 0 |
| WNT5B_FZD2_LRP5 | 0.001 | | 0 | 0 | 0 |
| WNT6_FZD2_LRP5 | 0 | | 0.001 | 0 | 0 |
| WNT7A_FZD2_LRP5 | 0 | | 0.002 | 0 | 0 |
| WNT7B_FZD2_LRP5 | 0 | | 0 | 0 | 0 |
| WNT8A_FZD2_LRP5 | 0 | | 0 | 0 | 0 |
| WNT8B_FZD2_LRP5 | 0 | | 0 | 0 | 0 |
| WNT9A_FZD2_LRP5 | 0.002 | | 0 | 0 | 0 |
| WNT9B_FZD2_LRP5 | 0 | | 0 | 0 | 0 |
| WNT1_FZD2_LRP6 | 0.114 | | 0.341 | 0 | 0 |
| WNT11_FZD2_LRP6 | 0.01 | | 0.05 | 0 | 0 |
| WNT16_FZD2_LRP6 | 0 | | 0 | 0 | 0 |
| WNT2_FZD2_LRP6 | 0 | | 0 | 0 | 0 |
| WNT2B_FZD2_LRP6 | 0.002 | | 0 | 0 | 0 |
| WNT3_FZD2_LRP6 | 0 | | 0.003 | 0 | 0 |
| WNT3A_FZD2_LRP6 | 0 | | 0.001 | 0 | 0 |
| WNT4_FZD2_LRP6 | 0.001 | | 0 | 0 | 0 |
| WNT5A_FZD2_LRP6 | 0 | | 0 | 0 | 0 |
| WNT5B_FZD2_LRP6 | 0.001 | | 0 | 0 | 0 |
| WNT6_FZD2_LRP6 | 0 | | 0.001 | 0 | 0 |
| WNT7A_FZD2_LRP6 | 0 | | 0.002 | 0 | 0 |
| WNT7B_FZD2_LRP6 | 0 | | 0 | 0 | 0 |
| WNT8A_FZD2_LRP6 | 0 | | 0 | 0 | 0 |
| WNT8B_FZD2_LRP6 | 0 | | 0 | 0 | 0 |
| WNT9A_FZD2_LRP6 | 0.002 | | 0 | 0 | 0 |
| WNT9B_FZD2_LRP6 | 0 | | 0 | 0 | 0 |
| WNT1_FZD3_LRP5 | 0.118 | | 0.345 | 0 | 0 |
| WNT11_FZD3_LRP5 | 0.013 | | 0.053 | 0 | 0 |
| WNT16_FZD3_LRP5 | 0 | | 0 | 0 | 0 |
| WNT2_FZD3_LRP5 | 0 | | 0 | 0 | 0 |
| WNT2B_FZD3_LRP5 | 0.006 | | 0 | 0 | 0 |
| WNT3_FZD3_LRP5 | 0 | | 0.007 | 0 | 0 |
| WNT3A_FZD3_LRP5 | 0 | | 0.005 | 0 | 0 |
| WNT4_FZD3_LRP5 | 0.005 | | 0 | 0 | 0 |
| WNT5A_FZD3_LRP5 | 0 | | 0 | 0 | 0 |
| WNT5B_FZD3_LRP5 | 0.004 | | 0 | 0 | 0 |
| WNT6_FZD3_LRP5 | 0 | | 0.005 | 0 | 0 |
| WNT7A_FZD3_LRP5 | 0 | | 0.006 | 0 | 0 |
| WNT7B_FZD3_LRP5 | 0 | | 0 | 0 | 0 |
| WNT8A_FZD3_LRP5 | 0 | | 0 | 0 | 0 |
| WNT8B_FZD3_LRP5 | 0 | | 0 | 0 | 0 |
| WNT9A_FZD3_LRP5 | 0.005 | | 0 | 0 | 0 |
| WNT9B_FZD3_LRP5 | 0 | | 0 | 0 | 0 |
| WNT1_FZD3_LRP6 | 0.118 | | 0.345 | 0 | 0 |
| WNT11_FZD3_LRP6 | 0.013 | | 0.053 | 0 | 0 |
| WNT16_FZD3_LRP6 | 0 | | 0 | 0 | 0 |
| WNT2_FZD3_LRP6 | 0 | | 0 | 0 | 0 |
| WNT2B_FZD3_LRP6 | 0.006 | | 0 | 0 | 0 |
| WNT3_FZD3_LRP6 | 0 | | 0.007 | 0 | 0 |
| WNT3A_FZD3_LRP6 | 0 | | 0.005 | 0 | 0 |
| WNT4_FZD3_LRP6 | 0.005 | | 0 | 0 | 0 |
| WNT5A_FZD3_LRP6 | 0 | | 0 | 0 | 0 |
| WNT5B_FZD3_LRP6 | 0.004 | | 0 | 0 | 0 |
| WNT6_FZD3_LRP6 | 0 | | 0.005 | 0 | 0 |
| WNT7A_FZD3_LRP6 | 0 | | 0.006 | 0 | 0 |
| WNT7B_FZD3_LRP6 | 0 | | 0 | 0 | 0 |
| WNT8A_FZD3_LRP6 | 0 | | 0 | 0 | 0 |
| WNT8B_FZD3_LRP6 | 0 | | 0 | 0 | 0 |
| WNT9A_FZD3_LRP6 | 0.005 | | 0 | 0 | 0 |
| WNT9B_FZD3_LRP6 | 0 | | 0 | 0 | 0 |
| WNT1_FZD4_LRP5 | 0.162 | | 0.39 | 0 | 0 |
| WNT11_FZD4_LRP5 | 0.058 | | 0.098 | 0 | 0 |
| WNT16_FZD4_LRP5 | 0 | | 0 | 0 | 0 |
| WNT2_FZD4_LRP5 | 0 | | 0 | 0 | 0 |
| WNT2B_FZD4_LRP5 | 0.05 | | 0 | 0 | 0 |
| WNT3_FZD4_LRP5 | 0 | | 0.051 | 0 | 0 |
| WNT3A_FZD4_LRP5 | 0 | | 0.049 | 0 | 0 |
| WNT4_FZD4_LRP5 | 0.049 | | 0 | 0 | 0 |
| WNT5A_FZD4_LRP5 | 0 | | 0 | 0 | 0 |
| WNT5B_FZD4_LRP5 | 0.049 | | 0 | 0 | 0 |
| WNT6_FZD4_LRP5 | 0 | | 0.049 | 0 | 0 |
| WNT7A_FZD4_LRP5 | 0 | | 0.05 | 0 | 0 |
| WNT7B_FZD4_LRP5 | 0 | | 0 | 0 | 0 |
| WNT8A_FZD4_LRP5 | 0 | | 0 | 0 | 0 |
| WNT8B_FZD4_LRP5 | 0 | | 0 | 0 | 0 |
| WNT9A_FZD4_LRP5 | 0.05 | | 0 | 0 | 0 |
| WNT9B_FZD4_LRP5 | 0 | | 0 | 0 | 0 |
| NDP_FZD4_LRP5 | 0 | | 0 | 0 | 0 |
| WNT1_FZD4_LRP6 | 0.162 | | 0.39 | 0 | 0 |
| WNT11_FZD4_LRP6 | 0.058 | | 0.098 | 0 | 0 |
| WNT16_FZD4_LRP6 | 0 | | 0 | 0 | 0 |
| WNT2_FZD4_LRP6 | 0 | | 0 | 0 | 0 |
| WNT2B_FZD4_LRP6 | 0.05 | | 0 | 0 | 0 |
| WNT3_FZD4_LRP6 | 0 | | 0.051 | 0 | 0 |
| WNT3A_FZD4_LRP6 | 0 | | 0.049 | 0 | 0 |
| WNT4_FZD4_LRP6 | 0.049 | | 0 | 0 | 0 |
| WNT5A_FZD4_LRP6 | 0 | | 0 | 0 | 0 |
| WNT5B_FZD4_LRP6 | 0.049 | | 0 | 0 | 0 |
| WNT6_FZD4_LRP6 | 0 | | 0.049 | 0 | 0 |
| WNT7A_FZD4_LRP6 | 0 | | 0.05 | 0 | 0 |
| WNT7B_FZD4_LRP6 | 0 | | 0 | 0 | 0 |
| WNT8A_FZD4_LRP6 | 0 | | 0 | 0 | 0 |
| WNT8B_FZD4_LRP6 | 0 | | 0 | 0 | 0 |
| WNT9A_FZD4_LRP6 | 0.05 | | 0 | 0 | 0 |
| WNT9B_FZD4_LRP6 | 0 | | 0 | 0 | 0 |
| WNT1_FZD5_LRP5 | 0.258 | | 0.485 | 0 | 0 |
| WNT10A_FZD5_LRP5 | 0.176 | | 0.19 | 0 | 0 |
| WNT11_FZD5_LRP5 | 0.153 | | 0.193 | 0 | 0 |
| WNT16_FZD5_LRP5 | 0 | | 0 | 0 | 0 |
| WNT2_FZD5_LRP5 | 0 | | 0 | 0 | 0 |
| WNT2B_FZD5_LRP5 | 0.146 | | 0 | 0 | 0 |
| WNT3_FZD5_LRP5 | 0 | | 0.147 | 0 | 0 |
| WNT3A_FZD5_LRP5 | 0 | | 0.145 | 0 | 0 |
| WNT4_FZD5_LRP5 | 0.145 | | 0 | 0 | 0 |
| WNT5A_FZD5_LRP5 | 0 | | 0 | 0 | 0 |
| WNT5B_FZD5_LRP5 | 0.144 | | 0 | 0 | 0 |
| WNT6_FZD5_LRP5 | 0 | | 0.144 | 0 | 0 |
| WNT7A_FZD5_LRP5 | 0 | | 0.146 | 0 | 0 |
| WNT7B_FZD5_LRP5 | 0 | | 0 | 0 | 0 |
| WNT8A_FZD5_LRP5 | 0 | | 0 | 0 | 0 |
| WNT8B_FZD5_LRP5 | 0 | | 0 | 0 | 0 |
| WNT9A_FZD5_LRP5 | 0.145 | | 0 | 0 | 0 |
| WNT9B_FZD5_LRP5 | 0 | | 0 | 0 | 0 |
| WNT1_FZD5_LRP6 | 0.24 | | 0.467 | 0 | 0 |
| WNT10A_FZD5_LRP6 | 0.158 | | 0.172 | 0 | 0 |
| WNT11_FZD5_LRP6 | 0.135 | | 0.175 | 0 | 0 |
| WNT16_FZD5_LRP6 | 0 | | 0 | 0 | 0 |
| WNT2_FZD5_LRP6 | 0 | | 0 | 0 | 0 |
| WNT2B_FZD5_LRP6 | 0.128 | | 0 | 0 | 0 |
| WNT3_FZD5_LRP6 | 0 | | 0.129 | 0 | 0 |
| WNT3A_FZD5_LRP6 | 0 | | 0.127 | 0 | 0 |
| WNT4_FZD5_LRP6 | 0.127 | | 0 | 0 | 0 |
| WNT5A_FZD5_LRP6 | 0 | | 0 | 0 | 0 |
| WNT5B_FZD5_LRP6 | 0.126 | | 0 | 0 | 0 |
| WNT6_FZD5_LRP6 | 0 | | 0.127 | 0 | 0 |
| WNT7A_FZD5_LRP6 | 0 | | 0.128 | 0 | 0 |
| WNT7B_FZD5_LRP6 | 0 | | 0 | 0 | 0 |
| WNT8A_FZD5_LRP6 | 0 | | 0 | 0 | 0 |
| WNT8B_FZD5_LRP6 | 0 | | 0 | 0 | 0 |
| WNT9A_FZD5_LRP6 | 0.127 | | 0 | 0 | 0 |
| WNT9B_FZD5_LRP6 | 0 | | 0 | 0 | 0 |
| WNT1_FZD6_LRP5 | 0.182 | | 0.409 | 0 | 0 |
| WNT11_FZD6_LRP5 | 0.078 | | 0.117 | 0 | 0 |
| WNT16_FZD6_LRP5 | 0 | | 0 | 0 | 0 |
| WNT2_FZD6_LRP5 | 0 | | 0 | 0 | 0 |
| WNT2B_FZD6_LRP5 | 0.07 | | 0 | 0 | 0 |
| WNT3_FZD6_LRP5 | 0 | | 0.071 | 0 | 0 |
| WNT3A_FZD6_LRP5 | 0 | | 0.069 | 0 | 0 |
| WNT4_FZD6_LRP5 | 0.069 | | 0 | 0 | 0 |
| WNT5A_FZD6_LRP5 | 0 | | 0 | 0 | 0 |
| WNT5B_FZD6_LRP5 | 0.068 | | 0 | 0 | 0 |
| WNT6_FZD6_LRP5 | 0 | | 0.069 | 0 | 0 |
| WNT7A_FZD6_LRP5 | 0 | | 0.07 | 0 | 0 |
| WNT7B_FZD6_LRP5 | 0 | | 0 | 0 | 0 |
| WNT8A_FZD6_LRP5 | 0 | | 0 | 0 | 0 |
| WNT8B_FZD6_LRP5 | 0 | | 0 | 0 | 0 |
| WNT9A_FZD6_LRP5 | 0.069 | | 0 | 0 | 0 |
| WNT9B_FZD6_LRP5 | 0 | | 0 | 0 | 0 |
| WNT1_FZD6_LRP6 | 0.182 | | 0.409 | 0 | 0 |
| WNT11_FZD6_LRP6 | 0.078 | | 0.117 | 0 | 0 |
| WNT16_FZD6_LRP6 | 0 | | 0 | 0 | 0 |
| WNT2_FZD6_LRP6 | 0 | | 0 | 0 | 0 |
| WNT2B_FZD6_LRP6 | 0.07 | | 0 | 0 | 0 |
| WNT3_FZD6_LRP6 | 0 | | 0.071 | 0 | 0 |
| WNT3A_FZD6_LRP6 | 0 | | 0.069 | 0 | 0 |
| WNT4_FZD6_LRP6 | 0.069 | | 0 | 0 | 0 |
| WNT5A_FZD6_LRP6 | 0 | | 0 | 0 | 0 |
| WNT5B_FZD6_LRP6 | 0.068 | | 0 | 0 | 0 |
| WNT6_FZD6_LRP6 | 0 | | 0.069 | 0 | 0 |
| WNT7A_FZD6_LRP6 | 0 | | 0.07 | 0 | 0 |
| WNT7B_FZD6_LRP6 | 0 | | 0 | 0 | 0 |
| WNT8A_FZD6_LRP6 | 0 | | 0 | 0 | 0 |
| WNT8B_FZD6_LRP6 | 0 | | 0 | 0 | 0 |
| WNT9A_FZD6_LRP6 | 0.069 | | 0 | 0 | 0 |
| WNT9B_FZD6_LRP6 | 0 | | 0 | 0 | 0 |
| WNT1_FZD7_LRP5 | 0.116 | | 0.343 | 0 | 0 |
| WNT10A_FZD7_LRP5 | 0.035 | | 0.048 | 0 | 0 |
| WNT11_FZD7_LRP5 | 0.012 | | 0.052 | 0 | 0 |
| WNT16_FZD7_LRP5 | 0 | | 0 | 0 | 0 |
| WNT2_FZD7_LRP5 | 0 | | 0 | 0 | 0 |
| WNT2B_FZD7_LRP5 | 0.004 | | 0 | 0 | 0 |
| WNT3_FZD7_LRP5 | 0 | | 0.005 | 0 | 0 |
| WNT3A_FZD7_LRP5 | 0 | | 0.003 | 0 | 0 |
| WNT4_FZD7_LRP5 | 0.003 | | 0 | 0 | 0 |
| WNT5A_FZD7_LRP5 | 0 | | 0 | 0 | 0 |
| WNT5B_FZD7_LRP5 | 0.003 | | 0 | 0 | 0 |
| WNT6_FZD7_LRP5 | 0 | | 0.003 | 0 | 0 |
| WNT7A_FZD7_LRP5 | 0 | | 0.004 | 0 | 0 |
| WNT7B_FZD7_LRP5 | 0 | | 0 | 0 | 0 |
| WNT8A_FZD7_LRP5 | 0 | | 0 | 0 | 0 |
| WNT8B_FZD7_LRP5 | 0 | | 0 | 0 | 0 |
| WNT9A_FZD7_LRP5 | 0.004 | | 0 | 0 | 0 |
| WNT9B_FZD7_LRP5 | 0 | | 0 | 0 | 0 |
| WNT1_FZD7_LRP6 | 0.116 | | 0.343 | 0 | 0 |
| WNT10A_FZD7_LRP6 | 0.035 | | 0.048 | 0 | 0 |
| WNT11_FZD7_LRP6 | 0.012 | | 0.052 | 0 | 0 |
| WNT16_FZD7_LRP6 | 0 | | 0 | 0 | 0 |
| WNT2_FZD7_LRP6 | 0 | | 0 | 0 | 0 |
| WNT2B_FZD7_LRP6 | 0.004 | | 0 | 0 | 0 |
| WNT3_FZD7_LRP6 | 0 | | 0.005 | 0 | 0 |
| WNT3A_FZD7_LRP6 | 0 | | 0.003 | 0 | 0 |
| WNT4_FZD7_LRP6 | 0.003 | | 0 | 0 | 0 |
| WNT5A_FZD7_LRP6 | 0 | | 0 | 0 | 0 |
| WNT5B_FZD7_LRP6 | 0.003 | | 0 | 0 | 0 |
| WNT6_FZD7_LRP6 | 0 | | 0.003 | 0 | 0 |
| WNT7A_FZD7_LRP6 | 0 | | 0.004 | 0 | 0 |
| WNT7B_FZD7_LRP6 | 0 | | 0 | 0 | 0 |
| WNT8A_FZD7_LRP6 | 0 | | 0 | 0 | 0 |
| WNT8B_FZD7_LRP6 | 0 | | 0 | 0 | 0 |
| WNT9A_FZD7_LRP6 | 0.004 | | 0 | 0 | 0 |
| WNT9B_FZD7_LRP6 | 0 | | 0 | 0 | 0 |
| WNT1_FZD8_LRP5 | 0.114 | | 0.341 | 0 | 0 |
| WNT10A_FZD8_LRP5 | 0.033 | | 0.046 | 0 | 0 |
| WNT11_FZD8_LRP5 | 0.01 | | 0.049 | 0 | 0 |
| WNT16_FZD8_LRP5 | 0 | | 0 | 0 | 0 |
| WNT2_FZD8_LRP5 | 0 | | 0 | 0 | 0 |
| WNT2B_FZD8_LRP5 | 0.002 | | 0 | 0 | 0 |
| WNT3_FZD8_LRP5 | 0 | | 0.003 | 0 | 0 |
| WNT3A_FZD8_LRP5 | 0 | | 0.001 | 0 | 0 |
| WNT4_FZD8_LRP5 | 0.001 | | 0 | 0 | 0 |
| WNT5A_FZD8_LRP5 | 0 | | 0 | 0 | 0 |
| WNT5B_FZD8_LRP5 | 0.001 | | 0 | 0 | 0 |
| WNT6_FZD8_LRP5 | 0 | | 0.001 | 0 | 0 |
| WNT7A_FZD8_LRP5 | 0 | | 0.002 | 0 | 0 |
| WNT7B_FZD8_LRP5 | 0 | | 0 | 0 | 0 |
| WNT8A_FZD8_LRP5 | 0 | | 0 | 0 | 0 |
| WNT8B_FZD8_LRP5 | 0 | | 0 | 0 | 0 |
| WNT9A_FZD8_LRP5 | 0.001 | | 0 | 0 | 0 |
| WNT9B_FZD8_LRP5 | 0 | | 0 | 0 | 0 |
| WNT1_FDZ8_RYK | 0.114 | | 0.341 | 0.003 | 0 |
| WNT3_FDZ8_RYK | 0 | | 0.003 | 0.024 | 0 |
| WNT3A_FDZ8_RYK | 0 | | 0.001 | 0.004 | 0 |
| WNT5A_FDZ8_RYK | 0 | | 0 | 0.007 | 0 |
| WNT1_FZD9_LRP5 | 0.116 | | 0.344 | 0 | 0 |
| WNT11_FZD9_LRP5 | 0.012 | | 0.052 | 0 | 0 |
| WNT16_FZD9_LRP5 | 0 | | 0 | 0 | 0 |
| WNT2_FZD9_LRP5 | 0 | | 0 | 0 | 0 |
| WNT2B_FZD9_LRP5 | 0.004 | | 0 | 0 | 0 |
| WNT3_FZD9_LRP5 | 0 | | 0.005 | 0 | 0 |
| WNT3A_FZD9_LRP5 | 0 | | 0.003 | 0 | 0 |
| WNT4_FZD9_LRP5 | 0.003 | | 0 | 0 | 0 |
| WNT5A_FZD9_LRP5 | 0 | | 0 | 0 | 0 |
| WNT5B_FZD9_LRP5 | 0.003 | | 0 | 0 | 0 |
| WNT6_FZD9_LRP5 | 0 | | 0.003 | 0 | 0 |
| WNT7A_FZD9_LRP5 | 0 | | 0.004 | 0 | 0 |
| WNT7B_FZD9_LRP5 | 0 | | 0 | 0 | 0 |
| WNT8A_FZD9_LRP5 | 0 | | 0 | 0 | 0 |
| WNT8B_FZD9_LRP5 | 0 | | 0 | 0 | 0 |
| WNT9A_FZD9_LRP5 | 0.004 | | 0 | 0 | 0 |
| WNT9B_FZD9_LRP5 | 0 | | 0 | 0 | 0 |
| WNT1_FZD9_LRP6 | 0.116 | | 0.344 | 0 | 0 |
| WNT11_FZD9_LRP6 | 0.012 | | 0.052 | 0 | 0 |
| WNT16_FZD9_LRP6 | 0 | | 0 | 0 | 0 |
| WNT2_FZD9_LRP6 | 0 | | 0 | 0 | 0 |
| WNT2B_FZD9_LRP6 | 0.004 | | 0 | 0 | 0 |
| WNT3_FZD9_LRP6 | 0 | | 0.005 | 0 | 0 |
| WNT3A_FZD9_LRP6 | 0 | | 0.003 | 0 | 0 |
| WNT4_FZD9_LRP6 | 0.003 | | 0 | 0 | 0 |
| WNT5A_FZD9_LRP6 | 0 | | 0 | 0 | 0 |
| WNT5B_FZD9_LRP6 | 0.003 | | 0 | 0 | 0 |
| WNT6_FZD9_LRP6 | 0 | | 0.003 | 0 | 0 |
| WNT7A_FZD9_LRP6 | 0 | | 0.004 | 0 | 0 |
| WNT7B_FZD9_LRP6 | 0 | | 0 | 0 | 0 |
| WNT8A_FZD9_LRP6 | 0 | | 0 | 0 | 0 |
| WNT8B_FZD9_LRP6 | 0 | | 0 | 0 | 0 |
| WNT9A_FZD9_LRP6 | 0.004 | | 0 | 0 | 0 |
| WNT9B_FZD9_LRP6 | 0 | | 0 | 0 | 0 |
| WNT1_SFRP2 | 0.13 | | 0.358 | 0 | 0 |
| WNT11_SFRP2 | 0.026 | | 0.066 | 0 | 0 |
| WNT16_SFRP2 | 0 | | 0 | 0 | 0 |
| WNT2_SFRP2 | 0 | | 0 | 0 | 0 |
| WNT2B_SFRP2 | 0.019 | | 0 | 0 | 0 |
| WNT3_SFRP2 | 0 | | 0.02 | 0 | 0 |
| WNT3A_SFRP2 | 0 | | 0.017 | 0 | 0 |
| WNT4_SFRP2 | 0.017 | | 0 | 0 | 0 |
| WNT5A_SFRP2 | 0 | | 0 | 0 | 0 |
| WNT5B_SFRP2 | 0.017 | | 0 | 0 | 0 |
| WNT6_SFRP2 | 0 | | 0.017 | 0 | 0 |
| WNT7A_SFRP2 | 0 | | 0.018 | 0 | 0 |
| WNT7B_SFRP2 | 0 | | 0 | 0 | 0 |
| WNT8A_SFRP2 | 0 | | 0 | 0 | 0 |
| WNT8B_SFRP2 | 0 | | 0 | 0 | 0 |
| WNT9A_SFRP2 | 0.018 | | 0 | 0 | 0 |
| WNT9B_SFRP2 | 0 | | 0 | 0 | 0 |
| WNT1_SFRP4 | 0.116 | | 0.343 | 0 | 0 |
| WNT11_SFRP4 | 0.011 | | 0.051 | 0 | 0 |
| WNT16_SFRP4 | 0 | | 0 | 0 | 0 |
| WNT2_SFRP4 | 0 | | 0 | 0 | 0 |
| WNT2B_SFRP4 | 0.004 | | 0 | 0 | 0 |
| WNT3_SFRP4 | 0 | | 0.005 | 0 | 0 |
| WNT3A_SFRP4 | 0 | | 0.002 | 0 | 0 |
| WNT4_SFRP4 | 0.003 | | 0 | 0 | 0 |
| WNT5A_SFRP4 | 0 | | 0 | 0 | 0 |
| WNT5B_SFRP4 | 0.002 | | 0 | 0 | 0 |
| WNT6_SFRP4 | 0 | | 0.002 | 0 | 0 |
| WNT7A_SFRP4 | 0 | | 0.004 | 0 | 0 |
| WNT7B_SFRP4 | 0 | | 0 | 0 | 0 |
| WNT8A_SFRP4 | 0 | | 0 | 0 | 0 |
| WNT8B_SFRP4 | 0 | | 0 | 0 | 0 |
| WNT9A_SFRP4 | 0.003 | | 0 | 0 | 0 |
| WNT9B_SFRP4 | 0 | | 0 | 0 | 0 |
| WNT1_SFRP5 | 0.242 | | 0.47 | 0.002 | 0 |
| WNT11_SFRP5 | 0.138 | | 0.178 | 0.004 | 0 |
| WNT16_SFRP5 | 0 | | 0 | 0.002 | 0 |
| WNT2_SFRP5 | 0 | | 0 | 0.04 | 0 |
| WNT2B_SFRP5 | 0.131 | | 0 | 0.011 | 0 |
| WNT3_SFRP5 | 0 | | 0.132 | 0.023 | 0 |
| WNT3A_SFRP5 | 0 | | 0.129 | 0.004 | 0 |
| WNT4_SFRP5 | 0.129 | | 0 | 0.016 | 0 |
| WNT5A_SFRP5 | 0 | | 0 | 0.007 | 0 |
| WNT5B_SFRP5 | 0.129 | | 0 | 0.041 | 0 |
| WNT6_SFRP5 | 0 | | 0.129 | 0.003 | 0 |
| WNT7A_SFRP5 | 0 | | 0.131 | 0.002 | 0 |
| WNT7B_SFRP5 | 0 | | 0 | 0.002 | 0 |
| WNT8A_SFRP5 | 0 | | 0 | 0.002 | 0 |
| WNT8B_SFRP5 | 0 | | 0 | 0.003 | 0 |
| WNT9A_SFRP5 | 0.13 | | 0 | 0.003 | 0 |
| WNT9B_SFRP5 | 0 | | 0 | 0.002 | 0 |
| WNT1_WIF1 | 0.118 | | 0.345 | 0 | 0 |
| WNT11_WIF1 | 0.014 | | 0.054 | 0 | 0 |
| WNT16_WIF1 | 0 | | 0 | 0 | 0 |
| WNT2_WIF1 | 0 | | 0 | 0 | 0 |
| WNT2B_WIF1 | 0.006 | | 0 | 0 | 0 |
| WNT3_WIF1 | 0 | | 0.007 | 0 | 0 |
| WNT3A_WIF1 | 0 | | 0.005 | 0 | 0 |
| WNT4_WIF1 | 0.005 | | 0 | 0 | 0 |
| WNT5A_WIF1 | 0 | | 0 | 0 | 0 |
| WNT5B_WIF1 | 0.005 | | 0 | 0 | 0 |
| WNT6_WIF1 | 0 | | 0.005 | 0 | 0 |
| WNT7A_WIF1 | 0 | | 0.006 | 0 | 0 |
| WNT7B_WIF1 | 0 | | 0 | 0 | 0 |
| WNT8A_WIF1 | 0 | | 0 | 0 | 0 |
| WNT8B_WIF1 | 0 | | 0 | 0 | 0 |
| WNT9A_WIF1 | 0.006 | | 0 | 0 | 0 |
| WNT9B_WIF1 | 0 | | 0 | 0 | 0 |
| WNT5A_ROR1 | 0 | | 0 | 0 | 0 |
| WNT5A_ROR2 | 0 | | 0 | 0.042 | 0.043 |
| INHBC_ACVR2A | 0 | | 0 | 0.168 | 0.163 |
| INHBE_ACVR2A | 0 | | 0 | 0.122 | 0.117 |
| INHBC_ACVR2B | 0 | | 0 | 0.166 | 0.166 |
| INHBE_ACVR2B | 0 | | 0 | 0.12 | 0.12 |
| ARTN_RET_receptor_1 | 0 | | 0 | 0 | 0 |
| GDNF_RET_receptor_1 | 0 | | 0 | 0 | 0 |
| ARTN_RET_receptor_3 | 0 | | 0 | 0 | 0 |
| ADIPOQ_ADR_complex | 0 | | 0 | 0.1 | 0.149 |
| ALB_FcRn_complex | 1.345 | | 0 | 123.371 | 123.365 |
| ALCAM_CD6 | 0.005 | | 0.001 | 1.515 | 1.574 |
| CD1B_complex_IL6ST | 0 | | 0 | 0.136 | 0.128 |
| BAG6_NCR3 | 0.238 | | 0.128 | 2.164 | 2.36 |
| NCR3LG1_NCR3 | 0.021 | | 0.061 | 1.86 | 2.056 |
| BST2_LILRA4 | 0.701 | | 0.54 | 1.216 | 0 |
| NRXN1_CBLN1_complex_GRID2 | 0 | | 0 | 0 | 0 |
| CD200_CD200R1 | 0.004 | | 0 | 0.075 | 0.065 |
| CD226_NECTIN2 | 1.161 | | 1.049 | 0 | 0 |
| CD248_IL6R | 0.205 | | 0 | 0.021 | 0.001 |
| CD274_CD80 | 0.018 | | 0.016 | 0.009 | 0 |
| CD274_PDCD1 | 0.018 | | 0.016 | 0.161 | 0.246 |
| PDCD1LG2_PDCD1 | 0 | | 0 | 0.161 | 0.245 |
| CD276_TREML2 | 0 | | 0 | 0.133 | 0.133 |
| CD320_JAML | 0.267 | | 0.132 | 0.98 | 1.219 |
| CD40LG_CD40 | 0.608 | | 0.355 | 0.007 | 0 |
| CD44_TYROBP | 1.42 | | 2.056 | 1.169 | 0.092 |
| CD47_SIRB1_complex | 0.822 | | 1.078 | 0.378 | 0.383 |
| CD47_SIRPA | 0.958 | | 1.214 | 0 | 0.371 |
| CD47_SIRPG | 0.822 | | 1.077 | 0.808 | 0.623 |
| CD48_CD244 | 1.688 | | 1.789 | 0.136 | 0.184 |
| CD58_CD2 | 0.498 | | 0.563 | 2.049 | 1.942 |
| CD70_CD27 | 0.314 | | 0.144 | 0.423 | 0.258 |
| CD80_CD28 | 0.008 | | 0 | 0.448 | 0.423 |
| CD86_CD28 | 0.001 | | 0 | 0.448 | 0.423 |
| CD80_CTLA4 | 0.008 | | 0 | 0.02 | 0.007 |
| CD86_CTLA4 | 0 | | 0 | 0.02 | 0.007 |
| CD93_IFNGR1 | 0 | | 0 | 0.932 | 1.28 |
| CD96_NECTIN1 | 1.501 | | 1.945 | 0.052 | 0.06 |
| CD99_PILRA | 2.768 | | 2.673 | 0.817 | 0 |
| CHL1_CHL1 | 0 | | 0 | 0 | 0 |
| CLCF1_CNTF_1R | 0.119 | | 0.171 | 0 | 0 |
| CNTF_CNTF_1R | 0 | | 0 | 0 | 0 |
| CRLF2_TSLPR | 0 | | 0 | 0 | 0 |
| TSLP_TSLPR | 0 | | 0 | 0 | 0 |
| EPO_EPOR | 0 | | 0 | 0.115 | 0.161 |
| ERVH48-1_SLC1A5 | 0 | | 0 | 0.469 | 0.372 |
| ESAM_ESAM | 0.035 | | 0.033 | 0.035 | 0.033 |
| FLT3LG_FLT3 | 1.579 | | 1.731 | 0 | 0.032 |
| FTH1_SCARA5 | 15.484 | | 14.184 | 0 | 0 |
| FTL_SCARA5 | 2.707 | | 0.291 | 0 | 0 |
| HGF_MET | 0 | | 0 | 0 | 0 |
| ICOSLG_ICOS | 0 | | 0 | 0.422 | 0.384 |
| KISS1_KISS1R | 0 | | 0 | 0.143 | 0.153 |
| KITLG_KIT | 0 | | 0 | 0.033 | 0.074 |
| KLRB1_CLEC2D | 6.446 | | 11.405 | 0.556 | 0.533 |
| LAIR1_LILRB4 | 0.237 | | 0.045 | 0 | 0 |
| LCK_CD8_receptor | 2.141 | | 2.143 | 1.269 | 0.378 |
| LCN2_SLC22A17 | 0 | | 0 | 0.479 | 0.476 |
| MPZL1_MPZL1 | 0.284 | | 0.279 | 0.284 | 0.279 |
| MST1_MST1R | 0 | | 0.002 | 0 | 0 |
| NELL2_ROBO3 | 0.163 | | 0.215 | 0.022 | 0.017 |
| NXNL1_SLC16A1_complex | 0 | | 0 | 0.088 | 0.081 |
| PECAM1_CD38 | 0.15 | | 0.005 | 0.041 | 0.038 |
| PPIA_BSG | 6.629 | | 6.274 | 7.467 | 7.221 |
| PROC_PROCR | 0 | | 0 | 1.329 | 1.301 |
| Prostacyclin_byPTGIS_PTGIR | 0.04 | | 0 | 0 | 0 |
| PTPRC_CD22 | 4.589 | | 4.721 | 0 | 0 |
| PTPRC_MRC1 | 4.587 | | 4.719 | 0 | 0 |
| PTPRD_IL1RAP | 0 | | 0 | 0.204 | 0.194 |
| PTPRD_IL1RAPL1 | 0 | | 0 | 0 | 0 |
| REN_ATP6AP2 | 0 | | 0.414 | 0.368 | 0.447 |
| RNASET2_TLR8 | 0.837 | | 0.643 | 0 | 0 |
| SIGLEC15_CD44 | 0 | | 0 | 1.474 | 2.11 |
| SPN_SIGLEC1 | 0.507 | | 0.52 | 0 | 0 |
| THPO_MPL | 0 | | 0 | 0.029 | 0 |
| CD177_PECAM1 | 0 | | 0.002 | 0.149 | 0.005 |

**Supplementary Table 15** False discovery rate (FDR)–adjusted P values corresponding to the malignant hepatocyte–MAIT cell interaction scores shown in Supplementary Table 14, as determined by CellPhoneDB permutation testing.

| **Interacting pair** | | **Primary_MAIT|Malignant Hepatocyte** | **Relapsed_MAIT|Malignant Hepatocyte** | **Malignant Hepatocyte|Primary_MAIT** | **Malignant Hepatocyte|Relapsed_MAIT** |
| --- | --- | --- | --- | --- | --- |
| CDH1_integrin_a2b1_complex | | 1 | 1 | 1 | 1 |
| COL10A1_integrin_a2b1_complex | | 1 | 1 | 1 | 1 |
| COL11A1_integrin_a2b1_complex | | 1 | 1 | 1 | 1 |
| COL11A2_integrin_a2b1_complex | | 1 | 1 | 1 | 1 |
| COL12A1_integrin_a2b1_complex | | 1 | 1 | 1 | 1 |
| COL13A1_integrin_a2b1_complex | | 1 | 1 | 1 | 1 |
| COL14A1_integrin_a2b1_complex | | 1 | 1 | 1 | 1 |
| COL15A1_integrin_a2b1_complex | | 1 | 1 | 1 | 1 |
| COL16A1_integrin_a2b1_complex | | 1 | 1 | 1 | 1 |
| COL17A1_integrin_a2b1_complex | | 1 | 1 | 1 | 1 |
| COL18A1_integrin_a2b1_complex | | 1 | 1 | 1 | 1 |
| COL19A1_integrin_a2b1_complex | | 1 | 1 | 1 | 1 |
| COL1A1_integrin_a2b1_complex | | 1 | 1 | 1 | 1 |
| COL20A1_integrin_a2b1_complex | | 1 | 1 | 1 | 1 |
| COL21A1_integrin_a2b1_complex | | 1 | 1 | 1 | 1 |
| COL22A1_integrin_a2b1_complex | | 1 | 1 | 1 | 1 |
| COL24A1_integrin_a2b1_complex | | 1 | 1 | 1 | 1 |
| COL26A1_integrin_a2b1_complex | | 1 | 1 | 1 | 1 |
| COL27A1_integrin_a2b1_complex | | 1 | 1 | 1 | 1 |
| COL28A1_integrin_a2b1_complex | | 1 | 1 | 1 | 1 |
| COL2A1_integrin_a2b1_complex | | 1 | 1 | 1 | 1 |
| COL3A1_integrin_a2b1_complex | | 1 | 1 | 1 | 1 |
| COL4A2_integrin_a2b1_complex | | 1 | 1 | 1 | 1 |
| COL4A3_integrin_a2b1_complex | | 1 | 1 | 1 | 1 |
| COL4A4_integrin_a2b1_complex | | 1 | 1 | 1 | 1 |
| COL4A5_integrin_a2b1_complex | | 1 | 1 | 1 | 1 |
| COL4A6_integrin_a2b1_complex | | 1 | 1 | 1 | 1 |
| COL5A1_integrin_a2b1_complex | | 1 | 1 | 1 | 1 |
| COL5A2_integrin_a2b1_complex | | 1 | 1 | 1 | 1 |
| COL5A3_integrin_a2b1_complex | | 1 | 1 | 1 | 1 |
| COL6A1_integrin_a2b1_complex | | 1 | 1 | 1 | 1 |
| COL6A2_integrin_a2b1_complex | | 1 | 1 | 1 | 1 |
| COL6A3_integrin_a2b1_complex | | 1 | 1 | 1 | 1 |
| COL6A5_integrin_a2b1_complex | | 1 | 1 | 1 | 1 |
| COL6A6_integrin_a2b1_complex | | 1 | 1 | 1 | 1 |
| COL7A1_integrin_a2b1_complex | | 1 | 1 | 1 | 1 |
| COL8A1_integrin_a2b1_complex | | 1 | 1 | 1 | 1 |
| COL8A2_integrin_a2b1_complex | | 1 | 1 | 1 | 1 |
| COL9A1_integrin_a2b1_complex | | 1 | 1 | 1 | 1 |
| COL9A2_integrin_a2b1_complex | | 1 | 1 | 1 | 1 |
| COL9A3_integrin_a2b1_complex | | 1 | 1 | 1 | 1 |
| FN1_integrin_a2b1_complex | | 1 | 1 | 1 | 1 |
| LAMC1_integrin_a2b1_complex | | 1 | 1 | 1 | 1 |
| CDH1_integrin_aEb7_complex | | 1 | 1 | 0 | 0 |
| CDH1_KLRG1 | | 1 | 1 | 0 | 0 |
| CDH2_CDH2 | | 1 | 1 | 1 | 1 |
| CDH2_FCER2 | | 1 | 1 | 1 | 1 |
| CDH3_CDH3 | | 1 | 1 | 1 | 1 |
| CDH5_CDH5 | | 1 | 1 | 1 | 1 |
| CDH6_CDH6 | | 1 | 1 | 1 | 1 |
| CDH7_CDH7 | | 1 | 1 | 1 | 1 |
| CADM1_CADM1 | | 1 | 1 | 1 | 1 |
| CADM3_CADM1 | | 1 | 1 | 1 | 1 |
| CRTAM_CADM1 | | 1 | 1 | 1 | 1 |
| CADM1_NECTIN3 | | 1 | 1 | 1 | 1 |
| CADM3_NECTIN3 | | 1 | 1 | 1 | 1 |
| NECTIN1_NECTIN3 | | 1 | 1 | 1 | 1 |
| NECTIN2_NECTIN3 | | 1 | 1 | 1 | 1 |
| CADM3_CADM4 | | 1 | 1 | 1 | 1 |
| CADM3_EPB41L1 | | 1 | 1 | 1 | 1 |
| CEACAM1_CD209 | | 1 | 1 | 1 | 1 |
| ICAM2_CD209 | | 1 | 1 | 1 | 1 |
| ICAM3_CD209 | | 1 | 1 | 1 | 1 |
| CEACAM1_CEACAM6 | | 1 | 1 | 1 | 1 |
| CEACAM6_CEACAM6 | | 1 | 1 | 1 | 1 |
| CEACAM8_CEACAM6 | | 1 | 1 | 1 | 1 |
| CEACAM1_CEACAM8 | | 1 | 1 | 1 | 1 |
| CEACAM1_SELE | | 1 | 1 | 1 | 1 |
| PODXL2_SELE | | 1 | 1 | 1 | 1 |
| SELPLG_SELE | | 1 | 1 | 1 | 1 |
| CD44_SELE | | 1 | 1 | 1 | 1 |
| COL10A1_integrin_a1b1_complex | | 1 | 1 | 1 | 1 |
| COL11A1_integrin_a1b1_complex | | 1 | 1 | 1 | 1 |
| COL11A2_integrin_a1b1_complex | | 1 | 1 | 1 | 1 |
| COL12A1_integrin_a1b1_complex | | 1 | 1 | 1 | 1 |
| COL13A1_integrin_a1b1_complex | | 1 | 1 | 1 | 1 |
| COL14A1_integrin_a1b1_complex | | 1 | 1 | 1 | 1 |
| COL15A1_integrin_a1b1_complex | | 1 | 1 | 1 | 1 |
| COL16A1_integrin_a1b1_complex | | 1 | 1 | 1 | 1 |
| COL17A1_integrin_a1b1_complex | | 1 | 1 | 1 | 1 |
| COL18A1_integrin_a1b1_complex | | 1 | 1 | 1 | 1 |
| COL19A1_integrin_a1b1_complex | | 1 | 1 | 1 | 1 |
| COL1A1_integrin_a1b1_complex | | 1 | 1 | 1 | 1 |
| COL20A1_integrin_a1b1_complex | | 1 | 1 | 1 | 1 |
| COL21A1_integrin_a1b1_complex | | 1 | 1 | 1 | 1 |
| COL22A1_integrin_a1b1_complex | | 1 | 1 | 1 | 1 |
| COL24A1_integrin_a1b1_complex | | 1 | 1 | 1 | 1 |
| COL26A1_integrin_a1b1_complex | | 1 | 1 | 1 | 1 |
| COL27A1_integrin_a1b1_complex | | 1 | 1 | 1 | 1 |
| COL28A1_integrin_a1b1_complex | | 1 | 1 | 1 | 1 |
| COL2A1_integrin_a1b1_complex | | 1 | 1 | 1 | 1 |
| COL3A1_integrin_a1b1_complex | | 1 | 1 | 1 | 1 |
| COL4A2_integrin_a1b1_complex | | 1 | 1 | 1 | 1 |
| COL4A3_integrin_a1b1_complex | | 1 | 1 | 1 | 1 |
| COL4A4_integrin_a1b1_complex | | 1 | 1 | 1 | 1 |
| COL4A5_integrin_a1b1_complex | | 1 | 1 | 1 | 1 |
| COL4A6_integrin_a1b1_complex | | 1 | 1 | 1 | 1 |
| COL5A1_integrin_a1b1_complex | | 1 | 1 | 1 | 1 |
| COL5A2_integrin_a1b1_complex | | 1 | 1 | 1 | 1 |
| COL5A3_integrin_a1b1_complex | | 1 | 1 | 1 | 1 |
| COL6A1_integrin_a1b1_complex | | 1 | 1 | 1 | 1 |
| COL6A2_integrin_a1b1_complex | | 0 | 1 | 1 | 1 |
| COL6A3_integrin_a1b1_complex | | 1 | 1 | 1 | 1 |
| COL6A5_integrin_a1b1_complex | | 1 | 1 | 1 | 1 |
| COL6A6_integrin_a1b1_complex | | 1 | 1 | 1 | 1 |
| COL7A1_integrin_a1b1_complex | | 1 | 1 | 1 | 1 |
| COL8A1_integrin_a1b1_complex | | 1 | 1 | 1 | 1 |
| COL8A2_integrin_a1b1_complex | | 1 | 1 | 1 | 1 |
| COL9A1_integrin_a1b1_complex | | 1 | 1 | 1 | 1 |
| COL9A2_integrin_a1b1_complex | | 1 | 1 | 1 | 1 |
| COL9A3_integrin_a1b1_complex | | 1 | 1 | 1 | 1 |
| SEMA7A_integrin_a1b1_complex | | 1 | 1 | 1 | 1 |
| COL10A1_integrin_a10b1_complex | | 1 | 1 | 1 | 1 |
| COL11A1_integrin_a10b1_complex | | 1 | 1 | 1 | 1 |
| COL11A2_integrin_a10b1_complex | | 1 | 1 | 1 | 1 |
| COL12A1_integrin_a10b1_complex | | 1 | 1 | 1 | 1 |
| COL13A1_integrin_a10b1_complex | | 1 | 1 | 1 | 1 |
| COL14A1_integrin_a10b1_complex | | 1 | 1 | 1 | 1 |
| COL15A1_integrin_a10b1_complex | | 1 | 1 | 1 | 1 |
| COL16A1_integrin_a10b1_complex | | 1 | 1 | 1 | 1 |
| COL17A1_integrin_a10b1_complex | | 1 | 1 | 1 | 1 |
| COL18A1_integrin_a10b1_complex | | 1 | 1 | 1 | 1 |
| COL19A1_integrin_a10b1_complex | | 1 | 1 | 1 | 1 |
| COL1A1_integrin_a10b1_complex | | 1 | 1 | 1 | 1 |
| COL20A1_integrin_a10b1_complex | | 1 | 1 | 1 | 1 |
| COL21A1_integrin_a10b1_complex | | 1 | 1 | 1 | 1 |
| COL22A1_integrin_a10b1_complex | | 1 | 1 | 1 | 1 |
| COL24A1_integrin_a10b1_complex | | 1 | 1 | 1 | 1 |
| COL26A1_integrin_a10b1_complex | | 1 | 1 | 1 | 1 |
| COL27A1_integrin_a10b1_complex | | 1 | 1 | 1 | 1 |
| COL28A1_integrin_a10b1_complex | | 1 | 1 | 1 | 1 |
| COL2A1_integrin_a10b1_complex | | 1 | 1 | 1 | 1 |
| COL3A1_integrin_a10b1_complex | | 1 | 1 | 1 | 1 |
| COL4A2_integrin_a10b1_complex | | 1 | 1 | 1 | 1 |
| COL4A3_integrin_a10b1_complex | | 1 | 1 | 1 | 1 |
| COL4A4_integrin_a10b1_complex | | 1 | 1 | 1 | 1 |
| COL4A5_integrin_a10b1_complex | | 1 | 1 | 1 | 1 |
| COL4A6_integrin_a10b1_complex | | 1 | 1 | 1 | 1 |
| COL5A1_integrin_a10b1_complex | | 1 | 1 | 1 | 1 |
| COL5A2_integrin_a10b1_complex | | 1 | 1 | 1 | 1 |
| COL5A3_integrin_a10b1_complex | | 1 | 1 | 1 | 1 |
| COL6A1_integrin_a10b1_complex | | 1 | 1 | 1 | 1 |
| COL6A2_integrin_a10b1_complex | | 1 | 1 | 1 | 1 |
| COL6A3_integrin_a10b1_complex | | 1 | 1 | 1 | 1 |
| COL6A5_integrin_a10b1_complex | | 1 | 1 | 1 | 1 |
| COL6A6_integrin_a10b1_complex | | 1 | 1 | 1 | 1 |
| COL7A1_integrin_a10b1_complex | | 1 | 1 | 1 | 1 |
| COL8A1_integrin_a10b1_complex | | 1 | 1 | 1 | 1 |
| COL8A2_integrin_a10b1_complex | | 1 | 1 | 1 | 1 |
| COL9A1_integrin_a10b1_complex | | 1 | 1 | 1 | 1 |
| COL9A2_integrin_a10b1_complex | | 1 | 1 | 1 | 1 |
| COL9A3_integrin_a10b1_complex | | 1 | 1 | 1 | 1 |
| FN1_integrin_a10b1_complex | | 1 | 1 | 1 | 1 |
| COL10A1_integrin_a11b1_complex | | 1 | 1 | 1 | 1 |
| COL11A1_integrin_a11b1_complex | | 1 | 1 | 1 | 1 |
| COL11A2_integrin_a11b1_complex | | 1 | 1 | 1 | 1 |
| COL12A1_integrin_a11b1_complex | | 1 | 1 | 1 | 1 |
| COL13A1_integrin_a11b1_complex | | 1 | 1 | 1 | 1 |
| COL14A1_integrin_a11b1_complex | | 1 | 1 | 1 | 1 |
| COL15A1_integrin_a11b1_complex | | 1 | 1 | 1 | 1 |
| COL16A1_integrin_a11b1_complex | | 1 | 1 | 1 | 1 |
| COL17A1_integrin_a11b1_complex | | 1 | 1 | 1 | 1 |
| COL18A1_integrin_a11b1_complex | | 1 | 1 | 1 | 1 |
| COL19A1_integrin_a11b1_complex | | 1 | 1 | 1 | 1 |
| COL1A1_integrin_a11b1_complex | | 1 | 1 | 1 | 1 |
| COL20A1_integrin_a11b1_complex | | 1 | 1 | 1 | 1 |
| COL21A1_integrin_a11b1_complex | | 1 | 1 | 1 | 1 |
| COL22A1_integrin_a11b1_complex | | 1 | 1 | 1 | 1 |
| COL24A1_integrin_a11b1_complex | | 1 | 1 | 1 | 1 |
| COL26A1_integrin_a11b1_complex | | 1 | 1 | 1 | 1 |
| COL27A1_integrin_a11b1_complex | | 1 | 1 | 1 | 1 |
| COL28A1_integrin_a11b1_complex | | 1 | 1 | 1 | 1 |
| COL2A1_integrin_a11b1_complex | | 1 | 1 | 1 | 1 |
| COL3A1_integrin_a11b1_complex | | 1 | 1 | 1 | 1 |
| COL4A2_integrin_a11b1_complex | | 1 | 1 | 1 | 1 |
| COL4A3_integrin_a11b1_complex | | 1 | 1 | 1 | 1 |
| COL4A4_integrin_a11b1_complex | | 1 | 1 | 1 | 1 |
| COL4A5_integrin_a11b1_complex | | 1 | 1 | 1 | 1 |
| COL4A6_integrin_a11b1_complex | | 1 | 1 | 1 | 1 |
| COL5A1_integrin_a11b1_complex | | 1 | 1 | 1 | 1 |
| COL5A2_integrin_a11b1_complex | | 1 | 1 | 1 | 1 |
| COL5A3_integrin_a11b1_complex | | 1 | 1 | 1 | 1 |
| COL6A1_integrin_a11b1_complex | | 1 | 1 | 1 | 1 |
| COL6A2_integrin_a11b1_complex | | 1 | 1 | 1 | 1 |
| COL6A3_integrin_a11b1_complex | | 1 | 1 | 1 | 1 |
| COL6A5_integrin_a11b1_complex | | 1 | 1 | 1 | 1 |
| COL6A6_integrin_a11b1_complex | | 1 | 1 | 1 | 1 |
| COL7A1_integrin_a11b1_complex | | 1 | 1 | 1 | 1 |
| COL8A1_integrin_a11b1_complex | | 1 | 1 | 1 | 1 |
| COL8A2_integrin_a11b1_complex | | 1 | 1 | 1 | 1 |
| COL9A1_integrin_a11b1_complex | | 1 | 1 | 1 | 1 |
| COL9A2_integrin_a11b1_complex | | 1 | 1 | 1 | 1 |
| COL9A3_integrin_a11b1_complex | | 1 | 1 | 1 | 1 |
| FN1_integrin_a11b1_complex | | 1 | 1 | 1 | 1 |
| COL3A1_ADGRG1 | | 1 | 1 | 1 | 1 |
| GAST_ADGRG1 | | 1 | 1 | 1 | 1 |
| TGM2_ADGRG1 | | 1 | 1 | 1 | 1 |
| COL4A2_ADGRG6 | | 1 | 1 | 1 | 1 |
| COL4A3_ADGRG6 | | 1 | 1 | 1 | 1 |
| COL4A4_ADGRG6 | | 1 | 1 | 1 | 1 |
| COL4A5_ADGRG6 | | 1 | 1 | 1 | 1 |
| COL4A6_ADGRG6 | | 1 | 1 | 1 | 1 |
| LAMA2_ADGRG6 | | 1 | 1 | 1 | 1 |
| PRNP_ADGRG6 | | 0 | 0 | 1 | 1 |
| DSC1_DSG2 | | 1 | 1 | 1 | 1 |
| DSC2_DSG2 | | 1 | 1 | 1 | 1 |
| DSG1_DSC1 | | 1 | 1 | 1 | 1 |
| DSG1_DSC2 | | 1 | 1 | 1 | 1 |
| DSG1_DSC3 | | 1 | 1 | 1 | 1 |
| DSG2_DSC3 | | 1 | 1 | 1 | 1 |
| DAG1_CELSR3 | | 1 | 1 | 1 | 1 |
| DAG1_NRXN3 | | 1 | 1 | 1 | 1 |
| CLSTN1_NRXN3 | | 1 | 1 | 1 | 1 |
| CLSTN2_NRXN3 | | 1 | 1 | 1 | 1 |
| CLSTN3_NRXN3 | | 1 | 0 | 1 | 1 |
| LRRTM2_NRXN3 | | 1 | 1 | 1 | 1 |
| LRRTM3_NRXN3 | | 1 | 1 | 1 | 1 |
| LRRTM4_NRXN3 | | 1 | 1 | 1 | 1 |
| NLGN1_NRXN3 | | 1 | 1 | 1 | 1 |
| NLGN2_NRXN3 | | 1 | 1 | 1 | 1 |
| NLGN3_NRXN3 | | 1 | 1 | 1 | 1 |
| NLGN4X_NRXN3 | | 1 | 1 | 1 | 1 |
| NLGN4Y_NRXN3 | | 1 | 1 | 1 | 1 |
| fibrinogen_integrin_a2Bb3_complex | | 1 | 1 | 1 | 1 |
| FN1_integrin_a2Bb3_complex | | 1 | 1 | 1 | 1 |
| L1CAM_integrin_a2Bb3_complex | | 1 | 1 | 1 | 1 |
| F2_integrin_a2Bb3_complex | | 1 | 1 | 1 | 1 |
| THBS1_integrin_a2Bb3_complex | | 1 | 1 | 1 | 1 |
| VTN_integrin_a2Bb3_complex | | 1 | 1 | 1 | 1 |
| CD40LG_integrin_a2Bb3_complex | | 1 | 1 | 1 | 1 |
| PLG_integrin_a2Bb3_complex | | 1 | 1 | 1 | 1 |
| fibrinogen_integrin_aMb2_complex | | 1 | 1 | 1 | 1 |
| ICAM1_integrin_aMb2_complex | | 1 | 1 | 1 | 1 |
| JAM3_integrin_aMb2_complex | | 1 | 1 | 1 | 1 |
| F10_integrin_aMb2_complex | | 1 | 1 | 1 | 1 |
| C3_integrin_aMb2_complex | | 1 | 1 | 1 | 1 |
| FCER2_integrin_aMb2_complex | | 1 | 1 | 1 | 1 |
| THY1_integrin_aMb2_complex | | 1 | 1 | 1 | 1 |
| GP1BA_integrin_aMb2_complex | | 1 | 1 | 1 | 1 |
| fibrinogen_integrin_aXb2_complex | | 1 | 1 | 1 | 1 |
| ICAM1_integrin_aXb2_complex | | 1 | 1 | 1 | 1 |
| FCER2_integrin_aXb2_complex | | 1 | 1 | 1 | 1 |
| THY1_integrin_aXb2_complex | | 1 | 1 | 1 | 1 |
| FN1_integrin_a3b1_complex | | 1 | 1 | 1 | 1 |
| LAMA3_integrin_a3b1_complex | | 1 | 1 | 1 | 1 |
| THBS1_integrin_a3b1_complex | | 1 | 1 | 1 | 1 |
| CSPG4_integrin_a3b1_complex | | 1 | 1 | 1 | 1 |
| FN1_integrin_a4b1_complex | | 1 | 1 | 0 | 1 |
| JAM2_integrin_a4b1_complex | | 1 | 1 | 1 | 1 |
| SPP1_integrin_a4b1_complex | | 1 | 1 | 0 | 1 |
| TNC_integrin_a4b1_complex | | 1 | 1 | 1 | 1 |
| VCAM1_integrin_a4b1_complex | | 1 | 1 | 0 | 1 |
| PLA2G2A_integrin_a4b1_complex | | 1 | 1 | 0 | 1 |
| PLAUR_integrin_a4b1_complex | | 1 | 1 | 1 | 1 |
| FN1_integrin_a4b7_complex | | 1 | 1 | 0 | 0 |
| VCAM1_integrin_a4b7_complex | | 1 | 1 | 0 | 0 |
| MADCAM1_integrin_a4b7_complex | | 1 | 1 | 1 | 1 |
| FN1_integrin_a5b1_complex | | 1 | 1 | 1 | 1 |
| L1CAM_integrin_a5b1_complex | | 1 | 1 | 1 | 1 |
| PLA2G2A_integrin_a5b1_complex | | 1 | 1 | 1 | 1 |
| CD40LG_integrin_a5b1_complex | | 0 | 0 | 1 | 1 |
| FBN1_integrin_a5b1_complex | | 1 | 1 | 1 | 1 |
| FN1_integrin_a8b1_complex | | 1 | 1 | 1 | 1 |
| TNC_integrin_a8b1_complex | | 1 | 1 | 1 | 1 |
| FN1_integrin_aVb1_complex | | 1 | 1 | 1 | 1 |
| L1CAM_integrin_aVb1_complex | | 1 | 1 | 1 | 1 |
| VTN_integrin_aVb1_complex | | 1 | 1 | 1 | 1 |
| FN1_integrin_aVb3_complex | | 1 | 1 | 1 | 1 |
| L1CAM_integrin_aVb3_complex | | 1 | 1 | 1 | 1 |
| LAMC1_integrin_aVb3_complex | | 1 | 1 | 1 | 1 |
| SPP1_integrin_aVb3_complex | | 1 | 1 | 1 | 1 |
| F2_integrin_aVb3_complex | | 1 | 1 | 1 | 1 |
| TNC_integrin_aVb3_complex | | 1 | 1 | 1 | 1 |
| THBS1_integrin_aVb3_complex | | 1 | 1 | 1 | 1 |
| VTN_integrin_aVb3_complex | | 1 | 1 | 1 | 1 |
| FCER2_integrin_aVb3_complex | | 1 | 1 | 1 | 1 |
| FGF1_integrin_aVb3_complex | | 1 | 1 | 1 | 1 |
| FGF2_integrin_aVb3_complex | | 1 | 1 | 1 | 1 |
| IGF1_integrin_aVb3_complex | | 1 | 1 | 1 | 1 |
| PLAUR_integrin_aVb3_complex | | 1 | 1 | 1 | 1 |
| THY1_integrin_aVb3_complex | | 1 | 1 | 1 | 1 |
| VWF_integrin_aVb3_complex | | 1 | 1 | 1 | 1 |
| MMP2_integrin_aVb3_complex | | 1 | 1 | 1 | 1 |
| OMD_integrin_aVb3_complex | | 1 | 1 | 1 | 1 |
| FN1_integrin_aVb5_complex | | 1 | 1 | 1 | 1 |
| GJA1_GJA1 | | 1 | 1 | 1 | 1 |
| GJA3_GJA1 | | 1 | 1 | 1 | 1 |
| GJC1_GJA1 | | 1 | 1 | 1 | 1 |
| GJA1_GJA5 | | 1 | 1 | 1 | 1 |
| GJA3_GJA5 | | 1 | 1 | 1 | 1 |
| GJA5_GJA5 | | 1 | 1 | 1 | 1 |
| GJC1_GJA5 | | 1 | 1 | 1 | 1 |
| GJA3_GJA3 | | 1 | 1 | 1 | 1 |
| GJA3_GJC1 | | 1 | 1 | 1 | 1 |
| GJC1_GJC1 | | 1 | 1 | 1 | 1 |
| ICAM1_ITGAL | | 1 | 1 | 0 | 0 |
| ICAM1_integrin_aLb2_complex | | 1 | 1 | 0 | 0 |
| ICAM2_integrin_aLb2_complex | | 1 | 1 | 0 | 0 |
| ICAM3_integrin_aLb2_complex | | 1 | 1 | 0 | 0 |
| ICAM4_integrin_aLb2_complex | | 1 | 1 | 1 | 1 |
| F11R_integrin_aLb2_complex | | 1 | 1 | 0 | 0 |
| ICAM1_SPN | | 1 | 1 | 0 | 0 |
| ICAM3_integrin_aDb2_complex | | 1 | 1 | 1 | 1 |
| VCAM1_integrin_aDb2_complex | | 1 | 1 | 1 | 1 |
| JAM2_JAM3 | | 1 | 1 | 1 | 1 |
| JAM3_JAM3 | | 1 | 1 | 1 | 1 |
| L1CAM_pL1:Ezrin | | 1 | 1 | 1 | 1 |
| L1CAM_integrin_a9b1_complex | | 1 | 1 | 1 | 1 |
| SPP1_integrin_a9b1_complex | | 1 | 1 | 1 | 1 |
| TNC_integrin_a9b1_complex | | 1 | 1 | 1 | 1 |
| VCAM1_integrin_a9b1_complex | | 1 | 1 | 1 | 1 |
| L1CAM_L1CAM | | 1 | 1 | 1 | 1 |
| CHL1_L1CAM | | 1 | 1 | 1 | 1 |
| LAMC1_integrin_a6b1_complex | | 1 | 1 | 0 | 1 |
| LAMC1_integrin_a7b1_complex | | 1 | 1 | 1 | 1 |
| NECTIN1_CADM3 | | 1 | 1 | 1 | 1 |
| NECTIN1_NECTIN4 | | 1 | 1 | 1 | 1 |
| NECTIN2_TIGIT | | 1 | 1 | 1 | 1 |
| NECTIN3_TIGIT | | 1 | 1 | 1 | 1 |
| PVR_TIGIT | | 1 | 1 | 1 | 1 |
| F2_F2R | | 1 | 1 | 1 | 1 |
| F2_F2RL2 | | 1 | 1 | 1 | 1 |
| F2_F2RL3 | | 1 | 1 | 1 | 1 |
| CTSG_F2RL3 | | 1 | 1 | 1 | 1 |
| F2_Glycoprotein_Ib_complex | | 1 | 1 | 1 | 1 |
| VWF_Glycoprotein_Ib_complex | | 1 | 1 | 1 | 1 |
| F2_THBD | | 1 | 1 | 1 | 1 |
| TNC_integrin_aVb6_complex | | 1 | 1 | 1 | 1 |
| TGFB1_integrin_aVb6_complex | | 1 | 1 | 1 | 1 |
| TGFB3_integrin_aVb6_complex | | 1 | 1 | 1 | 1 |
| THBS1_CD36 | | 1 | 1 | 1 | 1 |
| Adenosine_byNT5E_and_SLC29A1_ADORA1 | | 1 | 1 | 1 | 1 |
| Adenosine_byNT5E_and_SLC29A2_ADORA1 | | 1 | 1 | 1 | 1 |
| Adenosine_byNT5E_and_SLC29A3_ADORA1 | | 1 | 1 | 1 | 1 |
| Adenosine_byNT5E_and_SLC29A4_ADORA1 | | 1 | 1 | 1 | 1 |
| ENTPD1_ADORA1 | | 1 | 1 | 1 | 1 |
| Adenosine_byNT5E_and_SLC29A1_ADORA2A | | 1 | 1 | 0 | 1 |
| Adenosine_byNT5E_and_SLC29A2_ADORA2A | | 1 | 1 | 1 | 1 |
| Adenosine_byNT5E_and_SLC29A3_ADORA2A | | 1 | 1 | 0 | 1 |
| Adenosine_byNT5E_and_SLC29A4_ADORA2A | | 1 | 1 | 0 | 1 |
| ENTPD1_ADORA2A | | 1 | 1 | 1 | 1 |
| Adenosine_byNT5E_and_SLC29A1_ADORA2B | | 1 | 1 | 1 | 1 |
| Adenosine_byNT5E_and_SLC29A2_ADORA2B | | 1 | 1 | 1 | 1 |
| Adenosine_byNT5E_and_SLC29A3_ADORA2B | | 1 | 1 | 1 | 1 |
| Adenosine_byNT5E_and_SLC29A4_ADORA2B | | 1 | 1 | 1 | 1 |
| ENTPD1_ADORA2B | | 1 | 1 | 1 | 1 |
| Adenosine_byNT5E_and_SLC29A1_ADORA3 | | 1 | 1 | 1 | 1 |
| Adenosine_byNT5E_and_SLC29A2_ADORA3 | | 1 | 1 | 1 | 1 |
| Adenosine_byNT5E_and_SLC29A3_ADORA3 | | 1 | 1 | 1 | 1 |
| Adenosine_byNT5E_and_SLC29A4_ADORA3 | | 1 | 1 | 1 | 1 |
| ENTPD1_ADORA3 | | 1 | 1 | 1 | 1 |
| Adrenaline_byPNMT_and_SLC18A2_ADRA1A | | 1 | 1 | 1 | 1 |
| Epinephrine_byPNMT_ADRA1A | | 1 | 1 | 1 | 1 |
| Noradrenaline_byDBH_and_SLC18A2_ADRA1A | | 1 | 1 | 1 | 1 |
| Noradrenaline_byDBH_and_SLC6A2_ADRA1A | | 1 | 1 | 1 | 1 |
| Adrenaline_byPNMT_and_SLC18A2_ADRA1B | | 1 | 1 | 1 | 1 |
| Epinephrine_byPNMT_ADRA1B | | 1 | 1 | 1 | 1 |
| Noradrenaline_byDBH_and_SLC18A2_ADRA1B | | 1 | 1 | 1 | 1 |
| Noradrenaline_byDBH_and_SLC6A2_ADRA1B | | 1 | 1 | 1 | 1 |
| Adrenaline_byPNMT_and_SLC18A2_ADRA1D | | 1 | 1 | 1 | 1 |
| Epinephrine_byPNMT_ADRA1D | | 1 | 1 | 1 | 1 |
| Noradrenaline_byDBH_and_SLC18A2_ADRA1D | | 1 | 1 | 1 | 1 |
| Noradrenaline_byDBH_and_SLC6A2_ADRA1D | | 1 | 1 | 1 | 1 |
| Adrenaline_byPNMT_and_SLC18A2_ADRA2A | | 1 | 1 | 1 | 1 |
| Epinephrine_byPNMT_ADRA2A | | 1 | 1 | 1 | 1 |
| Noradrenaline_byDBH_and_SLC18A2_ADRA2A | | 1 | 1 | 1 | 1 |
| Noradrenaline_byDBH_and_SLC6A2_ADRA2A | | 1 | 1 | 1 | 1 |
| Adrenaline_byPNMT_and_SLC18A2_ADRA2B | | 1 | 1 | 1 | 1 |
| Epinephrine_byPNMT_ADRA2B | | 1 | 1 | 1 | 1 |
| Noradrenaline_byDBH_and_SLC18A2_ADRA2B | | 1 | 1 | 1 | 1 |
| Noradrenaline_byDBH_and_SLC6A2_ADRA2B | | 1 | 1 | 1 | 1 |
| Adrenaline_byPNMT_and_SLC18A2_ADRA2C | | 1 | 1 | 1 | 1 |
| Epinephrine_byPNMT_ADRA2C | | 1 | 1 | 1 | 1 |
| Noradrenaline_byDBH_and_SLC18A2_ADRA2C | | 1 | 1 | 1 | 1 |
| Noradrenaline_byDBH_and_SLC6A2_ADRA2C | | 1 | 1 | 1 | 1 |
| Adrenaline_byPNMT_and_SLC18A2_ADRB1 | | 1 | 1 | 1 | 1 |
| Epinephrine_byPNMT_ADRB1 | | 1 | 1 | 1 | 1 |
| Noradrenaline_byDBH_and_SLC18A2_ADRB1 | | 1 | 1 | 1 | 1 |
| Noradrenaline_byDBH_and_SLC6A2_ADRB1 | | 1 | 1 | 1 | 1 |
| Adrenaline_byPNMT_and_SLC18A2_ADRB2 | | 1 | 1 | 1 | 1 |
| Epinephrine_byPNMT_ADRB2 | | 1 | 1 | 1 | 1 |
| Noradrenaline_byDBH_and_SLC18A2_ADRB2 | | 1 | 1 | 1 | 1 |
| Noradrenaline_byDBH_and_SLC6A2_ADRB2 | | 1 | 1 | 1 | 1 |
| ADM_RAMP3_complex | | 1 | 1 | 1 | 1 |
| ADM2_RAMP3_complex | | 1 | 1 | 1 | 1 |
| ADM_RAMP3 | | 1 | 1 | 1 | 1 |
| ADM2_RAMP2_complex | | 1 | 1 | 1 | 1 |
| AGRP_MC2R | | 1 | 1 | 1 | 1 |
| POMC_MC2R | | 1 | 1 | 1 | 1 |
| AGRP_MC4R | | 1 | 1 | 1 | 1 |
| POMC_MC4R | | 1 | 1 | 1 | 1 |
| AGRP_MC5R | | 1 | 1 | 1 | 1 |
| POMC_MC5R | | 1 | 1 | 1 | 1 |
| ASIP_MC1R | | 1 | 1 | 1 | 1 |
| POMC_MC1R | | 1 | 1 | 1 | 1 |
| AGRN_LRP4_MUSK_complex | | 1 | 1 | 1 | 1 |
| AGRN_PTPRS | | 1 | 1 | 1 | 1 |
| LRRC4B_PTPRS | | 1 | 1 | 1 | 1 |
| LRFN4_PTPRS | | 1 | 1 | 1 | 1 |
| LRFN5_PTPRS | | 1 | 1 | 1 | 1 |
| LRRTM4_PTPRS | | 1 | 1 | 1 | 1 |
| SLITRK1_PTPRS | | 1 | 1 | 1 | 1 |
| SLITRK5_PTPRS | | 1 | 1 | 1 | 1 |
| SLITRK6_PTPRS | | 1 | 1 | 1 | 1 |
| IAPP_CALCR | | 1 | 1 | 1 | 1 |
| CALCA_CALCR | | 1 | 1 | 1 | 1 |
| CALCB_CALCR | | 1 | 1 | 1 | 1 |
| IAPP_AMY1_receptor | | 1 | 1 | 1 | 1 |
| IAPP_AMY2_receptor | | 1 | 1 | 1 | 1 |
| IAPP_AMY3_receptor | | 1 | 1 | 1 | 1 |
| APP_CD74 | | 1 | 1 | 0 | 1 |
| APP_FPR2 | | 1 | 1 | 1 | 1 |
| ANXA1_FPR2 | | 1 | 1 | 1 | 1 |
| CCL23_FPR2 | | 1 | 1 | 1 | 1 |
| LipoxinA4_byALOX12_FPR2 | | 1 | 1 | 1 | 1 |
| LipoxinA4_byALOX5_FPR2 | | 1 | 1 | 1 | 1 |
| TAFA5_FPR2 | | 1 | 1 | 1 | 1 |
| SAA1_FPR2 | | 1 | 1 | 1 | 1 |
| APP_PLXNA4 | | 1 | 1 | 1 | 1 |
| APLP2_PLXNA4 | | 1 | 1 | 1 | 1 |
| APP_SORL1 | | 1 | 1 | 0 | 0 |
| APP_TNFRSF21 | | 1 | 1 | 1 | 1 |
| PI16_TNFRSF21 | | 1 | 1 | 1 | 1 |
| APP_TREM2_receptor | | 1 | 1 | 1 | 1 |
| APOA1_TREM2_receptor | | 1 | 1 | 1 | 1 |
| APOA2_TREM2_receptor | | 1 | 1 | 1 | 1 |
| APOB_TREM2_receptor | | 1 | 1 | 1 | 1 |
| APOE_TREM2_receptor | | 1 | 1 | 1 | 1 |
| CLU_TREM2_receptor | | 1 | 1 | 1 | 1 |
| APLP2_PIGR | | 1 | 1 | 1 | 1 |
| Desoxycorticosterone_byCYP21A2_NR3C2 | | 1 | 1 | 1 | 1 |
| Dihydrotestosterone_bySRD5A1_AR | | 1 | 1 | 1 | 1 |
| Dihydrotestosterone_bySRD5A2_AR | | 1 | 1 | 1 | 1 |
| Dihydrotestosterone_bySRD5A3_AR | | 1 | 1 | 1 | 1 |
| Androstenedione_byCYP17A1_AR | | 1 | 1 | 1 | 1 |
| Testosterone_byHSD17B12_AR | | 1 | 1 | 1 | 1 |
| Testosterone_byHSD17B3_AR | | 1 | 1 | 1 | 1 |
| Testosterone_byAKR1D1_AR | | 1 | 1 | 1 | 1 |
| Androsterone_byHSD17B6_NR1H4 | | 1 | 1 | 1 | 1 |
| 22Hydroxycholesterol_byCYP11A1_NR1H4 | | 1 | 1 | 1 | 1 |
| 22Hydroxycholesterol_byCYP3A4_NR1H4 | | 1 | 1 | 1 | 1 |
| Calcitriol_byCYP27B1_VDR | | 1 | 1 | 1 | 1 |
| Estradiol_byCYP19A1_ESR1 | | 1 | 1 | 1 | 1 |
| Dehydroepiandrosterone_bySTS_ESR1 | | 1 | 1 | 1 | 1 |
| Estradiol_byHSD17B1_ESR1 | | 1 | 1 | 1 | 1 |
| Estradiol_byCYP19A1_ESR2 | | 1 | 1 | 1 | 1 |
| Estradiol_byHSD17B1_ESR2 | | 1 | 1 | 1 | 1 |
| Estradiol_byCYP19A1_GPER1 | | 1 | 1 | 1 | 1 |
| Estradiol_byHSD17B1_GPER1 | | 1 | 1 | 1 | 1 |
| Estradiol_byCYP19A1_NR1I2 | | 1 | 1 | 1 | 1 |
| Pregnenolone_byCYP11A1_NR1I2 | | 1 | 1 | 1 | 1 |
| Dehydroepiandrosterone_bySTS_NR1I2 | | 1 | 1 | 1 | 1 |
| Estradiol_byHSD17B1_NR1I2 | | 1 | 1 | 1 | 1 |
| ANGPT1_TEK | | 1 | 1 | 1 | 1 |
| ANGPT2_TEK | | 1 | 1 | 1 | 1 |
| ANGPT4_TEK | | 1 | 1 | 1 | 1 |
| AGT_AGTR1 | | 1 | 1 | 1 | 1 |
| AGT_AGTR2 | | 1 | 1 | 1 | 1 |
| ANXA1_FPR1 | | 1 | 1 | 1 | 1 |
| CTSG_FPR1 | | 1 | 1 | 1 | 1 |
| TAFA4_FPR1 | | 1 | 1 | 1 | 1 |
| ANXA1_FPR3 | | 1 | 1 | 1 | 1 |
| HEBP1_FPR3 | | 1 | 1 | 1 | 1 |
| APELA_APLNR | | 1 | 1 | 1 | 1 |
| APLN_APLNR | | 1 | 1 | 1 | 1 |
| APOA1_ABCA1 | | 1 | 1 | 1 | 1 |
| APOA1_CUBN_AMN_complex | | 1 | 1 | 1 | 1 |
| APOB_APOBR | | 1 | 1 | 1 | 1 |
| 2arachidonoylglycerol_byDAGLA_CNR1 | | 1 | 1 | 1 | 1 |
| 2arachidonoylglycerol_byDAGLB_CNR1 | | 1 | 1 | 1 | 1 |
| 2arachidonoylglycerol_byDAGLA_CNR2 | | 1 | 1 | 1 | 1 |
| 2arachidonoylglycerol_byDAGLB_CNR2 | | 1 | 1 | 1 | 1 |
| 2arachidonoylglycerol_byDAGLA_GPR55 | | 1 | 1 | 1 | 1 |
| 2arachidonoylglycerol_byDAGLB_GPR55 | | 1 | 1 | 1 | 1 |
| NGF_NGFR | | 1 | 1 | 1 | 1 |
| BDNF_NGFR | | 1 | 1 | 1 | 1 |
| NTF3_NGFR | | 1 | 1 | 1 | 1 |
| CD80_NGFR | | 1 | 1 | 1 | 1 |
| NGF_NTRK1 | | 1 | 1 | 1 | 1 |
| NTF3_NTRK1 | | 1 | 1 | 1 | 1 |
| NGF_SORT1 | | 1 | 1 | 1 | 1 |
| BDNF_SORT1 | | 1 | 1 | 1 | 1 |
| NTS_SORT1 | | 1 | 1 | 1 | 1 |
| LRPAP1_SORT1 | | 1 | 1 | 1 | 1 |
| BMP10_ACVL1_ACVR2A | | 1 | 1 | 1 | 1 |
| BMP10_ACVL1_BMPR2 | | 1 | 1 | 1 | 1 |
| BMP2_BMPR1B_BMPR2 | | 1 | 1 | 1 | 1 |
| BMP4_BMPR1B_BMPR2 | | 1 | 1 | 1 | 1 |
| BMP6_BMPR1B_BMPR2 | | 1 | 1 | 1 | 1 |
| BMP7_BMPR1B_BMPR2 | | 1 | 1 | 1 | 1 |
| BMP8A_BMPR1B_BMPR2 | | 1 | 1 | 1 | 1 |
| GDF5_BMPR1B_BMPR2 | | 1 | 1 | 1 | 1 |
| GDF6_BMPR1B_BMPR2 | | 1 | 1 | 1 | 1 |
| GDF7_BMPR1B_BMPR2 | | 1 | 1 | 1 | 1 |
| BMP2_BMR1A_ACR2A | | 1 | 1 | 1 | 1 |
| BMP4_BMR1A_ACR2A | | 1 | 1 | 1 | 1 |
| BMP6_BMR1A_ACR2A | | 1 | 1 | 1 | 1 |
| BMP7_BMR1A_ACR2A | | 1 | 1 | 1 | 1 |
| BMP8A_BMR1A_ACR2A | | 1 | 1 | 1 | 1 |
| GDF5_BMR1A_ACR2A | | 1 | 1 | 1 | 1 |
| GDF6_BMR1A_ACR2A | | 1 | 1 | 1 | 1 |
| GDF7_BMR1A_ACR2A | | 1 | 1 | 1 | 1 |
| BMP2_BMR1B_AVR2A | | 1 | 1 | 1 | 1 |
| BMP4_BMR1B_AVR2A | | 1 | 1 | 1 | 1 |
| BMP6_BMR1B_AVR2A | | 1 | 1 | 1 | 1 |
| BMP7_BMR1B_AVR2A | | 1 | 1 | 1 | 1 |
| BMP8A_BMR1B_AVR2A | | 1 | 1 | 1 | 1 |
| GDF5_BMR1B_AVR2A | | 1 | 1 | 1 | 1 |
| GDF6_BMR1B_AVR2A | | 1 | 1 | 1 | 1 |
| GDF7_BMR1B_AVR2A | | 1 | 1 | 1 | 1 |
| BMP2_BMR1A_AVR2B | | 1 | 1 | 1 | 1 |
| BMP4_BMR1A_AVR2B | | 1 | 1 | 1 | 1 |
| BMP6_BMR1A_AVR2B | | 1 | 1 | 1 | 1 |
| BMP7_BMR1A_AVR2B | | 1 | 1 | 1 | 1 |
| BMP8A_BMR1A_AVR2B | | 1 | 1 | 1 | 1 |
| GDF5_BMR1A_AVR2B | | 1 | 1 | 1 | 1 |
| GDF7_BMR1A_AVR2B | | 1 | 1 | 1 | 1 |
| BMP2_BMR1B_AVR2B | | 1 | 1 | 1 | 1 |
| BMP4_BMR1B_AVR2B | | 1 | 1 | 1 | 1 |
| BMP6_BMR1B_AVR2B | | 1 | 1 | 1 | 1 |
| BMP7_BMR1B_AVR2B | | 1 | 1 | 1 | 1 |
| BMP8A_BMR1B_AVR2B | | 1 | 1 | 1 | 1 |
| GDF5_BMR1B_AVR2B | | 1 | 1 | 1 | 1 |
| GDF6_BMR1B_AVR2B | | 1 | 1 | 1 | 1 |
| GDF7_BMR1B_AVR2B | | 1 | 1 | 1 | 1 |
| BMP2_BMPR1A_BMPR2 | | 1 | 1 | 1 | 1 |
| BMP4_BMPR1A_BMPR2 | | 1 | 1 | 1 | 1 |
| BMP6_BMPR1A_BMPR2 | | 1 | 1 | 1 | 1 |
| BMP7_BMPR1A_BMPR2 | | 1 | 1 | 1 | 1 |
| BMP8A_BMPR1A_BMPR2 | | 1 | 1 | 1 | 1 |
| GDF6_BMPR1A_BMPR2 | | 1 | 1 | 1 | 1 |
| GDF7_BMPR1A_BMPR2 | | 1 | 1 | 1 | 1 |
| BMP6_ACVR_1A2A_receptor | | 1 | 1 | 1 | 1 |
| BMP7_ACVR_1A2A_receptor | | 1 | 1 | 1 | 1 |
| BMP8A_ACVR_1A2A_receptor | | 1 | 1 | 1 | 1 |
| Activin_ligand_ab_ACVR_1A2A_receptor | | 1 | 1 | 1 | 1 |
| INHA_ACVR_1A2A_receptor | | 1 | 1 | 1 | 1 |
| Inhibin_ligand_A_ACVR_1A2A_receptor | | 1 | 1 | 1 | 1 |
| Inhibin_ligand_B_ACVR_1A2A_receptor | | 1 | 1 | 1 | 1 |
| BMP6_ACVR_1A2B_receptor | | 1 | 1 | 1 | 1 |
| BMP7_ACVR_1A2B_receptor | | 1 | 1 | 1 | 1 |
| BMP8A_ACVR_1A2B_receptor | | 1 | 1 | 1 | 1 |
| Activin_ligand_ab_ACVR_1A2B_receptor | | 1 | 1 | 1 | 1 |
| INHA_ACVR_1A2B_receptor | | 1 | 1 | 1 | 1 |
| Inhibin_ligand_A_ACVR_1A2B_receptor | | 1 | 1 | 1 | 1 |
| Inhibin_ligand_B_ACVR_1A2B_receptor | | 1 | 1 | 1 | 1 |
| BMP6_ACVR1_BMPR2 | | 1 | 1 | 1 | 1 |
| BMP7_ACVR1_BMPR2 | | 1 | 1 | 1 | 1 |
| BMP8A_ACVR1_BMPR2 | | 1 | 1 | 1 | 1 |
| BMPR1B_BMPR2_BMPR1A | | 1 | 1 | 1 | 1 |
| BDNF_NTRK2 | | 1 | 1 | 1 | 1 |
| NTN4_NTRK2 | | 1 | 1 | 1 | 1 |
| NTF3_NTRK2 | | 1 | 1 | 1 | 1 |
| CALCA_RAMP1_complex | | 1 | 1 | 1 | 1 |
| CALCB_RAMP1_complex | | 1 | 1 | 1 | 1 |
| CLSTN1_NRXN1 | | 1 | 1 | 1 | 1 |
| CLSTN2_NRXN1 | | 1 | 1 | 1 | 1 |
| CLSTN3_NRXN1 | | 1 | 1 | 1 | 1 |
| LRRTM2_NRXN1 | | 1 | 1 | 1 | 1 |
| LRRTM3_NRXN1 | | 1 | 1 | 1 | 1 |
| LRRTM4_NRXN1 | | 1 | 1 | 1 | 1 |
| NLGN1_NRXN1 | | 1 | 1 | 1 | 1 |
| NLGN2_NRXN1 | | 1 | 1 | 1 | 1 |
| NLGN3_NRXN1 | | 1 | 1 | 1 | 1 |
| NLGN4X_NRXN1 | | 1 | 1 | 1 | 1 |
| NLGN4Y_NRXN1 | | 1 | 1 | 1 | 1 |
| CLSTN1_NRXN2 | | 1 | 1 | 1 | 1 |
| CLSTN2_NRXN2 | | 1 | 1 | 1 | 1 |
| CLSTN3_NRXN2 | | 1 | 1 | 1 | 1 |
| LRRTM2_NRXN2 | | 1 | 1 | 1 | 1 |
| LRRTM3_NRXN2 | | 1 | 1 | 1 | 1 |
| LRRTM4_NRXN2 | | 1 | 1 | 1 | 1 |
| NLGN1_NRXN2 | | 1 | 1 | 1 | 1 |
| NLGN2_NRXN2 | | 1 | 1 | 1 | 1 |
| NLGN3_NRXN2 | | 1 | 1 | 1 | 1 |
| NLGN4X_NRXN2 | | 1 | 1 | 1 | 1 |
| NLGN4Y_NRXN2 | | 1 | 1 | 1 | 1 |
| CCL16_CCR8 | | 1 | 1 | 1 | 1 |
| CCL18_CCR8 | | 1 | 1 | 1 | 1 |
| CCL13_ACKR2 | | 1 | 1 | 1 | 1 |
| CCL14_ACKR2 | | 1 | 1 | 1 | 1 |
| CCL2_ACKR2 | | 1 | 1 | 1 | 1 |
| CCL3_ACKR2 | | 1 | 1 | 1 | 1 |
| CCL4_ACKR2 | | 1 | 1 | 1 | 1 |
| CCL5_ACKR2 | | 1 | 1 | 1 | 1 |
| CCL8_ACKR2 | | 1 | 1 | 1 | 1 |
| CCL13_CCR3 | | 1 | 1 | 1 | 1 |
| CCL14_CCR3 | | 1 | 1 | 1 | 1 |
| CCL15_CCR3 | | 1 | 1 | 1 | 1 |
| CCL24_CCR3 | | 1 | 1 | 1 | 1 |
| CCL26_CCR3 | | 1 | 1 | 1 | 1 |
| CCL3_CCR3 | | 1 | 1 | 1 | 1 |
| CCL3L1_CCR3 | | 1 | 1 | 1 | 1 |
| CCL5_CCR3 | | 1 | 1 | 1 | 1 |
| CCL8_CCR3 | | 1 | 1 | 1 | 1 |
| CCL22_DPP4 | | 1 | 1 | 1 | 1 |
| CXCL10_DPP4 | | 1 | 1 | 1 | 1 |
| CXCL11_DPP4 | | 1 | 1 | 1 | 1 |
| CXCL12_DPP4 | | 1 | 1 | 1 | 1 |
| CXCL2_DPP4 | | 1 | 1 | 0 | 0 |
| CXCL9_DPP4 | | 1 | 1 | 1 | 1 |
| CCL13_CCR2 | | 1 | 1 | 1 | 1 |
| CCL16_CCR2 | | 1 | 1 | 1 | 1 |
| CCL2_CCR2 | | 1 | 1 | 1 | 1 |
| CCL26_CCR2 | | 1 | 1 | 1 | 1 |
| CCL8_CCR2 | | 1 | 1 | 1 | 1 |
| CCL14_CCR1 | | 1 | 1 | 1 | 1 |
| CCL15_CCR1 | | 1 | 1 | 1 | 1 |
| CCL16_CCR1 | | 1 | 1 | 1 | 1 |
| CCL23_CCR1 | | 1 | 1 | 1 | 1 |
| CCL26_CCR1 | | 1 | 1 | 1 | 1 |
| CCL3_CCR1 | | 1 | 1 | 1 | 1 |
| CCL3L1_CCR1 | | 1 | 1 | 1 | 1 |
| CCL5_CCR1 | | 1 | 1 | 1 | 1 |
| CCL8_CCR1 | | 1 | 1 | 1 | 1 |
| CCL16_HRH4 | | 1 | 1 | 1 | 1 |
| Histamine_byHDC_HRH4 | | 1 | 1 | 1 | 1 |
| CCL17_CCR4 | | 1 | 1 | 1 | 1 |
| CCL22_CCR4 | | 1 | 1 | 1 | 1 |
| CCL5_CCR4 | | 1 | 1 | 1 | 1 |
| CCL19_ACKR4 | | 1 | 1 | 1 | 1 |
| CCL25_ACKR4 | | 1 | 1 | 1 | 1 |
| CXCL13_ACKR4 | | 1 | 1 | 1 | 1 |
| CCL19_CCR7 | | 1 | 1 | 1 | 1 |
| CCL19_CCRL2 | | 1 | 1 | 1 | 1 |
| RARRES2_CCRL2 | | 1 | 1 | 1 | 1 |
| CCL2_ACKR1 | | 1 | 1 | 1 | 1 |
| CCL5_ACKR1 | | 1 | 1 | 1 | 1 |
| CXCL1_ACKR1 | | 1 | 1 | 1 | 1 |
| CXCL8_ACKR1 | | 1 | 1 | 1 | 1 |
| CCL20_CCR6 | | 1 | 1 | 0 | 0 |
| CCL25_CCR9 | | 1 | 1 | 1 | 1 |
| CCL27_CCR10 | | 1 | 1 | 1 | 1 |
| CCL28_CCR10 | | 1 | 1 | 1 | 1 |
| CCL3_CCR5 | | 1 | 1 | 1 | 1 |
| CCL4_CCR5 | | 1 | 1 | 1 | 1 |
| CCL5_CCR5 | | 1 | 1 | 1 | 1 |
| CCL8_CCR5 | | 1 | 1 | 1 | 1 |
| CCL5_GPR75 | | 1 | 1 | 1 | 1 |
| CXCL1_CXCR1 | | 1 | 1 | 1 | 1 |
| CXCL5_CXCR1 | | 1 | 1 | 1 | 1 |
| CXCL6_CXCR1 | | 1 | 1 | 1 | 1 |
| CXCL8_CXCR1 | | 1 | 1 | 1 | 1 |
| CXCL1_CXCR2 | | 1 | 1 | 1 | 1 |
| CXCL2_CXCR2 | | 1 | 1 | 1 | 1 |
| CXCL3_CXCR2 | | 1 | 1 | 1 | 1 |
| CXCL5_CXCR2 | | 1 | 1 | 1 | 1 |
| CXCL6_CXCR2 | | 1 | 1 | 1 | 1 |
| CXCL8_CXCR2 | | 1 | 1 | 1 | 1 |
| CX3CL1_CX3CR1 | | 1 | 1 | 1 | 1 |
| CXCL10_CXCR3 | | 1 | 1 | 1 | 1 |
| CXCL11_CXCR3 | | 1 | 1 | 1 | 1 |
| CXCL9_CXCR3 | | 1 | 1 | 1 | 1 |
| PF4_CXCR3 | | 1 | 1 | 1 | 1 |
| CXCL11_ACKR3 | | 1 | 1 | 1 | 1 |
| CXCL12_CXCR4 | | 1 | 1 | 0 | 0 |
| CXCL14_CXCR4 | | 1 | 1 | 1 | 1 |
| CXCL13_CXCR5 | | 1 | 1 | 1 | 1 |
| CXCL16_CXCR6 | | 1 | 1 | 0 | 0 |
| CCK_CCKBR | | 1 | 1 | 1 | 1 |
| GAST_CCKBR | | 1 | 1 | 1 | 1 |
| Cholesterol_byCEL_RORA | | 1 | 1 | 1 | 1 |
| Cholesterol_byLIPA_RORA | | 1 | 1 | 0 | 0 |
| Cholesterol_byDHCR24_RORA | | 1 | 1 | 0 | 0 |
| Cholesterol_byDHCR7_RORA | | 1 | 1 | 0 | 0 |
| Cholesterol_byCEL_RORC | | 1 | 1 | 1 | 1 |
| Cholesterol_byLIPA_RORC | | 0 | 1 | 1 | 1 |
| Cholesterol_byDHCR24_RORC | | 1 | 1 | 0.205776 | 1 |
| Cholesterol_byDHCR7_RORC | | 1 | 0 | 1 | 1 |
| Desmosterol_byDHCR7_NR1H2 | | 1 | 0 | 1 | 0 |
| Desmosterol_byDHCR7_NR1H3 | | 1 | 0 | 1 | 1 |
| hCGB7_complex_LHCGR | | 1 | 1 | 1 | 1 |
| glyco_Lutropin_LHCGR | | 1 | 1 | 1 | 1 |
| LHB_LHCGR | | 1 | 1 | 1 | 1 |
| Thyrostimulin_TSHR | | 1 | 1 | 1 | 1 |
| C1QL1_ADGRB3 | | 1 | 1 | 1 | 1 |
| C1QL3_ADGRB3 | | 1 | 1 | 1 | 1 |
| C1QL4_ADGRB3 | | 1 | 1 | 1 | 1 |
| C3_C3AR1 | | 1 | 1 | 1 | 1 |
| C3_C5AR2 | | 1 | 1 | 1 | 1 |
| C4A_C5AR2 | | 1 | 1 | 1 | 1 |
| C5_C5AR2 | | 1 | 1 | 1 | 1 |
| C5_C5AR1 | | 1 | 1 | 1 | 1 |
| CRH_CRHR2 | | 1 | 1 | 1 | 1 |
| UCN_CRHR2 | | 1 | 1 | 1 | 1 |
| UCN2_CRHR2 | | 1 | 1 | 1 | 1 |
| CSF1_CSF1R | | 1 | 1 | 1 | 1 |
| IL34_CSF1R | | 1 | 1 | 1 | 1 |
| CSF2_GMCSFR | | 1 | 1 | 1 | 1 |
| DHEAsulfate_bySULT2B_PPARA | | 1 | 1 | 1 | 1 |
| DHEAsulfate_bySULT1E1_PPARA | | 1 | 1 | 1 | 1 |
| DHEAsulfate_bySULT2A1_PPARA | | 1 | 1 | 1 | 1 |
| Dehydroepiandrosterone_bySTS_PPARA | | 1 | 1 | 1 | 1 |
| DHEAsulfate_bySULT2B_PPARD | | 1 | 1 | 1 | 1 |
| DHEAsulfate_bySULT1E1_PPARD | | 1 | 1 | 1 | 1 |
| DHEAsulfate_bySULT2A1_PPARD | | 1 | 1 | 1 | 1 |
| DHEAsulfate_bySULT2B_PPARG | | 1 | 1 | 1 | 1 |
| DHEAsulfate_bySULT1E1_PPARG | | 1 | 1 | 1 | 1 |
| DHEAsulfate_bySULT2A1_PPARG | | 1 | 1 | 1 | 1 |
| DHH_PTCH_BOC_transmembrane_receptor | | 1 | 1 | 1 | 1 |
| IHH_PTCH_BOC_transmembrane_receptor | | 1 | 1 | 1 | 1 |
| SHH_PTCH_BOC_transmembrane_receptor | | 1 | 1 | 1 | 1 |
| DHH_PTCH_CDON_transmembrane_receptor | | 1 | 1 | 1 | 1 |
| IHH_PTCH_CDON_transmembrane_receptor | | 1 | 1 | 1 | 1 |
| SHH_PTCH_CDON_transmembrane_receptor | | 1 | 1 | 1 | 1 |
| DHH_PTCH_GAS1_transmembrane_receptor | | 1 | 1 | 1 | 1 |
| IHH_PTCH_GAS1_transmembrane_receptor | | 1 | 1 | 1 | 1 |
| SHH_PTCH_GAS1_transmembrane_receptor | | 1 | 1 | 1 | 1 |
| DHH_HHIP | | 1 | 1 | 1 | 1 |
| IHH_HHIP | | 1 | 1 | 1 | 1 |
| SHH_HHIP | | 1 | 1 | 1 | 1 |
| 5alphaDihydroprogesterone_byDHRS9_PGR | | 1 | 1 | 1 | 1 |
| Progesterone_byHSD3B1_PGR | | 1 | 1 | 1 | 1 |
| Ldopa_byTYR_GPR143 | | 1 | 1 | 1 | 1 |
| EDN1_EDNRA | | 1 | 1 | 1 | 1 |
| EDN2_EDNRA | | 1 | 1 | 1 | 1 |
| EDN3_EDNRA | | 1 | 1 | 1 | 1 |
| EDN1_EDNRB | | 1 | 1 | 1 | 1 |
| EDN2_EDNRB | | 1 | 1 | 1 | 1 |
| EDN3_EDNRB | | 1 | 1 | 1 | 1 |
| EFNA1_EPHA1 | | 1 | 1 | 1 | 1 |
| EFNA2_EPHA1 | | 1 | 1 | 1 | 1 |
| EFNA3_EPHA1 | | 1 | 1 | 1 | 1 |
| EFNA4_EPHA1 | | 1 | 1 | 1 | 1 |
| EFNA5_EPHA1 | | 1 | 1 | 1 | 1 |
| EFNA1_EPHA2 | | 1 | 1 | 1 | 1 |
| EFNA2_EPHA2 | | 1 | 1 | 1 | 1 |
| EFNA3_EPHA2 | | 1 | 1 | 1 | 1 |
| EFNA4_EPHA2 | | 1 | 1 | 1 | 1 |
| EFNA5_EPHA2 | | 1 | 1 | 1 | 1 |
| EFNB1_EPHA2 | | 1 | 1 | 1 | 1 |
| EFNA1_EPHA3 | | 1 | 1 | 1 | 1 |
| EFNA2_EPHA3 | | 1 | 1 | 1 | 1 |
| EFNA3_EPHA3 | | 1 | 1 | 1 | 1 |
| EFNA4_EPHA3 | | 1 | 1 | 1 | 1 |
| EFNA5_EPHA3 | | 1 | 1 | 1 | 1 |
| EFNA1_EPHA4 | | 1 | 1 | 1 | 1 |
| EFNA2_EPHA4 | | 1 | 1 | 1 | 1 |
| EFNA3_EPHA4 | | 1 | 1 | 1 | 1 |
| EFNA4_EPHA4 | | 1 | 1 | 1 | 1 |
| EFNA5_EPHA4 | | 1 | 1 | 1 | 1 |
| EFNB1_EPHA4 | | 1 | 1 | 1 | 1 |
| EFNB2_EPHA4 | | 1 | 1 | 1 | 1 |
| EFNB3_EPHA4 | | 1 | 1 | 1 | 1 |
| EFNA1_EPHA5 | | 1 | 1 | 1 | 1 |
| EFNA2_EPHA5 | | 1 | 1 | 1 | 1 |
| EFNA3_EPHA5 | | 1 | 1 | 1 | 1 |
| EFNA4_EPHA5 | | 1 | 1 | 1 | 1 |
| EFNA5_EPHA5 | | 1 | 1 | 1 | 1 |
| EFNA1_EPHA7 | | 1 | 1 | 1 | 1 |
| EFNA2_EPHA7 | | 1 | 1 | 1 | 1 |
| EFNA3_EPHA7 | | 1 | 1 | 1 | 1 |
| EFNA4_EPHA7 | | 1 | 1 | 1 | 1 |
| EFNA5_EPHA7 | | 1 | 1 | 1 | 1 |
| EFNA5_EPHB2 | | 1 | 1 | 1 | 1 |
| EFNB1_EPHB2 | | 1 | 1 | 1 | 1 |
| EFNB2_EPHB2 | | 1 | 1 | 1 | 1 |
| EFNB3_EPHB2 | | 1 | 1 | 1 | 1 |
| EFNB1_EPHB1 | | 1 | 1 | 1 | 1 |
| EFNB2_EPHB1 | | 1 | 1 | 1 | 1 |
| EFNB3_EPHB1 | | 1 | 1 | 1 | 1 |
| EFNB1_EPHB3 | | 1 | 1 | 1 | 1 |
| EFNB2_EPHB3 | | 1 | 1 | 1 | 1 |
| EFNB3_EPHB3 | | 1 | 1 | 1 | 1 |
| EFNB1_EPHB4 | | 1 | 1 | 1 | 1 |
| EFNB2_EPHB4 | | 1 | 1 | 1 | 1 |
| EFNB3_EPHB4 | | 1 | 1 | 1 | 1 |
| EFNB1_EPHB6 | | 1 | 1 | 1 | 1 |
| EFNB2_EPHB6 | | 1 | 1 | 1 | 1 |
| EFNB3_EPHB6 | | 1 | 1 | 1 | 1 |
| AREG_EGFR | | 0 | 0 | 1 | 1 |
| BTC_EGFR | | 1 | 1 | 1 | 1 |
| EGF_EGFR | | 1 | 1 | 1 | 1 |
| EPGN_EGFR | | 1 | 1 | 1 | 1 |
| EREG_EGFR | | 1 | 1 | 1 | 1 |
| HBEGF_EGFR | | 1 | 1 | 1 | 1 |
| TGFA_EGFR | | 1 | 1 | 1 | 1 |
| BTC_ERBB3 | | 1 | 1 | 1 | 1 |
| NRG1_ERBB3 | | 1 | 1 | 1 | 1 |
| NRG2_ERBB3 | | 1 | 1 | 1 | 1 |
| BTC_ERBB4 | | 1 | 1 | 1 | 1 |
| EREG_ERBB4 | | 1 | 1 | 1 | 1 |
| HBEGF_ERBB4 | | 1 | 1 | 1 | 1 |
| NRG1_ERBB4 | | 1 | 1 | 1 | 1 |
| NRG2_ERBB4 | | 1 | 1 | 1 | 1 |
| NRG3_ERBB4 | | 1 | 1 | 1 | 1 |
| NRG4_ERBB4 | | 1 | 1 | 1 | 1 |
| HBEGF_ERBB2 | | 1 | 1 | 1 | 1 |
| FCER2_CR2 | | 1 | 1 | 1 | 1 |
| FCER2_FGFR2 | | 1 | 1 | 1 | 1 |
| FGF1_FGFR2 | | 1 | 1 | 1 | 1 |
| FGF10_FGFR2 | | 1 | 1 | 1 | 1 |
| FGF2_FGFR2 | | 1 | 1 | 1 | 1 |
| FGF22_FGFR2 | | 1 | 1 | 1 | 1 |
| FGF3_FGFR2 | | 1 | 1 | 1 | 1 |
| FGF7_FGFR2 | | 1 | 1 | 1 | 1 |
| FGF1_FGFR1 | | 1 | 1 | 1 | 1 |
| FGF2_FGFR1 | | 1 | 1 | 1 | 1 |
| FGF4_FGFR1 | | 1 | 1 | 1 | 1 |
| FGF6_FGFR1 | | 1 | 1 | 1 | 1 |
| NCAM1_FGFR1 | | 1 | 1 | 1 | 1 |
| FGF1_FGFR3 | | 1 | 1 | 1 | 1 |
| FGF17_FGFR3 | | 1 | 1 | 1 | 1 |
| FGF2_FGFR3 | | 1 | 1 | 1 | 1 |
| FGF20_FGFR3 | | 1 | 1 | 1 | 1 |
| FGF8_FGFR3 | | 1 | 1 | 1 | 1 |
| FGF9_FGFR3 | | 1 | 1 | 1 | 1 |
| FGF1_FGFR4 | | 1 | 1 | 1 | 1 |
| FGF2_FGFR4 | | 1 | 1 | 1 | 1 |
| SDC2_FGFR4 | | 1 | 1 | 1 | 1 |
| FGF19_BetaKlotho_FGFR4 | | 1 | 1 | 1 | 1 |
| FGF21_BetaKlotho_FGFR4 | | 1 | 1 | 1 | 1 |
| FGF23_Klotho_FGFR1 | | 1 | 1 | 1 | 1 |
| FGL1_LAG3 | | 1 | 1 | 0 | 0 |
| NCAM1_AGRN | | 1 | 1 | 1 | 1 |
| FLRT1_ADGRL1 | | 1 | 1 | 1 | 1 |
| TENM2_FLRT1_complex_ADGRL1 | | 1 | 1 | 1 | 1 |
| TENM4_FLRT1_complex_ADGRL1 | | 1 | 1 | 1 | 1 |
| FLRT2_ADGRL1 | | 1 | 1 | 1 | 1 |
| TENM2_FLRT3_complex_ADGRL1 | | 1 | 1 | 1 | 1 |
| TENM4_FLRT3_complex_ADGRL1 | | 1 | 1 | 1 | 1 |
| NRXN1_ADGRL1 | | 1 | 1 | 1 | 1 |
| NRXN2_ADGRL1 | | 1 | 1 | 1 | 1 |
| NRXN3_ADGRL1 | | 1 | 1 | 1 | 1 |
| TENM1_ADGRL1 | | 1 | 1 | 1 | 1 |
| TENM2_ADGRL1 | | 1 | 1 | 1 | 1 |
| TENM3_ADGRL1 | | 1 | 1 | 1 | 1 |
| TENM4_ADGRL1 | | 1 | 1 | 1 | 1 |
| FLRT1_ADGRL3 | | 1 | 1 | 1 | 1 |
| TENM3_FLRT1_complex_ADGRL3 | | 1 | 1 | 1 | 1 |
| FLRT2_ADGRL3 | | 1 | 1 | 1 | 1 |
| FLRT3_ADGRL3 | | 1 | 1 | 1 | 1 |
| TENM3_FLRT3_complex_ADGRL3 | | 1 | 1 | 1 | 1 |
| TENM1_ADGRL3 | | 1 | 1 | 1 | 1 |
| TENM2_ADGRL3 | | 1 | 1 | 1 | 1 |
| TENM3_ADGRL3 | | 1 | 1 | 1 | 1 |
| TENM4_ADGRL3 | | 1 | 1 | 1 | 1 |
| FLRT3_ADGRL2 | | 1 | 1 | 1 | 1 |
| TENM2_FLRT3_complex_ADGRL2 | | 1 | 1 | 1 | 1 |
| TENM1_ADGRL2 | | 1 | 1 | 1 | 1 |
| TENM2_ADGRL2 | | 1 | 1 | 1 | 1 |
| TENM3_ADGRL2 | | 1 | 1 | 1 | 1 |
| TENM4_ADGRL2 | | 1 | 1 | 1 | 1 |
| GABA_byGAD1_and_SLC6A1_GABBR1 | | 1 | 1 | 1 | 1 |
| GABA_byGAD1_and_SLC6A11_GABBR1 | | 1 | 1 | 1 | 1 |
| GABA_byGAD1_and_SLC6A12_GABBR1 | | 1 | 1 | 1 | 1 |
| GABA_byGAD1_and_SLC6A13_GABBR1 | | 1 | 1 | 1 | 1 |
| GABA_byGAD1_and_SLC6A6_GABBR1 | | 1 | 1 | 1 | 1 |
| GABA_byGAD1_and_SLC6A8_GABBR1 | | 1 | 1 | 1 | 1 |
| GABA_byGAD2_and_SLC6A1_GABBR1 | | 1 | 1 | 1 | 1 |
| GABA_byGAD2_and_SLC6A11_GABBR1 | | 1 | 1 | 1 | 1 |
| GABA_byGAD2_and_SLC6A12_GABBR1 | | 1 | 1 | 1 | 1 |
| GABA_byGAD2_and_SLC6A13_GABBR1 | | 1 | 1 | 1 | 1 |
| GABA_byGAD2_and_SLC6A6_GABBR1 | | 1 | 1 | 1 | 1 |
| GABA_byGAD2_and_SLC6A8_GABBR1 | | 1 | 1 | 1 | 1 |
| GABA_byGAD1_and_SLC6A1_GABBR2 | | 1 | 1 | 1 | 1 |
| GABA_byGAD1_and_SLC6A11_GABBR2 | | 1 | 1 | 1 | 1 |
| GABA_byGAD1_and_SLC6A12_GABBR2 | | 1 | 1 | 1 | 1 |
| GABA_byGAD1_and_SLC6A13_GABBR2 | | 1 | 1 | 1 | 1 |
| GABA_byGAD1_and_SLC6A6_GABBR2 | | 1 | 1 | 1 | 1 |
| GABA_byGAD1_and_SLC6A8_GABBR2 | | 1 | 1 | 1 | 1 |
| GABA_byGAD2_and_SLC6A1_GABBR2 | | 1 | 1 | 1 | 1 |
| GABA_byGAD2_and_SLC6A11_GABBR2 | | 1 | 1 | 1 | 1 |
| GABA_byGAD2_and_SLC6A12_GABBR2 | | 1 | 1 | 1 | 1 |
| GABA_byGAD2_and_SLC6A13_GABBR2 | | 1 | 1 | 1 | 1 |
| GABA_byGAD2_and_SLC6A6_GABBR2 | | 1 | 1 | 1 | 1 |
| GABA_byGAD2_and_SLC6A8_GABBR2 | | 1 | 1 | 1 | 1 |
| GABA_byGAD1_and_SLC6A1_GABA-A_a1b2_complex | | 1 | 1 | 1 | 1 |
| GABA_byGAD1_and_SLC6A11_GABA-A_a1b2_complex | | 1 | 1 | 1 | 1 |
| GABA_byGAD1_and_SLC6A12_GABA-A_a1b2_complex | | 1 | 1 | 1 | 1 |
| GABA_byGAD1_and_SLC6A13_GABA-A_a1b2_complex | | 1 | 1 | 1 | 1 |
| GABA_byGAD1_and_SLC6A6_GABA-A_a1b2_complex | | 1 | 1 | 1 | 1 |
| GABA_byGAD1_and_SLC6A8_GABA-A_a1b2_complex | | 1 | 1 | 1 | 1 |
| GABA_byGAD2_and_SLC6A1_GABA-A_a1b2_complex | | 1 | 1 | 1 | 1 |
| GABA_byGAD2_and_SLC6A11_GABA-A_a1b2_complex | | 1 | 1 | 1 | 1 |
| GABA_byGAD2_and_SLC6A12_GABA-A_a1b2_complex | | 1 | 1 | 1 | 1 |
| GABA_byGAD2_and_SLC6A13_GABA-A_a1b2_complex | | 1 | 1 | 1 | 1 |
| GABA_byGAD2_and_SLC6A6_GABA-A_a1b2_complex | | 1 | 1 | 1 | 1 |
| GABA_byGAD2_and_SLC6A8_GABA-A_a1b2_complex | | 1 | 1 | 1 | 1 |
| GABA_byGAD1_and_SLC6A1_GABA-A_a1b2d_complex | | 1 | 1 | 1 | 1 |
| GABA_byGAD1_and_SLC6A11_GABA-A_a1b2d_complex | | 1 | 1 | 1 | 1 |
| GABA_byGAD1_and_SLC6A12_GABA-A_a1b2d_complex | | 1 | 1 | 1 | 1 |
| GABA_byGAD1_and_SLC6A13_GABA-A_a1b2d_complex | | 1 | 1 | 1 | 1 |
| GABA_byGAD1_and_SLC6A6_GABA-A_a1b2d_complex | | 1 | 1 | 1 | 1 |
| GABA_byGAD1_and_SLC6A8_GABA-A_a1b2d_complex | | 1 | 1 | 1 | 1 |
| GABA_byGAD2_and_SLC6A1_GABA-A_a1b2d_complex | | 1 | 1 | 1 | 1 |
| GABA_byGAD2_and_SLC6A11_GABA-A_a1b2d_complex | | 1 | 1 | 1 | 1 |
| GABA_byGAD2_and_SLC6A12_GABA-A_a1b2d_complex | | 1 | 1 | 1 | 1 |
| GABA_byGAD2_and_SLC6A13_GABA-A_a1b2d_complex | | 1 | 1 | 1 | 1 |
| GABA_byGAD2_and_SLC6A6_GABA-A_a1b2d_complex | | 1 | 1 | 1 | 1 |
| GABA_byGAD2_and_SLC6A8_GABA-A_a1b2d_complex | | 1 | 1 | 1 | 1 |
| GABA_byGAD1_and_SLC6A1_GABA-A_a1b2g2S_complex | | 1 | 1 | 1 | 1 |
| GABA_byGAD1_and_SLC6A11_GABA-A_a1b2g2S_complex | | 1 | 1 | 1 | 1 |
| GABA_byGAD1_and_SLC6A12_GABA-A_a1b2g2S_complex | | 1 | 1 | 1 | 1 |
| GABA_byGAD1_and_SLC6A13_GABA-A_a1b2g2S_complex | | 1 | 1 | 1 | 1 |
| GABA_byGAD1_and_SLC6A6_GABA-A_a1b2g2S_complex | | 1 | 1 | 1 | 1 |
| GABA_byGAD1_and_SLC6A8_GABA-A_a1b2g2S_complex | | 1 | 1 | 1 | 1 |
| GABA_byGAD2_and_SLC6A1_GABA-A_a1b2g2S_complex | | 1 | 1 | 1 | 1 |
| GABA_byGAD2_and_SLC6A11_GABA-A_a1b2g2S_complex | | 1 | 1 | 1 | 1 |
| GABA_byGAD2_and_SLC6A12_GABA-A_a1b2g2S_complex | | 1 | 1 | 1 | 1 |
| GABA_byGAD2_and_SLC6A13_GABA-A_a1b2g2S_complex | | 1 | 1 | 1 | 1 |
| GABA_byGAD2_and_SLC6A6_GABA-A_a1b2g2S_complex | | 1 | 1 | 1 | 1 |
| GABA_byGAD2_and_SLC6A8_GABA-A_a1b2g2S_complex | | 1 | 1 | 1 | 1 |
| GABA_byGAD1_and_SLC6A1_GABA-A_a1b3_complex | | 1 | 1 | 1 | 1 |
| GABA_byGAD1_and_SLC6A11_GABA-A_a1b3_complex | | 1 | 1 | 1 | 1 |
| GABA_byGAD1_and_SLC6A12_GABA-A_a1b3_complex | | 1 | 1 | 1 | 1 |
| GABA_byGAD1_and_SLC6A13_GABA-A_a1b3_complex | | 1 | 1 | 1 | 1 |
| GABA_byGAD1_and_SLC6A6_GABA-A_a1b3_complex | | 1 | 1 | 1 | 1 |
| GABA_byGAD1_and_SLC6A8_GABA-A_a1b3_complex | | 1 | 1 | 1 | 1 |
| GABA_byGAD2_and_SLC6A1_GABA-A_a1b3_complex | | 1 | 1 | 1 | 1 |
| GABA_byGAD2_and_SLC6A11_GABA-A_a1b3_complex | | 1 | 1 | 1 | 1 |
| GABA_byGAD2_and_SLC6A12_GABA-A_a1b3_complex | | 1 | 1 | 1 | 1 |
| GABA_byGAD2_and_SLC6A13_GABA-A_a1b3_complex | | 1 | 1 | 1 | 1 |
| GABA_byGAD2_and_SLC6A6_GABA-A_a1b3_complex | | 1 | 1 | 1 | 1 |
| GABA_byGAD2_and_SLC6A8_GABA-A_a1b3_complex | | 1 | 1 | 1 | 1 |
| GABA_byGAD1_and_SLC6A1_GABA-A_a1b3g2S_complex | | 1 | 1 | 1 | 1 |
| GABA_byGAD1_and_SLC6A11_GABA-A_a1b3g2S_complex | | 1 | 1 | 1 | 1 |
| GABA_byGAD1_and_SLC6A12_GABA-A_a1b3g2S_complex | | 1 | 1 | 1 | 1 |
| GABA_byGAD1_and_SLC6A13_GABA-A_a1b3g2S_complex | | 1 | 1 | 1 | 1 |
| GABA_byGAD1_and_SLC6A6_GABA-A_a1b3g2S_complex | | 1 | 1 | 1 | 1 |
| GABA_byGAD1_and_SLC6A8_GABA-A_a1b3g2S_complex | | 1 | 1 | 1 | 1 |
| GABA_byGAD2_and_SLC6A1_GABA-A_a1b3g2S_complex | | 1 | 1 | 1 | 1 |
| GABA_byGAD2_and_SLC6A11_GABA-A_a1b3g2S_complex | | 1 | 1 | 1 | 1 |
| GABA_byGAD2_and_SLC6A12_GABA-A_a1b3g2S_complex | | 1 | 1 | 1 | 1 |
| GABA_byGAD2_and_SLC6A13_GABA-A_a1b3g2S_complex | | 1 | 1 | 1 | 1 |
| GABA_byGAD2_and_SLC6A6_GABA-A_a1b3g2S_complex | | 1 | 1 | 1 | 1 |
| GABA_byGAD2_and_SLC6A8_GABA-A_a1b3g2S_complex | | 1 | 1 | 1 | 1 |
| GABA_byGAD1_and_SLC6A1_GABA-A_a2b3g2S_complex | | 1 | 1 | 1 | 1 |
| GABA_byGAD1_and_SLC6A11_GABA-A_a2b3g2S_complex | | 1 | 1 | 1 | 1 |
| GABA_byGAD1_and_SLC6A12_GABA-A_a2b3g2S_complex | | 1 | 1 | 1 | 1 |
| GABA_byGAD1_and_SLC6A13_GABA-A_a2b3g2S_complex | | 1 | 1 | 1 | 1 |
| GABA_byGAD1_and_SLC6A6_GABA-A_a2b3g2S_complex | | 1 | 1 | 1 | 1 |
| GABA_byGAD1_and_SLC6A8_GABA-A_a2b3g2S_complex | | 1 | 1 | 1 | 1 |
| GABA_byGAD2_and_SLC6A1_GABA-A_a2b3g2S_complex | | 1 | 1 | 1 | 1 |
| GABA_byGAD2_and_SLC6A11_GABA-A_a2b3g2S_complex | | 1 | 1 | 1 | 1 |
| GABA_byGAD2_and_SLC6A12_GABA-A_a2b3g2S_complex | | 1 | 1 | 1 | 1 |
| GABA_byGAD2_and_SLC6A13_GABA-A_a2b3g2S_complex | | 1 | 1 | 1 | 1 |
| GABA_byGAD2_and_SLC6A6_GABA-A_a2b3g2S_complex | | 1 | 1 | 1 | 1 |
| GABA_byGAD2_and_SLC6A8_GABA-A_a2b3g2S_complex | | 1 | 1 | 1 | 1 |
| GABA_byGAD1_and_SLC6A1_GABA-A_a3b3e_complex | | 1 | 1 | 1 | 1 |
| GABA_byGAD1_and_SLC6A11_GABA-A_a3b3e_complex | | 1 | 1 | 1 | 1 |
| GABA_byGAD1_and_SLC6A12_GABA-A_a3b3e_complex | | 1 | 1 | 1 | 1 |
| GABA_byGAD1_and_SLC6A13_GABA-A_a3b3e_complex | | 1 | 1 | 1 | 1 |
| GABA_byGAD1_and_SLC6A6_GABA-A_a3b3e_complex | | 1 | 1 | 1 | 1 |
| GABA_byGAD1_and_SLC6A8_GABA-A_a3b3e_complex | | 1 | 1 | 1 | 1 |
| GABA_byGAD2_and_SLC6A1_GABA-A_a3b3e_complex | | 1 | 1 | 1 | 1 |
| GABA_byGAD2_and_SLC6A11_GABA-A_a3b3e_complex | | 1 | 1 | 1 | 1 |
| GABA_byGAD2_and_SLC6A12_GABA-A_a3b3e_complex | | 1 | 1 | 1 | 1 |
| GABA_byGAD2_and_SLC6A13_GABA-A_a3b3e_complex | | 1 | 1 | 1 | 1 |
| GABA_byGAD2_and_SLC6A6_GABA-A_a3b3e_complex | | 1 | 1 | 1 | 1 |
| GABA_byGAD2_and_SLC6A8_GABA-A_a3b3e_complex | | 1 | 1 | 1 | 1 |
| GABA_byGAD1_and_SLC6A1_GABA-A_a3b3g2S_complex | | 1 | 1 | 1 | 1 |
| GABA_byGAD1_and_SLC6A11_GABA-A_a3b3g2S_complex | | 1 | 1 | 1 | 1 |
| GABA_byGAD1_and_SLC6A12_GABA-A_a3b3g2S_complex | | 1 | 1 | 1 | 1 |
| GABA_byGAD1_and_SLC6A13_GABA-A_a3b3g2S_complex | | 1 | 1 | 1 | 1 |
| GABA_byGAD1_and_SLC6A6_GABA-A_a3b3g2S_complex | | 1 | 1 | 1 | 1 |
| GABA_byGAD1_and_SLC6A8_GABA-A_a3b3g2S_complex | | 1 | 1 | 1 | 1 |
| GABA_byGAD2_and_SLC6A1_GABA-A_a3b3g2S_complex | | 1 | 1 | 1 | 1 |
| GABA_byGAD2_and_SLC6A11_GABA-A_a3b3g2S_complex | | 1 | 1 | 1 | 1 |
| GABA_byGAD2_and_SLC6A12_GABA-A_a3b3g2S_complex | | 1 | 1 | 1 | 1 |
| GABA_byGAD2_and_SLC6A13_GABA-A_a3b3g2S_complex | | 1 | 1 | 1 | 1 |
| GABA_byGAD2_and_SLC6A6_GABA-A_a3b3g2S_complex | | 1 | 1 | 1 | 1 |
| GABA_byGAD2_and_SLC6A8_GABA-A_a3b3g2S_complex | | 1 | 1 | 1 | 1 |
| GABA_byGAD1_and_SLC6A1_GABA-A_a3b3o_complex | | 1 | 1 | 1 | 1 |
| GABA_byGAD1_and_SLC6A11_GABA-A_a3b3o_complex | | 1 | 1 | 1 | 1 |
| GABA_byGAD1_and_SLC6A12_GABA-A_a3b3o_complex | | 1 | 1 | 1 | 1 |
| GABA_byGAD1_and_SLC6A13_GABA-A_a3b3o_complex | | 1 | 1 | 1 | 1 |
| GABA_byGAD1_and_SLC6A6_GABA-A_a3b3o_complex | | 1 | 1 | 1 | 1 |
| GABA_byGAD1_and_SLC6A8_GABA-A_a3b3o_complex | | 1 | 1 | 1 | 1 |
| GABA_byGAD2_and_SLC6A1_GABA-A_a3b3o_complex | | 1 | 1 | 1 | 1 |
| GABA_byGAD2_and_SLC6A11_GABA-A_a3b3o_complex | | 1 | 1 | 1 | 1 |
| GABA_byGAD2_and_SLC6A12_GABA-A_a3b3o_complex | | 1 | 1 | 1 | 1 |
| GABA_byGAD2_and_SLC6A13_GABA-A_a3b3o_complex | | 1 | 1 | 1 | 1 |
| GABA_byGAD2_and_SLC6A6_GABA-A_a3b3o_complex | | 1 | 1 | 1 | 1 |
| GABA_byGAD2_and_SLC6A8_GABA-A_a3b3o_complex | | 1 | 1 | 1 | 1 |
| GABA_byGAD1_and_SLC6A1_GABA-A_a6b3d_complex | | 1 | 1 | 1 | 1 |
| GABA_byGAD1_and_SLC6A11_GABA-A_a6b3d_complex | | 1 | 1 | 1 | 1 |
| GABA_byGAD1_and_SLC6A12_GABA-A_a6b3d_complex | | 1 | 1 | 1 | 1 |
| GABA_byGAD1_and_SLC6A13_GABA-A_a6b3d_complex | | 1 | 1 | 1 | 1 |
| GABA_byGAD1_and_SLC6A6_GABA-A_a6b3d_complex | | 1 | 1 | 1 | 1 |
| GABA_byGAD1_and_SLC6A8_GABA-A_a6b3d_complex | | 1 | 1 | 1 | 1 |
| GABA_byGAD2_and_SLC6A1_GABA-A_a6b3d_complex | | 1 | 1 | 1 | 1 |
| GABA_byGAD2_and_SLC6A11_GABA-A_a6b3d_complex | | 1 | 1 | 1 | 1 |
| GABA_byGAD2_and_SLC6A12_GABA-A_a6b3d_complex | | 1 | 1 | 1 | 1 |
| GABA_byGAD2_and_SLC6A13_GABA-A_a6b3d_complex | | 1 | 1 | 1 | 1 |
| GABA_byGAD2_and_SLC6A6_GABA-A_a6b3d_complex | | 1 | 1 | 1 | 1 |
| GABA_byGAD2_and_SLC6A8_GABA-A_a6b3d_complex | | 1 | 1 | 1 | 1 |
| GABA_byGAD1_and_SLC6A1_GABA-A_a6b3g2S_complex | | 1 | 1 | 1 | 1 |
| GABA_byGAD1_and_SLC6A11_GABA-A_a6b3g2S_complex | | 1 | 1 | 1 | 1 |
| GABA_byGAD1_and_SLC6A12_GABA-A_a6b3g2S_complex | | 1 | 1 | 1 | 1 |
| GABA_byGAD1_and_SLC6A13_GABA-A_a6b3g2S_complex | | 1 | 1 | 1 | 1 |
| GABA_byGAD1_and_SLC6A6_GABA-A_a6b3g2S_complex | | 1 | 1 | 1 | 1 |
| GABA_byGAD1_and_SLC6A8_GABA-A_a6b3g2S_complex | | 1 | 1 | 1 | 1 |
| GABA_byGAD2_and_SLC6A1_GABA-A_a6b3g2S_complex | | 1 | 1 | 1 | 1 |
| GABA_byGAD2_and_SLC6A11_GABA-A_a6b3g2S_complex | | 1 | 1 | 1 | 1 |
| GABA_byGAD2_and_SLC6A12_GABA-A_a6b3g2S_complex | | 1 | 1 | 1 | 1 |
| GABA_byGAD2_and_SLC6A13_GABA-A_a6b3g2S_complex | | 1 | 1 | 1 | 1 |
| GABA_byGAD2_and_SLC6A6_GABA-A_a6b3g2S_complex | | 1 | 1 | 1 | 1 |
| GABA_byGAD2_and_SLC6A8_GABA-A_a6b3g2S_complex | | 1 | 1 | 1 | 1 |
| GAL_GALR2 | | 1 | 1 | 1 | 1 |
| GALP_GALR2 | | 1 | 1 | 1 | 1 |
| GAL_GALR2 | | 1 | 1 | 1 | 1 |
| GALP_GALR2 | | 1 | 1 | 1 | 1 |
| SPX_GALR2 | | 1 | 1 | 1 | 1 |
| GAL_GALR3 | | 1 | 1 | 1 | 1 |
| GALP_GALR3 | | 1 | 1 | 1 | 1 |
| GAL_GALR3 | | 1 | 1 | 1 | 1 |
| GALP_GALR3 | | 1 | 1 | 1 | 1 |
| SPX_GALR3 | | 1 | 1 | 1 | 1 |
| LGALS3_MERTK | | 1 | 1 | 1 | 1 |
| GAS6_MERTK | | 1 | 1 | 1 | 1 |
| LGALS9_BCR_CD45_CD22 | | 1 | 1 | 1 | 1 |
| LGALS9_HAVCR2 | | 1 | 1 | 1 | 1 |
| LGALS9_P4HB | | 1 | 1 | 1 | 1 |
| GIP_GIPR | | 1 | 1 | 1 | 1 |
| GRP_GRPR | | 1 | 1 | 1 | 1 |
| NMB_GRPR | | 1 | 1 | 1 | 1 |
| GRP_NMBR | | 1 | 1 | 1 | 1 |
| NMB_NMBR | | 1 | 1 | 1 | 1 |
| Glutamate_byGLS_and_SLC17A7_GRIA1 | | 1 | 1 | 1 | 1 |
| Glutamate_byGLS_and_SLC17A8_GRIA1 | | 1 | 1 | 1 | 1 |
| Glutamate_byGLS_and_SLC1A1_GRIA1 | | 1 | 1 | 1 | 1 |
| Glutamate_byGLS_and_SLC1A2_GRIA1 | | 1 | 1 | 1 | 1 |
| Glutamate_byGLS_and_SLC1A3_GRIA1 | | 1 | 1 | 1 | 1 |
| Glutamate_byGLS_and_SLC1A7_GRIA1 | | 1 | 1 | 1 | 1 |
| Glutamate_byGLS2_and_SLC17A7_GRIA1 | | 1 | 1 | 1 | 1 |
| Glutamate_byGLS2_and_SLC17A8_GRIA1 | | 1 | 1 | 1 | 1 |
| Glutamate_byGLS2_and_SLC1A1_GRIA1 | | 1 | 1 | 1 | 1 |
| Glutamate_byGLS2_and_SLC1A2_GRIA1 | | 1 | 1 | 1 | 1 |
| Glutamate_byGLS2_and_SLC1A3_GRIA1 | | 1 | 1 | 1 | 1 |
| Glutamate_byGLS2_and_SLC1A7_GRIA1 | | 1 | 1 | 1 | 1 |
| Glutamate_byGLS_and_SLC17A7_GRIA2 | | 1 | 1 | 1 | 1 |
| Glutamate_byGLS_and_SLC17A8_GRIA2 | | 1 | 1 | 1 | 1 |
| Glutamate_byGLS_and_SLC1A1_GRIA2 | | 1 | 1 | 1 | 1 |
| Glutamate_byGLS_and_SLC1A2_GRIA2 | | 1 | 1 | 1 | 1 |
| Glutamate_byGLS_and_SLC1A3_GRIA2 | | 1 | 1 | 1 | 1 |
| Glutamate_byGLS_and_SLC1A7_GRIA2 | | 1 | 1 | 1 | 1 |
| Glutamate_byGLS2_and_SLC17A7_GRIA2 | | 1 | 1 | 1 | 1 |
| Glutamate_byGLS2_and_SLC17A8_GRIA2 | | 1 | 1 | 1 | 1 |
| Glutamate_byGLS2_and_SLC1A1_GRIA2 | | 1 | 1 | 1 | 1 |
| Glutamate_byGLS2_and_SLC1A2_GRIA2 | | 1 | 1 | 1 | 1 |
| Glutamate_byGLS2_and_SLC1A3_GRIA2 | | 1 | 1 | 1 | 1 |
| Glutamate_byGLS2_and_SLC1A7_GRIA2 | | 1 | 1 | 1 | 1 |
| Glutamate_byGLS_and_SLC17A7_GRIA3 | | 1 | 1 | 1 | 1 |
| Glutamate_byGLS_and_SLC17A8_GRIA3 | | 1 | 1 | 1 | 1 |
| Glutamate_byGLS_and_SLC1A1_GRIA3 | | 1 | 1 | 1 | 1 |
| Glutamate_byGLS_and_SLC1A2_GRIA3 | | 1 | 1 | 1 | 1 |
| Glutamate_byGLS_and_SLC1A3_GRIA3 | | 1 | 1 | 1 | 1 |
| Glutamate_byGLS_and_SLC1A7_GRIA3 | | 1 | 1 | 1 | 1 |
| Glutamate_byGLS2_and_SLC17A7_GRIA3 | | 1 | 1 | 1 | 1 |
| Glutamate_byGLS2_and_SLC17A8_GRIA3 | | 1 | 1 | 1 | 1 |
| Glutamate_byGLS2_and_SLC1A1_GRIA3 | | 1 | 1 | 1 | 1 |
| Glutamate_byGLS2_and_SLC1A2_GRIA3 | | 1 | 1 | 1 | 1 |
| Glutamate_byGLS2_and_SLC1A3_GRIA3 | | 1 | 1 | 1 | 1 |
| Glutamate_byGLS2_and_SLC1A7_GRIA3 | | 1 | 1 | 1 | 1 |
| Glutamate_byGLS_and_SLC17A7_GRIA4 | | 1 | 1 | 1 | 1 |
| Glutamate_byGLS_and_SLC17A8_GRIA4 | | 1 | 1 | 1 | 1 |
| Glutamate_byGLS_and_SLC1A1_GRIA4 | | 1 | 1 | 1 | 1 |
| Glutamate_byGLS_and_SLC1A2_GRIA4 | | 1 | 1 | 1 | 1 |
| Glutamate_byGLS_and_SLC1A3_GRIA4 | | 1 | 1 | 1 | 1 |
| Glutamate_byGLS_and_SLC1A7_GRIA4 | | 1 | 1 | 1 | 1 |
| Glutamate_byGLS2_and_SLC17A7_GRIA4 | | 1 | 1 | 1 | 1 |
| Glutamate_byGLS2_and_SLC17A8_GRIA4 | | 1 | 1 | 1 | 1 |
| Glutamate_byGLS2_and_SLC1A1_GRIA4 | | 1 | 1 | 1 | 1 |
| Glutamate_byGLS2_and_SLC1A2_GRIA4 | | 1 | 1 | 1 | 1 |
| Glutamate_byGLS2_and_SLC1A3_GRIA4 | | 1 | 1 | 1 | 1 |
| Glutamate_byGLS2_and_SLC1A7_GRIA4 | | 1 | 1 | 1 | 1 |
| Glutamate_byGLS_and_SLC17A7_GRIK1 | | 1 | 1 | 1 | 1 |
| Glutamate_byGLS_and_SLC17A8_GRIK1 | | 1 | 1 | 1 | 1 |
| Glutamate_byGLS_and_SLC1A1_GRIK1 | | 1 | 1 | 1 | 1 |
| Glutamate_byGLS_and_SLC1A2_GRIK1 | | 1 | 1 | 1 | 1 |
| Glutamate_byGLS_and_SLC1A3_GRIK1 | | 1 | 1 | 1 | 1 |
| Glutamate_byGLS_and_SLC1A7_GRIK1 | | 1 | 1 | 1 | 1 |
| Glutamate_byGLS2_and_SLC17A7_GRIK1 | | 1 | 1 | 1 | 1 |
| Glutamate_byGLS2_and_SLC17A8_GRIK1 | | 1 | 1 | 1 | 1 |
| Glutamate_byGLS2_and_SLC1A1_GRIK1 | | 1 | 1 | 1 | 1 |
| Glutamate_byGLS2_and_SLC1A2_GRIK1 | | 1 | 1 | 1 | 1 |
| Glutamate_byGLS2_and_SLC1A3_GRIK1 | | 1 | 1 | 1 | 1 |
| Glutamate_byGLS2_and_SLC1A7_GRIK1 | | 1 | 1 | 1 | 1 |
| Glutamate_byGLS_and_SLC17A7_Glutamate_Kainate_1_4_complex | | 1 | 1 | 1 | 1 |
| Glutamate_byGLS_and_SLC17A8_Glutamate_Kainate_1_4_complex | | 1 | 1 | 1 | 1 |
| Glutamate_byGLS_and_SLC1A1_Glutamate_Kainate_1_4_complex | | 1 | 1 | 1 | 1 |
| Glutamate_byGLS_and_SLC1A2_Glutamate_Kainate_1_4_complex | | 1 | 1 | 1 | 1 |
| Glutamate_byGLS_and_SLC1A3_Glutamate_Kainate_1_4_complex | | 1 | 1 | 1 | 1 |
| Glutamate_byGLS_and_SLC1A7_Glutamate_Kainate_1_4_complex | | 1 | 1 | 1 | 1 |
| Glutamate_byGLS2_and_SLC17A7_Glutamate_Kainate_1_4_complex | | 1 | 1 | 1 | 1 |
| Glutamate_byGLS2_and_SLC17A8_Glutamate_Kainate_1_4_complex | | 1 | 1 | 1 | 1 |
| Glutamate_byGLS2_and_SLC1A1_Glutamate_Kainate_1_4_complex | | 1 | 1 | 1 | 1 |
| Glutamate_byGLS2_and_SLC1A2_Glutamate_Kainate_1_4_complex | | 1 | 1 | 1 | 1 |
| Glutamate_byGLS2_and_SLC1A3_Glutamate_Kainate_1_4_complex | | 1 | 1 | 1 | 1 |
| Glutamate_byGLS2_and_SLC1A7_Glutamate_Kainate_1_4_complex | | 1 | 1 | 1 | 1 |
| Glutamate_byGLS_and_SLC17A7_Glutamate_Kainate_1_5_complex | | 1 | 1 | 1 | 1 |
| Glutamate_byGLS_and_SLC17A8_Glutamate_Kainate_1_5_complex | | 1 | 1 | 1 | 1 |
| Glutamate_byGLS_and_SLC1A1_Glutamate_Kainate_1_5_complex | | 1 | 1 | 1 | 1 |
| Glutamate_byGLS_and_SLC1A2_Glutamate_Kainate_1_5_complex | | 1 | 1 | 1 | 1 |
| Glutamate_byGLS_and_SLC1A3_Glutamate_Kainate_1_5_complex | | 1 | 1 | 1 | 1 |
| Glutamate_byGLS_and_SLC1A7_Glutamate_Kainate_1_5_complex | | 1 | 1 | 1 | 1 |
| Glutamate_byGLS2_and_SLC17A7_Glutamate_Kainate_1_5_complex | | 1 | 1 | 1 | 1 |
| Glutamate_byGLS2_and_SLC17A8_Glutamate_Kainate_1_5_complex | | 1 | 1 | 1 | 1 |
| Glutamate_byGLS2_and_SLC1A1_Glutamate_Kainate_1_5_complex | | 1 | 1 | 1 | 1 |
| Glutamate_byGLS2_and_SLC1A2_Glutamate_Kainate_1_5_complex | | 1 | 1 | 1 | 1 |
| Glutamate_byGLS2_and_SLC1A3_Glutamate_Kainate_1_5_complex | | 1 | 1 | 1 | 1 |
| Glutamate_byGLS2_and_SLC1A7_Glutamate_Kainate_1_5_complex | | 1 | 1 | 1 | 1 |
| Glutamate_byGLS_and_SLC17A7_GRIK2 | | 1 | 1 | 1 | 1 |
| Glutamate_byGLS_and_SLC17A8_GRIK2 | | 1 | 1 | 1 | 1 |
| Glutamate_byGLS_and_SLC1A1_GRIK2 | | 1 | 1 | 1 | 1 |
| Glutamate_byGLS_and_SLC1A2_GRIK2 | | 1 | 1 | 1 | 1 |
| Glutamate_byGLS_and_SLC1A3_GRIK2 | | 1 | 1 | 1 | 1 |
| Glutamate_byGLS_and_SLC1A7_GRIK2 | | 1 | 1 | 1 | 1 |
| Glutamate_byGLS2_and_SLC17A7_GRIK2 | | 1 | 1 | 1 | 1 |
| Glutamate_byGLS2_and_SLC17A8_GRIK2 | | 1 | 1 | 1 | 1 |
| Glutamate_byGLS2_and_SLC1A1_GRIK2 | | 1 | 1 | 1 | 1 |
| Glutamate_byGLS2_and_SLC1A2_GRIK2 | | 1 | 1 | 1 | 1 |
| Glutamate_byGLS2_and_SLC1A3_GRIK2 | | 1 | 1 | 1 | 1 |
| Glutamate_byGLS2_and_SLC1A7_GRIK2 | | 1 | 1 | 1 | 1 |
| Glutamate_byGLS_and_SLC17A7_Glutamate_Kainate_2_4_complex | | 1 | 1 | 1 | 1 |
| Glutamate_byGLS_and_SLC17A8_Glutamate_Kainate_2_4_complex | | 1 | 1 | 1 | 1 |
| Glutamate_byGLS_and_SLC1A1_Glutamate_Kainate_2_4_complex | | 1 | 1 | 1 | 1 |
| Glutamate_byGLS_and_SLC1A2_Glutamate_Kainate_2_4_complex | | 1 | 1 | 1 | 1 |
| Glutamate_byGLS_and_SLC1A3_Glutamate_Kainate_2_4_complex | | 1 | 1 | 1 | 1 |
| Glutamate_byGLS_and_SLC1A7_Glutamate_Kainate_2_4_complex | | 1 | 1 | 1 | 1 |
| Glutamate_byGLS2_and_SLC17A7_Glutamate_Kainate_2_4_complex | | 1 | 1 | 1 | 1 |
| Glutamate_byGLS2_and_SLC17A8_Glutamate_Kainate_2_4_complex | | 1 | 1 | 1 | 1 |
| Glutamate_byGLS2_and_SLC1A1_Glutamate_Kainate_2_4_complex | | 1 | 1 | 1 | 1 |
| Glutamate_byGLS2_and_SLC1A2_Glutamate_Kainate_2_4_complex | | 1 | 1 | 1 | 1 |
| Glutamate_byGLS2_and_SLC1A3_Glutamate_Kainate_2_4_complex | | 1 | 1 | 1 | 1 |
| Glutamate_byGLS2_and_SLC1A7_Glutamate_Kainate_2_4_complex | | 1 | 1 | 1 | 1 |
| Glutamate_byGLS_and_SLC17A7_Glutamate_Kainate_2_5_complex | | 1 | 1 | 1 | 1 |
| Glutamate_byGLS_and_SLC17A8_Glutamate_Kainate_2_5_complex | | 1 | 1 | 1 | 1 |
| Glutamate_byGLS_and_SLC1A1_Glutamate_Kainate_2_5_complex | | 1 | 1 | 1 | 1 |
| Glutamate_byGLS_and_SLC1A2_Glutamate_Kainate_2_5_complex | | 1 | 1 | 1 | 1 |
| Glutamate_byGLS_and_SLC1A3_Glutamate_Kainate_2_5_complex | | 1 | 1 | 1 | 1 |
| Glutamate_byGLS_and_SLC1A7_Glutamate_Kainate_2_5_complex | | 1 | 1 | 1 | 1 |
| Glutamate_byGLS2_and_SLC17A7_Glutamate_Kainate_2_5_complex | | 1 | 1 | 1 | 1 |
| Glutamate_byGLS2_and_SLC17A8_Glutamate_Kainate_2_5_complex | | 1 | 1 | 1 | 1 |
| Glutamate_byGLS2_and_SLC1A1_Glutamate_Kainate_2_5_complex | | 1 | 1 | 1 | 1 |
| Glutamate_byGLS2_and_SLC1A2_Glutamate_Kainate_2_5_complex | | 1 | 1 | 1 | 1 |
| Glutamate_byGLS2_and_SLC1A3_Glutamate_Kainate_2_5_complex | | 1 | 1 | 1 | 1 |
| Glutamate_byGLS2_and_SLC1A7_Glutamate_Kainate_2_5_complex | | 1 | 1 | 1 | 1 |
| Glutamate_byGLS_and_SLC17A7_GRIK3 | | 1 | 1 | 1 | 1 |
| Glutamate_byGLS_and_SLC17A8_GRIK3 | | 1 | 1 | 1 | 1 |
| Glutamate_byGLS_and_SLC1A1_GRIK3 | | 1 | 1 | 1 | 1 |
| Glutamate_byGLS_and_SLC1A2_GRIK3 | | 1 | 1 | 1 | 1 |
| Glutamate_byGLS_and_SLC1A3_GRIK3 | | 1 | 1 | 1 | 1 |
| Glutamate_byGLS_and_SLC1A7_GRIK3 | | 1 | 1 | 1 | 1 |
| Glutamate_byGLS2_and_SLC17A7_GRIK3 | | 1 | 1 | 1 | 1 |
| Glutamate_byGLS2_and_SLC17A8_GRIK3 | | 1 | 1 | 1 | 1 |
| Glutamate_byGLS2_and_SLC1A1_GRIK3 | | 1 | 1 | 1 | 1 |
| Glutamate_byGLS2_and_SLC1A2_GRIK3 | | 1 | 1 | 1 | 1 |
| Glutamate_byGLS2_and_SLC1A3_GRIK3 | | 1 | 1 | 1 | 1 |
| Glutamate_byGLS2_and_SLC1A7_GRIK3 | | 1 | 1 | 1 | 1 |
| Glutamate_byGLS_and_SLC17A7_Glutamate_Kainate_3_4_complex | | 1 | 1 | 1 | 1 |
| Glutamate_byGLS_and_SLC17A8_Glutamate_Kainate_3_4_complex | | 1 | 1 | 1 | 1 |
| Glutamate_byGLS_and_SLC1A1_Glutamate_Kainate_3_4_complex | | 1 | 1 | 1 | 1 |
| Glutamate_byGLS_and_SLC1A2_Glutamate_Kainate_3_4_complex | | 1 | 1 | 1 | 1 |
| Glutamate_byGLS_and_SLC1A3_Glutamate_Kainate_3_4_complex | | 1 | 1 | 1 | 1 |
| Glutamate_byGLS_and_SLC1A7_Glutamate_Kainate_3_4_complex | | 1 | 1 | 1 | 1 |
| Glutamate_byGLS2_and_SLC17A7_Glutamate_Kainate_3_4_complex | | 1 | 1 | 1 | 1 |
| Glutamate_byGLS2_and_SLC17A8_Glutamate_Kainate_3_4_complex | | 1 | 1 | 1 | 1 |
| Glutamate_byGLS2_and_SLC1A1_Glutamate_Kainate_3_4_complex | | 1 | 1 | 1 | 1 |
| Glutamate_byGLS2_and_SLC1A2_Glutamate_Kainate_3_4_complex | | 1 | 1 | 1 | 1 |
| Glutamate_byGLS2_and_SLC1A3_Glutamate_Kainate_3_4_complex | | 1 | 1 | 1 | 1 |
| Glutamate_byGLS2_and_SLC1A7_Glutamate_Kainate_3_4_complex | | 1 | 1 | 1 | 1 |
| Glutamate_byGLS_and_SLC17A7_Glutamate_Kainate_3_5_complex | | 1 | 1 | 1 | 1 |
| Glutamate_byGLS_and_SLC17A8_Glutamate_Kainate_3_5_complex | | 1 | 1 | 1 | 1 |
| Glutamate_byGLS_and_SLC1A1_Glutamate_Kainate_3_5_complex | | 1 | 1 | 1 | 1 |
| Glutamate_byGLS_and_SLC1A2_Glutamate_Kainate_3_5_complex | | 1 | 1 | 1 | 1 |
| Glutamate_byGLS_and_SLC1A3_Glutamate_Kainate_3_5_complex | | 1 | 1 | 1 | 1 |
| Glutamate_byGLS_and_SLC1A7_Glutamate_Kainate_3_5_complex | | 1 | 1 | 1 | 1 |
| Glutamate_byGLS2_and_SLC17A7_Glutamate_Kainate_3_5_complex | | 1 | 1 | 1 | 1 |
| Glutamate_byGLS2_and_SLC17A8_Glutamate_Kainate_3_5_complex | | 1 | 1 | 1 | 1 |
| Glutamate_byGLS2_and_SLC1A1_Glutamate_Kainate_3_5_complex | | 1 | 1 | 1 | 1 |
| Glutamate_byGLS2_and_SLC1A2_Glutamate_Kainate_3_5_complex | | 1 | 1 | 1 | 1 |
| Glutamate_byGLS2_and_SLC1A3_Glutamate_Kainate_3_5_complex | | 1 | 1 | 1 | 1 |
| Glutamate_byGLS2_and_SLC1A7_Glutamate_Kainate_3_5_complex | | 1 | 1 | 1 | 1 |
| Glutamate_byGLS_and_SLC17A7_Glutamate_NMDA_1_2A_complex | | 1 | 1 | 1 | 1 |
| Glutamate_byGLS_and_SLC17A8_Glutamate_NMDA_1_2A_complex | | 1 | 1 | 1 | 1 |
| Glutamate_byGLS_and_SLC1A1_Glutamate_NMDA_1_2A_complex | | 1 | 1 | 1 | 1 |
| Glutamate_byGLS_and_SLC1A2_Glutamate_NMDA_1_2A_complex | | 1 | 1 | 1 | 1 |
| Glutamate_byGLS_and_SLC1A3_Glutamate_NMDA_1_2A_complex | | 1 | 1 | 1 | 1 |
| Glutamate_byGLS_and_SLC1A7_Glutamate_NMDA_1_2A_complex | | 1 | 1 | 1 | 1 |
| Glutamate_byGLS2_and_SLC17A7_Glutamate_NMDA_1_2A_complex | | 1 | 1 | 1 | 1 |
| Glutamate_byGLS2_and_SLC17A8_Glutamate_NMDA_1_2A_complex | | 1 | 1 | 1 | 1 |
| Glutamate_byGLS2_and_SLC1A1_Glutamate_NMDA_1_2A_complex | | 1 | 1 | 1 | 1 |
| Glutamate_byGLS2_and_SLC1A2_Glutamate_NMDA_1_2A_complex | | 1 | 1 | 1 | 1 |
| Glutamate_byGLS2_and_SLC1A3_Glutamate_NMDA_1_2A_complex | | 1 | 1 | 1 | 1 |
| Glutamate_byGLS2_and_SLC1A7_Glutamate_NMDA_1_2A_complex | | 1 | 1 | 1 | 1 |
| Glutamate_byGLS_and_SLC17A7_Glutamate_NMDA_1_2B_complex | | 1 | 1 | 1 | 1 |
| Glutamate_byGLS_and_SLC17A8_Glutamate_NMDA_1_2B_complex | | 1 | 1 | 1 | 1 |
| Glutamate_byGLS_and_SLC1A1_Glutamate_NMDA_1_2B_complex | | 1 | 1 | 1 | 1 |
| Glutamate_byGLS_and_SLC1A2_Glutamate_NMDA_1_2B_complex | | 1 | 1 | 1 | 1 |
| Glutamate_byGLS_and_SLC1A3_Glutamate_NMDA_1_2B_complex | | 1 | 1 | 1 | 1 |
| Glutamate_byGLS_and_SLC1A7_Glutamate_NMDA_1_2B_complex | | 1 | 1 | 1 | 1 |
| Glutamate_byGLS2_and_SLC17A7_Glutamate_NMDA_1_2B_complex | | 1 | 1 | 1 | 1 |
| Glutamate_byGLS2_and_SLC17A8_Glutamate_NMDA_1_2B_complex | | 1 | 1 | 1 | 1 |
| Glutamate_byGLS2_and_SLC1A1_Glutamate_NMDA_1_2B_complex | | 1 | 1 | 1 | 1 |
| Glutamate_byGLS2_and_SLC1A2_Glutamate_NMDA_1_2B_complex | | 1 | 1 | 1 | 1 |
| Glutamate_byGLS2_and_SLC1A3_Glutamate_NMDA_1_2B_complex | | 1 | 1 | 1 | 1 |
| Glutamate_byGLS2_and_SLC1A7_Glutamate_NMDA_1_2B_complex | | 1 | 1 | 1 | 1 |
| Glutamate_byGLS_and_SLC17A7_Glutamate_NMDA_1_2C_complex | | 1 | 1 | 1 | 1 |
| Glutamate_byGLS_and_SLC17A8_Glutamate_NMDA_1_2C_complex | | 1 | 1 | 1 | 1 |
| Glutamate_byGLS_and_SLC1A1_Glutamate_NMDA_1_2C_complex | | 1 | 1 | 1 | 1 |
| Glutamate_byGLS_and_SLC1A2_Glutamate_NMDA_1_2C_complex | | 1 | 1 | 1 | 1 |
| Glutamate_byGLS_and_SLC1A3_Glutamate_NMDA_1_2C_complex | | 1 | 1 | 1 | 1 |
| Glutamate_byGLS_and_SLC1A7_Glutamate_NMDA_1_2C_complex | | 1 | 1 | 1 | 1 |
| Glutamate_byGLS2_and_SLC17A7_Glutamate_NMDA_1_2C_complex | | 1 | 1 | 1 | 1 |
| Glutamate_byGLS2_and_SLC17A8_Glutamate_NMDA_1_2C_complex | | 1 | 1 | 1 | 1 |
| Glutamate_byGLS2_and_SLC1A1_Glutamate_NMDA_1_2C_complex | | 1 | 1 | 1 | 1 |
| Glutamate_byGLS2_and_SLC1A2_Glutamate_NMDA_1_2C_complex | | 1 | 1 | 1 | 1 |
| Glutamate_byGLS2_and_SLC1A3_Glutamate_NMDA_1_2C_complex | | 1 | 1 | 1 | 1 |
| Glutamate_byGLS2_and_SLC1A7_Glutamate_NMDA_1_2C_complex | | 1 | 1 | 1 | 1 |
| Glutamate_byGLS_and_SLC17A7_Glutamate_NMDA_1_2D_complex | | 1 | 1 | 1 | 1 |
| Glutamate_byGLS_and_SLC17A8_Glutamate_NMDA_1_2D_complex | | 1 | 1 | 1 | 1 |
| Glutamate_byGLS_and_SLC1A1_Glutamate_NMDA_1_2D_complex | | 1 | 1 | 1 | 1 |
| Glutamate_byGLS_and_SLC1A2_Glutamate_NMDA_1_2D_complex | | 1 | 1 | 1 | 1 |
| Glutamate_byGLS_and_SLC1A3_Glutamate_NMDA_1_2D_complex | | 1 | 1 | 1 | 1 |
| Glutamate_byGLS_and_SLC1A7_Glutamate_NMDA_1_2D_complex | | 1 | 1 | 1 | 1 |
| Glutamate_byGLS2_and_SLC17A7_Glutamate_NMDA_1_2D_complex | | 1 | 1 | 1 | 1 |
| Glutamate_byGLS2_and_SLC17A8_Glutamate_NMDA_1_2D_complex | | 1 | 1 | 1 | 1 |
| Glutamate_byGLS2_and_SLC1A1_Glutamate_NMDA_1_2D_complex | | 1 | 1 | 1 | 1 |
| Glutamate_byGLS2_and_SLC1A2_Glutamate_NMDA_1_2D_complex | | 1 | 1 | 1 | 1 |
| Glutamate_byGLS2_and_SLC1A3_Glutamate_NMDA_1_2D_complex | | 1 | 1 | 1 | 1 |
| Glutamate_byGLS2_and_SLC1A7_Glutamate_NMDA_1_2D_complex | | 1 | 1 | 1 | 1 |
| Glutamate_byGLS_and_SLC17A7_GRM1 | | 1 | 1 | 1 | 1 |
| Glutamate_byGLS_and_SLC17A8_GRM1 | | 1 | 1 | 1 | 1 |
| Glutamate_byGLS_and_SLC1A1_GRM1 | | 1 | 1 | 1 | 1 |
| Glutamate_byGLS_and_SLC1A2_GRM1 | | 1 | 1 | 1 | 1 |
| Glutamate_byGLS_and_SLC1A3_GRM1 | | 1 | 1 | 1 | 1 |
| Glutamate_byGLS_and_SLC1A7_GRM1 | | 1 | 1 | 1 | 1 |
| Glutamate_byGLS2_and_SLC17A7_GRM1 | | 1 | 1 | 1 | 1 |
| Glutamate_byGLS2_and_SLC17A8_GRM1 | | 1 | 1 | 1 | 1 |
| Glutamate_byGLS2_and_SLC1A1_GRM1 | | 1 | 1 | 1 | 1 |
| Glutamate_byGLS2_and_SLC1A2_GRM1 | | 1 | 1 | 1 | 1 |
| Glutamate_byGLS2_and_SLC1A3_GRM1 | | 1 | 1 | 1 | 1 |
| Glutamate_byGLS2_and_SLC1A7_GRM1 | | 1 | 1 | 1 | 1 |
| Glutamate_byGLS_and_SLC17A7_GRM2 | | 1 | 1 | 1 | 1 |
| Glutamate_byGLS_and_SLC17A8_GRM2 | | 1 | 1 | 1 | 1 |
| Glutamate_byGLS_and_SLC1A1_GRM2 | | 1 | 1 | 1 | 1 |
| Glutamate_byGLS_and_SLC1A2_GRM2 | | 1 | 1 | 1 | 1 |
| Glutamate_byGLS_and_SLC1A3_GRM2 | | 1 | 1 | 1 | 1 |
| Glutamate_byGLS_and_SLC1A7_GRM2 | | 1 | 1 | 1 | 1 |
| Glutamate_byGLS2_and_SLC17A7_GRM2 | | 1 | 1 | 1 | 1 |
| Glutamate_byGLS2_and_SLC17A8_GRM2 | | 1 | 1 | 1 | 1 |
| Glutamate_byGLS2_and_SLC1A1_GRM2 | | 1 | 1 | 1 | 1 |
| Glutamate_byGLS2_and_SLC1A2_GRM2 | | 1 | 1 | 1 | 1 |
| Glutamate_byGLS2_and_SLC1A3_GRM2 | | 1 | 1 | 1 | 1 |
| Glutamate_byGLS2_and_SLC1A7_GRM2 | | 1 | 1 | 1 | 1 |
| Glutamate_byGLS_and_SLC17A7_GRM3 | | 1 | 1 | 1 | 1 |
| Glutamate_byGLS_and_SLC17A8_GRM3 | | 1 | 1 | 1 | 1 |
| Glutamate_byGLS_and_SLC1A1_GRM3 | | 1 | 1 | 1 | 1 |
| Glutamate_byGLS_and_SLC1A2_GRM3 | | 1 | 1 | 1 | 1 |
| Glutamate_byGLS_and_SLC1A3_GRM3 | | 1 | 1 | 1 | 1 |
| Glutamate_byGLS_and_SLC1A7_GRM3 | | 1 | 1 | 1 | 1 |
| Glutamate_byGLS2_and_SLC17A7_GRM3 | | 1 | 1 | 1 | 1 |
| Glutamate_byGLS2_and_SLC17A8_GRM3 | | 1 | 1 | 1 | 1 |
| Glutamate_byGLS2_and_SLC1A1_GRM3 | | 1 | 1 | 1 | 1 |
| Glutamate_byGLS2_and_SLC1A2_GRM3 | | 1 | 1 | 1 | 1 |
| Glutamate_byGLS2_and_SLC1A3_GRM3 | | 1 | 1 | 1 | 1 |
| Glutamate_byGLS2_and_SLC1A7_GRM3 | | 1 | 1 | 1 | 1 |
| Glutamate_byGLS_and_SLC17A7_GRM4 | | 1 | 1 | 1 | 1 |
| Glutamate_byGLS_and_SLC17A8_GRM4 | | 1 | 1 | 1 | 1 |
| Glutamate_byGLS_and_SLC1A1_GRM4 | | 1 | 1 | 1 | 1 |
| Glutamate_byGLS_and_SLC1A2_GRM4 | | 1 | 1 | 1 | 1 |
| Glutamate_byGLS_and_SLC1A3_GRM4 | | 1 | 1 | 1 | 1 |
| Glutamate_byGLS_and_SLC1A7_GRM4 | | 1 | 1 | 1 | 1 |
| Glutamate_byGLS2_and_SLC17A7_GRM4 | | 1 | 1 | 1 | 1 |
| Glutamate_byGLS2_and_SLC17A8_GRM4 | | 1 | 1 | 1 | 1 |
| Glutamate_byGLS2_and_SLC1A1_GRM4 | | 1 | 1 | 1 | 1 |
| Glutamate_byGLS2_and_SLC1A2_GRM4 | | 1 | 1 | 1 | 1 |
| Glutamate_byGLS2_and_SLC1A3_GRM4 | | 1 | 1 | 1 | 1 |
| Glutamate_byGLS2_and_SLC1A7_GRM4 | | 1 | 1 | 1 | 1 |
| Glutamate_byGLS_and_SLC17A7_GRM5 | | 1 | 1 | 1 | 1 |
| Glutamate_byGLS_and_SLC17A8_GRM5 | | 1 | 1 | 1 | 1 |
| Glutamate_byGLS_and_SLC1A1_GRM5 | | 1 | 1 | 1 | 1 |
| Glutamate_byGLS_and_SLC1A2_GRM5 | | 1 | 1 | 1 | 1 |
| Glutamate_byGLS_and_SLC1A3_GRM5 | | 1 | 1 | 1 | 1 |
| Glutamate_byGLS_and_SLC1A7_GRM5 | | 1 | 1 | 1 | 1 |
| Glutamate_byGLS2_and_SLC17A7_GRM5 | | 1 | 1 | 1 | 1 |
| Glutamate_byGLS2_and_SLC17A8_GRM5 | | 1 | 1 | 1 | 1 |
| Glutamate_byGLS2_and_SLC1A1_GRM5 | | 1 | 1 | 1 | 1 |
| Glutamate_byGLS2_and_SLC1A2_GRM5 | | 1 | 1 | 1 | 1 |
| Glutamate_byGLS2_and_SLC1A3_GRM5 | | 1 | 1 | 1 | 1 |
| Glutamate_byGLS2_and_SLC1A7_GRM5 | | 1 | 1 | 1 | 1 |
| Glutamate_byGLS_and_SLC17A7_GRM6 | | 1 | 1 | 1 | 1 |
| Glutamate_byGLS_and_SLC17A8_GRM6 | | 1 | 1 | 1 | 1 |
| Glutamate_byGLS_and_SLC1A1_GRM6 | | 1 | 1 | 1 | 1 |
| Glutamate_byGLS_and_SLC1A2_GRM6 | | 1 | 1 | 1 | 1 |
| Glutamate_byGLS_and_SLC1A3_GRM6 | | 1 | 1 | 1 | 1 |
| Glutamate_byGLS_and_SLC1A7_GRM6 | | 1 | 1 | 1 | 1 |
| Glutamate_byGLS2_and_SLC17A7_GRM6 | | 1 | 1 | 1 | 1 |
| Glutamate_byGLS2_and_SLC17A8_GRM6 | | 1 | 1 | 1 | 1 |
| Glutamate_byGLS2_and_SLC1A1_GRM6 | | 1 | 1 | 1 | 1 |
| Glutamate_byGLS2_and_SLC1A2_GRM6 | | 1 | 1 | 1 | 1 |
| Glutamate_byGLS2_and_SLC1A3_GRM6 | | 1 | 1 | 1 | 1 |
| Glutamate_byGLS2_and_SLC1A7_GRM6 | | 1 | 1 | 1 | 1 |
| Glutamate_byGLS_and_SLC17A7_GRM7 | | 1 | 1 | 1 | 1 |
| Glutamate_byGLS_and_SLC17A8_GRM7 | | 1 | 1 | 1 | 1 |
| Glutamate_byGLS_and_SLC1A1_GRM7 | | 1 | 1 | 1 | 1 |
| Glutamate_byGLS_and_SLC1A2_GRM7 | | 1 | 1 | 1 | 1 |
| Glutamate_byGLS_and_SLC1A3_GRM7 | | 1 | 1 | 1 | 1 |
| Glutamate_byGLS_and_SLC1A7_GRM7 | | 1 | 1 | 1 | 1 |
| Glutamate_byGLS2_and_SLC17A7_GRM7 | | 1 | 1 | 1 | 1 |
| Glutamate_byGLS2_and_SLC17A8_GRM7 | | 1 | 1 | 1 | 1 |
| Glutamate_byGLS2_and_SLC1A1_GRM7 | | 1 | 1 | 1 | 1 |
| Glutamate_byGLS2_and_SLC1A2_GRM7 | | 1 | 1 | 1 | 1 |
| Glutamate_byGLS2_and_SLC1A3_GRM7 | | 1 | 1 | 1 | 1 |
| Glutamate_byGLS2_and_SLC1A7_GRM7 | | 1 | 1 | 1 | 1 |
| Glutamate_byGLS_and_SLC17A7_GRM8 | | 1 | 1 | 1 | 1 |
| Glutamate_byGLS_and_SLC17A8_GRM8 | | 1 | 1 | 1 | 1 |
| Glutamate_byGLS_and_SLC1A1_GRM8 | | 1 | 1 | 1 | 1 |
| Glutamate_byGLS_and_SLC1A2_GRM8 | | 1 | 1 | 1 | 1 |
| Glutamate_byGLS_and_SLC1A3_GRM8 | | 1 | 1 | 1 | 1 |
| Glutamate_byGLS_and_SLC1A7_GRM8 | | 1 | 1 | 1 | 1 |
| Glutamate_byGLS2_and_SLC17A7_GRM8 | | 1 | 1 | 1 | 1 |
| Glutamate_byGLS2_and_SLC17A8_GRM8 | | 1 | 1 | 1 | 1 |
| Glutamate_byGLS2_and_SLC1A1_GRM8 | | 1 | 1 | 1 | 1 |
| Glutamate_byGLS2_and_SLC1A2_GRM8 | | 1 | 1 | 1 | 1 |
| Glutamate_byGLS2_and_SLC1A3_GRM8 | | 1 | 1 | 1 | 1 |
| Glutamate_byGLS2_and_SLC1A7_GRM8 | | 1 | 1 | 1 | 1 |
| Glycine_bySHMT1_and_SLC6A5_Glycine_a1b_complex | | 1 | 1 | 1 | 1 |
| Glycine_bySHMT1_and_SLC6A9_Glycine_a1b_complex | | 1 | 1 | 1 | 1 |
| Glycine_bySHMT2_and_SLC6A5_Glycine_a1b_complex | | 1 | 1 | 1 | 1 |
| Glycine_bySHMT2_and_SLC6A9_Glycine_a1b_complex | | 1 | 1 | 1 | 1 |
| Glycine_bySHMT1_and_SLC6A5_Glycine_a2_complex | | 1 | 1 | 1 | 1 |
| Glycine_bySHMT1_and_SLC6A9_Glycine_a2_complex | | 1 | 1 | 1 | 1 |
| Glycine_bySHMT2_and_SLC6A5_Glycine_a2_complex | | 1 | 1 | 1 | 1 |
| Glycine_bySHMT2_and_SLC6A9_Glycine_a2_complex | | 1 | 1 | 1 | 1 |
| GAS6_AXL | | 1 | 1 | 1 | 1 |
| GAS6_TYRO3 | | 1 | 1 | 1 | 1 |
| TULP1_TYRO3 | | 1 | 1 | 1 | 1 |
| GDF10_ACVR_1B2B_receptor | | 1 | 1 | 1 | 1 |
| GDF11_ACVR_1B2B_receptor | | 1 | 1 | 1 | 1 |
| MSTN_ACVR_1B2B_receptor | | 1 | 1 | 1 | 1 |
| Activin_ligand_ab_ACVR_1B2B_receptor | | 1 | 1 | 1 | 1 |
| INHA_ACVR_1B2B_receptor | | 1 | 1 | 1 | 1 |
| Inhibin_ligand_A_ACVR_1B2B_receptor | | 1 | 1 | 1 | 1 |
| Inhibin_ligand_B_ACVR_1B2B_receptor | | 1 | 1 | 1 | 1 |
| GDF11_ACVR_1B2A_receptor | | 1 | 1 | 1 | 1 |
| Activin_ligand_ab_ACVR_1B2A_receptor | | 1 | 1 | 1 | 1 |
| INHA_ACVR_1B2A_receptor | | 1 | 1 | 1 | 1 |
| Inhibin_ligand_A_ACVR_1B2A_receptor | | 1 | 1 | 1 | 1 |
| Inhibin_ligand_B_ACVR_1B2A_receptor | | 1 | 1 | 1 | 1 |
| GDF11_TGFR_AVR2A | | 1 | 1 | 1 | 1 |
| MSTN_TGFR_AVR2A | | 1 | 1 | 1 | 1 |
| GDF11_TGFR_AVR2B | | 1 | 1 | 1 | 1 |
| MSTN_TGFR_AVR2B | | 1 | 1 | 1 | 1 |
| GDF9_TGFR_BMPR2 | | 1 | 1 | 1 | 1 |
| GHRH_GHRHR | | 1 | 1 | 1 | 1 |
| GHRL_GHRHR | | 1 | 1 | 1 | 1 |
| GHRL_GHSR | | 1 | 1 | 1 | 1 |
| GHRL_GPR39 | | 1 | 1 | 1 | 1 |
| Histamine_byHDC_HRH1 | | 1 | 1 | 1 | 1 |
| Histamine_byHDC_HRH2 | | 1 | 1 | 1 | 1 |
| HLA-A_KIR3DL1 | | 1 | 1 | 1 | 1 |
| HLA-F_KIR3DL1 | | 1 | 1 | 1 | 1 |
| HLA-B_KIR3DL2 | | 1 | 1 | 1 | 1 |
| HLA-F_KIR3DL2 | | 1 | 1 | 1 | 1 |
| HLA-C_KIR2DL1 | | 1 | 1 | 1 | 1 |
| HLA-C_KIR2DL3 | | 1 | 1 | 1 | 1 |
| HLA-E_KLRC1 | | 1 | 1 | 1 | 1 |
| HLA-E_CD94:NKG2A | | 1 | 1 | 1 | 1 |
| HLA-E_KLRC2 | | 1 | 1 | 1 | 1 |
| HLA-E_CD94:NKG2C | | 1 | 1 | 1 | 1 |
| HLA-E_CD94:NKG2E | | 1 | 1 | 1 | 1 |
| HLA-E_KLRK1 | | 1 | 1 | 1 | 1 |
| HLA-E_VSIR | | 1 | 1 | 1 | 1 |
| HLA-F_VSIR | | 1 | 1 | 0 | 0 |
| HLA-F_LILRB1 | | 1 | 1 | 1 | 1 |
| HLA-G_LILRB1 | | 1 | 1 | 1 | 1 |
| HLA-F_LILRB2 | | 1 | 1 | 1 | 1 |
| HLA-G_LILRB2 | | 1 | 1 | 1 | 1 |
| CD1D_LILRB2 | | 1 | 1 | 1 | 1 |
| Activin_ligand_ab_ACVR_1C2A_receptor | | 1 | 1 | 1 | 1 |
| INHA_ACVR_1C2A_receptor | | 1 | 1 | 1 | 1 |
| Inhibin_ligand_A_ACVR_1C2A_receptor | | 1 | 1 | 1 | 1 |
| Inhibin_ligand_B_ACVR_1C2A_receptor | | 1 | 1 | 1 | 1 |
| Activin_ligand_ab_ACVR_1C2B_receptor | | 1 | 1 | 1 | 1 |
| INHA_ACVR_1C2B_receptor | | 1 | 1 | 1 | 1 |
| Inhibin_ligand_A_ACVR_1C2B_receptor | | 1 | 1 | 1 | 1 |
| Inhibin_ligand_B_ACVR_1C2B_receptor | | 1 | 1 | 1 | 1 |
| INSL3_RXFP2 | | 1 | 1 | 1 | 1 |
| RLN1_RXFP2 | | 1 | 1 | 1 | 1 |
| RLN2_RXFP2 | | 1 | 1 | 1 | 1 |
| RLN3_RXFP2 | | 1 | 1 | 1 | 1 |
| INSL5_RXFP4 | | 1 | 1 | 1 | 1 |
| KNG1_RXFP4 | | 1 | 1 | 1 | 1 |
| RLN3_RXFP4 | | 1 | 1 | 1 | 1 |
| IGF1_IGF1R_enhancerComGPC3 | | 1 | 1 | 1 | 1 |
| IGF1_IGF1R | | 1 | 1 | 1 | 1 |
| IGF2_IGF1R | | 1 | 1 | 1 | 1 |
| IGF1_integrin_a6b4_complex | | 1 | 1 | 1 | 1 |
| NRG1_integrin_a6b4_complex | | 1 | 1 | 1 | 1 |
| IGF2_IGF2R | | 1 | 1 | 0 | 0 |
| IGFBP3_TMEM219 | | 1 | 1 | 1 | 1 |
| IGFL2_IGFLR1 | | 1 | 1 | 1 | 1 |
| IFNA5_Type_I_IFNR | | 1 | 1 | 1 | 1 |
| IFNK_Type_I_IFNR | | 1 | 1 | 1 | 1 |
| IFNG_Type_II_IFNR | | 0 | 1 | 1 | 1 |
| IFNL1_Type_III_IFNR | | 1 | 1 | 1 | 1 |
| IL35_IL35_receptor | | 1 | 1 | 1 | 1 |
| IL27_IL27_receptor | | 1 | 1 | 1 | 1 |
| IL10_IL10_receptor | | 1 | 1 | 1 | 1 |
| IL11_IL11_receptor | | 1 | 1 | 1 | 1 |
| IL12_IL12_receptor | | 1 | 1 | 1 | 1 |
| IL23_IL23_receptor | | 1 | 1 | 1 | 1 |
| IL13_IL13_receptor | | 1 | 1 | 1 | 1 |
| IL4_IL13_receptor | | 1 | 1 | 1 | 1 |
| IL13_IL13RA2 | | 1 | 1 | 1 | 1 |
| IL15_IL15_receptor | | 1 | 1 | 1 | 1 |
| IL17_AF_IL17_receptor_AC | | 1 | 1 | 1 | 1 |
| IL17F_IL17_receptor_AC | | 1 | 1 | 1 | 1 |
| IL17C_IL17_receptor_AE | | 1 | 1 | 1 | 1 |
| IL18_IL18_receptor | | 1 | 1 | 0 | 0 |
| IL19_IL20_receptor_Type_I | | 1 | 1 | 1 | 1 |
| IL20_IL20_receptor_Type_I | | 1 | 1 | 1 | 1 |
| IL24_IL20_receptor_Type_I | | 1 | 1 | 1 | 1 |
| IL1A_IL1_receptor | | 1 | 1 | 1 | 1 |
| IL1B_IL1_receptor | | 1 | 1 | 1 | 1 |
| IL1RN_IL1_receptor | | 1 | 1 | 1 | 1 |
| IL1A_IL1_receptor_inhibitor | | 1 | 1 | 1 | 1 |
| IL1B_IL1_receptor_inhibitor | | 1 | 1 | 1 | 1 |
| IL1RN_IL1_receptor_inhibitor | | 1 | 1 | 1 | 1 |
| IL1F10_IL36_receptor | | 1 | 1 | 1 | 1 |
| IL1RAP_PTPRF | | 1 | 1 | 1 | 1 |
| LRRC4B_PTPRF | | 1 | 1 | 1 | 1 |
| LRRC4C_PTPRF | | 1 | 1 | 1 | 1 |
| LRFN4_PTPRF | | 1 | 1 | 1 | 1 |
| LRFN5_PTPRF | | 1 | 1 | 1 | 1 |
| IL2_IL2_receptor_HA | | 1 | 1 | 1 | 1 |
| IL2_IL2_receptor_I | | 1 | 1 | 1 | 1 |
| IL20_IL20_receptor_Type_II | | 1 | 1 | 1 | 1 |
| IL24_IL20_receptor_Type_II | | 1 | 1 | 1 | 1 |
| IL22_IL22_receptor | | 1 | 1 | 1 | 1 |
| IL26_IL26_receptor | | 1 | 1 | 1 | 1 |
| IL33_IL33_receptor | | 1 | 1 | 1 | 1 |
| IL4_IL4_receptor | | 1 | 1 | 1 | 1 |
| IL5_IL5_receptor | | 1 | 1 | 1 | 1 |
| IL6_IL6_receptor | | 1 | 1 | 1 | 1 |
| IL7_IL7_receptor | | 1 | 1 | 0 | 0 |
| RAET1E_NKG2D_II_receptor | | 1 | 1 | 1 | 1 |
| RAET1G_NKG2D_II_receptor | | 1 | 1 | 1 | 1 |
| RAET1L_NKG2D_II_receptor | | 1 | 1 | 1 | 1 |
| ULBP1_NKG2D_II_receptor | | 1 | 1 | 1 | 1 |
| ULBP2_NKG2D_II_receptor | | 1 | 1 | 1 | 1 |
| ULBP3_NKG2D_II_receptor | | 1 | 1 | 1 | 1 |
| MICA_NKG2D_II_receptor | | 1 | 1 | 0 | 0 |
| MICB_NKG2D_II_receptor | | 1 | 1 | 1 | 1 |
| KNG1_BDKRB1 | | 1 | 1 | 1 | 1 |
| KNG1_BDKRB2 | | 1 | 1 | 1 | 1 |
| LEFTY1_TDGF1 | | 1 | 1 | 1 | 1 |
| LEFTY2_TDGF1 | | 1 | 1 | 1 | 1 |
| CLEC2B_KLRF1 | | 1 | 1 | 1 | 1 |
| LRRC4B_PTPRD | | 1 | 1 | 1 | 1 |
| LRFN4_PTPRD | | 1 | 1 | 1 | 1 |
| LRFN5_PTPRD | | 1 | 1 | 1 | 1 |
| NLGN3_PTPRD | | 1 | 1 | 1 | 1 |
| SLITRK1_PTPRD | | 1 | 1 | 1 | 1 |
| SLITRK3_PTPRD | | 1 | 1 | 1 | 1 |
| LeukotrieneE4_byDPEP1_CYSLTR1 | 1 | | 1 | 1 | 1 |
| LeukotrieneE4_byDPEP2_CYSLTR1 | 1 | | 1 | 1 | 1 |
| LeukotrieneE4_byDPEP3_CYSLTR1 | 1 | | 1 | 1 | 1 |
| LTD4_byGGT1_CYSLTR1 | 1 | | 1 | 1 | 1 |
| LeukotrieneD4_byGGT1_CYSLTR1 | 1 | | 1 | 1 | 1 |
| LTC4_byLTC4S_CYSLTR1 | 1 | | 1 | 1 | 1 |
| LipoxinA4_byALOX12_CYSLTR1 | 1 | | 1 | 1 | 1 |
| LeukotrieneC4_byLTC4S_CYSLTR1 | 1 | | 1 | 1 | 1 |
| LipoxinA4_byALOX5_CYSLTR1 | 1 | | 1 | 1 | 1 |
| LeukotrieneE4_byDPEP1_CYSLTR2 | 1 | | 1 | 1 | 1 |
| LeukotrieneE4_byDPEP2_CYSLTR2 | 1 | | 1 | 1 | 1 |
| LeukotrieneE4_byDPEP3_CYSLTR2 | 1 | | 1 | 1 | 1 |
| LTD4_byGGT1_CYSLTR2 | 1 | | 1 | 1 | 1 |
| LeukotrieneD4_byGGT1_CYSLTR2 | 1 | | 1 | 1 | 1 |
| LTC4_byLTC4S_CYSLTR2 | 1 | | 1 | 1 | 1 |
| LeukotrieneC4_byLTC4S_CYSLTR2 | 1 | | 1 | 1 | 1 |
| LeukotrieneD4_byGGT1_GPR17 | 1 | | 1 | 1 | 1 |
| LeukotrieneB4_byLTA4H_GPR17 | 1 | | 1 | 1 | 1 |
| LeukotrieneC4_byLTC4S_GPR17 | 1 | | 1 | 1 | 1 |
| LeukotrieneB4_byLTA4H_LTB4R | 1 | | 1 | 1 | 1 |
| 12oxoLeukotrieneB4_byPTGR1_LTB4R | 1 | | 1 | 1 | 1 |
| LeukotrieneB4_byLTA4H_LTB4R2 | 1 | | 1 | 1 | 1 |
| 12oxoLeukotrieneB4_byPTGR1_LTB4R2 | 1 | | 1 | 1 | 1 |
| LTB_LTBR | 0 | | 0 | 1 | 1 |
| TNFSF14_LTBR | 0 | | 0 | 1 | 1 |
| 5SHpETE_byALOX5_OXER1 | 1 | | 1 | 1 | 1 |
| XCL1_XCR1 | 1 | | 1 | 1 | 1 |
| XCL2_XCR1 | 1 | | 1 | 1 | 1 |
| LPAR1_ADGRE5 | 1 | | 1 | 1 | 1 |
| LPAR2_ADGRE5 | 1 | | 1 | 1 | 1 |
| LPAR3_ADGRE5 | 1 | | 1 | 1 | 1 |
| THY1_ADGRE5 | 1 | | 1 | 1 | 1 |
| integrin_aVb1_complex_ADGRE5 | 1 | | 1 | 0 | 0 |
| integrin_aVb3_complex_ADGRE5 | 1 | | 1 | 1 | 1 |
| CD55_ADGRE5 | 0 | | 0 | 0 | 0 |
| SFTPD_ADGRE5 | 1 | | 1 | 1 | 1 |
| Melatonin_byASMT_MTNR1A | 1 | | 1 | 1 | 1 |
| Melatonin_byASMT_MTNR1B | 1 | | 1 | 1 | 1 |
| MDK_ALK | 1 | | 1 | 1 | 1 |
| PTN_ALK | 1 | | 1 | 1 | 1 |
| MDK_PTPRZ1 | 1 | | 1 | 1 | 1 |
| PTN_PTPRZ1 | 1 | | 1 | 1 | 1 |
| AMH_MIS_receptor_3 | 1 | | 1 | 1 | 1 |
| AMH_MIS_receptor_1 | 1 | | 1 | 1 | 1 |
| AMH_MIS_receptor_2 | 1 | | 1 | 1 | 1 |
| NECTIN3_PVR | 1 | | 1 | 1 | 1 |
| NTN1_DCC | 1 | | 1 | 1 | 1 |
| NTN1_DSCAM | 1 | | 1 | 1 | 1 |
| NTN1_UNC5B | 1 | | 1 | 1 | 1 |
| NTN4_UNC5B | 1 | | 1 | 1 | 1 |
| NTN1_UNC5C | 1 | | 1 | 1 | 1 |
| NTN4_UNC5D | 1 | | 1 | 1 | 1 |
| NRXN1_DAG1 | 1 | | 1 | 1 | 1 |
| NRXN2_DAG1 | 1 | | 1 | 1 | 1 |
| NMU_NMUR1 | 1 | | 1 | 1 | 1 |
| NPB_NPBWR1 | 1 | | 1 | 1 | 1 |
| NPW_NPBWR1 | 1 | | 1 | 1 | 1 |
| NPFF_NPFFR1 | 1 | | 1 | 1 | 1 |
| NPFF_NPFFR2 | 1 | | 1 | 1 | 1 |
| NPPA_NPR1 | 1 | | 1 | 1 | 1 |
| NTS_NTSR1 | 1 | | 1 | 1 | 1 |
| NRTN_RET_receptor_2 | 1 | | 1 | 1 | 1 |
| NTF3_NTRK3 | 1 | | 1 | 1 | 1 |
| PTPRS_NTRK3 | 1 | | 1 | 1 | 1 |
| NODAL_NODAL_receptor_IbIIa_TDGF1 | 1 | | 1 | 1 | 1 |
| NODAL_NODAL_receptor_IbIIb_TDGF1 | 1 | | 1 | 1 | 1 |
| NODAL_NODAL_receptor_IcIIb_TDGF1 | 1 | | 1 | 1 | 1 |
| CNTN1_NOTCH1 | 1 | | 1 | 1 | 1 |
| DLK1_NOTCH1 | 1 | | 1 | 1 | 1 |
| DLL1_NOTCH1 | 1 | | 1 | 1 | 1 |
| DLL3_NOTCH1 | 1 | | 1 | 1 | 1 |
| DLL4_NOTCH1 | 1 | | 1 | 1 | 1 |
| JAG1_NOTCH1 | 1 | | 1 | 1 | 1 |
| JAG2_NOTCH1 | 1 | | 1 | 1 | 1 |
| CNTN1_NOTCH2 | 1 | | 1 | 1 | 1 |
| DLK1_NOTCH2 | 1 | | 1 | 1 | 1 |
| DLL1_NOTCH2 | 1 | | 1 | 1 | 1 |
| DLL3_NOTCH2 | 1 | | 1 | 1 | 1 |
| DLL4_NOTCH2 | 1 | | 1 | 1 | 1 |
| JAG1_NOTCH2 | 1 | | 1 | 1 | 1 |
| JAG2_NOTCH2 | 1 | | 1 | 1 | 1 |
| CNTN1_MCAM | 1 | | 1 | 1 | 1 |
| CNTN1_NRCAM | 1 | | 1 | 1 | 1 |
| DLK1_NOTCH3 | 1 | | 1 | 1 | 1 |
| DLL1_NOTCH3 | 1 | | 1 | 1 | 1 |
| DLL3_NOTCH3 | 1 | | 1 | 1 | 1 |
| DLL4_NOTCH3 | 1 | | 1 | 1 | 1 |
| JAG1_NOTCH3 | 1 | | 1 | 1 | 1 |
| JAG2_NOTCH3 | 1 | | 1 | 1 | 1 |
| DLK1_NOTCH4 | 1 | | 1 | 1 | 1 |
| DLL1_NOTCH4 | 1 | | 1 | 1 | 1 |
| DLL3_NOTCH4 | 1 | | 1 | 1 | 1 |
| DLL4_NOTCH4 | 1 | | 1 | 1 | 1 |
| JAG1_NOTCH4 | 1 | | 1 | 1 | 1 |
| JAG2_NOTCH4 | 1 | | 1 | 1 | 1 |
| JAG1_CD46 | 1 | | 1 | 1 | 1 |
| JAG1_VASN | 1 | | 1 | 1 | 1 |
| JAG2_VASN | 1 | | 1 | 1 | 1 |
| OSM_LIFR | 1 | | 1 | 1 | 1 |
| LIF_LIFR | 1 | | 1 | 1 | 1 |
| OSM_OSMR | 1 | | 1 | 1 | 1 |
| b-Endorphin_byPOMC_OPRD1 | 1 | | 1 | 1 | 1 |
| b-Endorphin_byPOMC_OPRM1 | 1 | | 1 | 1 | 1 |
| HCRT_HCRTR1 | 1 | | 1 | 1 | 1 |
| HCRT_HCRTR2 | 1 | | 1 | 1 | 1 |
| OXT_AVPR1A | 1 | | 1 | 1 | 1 |
| AVP_AVPR1A | 1 | | 1 | 1 | 1 |
| OXT_AVPR1B | 1 | | 1 | 1 | 1 |
| AVP_AVPR1B | 1 | | 1 | 1 | 1 |
| OXT_AVPR2 | 1 | | 1 | 1 | 1 |
| AVP_AVPR2 | 1 | | 1 | 1 | 1 |
| OXT_OXTR | 1 | | 1 | 1 | 1 |
| AVP_OXTR | 1 | | 1 | 1 | 1 |
| PTH_PTH1R | 1 | | 1 | 1 | 1 |
| PTHLH_PTH1R | 1 | | 1 | 1 | 1 |
| PTH_PTH2R | 1 | | 1 | 1 | 1 |
| PTHLH_PTH2R | 1 | | 1 | 1 | 1 |
| ADCYAP1_ADCYAP1R1 | 1 | | 1 | 1 | 1 |
| VIP_ADCYAP1R1 | 1 | | 1 | 1 | 1 |
| ADCYAP1_VIPR1 | 1 | | 1 | 1 | 1 |
| SCT_VIPR1 | 1 | | 1 | 1 | 1 |
| VIP_VIPR1 | 1 | | 1 | 1 | 1 |
| ADCYAP1_VIPR2 | 1 | | 1 | 1 | 1 |
| SCT_VIPR2 | 1 | | 1 | 1 | 1 |
| VIP_VIPR2 | 1 | | 1 | 1 | 1 |
| PGF_FLT1 | 1 | | 1 | 1 | 1 |
| VEGFA_FLT1 | 1 | | 1 | 1 | 1 |
| VEGFB_FLT1 | 1 | | 1 | 1 | 1 |
| PGF_FLT1_complex | 1 | | 1 | 1 | 1 |
| VEGFA_FLT1_complex | 1 | | 1 | 1 | 1 |
| VEGFB_FLT1_complex | 1 | | 1 | 1 | 1 |
| PGF_NRP1 | 1 | | 1 | 1 | 1 |
| SEMA3A_NRP1 | 1 | | 1 | 1 | 1 |
| VEGFA_NRP1 | 1 | | 1 | 1 | 1 |
| VEGFB_NRP1 | 1 | | 1 | 1 | 1 |
| PGF_NRP2 | 1 | | 1 | 1 | 1 |
| SEMA3C_NRP2 | 1 | | 1 | 1 | 1 |
| SEMA3F_NRP2 | 1 | | 1 | 1 | 1 |
| VEGFA_NRP2 | 1 | | 1 | 1 | 1 |
| PLAU_PLAUR | 1 | | 1 | 1 | 1 |
| PDGFA_PDGFRA | 1 | | 1 | 1 | 1 |
| PDGFB_PDGFRA | 1 | | 1 | 1 | 1 |
| PDGFC_PDGFRA | 1 | | 1 | 1 | 1 |
| PDGFB_PDGFR_complex | 1 | | 1 | 1 | 1 |
| PDGFD_PDGFR_complex | 1 | | 1 | 1 | 1 |
| PDGFB_PDGFRB | 1 | | 1 | 1 | 1 |
| PDGFD_PDGFRB | 1 | | 1 | 1 | 1 |
| PODXL_SELL | 1 | | 1 | 1 | 1 |
| PODXL2_SELL | 1 | | 1 | 1 | 1 |
| SELPLG_SELL | 1 | | 1 | 1 | 1 |
| PODXL2_SELP | 1 | | 1 | 1 | 1 |
| SELPLG_SELP | 1 | | 1 | 1 | 1 |
| CD24_SELP | 1 | | 1 | 1 | 1 |
| PVR_CD226 | 1 | | 1 | 0 | 1 |
| PVR_CD96 | 1 | | 1 | 0 | 0 |
| GCG_GCGR | 1 | | 1 | 1 | 1 |
| GCG_GLP1R | 1 | | 1 | 1 | 1 |
| GCG_GLP2R | 1 | | 1 | 1 | 1 |
| PMCH_MCHR1 | 1 | | 1 | 1 | 1 |
| PMCH_MCHR2 | 1 | | 1 | 1 | 1 |
| NPY_NPY1R | 1 | | 1 | 1 | 1 |
| PPY_NPY1R | 1 | | 1 | 1 | 1 |
| PYY_NPY1R | 1 | | 1 | 1 | 1 |
| NPY_NPY5R | 1 | | 1 | 1 | 1 |
| PPY_NPY5R | 1 | | 1 | 1 | 1 |
| PYY_NPY5R | 1 | | 1 | 1 | 1 |
| Progesterone_byHSD3B1_CatSperChannel1b | 1 | | 1 | 1 | 1 |
| Progesterone_byHSD3B1_CatSperChannel1dg | 1 | | 1 | 1 | 1 |
| Progesterone_byHSD3B1_CatSperChannel2b | 1 | | 1 | 1 | 1 |
| Progesterone_byHSD3B1_CatSperChannel2dg | 1 | | 1 | 1 | 1 |
| Progesterone_byHSD3B1_CatSperChannel3b | 1 | | 1 | 1 | 1 |
| Progesterone_byHSD3B1_CatSperChannel3dg | 1 | | 1 | 1 | 1 |
| Progesterone_byHSD3B1_CatSperChannel4b | 1 | | 1 | 1 | 1 |
| Progesterone_byHSD3B1_CatSperChannel4dg | 1 | | 1 | 1 | 1 |
| GNRH1_GNRHR | 1 | | 1 | 1 | 1 |
| GNRH2_GNRHR | 1 | | 1 | 1 | 1 |
| NSMF_GNRHR | 1 | | 1 | 1 | 1 |
| PROK1_PROKR1 | 1 | | 1 | 1 | 1 |
| PROK2_PROKR1 | 1 | | 1 | 1 | 1 |
| PRL_PRLR | 1 | | 1 | 1 | 1 |
| RLN1_RXFP1 | 1 | | 1 | 1 | 1 |
| RLN2_RXFP1 | 1 | | 1 | 1 | 1 |
| RLN3_RXFP1 | 1 | | 1 | 1 | 1 |
| PSAP_GPR37 | 1 | | 1 | 1 | 1 |
| PSAP_GPR37L1 | 1 | | 1 | 1 | 1 |
| ProstaglandinF2a_byAKR1B1_PTGFR | 0 | | 0 | 1 | 1 |
| ProstaglandinD2_byAKR1C3_PTGFR | 1 | | 1 | 1 | 1 |
| ProstaglandinF2a_byCBR1_PTGFR | 1 | | 1 | 1 | 1 |
| ProstaglandinF2a_byPRXL2B_PTGFR | 1 | | 1 | 1 | 1 |
| ProstaglandinD2_byAKR1C3_PTGDR | 1 | | 1 | 0 | 1 |
| PGD2_byPTGDS_PTGDR | 1 | | 1 | 0 | 1 |
| ProstaglandinD2_byAKR1C3_PTGDR2 | 1 | | 1 | 1 | 1 |
| PGD2_byPTGDS_PTGDR2 | 1 | | 1 | 1 | 1 |
| ProstaglandinE2_byPTGES_PTGER1 | 1 | | 1 | 1 | 1 |
| ProstaglandinE2_byPTGES2_PTGER1 | 1 | | 1 | 1 | 1 |
| ProstaglandinE2_byPTGES3_PTGER1 | 1 | | 1 | 1 | 1 |
| ProstaglandinE2_byPTGES_PTGER2 | 1 | | 1 | 1 | 1 |
| ProstaglandinE2_byPTGES2_PTGER2 | 1 | | 1 | 0 | 0 |
| ProstaglandinE2_byPTGES3_PTGER2 | 1 | | 1 | 0 | 0 |
| ProstaglandinE2_byPTGES_PTGER3 | 1 | | 1 | 1 | 1 |
| ProstaglandinE2_byPTGES2_PTGER3 | 1 | | 1 | 1 | 1 |
| ProstaglandinE2_byPTGES3_PTGER3 | 1 | | 1 | 1 | 1 |
| ProstaglandinE2_byPTGES_PTGER4 | 1 | | 1 | 1 | 1 |
| ProstaglandinE2_byPTGES2_PTGER4 | 1 | | 1 | 0 | 0 |
| ProstaglandinE2_byPTGES3_PTGER4 | 1 | | 1 | 0 | 0 |
| WNT1_FZD8_LRP6 | 1 | | 1 | 1 | 1 |
| WNT10A_FZD8_LRP6 | 1 | | 1 | 1 | 1 |
| WNT11_FZD8_LRP6 | 1 | | 1 | 1 | 1 |
| WNT16_FZD8_LRP6 | 1 | | 1 | 1 | 1 |
| WNT2_FZD8_LRP6 | 1 | | 1 | 1 | 1 |
| WNT2B_FZD8_LRP6 | 1 | | 1 | 1 | 1 |
| WNT3_FZD8_LRP6 | 1 | | 1 | 1 | 1 |
| WNT3A_FZD8_LRP6 | 1 | | 1 | 1 | 1 |
| WNT4_FZD8_LRP6 | 1 | | 1 | 1 | 1 |
| WNT5A_FZD8_LRP6 | 1 | | 1 | 1 | 1 |
| WNT5B_FZD8_LRP6 | 1 | | 1 | 1 | 1 |
| WNT6_FZD8_LRP6 | 1 | | 1 | 1 | 1 |
| WNT7A_FZD8_LRP6 | 1 | | 1 | 1 | 1 |
| WNT7B_FZD8_LRP6 | 1 | | 1 | 1 | 1 |
| WNT8A_FZD8_LRP6 | 1 | | 1 | 1 | 1 |
| WNT8B_FZD8_LRP6 | 1 | | 1 | 1 | 1 |
| WNT9A_FZD8_LRP6 | 1 | | 1 | 1 | 1 |
| WNT9B_FZD8_LRP6 | 1 | | 1 | 1 | 1 |
| DKK1_Kremen1_LRP6 | 1 | | 1 | 1 | 1 |
| RSPO2_LGR4 | 1 | | 1 | 1 | 1 |
| RSPO3_LGR4 | 1 | | 1 | 1 | 1 |
| RSPO4_LGR4 | 1 | | 1 | 1 | 1 |
| RSPO2_LGR5 | 1 | | 1 | 1 | 1 |
| RSPO3_LGR5 | 1 | | 1 | 1 | 1 |
| RSPO4_LGR5 | 1 | | 1 | 1 | 1 |
| RSPO2_LGR6 | 1 | | 1 | 1 | 1 |
| RSPO3_LGR6 | 1 | | 1 | 1 | 1 |
| RSPO4_LGR6 | 1 | | 1 | 1 | 1 |
| RELN_LRP8 | 1 | | 1 | 1 | 1 |
| RELN_VLDLR | 1 | | 1 | 1 | 1 |
| atRetinoicAcid_byALDH1A1_RAreceptor_RARA | 1 | | 1 | 1 | 1 |
| atRetinoicAcid_byALDH1A2_RAreceptor_RARA | 1 | | 1 | 1 | 1 |
| atRetinoicAcid_byALDH1A3_RAreceptor_RARA | 1 | | 1 | 1 | 1 |
| atRetinoicAcid_byALDH1A1_RAreceptor_RARA_RXRA | 1 | | 1 | 1 | 1 |
| atRetinoicAcid_byALDH1A2_RAreceptor_RARA_RXRA | 1 | | 1 | 1 | 1 |
| atRetinoicAcid_byALDH1A3_RAreceptor_RARA_RXRA | 1 | | 1 | 1 | 1 |
| atRetinoicAcid_byALDH1A1_RAreceptor_RARB | 1 | | 1 | 1 | 1 |
| atRetinoicAcid_byALDH1A2_RAreceptor_RARB | 1 | | 1 | 1 | 1 |
| atRetinoicAcid_byALDH1A3_RAreceptor_RARB | 1 | | 1 | 1 | 1 |
| atRetinoicAcid_byALDH1A1_RAreceptor_RARB_RXRB | 1 | | 1 | 1 | 1 |
| atRetinoicAcid_byALDH1A2_RAreceptor_RARB_RXRB | 1 | | 1 | 1 | 1 |
| atRetinoicAcid_byALDH1A3_RAreceptor_RARB_RXRB | 1 | | 1 | 1 | 1 |
| atRetinoicAcid_byALDH1A1_RAreceptor_RARG | 1 | | 1 | 1 | 1 |
| atRetinoicAcid_byALDH1A2_RAreceptor_RARG | 1 | | 1 | 1 | 1 |
| atRetinoicAcid_byALDH1A3_RAreceptor_RARG | 1 | | 1 | 1 | 1 |
| atRetinoicAcid_byALDH1A1_RAreceptor_RARG_RXRG | 1 | | 1 | 1 | 1 |
| atRetinoicAcid_byALDH1A2_RAreceptor_RARG_RXRG | 1 | | 1 | 1 | 1 |
| atRetinoicAcid_byALDH1A3_RAreceptor_RARG_RXRG | 1 | | 1 | 1 | 1 |
| atRetinoicAcid_byALDH1A1_RAreceptor_RXRA | 1 | | 1 | 1 | 1 |
| atRetinoicAcid_byALDH1A2_RAreceptor_RXRA | 1 | | 1 | 1 | 1 |
| atRetinoicAcid_byALDH1A3_RAreceptor_RXRA | 1 | | 1 | 1 | 1 |
| atRetinoicAcid_byALDH1A1_RAreceptor_RXRB | 1 | | 1 | 1 | 1 |
| atRetinoicAcid_byALDH1A2_RAreceptor_RXRB | 1 | | 1 | 1 | 1 |
| atRetinoicAcid_byALDH1A3_RAreceptor_RXRB | 1 | | 1 | 1 | 1 |
| atRetinoicAcid_byALDH1A1_RAreceptor_RXRG | 1 | | 1 | 1 | 1 |
| atRetinoicAcid_byALDH1A2_RAreceptor_RXRG | 1 | | 1 | 1 | 1 |
| atRetinoicAcid_byALDH1A3_RAreceptor_RXRG | 1 | | 1 | 1 | 1 |
| atRetinoicAcid_byALDH1A1_RORB | 1 | | 1 | 1 | 1 |
| atRetinoicAcid_byALDH1A2_RORB | 1 | | 1 | 1 | 1 |
| atRetinoicAcid_byALDH1A3_RORB | 1 | | 1 | 1 | 1 |
| RARRES2_CMKLR1 | 1 | | 1 | 1 | 1 |
| RARRES2_GPR1 | 1 | | 1 | 1 | 1 |
| TAFA1_GPR1 | 1 | | 1 | 1 | 1 |
| SOSTDC1_LRP5 | 1 | | 1 | 1 | 1 |
| DKK1_LRP5 | 1 | | 1 | 1 | 1 |
| SOSTDC1_LRP6 | 1 | | 1 | 1 | 1 |
| DKK1_LRP6 | 1 | | 1 | 1 | 1 |
| DKK2_LRP6 | 1 | | 1 | 1 | 1 |
| SCT_SCTR | 1 | | 1 | 1 | 1 |
| VIP_SCTR | 1 | | 1 | 1 | 1 |
| SELE_GLG1 | 1 | | 1 | 1 | 1 |
| SEMA3A_PlexinA1_complex3 | 1 | | 1 | 1 | 1 |
| SEMA3A_PlexinA2_complex1 | 1 | | 1 | 1 | 1 |
| SEMA6A_PlexinA2_complex1 | 1 | | 1 | 1 | 1 |
| SEMA3A_PlexinA3_complex1 | 1 | | 1 | 1 | 1 |
| SEMA3A_PlexinA4_complex1 | 1 | | 1 | 1 | 1 |
| SEMA3E_PLXND1 | 1 | | 1 | 0 | 0 |
| SEMA4A_PLXND1 | 1 | | 1 | 1 | 1 |
| SEMA4C_PLXNB2 | 1 | | 1 | 1 | 1 |
| SEMA4D_PLXNB2 | 0 | | 0 | 1 | 1 |
| SEMA4G_PLXNB2 | 1 | | 1 | 1 | 1 |
| SEMA4D_CD72 | 1 | | 1 | 1 | 1 |
| SEMA4D_PLXNB1 | 0 | | 0 | 1 | 1 |
| SEMA4D_PTPRC | 1 | | 1 | 1 | 1 |
| SEMA4D_PLXNB3 | 1 | | 1 | 1 | 1 |
| SEMA5A_PLXNB3 | 1 | | 1 | 1 | 1 |
| SEMA6D_PlexinA1_complex1 | 1 | | 1 | 1 | 1 |
| SEMA6D_PlexinA1_complex2 | 1 | | 1 | 1 | 1 |
| SEMA7A_PLXNC1 | 1 | | 1 | 1 | 1 |
| 5-HT_byTPH1_and_SLC18A2_HTR1D | 1 | | 1 | 1 | 1 |
| 5-HT_byTPH2_and_SLC18A2_HTR1D | 1 | | 1 | 1 | 1 |
| 5-HT_byTPH1_and_SLC6A4_HTR1D | 1 | | 1 | 1 | 1 |
| 5-HT_byTPH2_and_SLC6A4_HTR1D | 1 | | 1 | 1 | 1 |
| SerotoninDopamin_byDDC_HTR1D | 1 | | 1 | 1 | 1 |
| 5-HT_byTPH1_and_SLC18A2_HTR1E | 1 | | 1 | 1 | 1 |
| 5-HT_byTPH2_and_SLC18A2_HTR1E | 1 | | 1 | 1 | 1 |
| 5-HT_byTPH1_and_SLC6A4_HTR1E | 1 | | 1 | 1 | 1 |
| 5-HT_byTPH2_and_SLC6A4_HTR1E | 1 | | 1 | 1 | 1 |
| SerotoninDopamin_byDDC_HTR1E | 1 | | 1 | 1 | 1 |
| 5-HT_byTPH1_and_SLC18A2_HTR2A | 1 | | 1 | 1 | 1 |
| 5-HT_byTPH2_and_SLC18A2_HTR2A | 1 | | 1 | 1 | 1 |
| 5-HT_byTPH1_and_SLC6A4_HTR2A | 1 | | 1 | 1 | 1 |
| 5-HT_byTPH2_and_SLC6A4_HTR2A | 1 | | 1 | 1 | 1 |
| SerotoninDopamin_byDDC_HTR2A | 1 | | 1 | 1 | 1 |
| 5-HT_byTPH1_and_SLC18A2_HTR2B | 1 | | 1 | 1 | 1 |
| 5-HT_byTPH2_and_SLC18A2_HTR2B | 1 | | 1 | 1 | 1 |
| 5-HT_byTPH1_and_SLC6A4_HTR2B | 1 | | 1 | 1 | 1 |
| 5-HT_byTPH2_and_SLC6A4_HTR2B | 1 | | 1 | 1 | 1 |
| SerotoninDopamin_byDDC_HTR2B | 1 | | 1 | 1 | 1 |
| 5-HT_byTPH1_and_SLC18A2_HTR2C | 1 | | 1 | 1 | 1 |
| 5-HT_byTPH2_and_SLC18A2_HTR2C | 1 | | 1 | 1 | 1 |
| 5-HT_byTPH1_and_SLC6A4_HTR2C | 1 | | 1 | 1 | 1 |
| 5-HT_byTPH2_and_SLC6A4_HTR2C | 1 | | 1 | 1 | 1 |
| SerotoninDopamin_byDDC_HTR2C | 1 | | 1 | 1 | 1 |
| 5-HT_byTPH1_and_SLC18A2_HTR4 | 1 | | 1 | 1 | 1 |
| 5-HT_byTPH2_and_SLC18A2_HTR4 | 1 | | 1 | 1 | 1 |
| 5-HT_byTPH1_and_SLC6A4_HTR4 | 1 | | 1 | 1 | 1 |
| 5-HT_byTPH2_and_SLC6A4_HTR4 | 1 | | 1 | 1 | 1 |
| SerotoninDopamin_byDDC_HTR4 | 1 | | 1 | 1 | 1 |
| 5-HT_byTPH1_and_SLC18A2_HTR5A | 1 | | 1 | 1 | 1 |
| 5-HT_byTPH2_and_SLC18A2_HTR5A | 1 | | 1 | 1 | 1 |
| 5-HT_byTPH1_and_SLC6A4_HTR5A | 1 | | 1 | 1 | 1 |
| 5-HT_byTPH2_and_SLC6A4_HTR5A | 1 | | 1 | 1 | 1 |
| SerotoninDopamin_byDDC_HTR5A | 1 | | 1 | 1 | 1 |
| 5-HT_byTPH1_and_SLC18A2_HTR6 | 1 | | 1 | 1 | 1 |
| 5-HT_byTPH2_and_SLC18A2_HTR6 | 1 | | 1 | 1 | 1 |
| 5-HT_byTPH1_and_SLC6A4_HTR6 | 1 | | 1 | 1 | 1 |
| 5-HT_byTPH2_and_SLC6A4_HTR6 | 1 | | 1 | 1 | 1 |
| SerotoninDopamin_byDDC_HTR6 | 1 | | 1 | 1 | 1 |
| 5-HT_byTPH1_and_SLC18A2_HTR7 | 1 | | 1 | 1 | 1 |
| 5-HT_byTPH2_and_SLC18A2_HTR7 | 1 | | 1 | 1 | 1 |
| 5-HT_byTPH1_and_SLC6A4_HTR7 | 1 | | 1 | 1 | 1 |
| 5-HT_byTPH2_and_SLC6A4_HTR7 | 1 | | 1 | 1 | 1 |
| SerotoninDopamin_byDDC_HTR7 | 1 | | 1 | 1 | 1 |
| SerotoninDopamin_byDDC_DRD1 | 1 | | 1 | 1 | 1 |
| Dopamine_byDDC_and_SLC18A2_DRD1 | 1 | | 1 | 1 | 1 |
| Dopamine_byDDC_and_SLC6A3_DRD1 | 1 | | 1 | 1 | 1 |
| SerotoninDopamin_byDDC_DRD3 | 1 | | 1 | 1 | 1 |
| Dopamine_byDDC_and_SLC18A2_DRD3 | 1 | | 1 | 1 | 1 |
| Dopamine_byDDC_and_SLC6A3_DRD3 | 1 | | 1 | 1 | 1 |
| SerotoninDopamin_byDDC_DRD4 | 1 | | 1 | 1 | 1 |
| Dopamine_byDDC_and_SLC18A2_DRD4 | 1 | | 1 | 1 | 1 |
| Dopamine_byDDC_and_SLC6A3_DRD4 | 1 | | 1 | 1 | 1 |
| SerotoninDopamin_byDDC_HTR3A | 1 | | 1 | 1 | 1 |
| SerotoninDopamin_byDDC_HTR3B | 1 | | 1 | 1 | 1 |
| SerotoninDopamin_byDDC_HTR3E | 1 | | 1 | 1 | 1 |
| b-PEA_byDDC_TAAR1 | 1 | | 1 | 1 | 1 |
| SLIT1_ROBO1 | 1 | | 1 | 1 | 1 |
| SLIT2_ROBO1 | 1 | | 1 | 1 | 1 |
| SLIT2_ROBO2 | 1 | | 1 | 1 | 1 |
| CORT_SSTR1 | 1 | | 1 | 1 | 1 |
| CORT_SSTR2 | 1 | | 1 | 1 | 1 |
| CORT_SSTR3 | 1 | | 1 | 1 | 1 |
| CORT_SSTR5 | 1 | | 1 | 1 | 1 |
| GH2_GHR | 1 | | 1 | 1 | 1 |
| SHH_PTCH2_BOC_transmembrane_receptor | 1 | | 1 | 1 | 1 |
| SHH_PTCH2_CDON_transmembrane_receptor | 1 | | 1 | 1 | 1 |
| SHH_PTCH2_GAS1_transmembrane_receptor | 1 | | 1 | 1 | 1 |
| SDC1_ADGRA2 | 1 | | 1 | 1 | 1 |
| SDC2_ADGRA2 | 1 | | 1 | 1 | 1 |
| integrin_aVb3_complex_ADGRA2 | 1 | | 1 | 1 | 1 |
| TAC3_TACR1 | 1 | | 1 | 1 | 1 |
| TAC3_TACR2 | 1 | | 1 | 1 | 1 |
| TAC3_TACR3 | 1 | | 1 | 1 | 1 |
| TAFA5_S1PR2 | 1 | | 1 | 1 | 1 |
| TAX1BP3_ADGRB1 | 1 | | 1 | 1 | 1 |
| integrin_aVb5_complex_ADGRB1 | 1 | | 1 | 1 | 1 |
| RTN4R_ADGRB1 | 1 | | 1 | 1 | 1 |
| TAX1BP3_ADGRB2 | 1 | | 1 | 1 | 1 |
| ThromboxaneA2_byTBXAS1_TBXA2R | 1 | | 1 | 1 | 1 |
| THY1_ADGRE2 | 1 | | 1 | 1 | 1 |
| integrin_aVb1_complex_ADGRE2 | 1 | | 1 | 1 | 1 |
| integrin_aVb3_complex_ADGRE2 | 1 | | 1 | 1 | 1 |
| TF_TFR2 | 1 | | 1 | 1 | 1 |
| TF_TFRC | 1 | | 1 | 0 | 1 |
| HFE_TFRC | 1 | | 1 | 0 | 1 |
| TGFB1_TGFbeta_receptor2 | 0 | | 0 | 1 | 1 |
| TGFB2_TGFbeta_receptor2 | 1 | | 1 | 1 | 1 |
| TGFB3_TGFbeta_receptor2 | 1 | | 1 | 1 | 1 |
| TGFB1_TGFbeta_receptor1 | 0 | | 0 | 1 | 1 |
| TGFB2_TGFbeta_receptor1 | 1 | | 1 | 0 | 0 |
| TGFB3_TGFbeta_receptor1 | 1 | | 1 | 1 | 1 |
| TGFB1_TGFBR3 | 0 | | 0 | 1 | 1 |
| TGFB2_TGFBR3 | 1 | | 1 | 0 | 1 |
| TGFB3_TGFBR3 | 1 | | 1 | 1 | 1 |
| FGFR4_TGFBR3 | 1 | | 1 | 0 | 1 |
| TGFB3_integrin_aVb8_complex | 1 | | 1 | 1 | 1 |
| Triiodothyronine_byDIO3_THRA | 1 | | 1 | 1 | 1 |
| Triiodothyronine_byDIO3_THRB | 1 | | 1 | 1 | 1 |
| Lthyroxine_byTPO_THRB | 1 | | 1 | 1 | 1 |
| BTLA_TNFRSF14 | 1 | | 1 | 1 | 1 |
| CD160_TNFRSF14 | 0 | | 1 | 1 | 1 |
| LTA_TNFRSF14 | 0 | | 0 | 1 | 1 |
| TNFSF14_TNFRSF14 | 0 | | 0 | 1 | 1 |
| FASLG_FAS | 1 | | 1 | 1 | 1 |
| FASLG_TNFRSF6B | 1 | | 1 | 1 | 1 |
| TNFSF14_TNFRSF6B | 1 | | 1 | 1 | 1 |
| TNFSF15_TNFRSF6B | 1 | | 1 | 1 | 1 |
| LTA_TNFRSF1A | 0 | | 0 | 1 | 1 |
| TNF_TNFRSF1A | 0 | | 0 | 1 | 1 |
| LTA_TNFRSF1B | 1 | | 1 | 1 | 1 |
| TNF_TNFRSF1B | 1 | | 1 | 1 | 1 |
| TNFSF10_TNFRSF10A | 1 | | 1 | 1 | 1 |
| TNFSF10_TNFRSF10B | 1 | | 1 | 1 | 1 |
| TNFSF10_TNFRSF10C | 1 | | 1 | 1 | 1 |
| TNFSF10_TNFRSF10D | 1 | | 1 | 1 | 1 |
| TNFSF10_TNFRSF11B | 1 | | 1 | 1 | 1 |
| TNFSF11_TNFRSF11B | 1 | | 1 | 1 | 1 |
| TNFSF11_TNFRSF11A | 1 | | 1 | 1 | 1 |
| TNFSF12_TNFRSF12A | 0 | | 0 | 1 | 1 |
| TNFSF12_TNFRSF25 | 0 | | 0 | 0 | 0 |
| TNFSF15_TNFRSF25 | 1 | | 1 | 0 | 0 |
| TNFSF13_TNFRSF13B | 1 | | 1 | 1 | 1 |
| TNFSF13B_TNFRSF13B | 1 | | 1 | 1 | 1 |
| TNFSF13_TNFRSF17 | 1 | | 1 | 1 | 1 |
| TNFSF13B_TNFRSF17 | 1 | | 1 | 1 | 1 |
| TNFSF13B_TNFRSF13C | 1 | | 1 | 1 | 1 |
| TNFSF18_TNFRSF18 | 1 | | 1 | 1 | 1 |
| TNFSF4_TNFRSF4 | 1 | | 1 | 1 | 1 |
| TNFSF8_TNFRSF8 | 1 | | 1 | 1 | 1 |
| TNFSF9_TNFRSF9 | 1 | | 1 | 1 | 1 |
| VEGFA_KDR | 1 | | 1 | 1 | 1 |
| VEGFC_KDR | 1 | | 1 | 1 | 1 |
| VEGFD_KDR | 1 | | 1 | 1 | 1 |
| VEGFC_FLT4 | 1 | | 1 | 1 | 1 |
| VEGFD_FLT4 | 1 | | 1 | 1 | 1 |
| DKK1_Kremen2_LRP6 | 1 | | 1 | 1 | 1 |
| DKK2_Kremen2_LRP6 | 1 | | 1 | 1 | 1 |
| WNT1_FRZB | 1 | | 0 | 1 | 1 |
| WNT10A_FRZB | 1 | | 1 | 1 | 1 |
| WNT11_FRZB | 1 | | 1 | 1 | 1 |
| WNT16_FRZB | 1 | | 1 | 1 | 1 |
| WNT2_FRZB | 1 | | 1 | 1 | 1 |
| WNT2B_FRZB | 1 | | 1 | 1 | 1 |
| WNT3_FRZB | 1 | | 1 | 1 | 1 |
| WNT3A_FRZB | 1 | | 1 | 1 | 1 |
| WNT4_FRZB | 1 | | 1 | 1 | 1 |
| WNT5A_FRZB | 1 | | 1 | 1 | 1 |
| WNT5B_FRZB | 1 | | 1 | 1 | 1 |
| WNT6_FRZB | 1 | | 1 | 1 | 1 |
| WNT7A_FRZB | 1 | | 1 | 1 | 1 |
| WNT7B_FRZB | 1 | | 1 | 1 | 1 |
| WNT8A_FRZB | 1 | | 1 | 1 | 1 |
| WNT8B_FRZB | 1 | | 1 | 1 | 1 |
| WNT9A_FRZB | 1 | | 1 | 1 | 1 |
| WNT9B_FRZB | 1 | | 1 | 1 | 1 |
| WNT1_FZD1_LRP5 | 1 | | 0 | 1 | 1 |
| WNT10A_FZD1_LRP5 | 1 | | 1 | 1 | 1 |
| WNT11_FZD1_LRP5 | 1 | | 1 | 1 | 1 |
| WNT16_FZD1_LRP5 | 1 | | 1 | 1 | 1 |
| WNT2_FZD1_LRP5 | 1 | | 1 | 1 | 1 |
| WNT2B_FZD1_LRP5 | 1 | | 1 | 1 | 1 |
| WNT3_FZD1_LRP5 | 1 | | 1 | 1 | 1 |
| WNT3A_FZD1_LRP5 | 1 | | 1 | 1 | 1 |
| WNT4_FZD1_LRP5 | 1 | | 1 | 1 | 1 |
| WNT5B_FZD1_LRP5 | 1 | | 1 | 1 | 1 |
| WNT6_FZD1_LRP5 | 1 | | 1 | 1 | 1 |
| WNT7A_FZD1_LRP5 | 1 | | 1 | 1 | 1 |
| WNT7B_FZD1_LRP5 | 1 | | 1 | 1 | 1 |
| WNT8A_FZD1_LRP5 | 1 | | 1 | 1 | 1 |
| WNT8B_FZD1_LRP5 | 1 | | 1 | 1 | 1 |
| WNT9A_FZD1_LRP5 | 1 | | 1 | 1 | 1 |
| WNT9B_FZD1_LRP5 | 1 | | 1 | 1 | 1 |
| WNT1_FZD1_LRP6 | 1 | | 0 | 1 | 1 |
| WNT10A_FZD1_LRP6 | 1 | | 1 | 1 | 1 |
| WNT11_FZD1_LRP6 | 1 | | 1 | 1 | 1 |
| WNT16_FZD1_LRP6 | 1 | | 1 | 1 | 1 |
| WNT2_FZD1_LRP6 | 1 | | 1 | 1 | 1 |
| WNT2B_FZD1_LRP6 | 1 | | 1 | 1 | 1 |
| WNT3_FZD1_LRP6 | 1 | | 1 | 1 | 1 |
| WNT3A_FZD1_LRP6 | 1 | | 1 | 1 | 1 |
| WNT4_FZD1_LRP6 | 1 | | 1 | 1 | 1 |
| WNT5B_FZD1_LRP6 | 1 | | 1 | 1 | 1 |
| WNT6_FZD1_LRP6 | 1 | | 1 | 1 | 1 |
| WNT7A_FZD1_LRP6 | 1 | | 1 | 1 | 1 |
| WNT7B_FZD1_LRP6 | 1 | | 1 | 1 | 1 |
| WNT8A_FZD1_LRP6 | 1 | | 1 | 1 | 1 |
| WNT8B_FZD1_LRP6 | 1 | | 1 | 1 | 1 |
| WNT9A_FZD1_LRP6 | 1 | | 1 | 1 | 1 |
| WNT9B_FZD1_LRP6 | 1 | | 1 | 1 | 1 |
| WNT1_FZD10_LRP5 | 1 | | 1 | 1 | 1 |
| WNT11_FZD10_LRP5 | 1 | | 1 | 1 | 1 |
| WNT16_FZD10_LRP5 | 1 | | 1 | 1 | 1 |
| WNT2_FZD10_LRP5 | 1 | | 1 | 1 | 1 |
| WNT2B_FZD10_LRP5 | 1 | | 1 | 1 | 1 |
| WNT3_FZD10_LRP5 | 1 | | 1 | 1 | 1 |
| WNT3A_FZD10_LRP5 | 1 | | 1 | 1 | 1 |
| WNT4_FZD10_LRP5 | 1 | | 1 | 1 | 1 |
| WNT5A_FZD10_LRP5 | 1 | | 1 | 1 | 1 |
| WNT5B_FZD10_LRP5 | 1 | | 1 | 1 | 1 |
| WNT6_FZD10_LRP5 | 1 | | 1 | 1 | 1 |
| WNT7A_FZD10_LRP5 | 1 | | 1 | 1 | 1 |
| WNT7B_FZD10_LRP5 | 1 | | 1 | 1 | 1 |
| WNT8A_FZD10_LRP5 | 1 | | 1 | 1 | 1 |
| WNT8B_FZD10_LRP5 | 1 | | 1 | 1 | 1 |
| WNT9A_FZD10_LRP5 | 1 | | 1 | 1 | 1 |
| WNT9B_FZD10_LRP5 | 1 | | 1 | 1 | 1 |
| WNT1_FZD10_LRP6 | 1 | | 1 | 1 | 1 |
| WNT11_FZD10_LRP6 | 1 | | 1 | 1 | 1 |
| WNT16_FZD10_LRP6 | 1 | | 1 | 1 | 1 |
| WNT2_FZD10_LRP6 | 1 | | 1 | 1 | 1 |
| WNT2B_FZD10_LRP6 | 1 | | 1 | 1 | 1 |
| WNT3_FZD10_LRP6 | 1 | | 1 | 1 | 1 |
| WNT3A_FZD10_LRP6 | 1 | | 1 | 1 | 1 |
| WNT4_FZD10_LRP6 | 1 | | 1 | 1 | 1 |
| WNT5A_FZD10_LRP6 | 1 | | 1 | 1 | 1 |
| WNT5B_FZD10_LRP6 | 1 | | 1 | 1 | 1 |
| WNT6_FZD10_LRP6 | 1 | | 1 | 1 | 1 |
| WNT7A_FZD10_LRP6 | 1 | | 1 | 1 | 1 |
| WNT7B_FZD10_LRP6 | 1 | | 1 | 1 | 1 |
| WNT8A_FZD10_LRP6 | 1 | | 1 | 1 | 1 |
| WNT8B_FZD10_LRP6 | 1 | | 1 | 1 | 1 |
| WNT9A_FZD10_LRP6 | 1 | | 1 | 1 | 1 |
| WNT9B_FZD10_LRP6 | 1 | | 1 | 1 | 1 |
| WNT1_FZD2_LRP5 | 1 | | 1 | 1 | 1 |
| WNT11_FZD2_LRP5 | 1 | | 1 | 1 | 1 |
| WNT16_FZD2_LRP5 | 1 | | 1 | 1 | 1 |
| WNT2_FZD2_LRP5 | 1 | | 1 | 1 | 1 |
| WNT2B_FZD2_LRP5 | 1 | | 1 | 1 | 1 |
| WNT3_FZD2_LRP5 | 1 | | 1 | 1 | 1 |
| WNT3A_FZD2_LRP5 | 1 | | 1 | 1 | 1 |
| WNT4_FZD2_LRP5 | 1 | | 1 | 1 | 1 |
| WNT5A_FZD2_LRP5 | 1 | | 1 | 1 | 1 |
| WNT5B_FZD2_LRP5 | 1 | | 1 | 1 | 1 |
| WNT6_FZD2_LRP5 | 1 | | 1 | 1 | 1 |
| WNT7A_FZD2_LRP5 | 1 | | 1 | 1 | 1 |
| WNT7B_FZD2_LRP5 | 1 | | 1 | 1 | 1 |
| WNT8A_FZD2_LRP5 | 1 | | 1 | 1 | 1 |
| WNT8B_FZD2_LRP5 | 1 | | 1 | 1 | 1 |
| WNT9A_FZD2_LRP5 | 1 | | 1 | 1 | 1 |
| WNT9B_FZD2_LRP5 | 1 | | 1 | 1 | 1 |
| WNT1_FZD2_LRP6 | 1 | | 1 | 1 | 1 |
| WNT11_FZD2_LRP6 | 1 | | 1 | 1 | 1 |
| WNT16_FZD2_LRP6 | 1 | | 1 | 1 | 1 |
| WNT2_FZD2_LRP6 | 1 | | 1 | 1 | 1 |
| WNT2B_FZD2_LRP6 | 1 | | 1 | 1 | 1 |
| WNT3_FZD2_LRP6 | 1 | | 1 | 1 | 1 |
| WNT3A_FZD2_LRP6 | 1 | | 1 | 1 | 1 |
| WNT4_FZD2_LRP6 | 1 | | 1 | 1 | 1 |
| WNT5A_FZD2_LRP6 | 1 | | 1 | 1 | 1 |
| WNT5B_FZD2_LRP6 | 1 | | 1 | 1 | 1 |
| WNT6_FZD2_LRP6 | 1 | | 1 | 1 | 1 |
| WNT7A_FZD2_LRP6 | 1 | | 1 | 1 | 1 |
| WNT7B_FZD2_LRP6 | 1 | | 1 | 1 | 1 |
| WNT8A_FZD2_LRP6 | 1 | | 1 | 1 | 1 |
| WNT8B_FZD2_LRP6 | 1 | | 1 | 1 | 1 |
| WNT9A_FZD2_LRP6 | 1 | | 1 | 1 | 1 |
| WNT9B_FZD2_LRP6 | 1 | | 1 | 1 | 1 |
| WNT1_FZD3_LRP5 | 1 | | 1 | 1 | 1 |
| WNT11_FZD3_LRP5 | 1 | | 1 | 1 | 1 |
| WNT16_FZD3_LRP5 | 1 | | 1 | 1 | 1 |
| WNT2_FZD3_LRP5 | 1 | | 1 | 1 | 1 |
| WNT2B_FZD3_LRP5 | 1 | | 1 | 1 | 1 |
| WNT3_FZD3_LRP5 | 1 | | 1 | 1 | 1 |
| WNT3A_FZD3_LRP5 | 1 | | 1 | 1 | 1 |
| WNT4_FZD3_LRP5 | 1 | | 1 | 1 | 1 |
| WNT5A_FZD3_LRP5 | 1 | | 1 | 1 | 1 |
| WNT5B_FZD3_LRP5 | 1 | | 1 | 1 | 1 |
| WNT6_FZD3_LRP5 | 1 | | 1 | 1 | 1 |
| WNT7A_FZD3_LRP5 | 1 | | 1 | 1 | 1 |
| WNT7B_FZD3_LRP5 | 1 | | 1 | 1 | 1 |
| WNT8A_FZD3_LRP5 | 1 | | 1 | 1 | 1 |
| WNT8B_FZD3_LRP5 | 1 | | 1 | 1 | 1 |
| WNT9A_FZD3_LRP5 | 1 | | 1 | 1 | 1 |
| WNT9B_FZD3_LRP5 | 1 | | 1 | 1 | 1 |
| WNT1_FZD3_LRP6 | 1 | | 1 | 1 | 1 |
| WNT11_FZD3_LRP6 | 1 | | 1 | 1 | 1 |
| WNT16_FZD3_LRP6 | 1 | | 1 | 1 | 1 |
| WNT2_FZD3_LRP6 | 1 | | 1 | 1 | 1 |
| WNT2B_FZD3_LRP6 | 1 | | 1 | 1 | 1 |
| WNT3_FZD3_LRP6 | 1 | | 1 | 1 | 1 |
| WNT3A_FZD3_LRP6 | 1 | | 1 | 1 | 1 |
| WNT4_FZD3_LRP6 | 1 | | 1 | 1 | 1 |
| WNT5A_FZD3_LRP6 | 1 | | 1 | 1 | 1 |
| WNT5B_FZD3_LRP6 | 1 | | 1 | 1 | 1 |
| WNT6_FZD3_LRP6 | 1 | | 1 | 1 | 1 |
| WNT7A_FZD3_LRP6 | 1 | | 1 | 1 | 1 |
| WNT7B_FZD3_LRP6 | 1 | | 1 | 1 | 1 |
| WNT8A_FZD3_LRP6 | 1 | | 1 | 1 | 1 |
| WNT8B_FZD3_LRP6 | 1 | | 1 | 1 | 1 |
| WNT9A_FZD3_LRP6 | 1 | | 1 | 1 | 1 |
| WNT9B_FZD3_LRP6 | 1 | | 1 | 1 | 1 |
| WNT1_FZD4_LRP5 | 1 | | 0 | 1 | 1 |
| WNT11_FZD4_LRP5 | 1 | | 1 | 1 | 1 |
| WNT16_FZD4_LRP5 | 1 | | 1 | 1 | 1 |
| WNT2_FZD4_LRP5 | 1 | | 1 | 1 | 1 |
| WNT2B_FZD4_LRP5 | 1 | | 1 | 1 | 1 |
| WNT3_FZD4_LRP5 | 1 | | 1 | 1 | 1 |
| WNT3A_FZD4_LRP5 | 1 | | 1 | 1 | 1 |
| WNT4_FZD4_LRP5 | 1 | | 1 | 1 | 1 |
| WNT5A_FZD4_LRP5 | 1 | | 1 | 1 | 1 |
| WNT5B_FZD4_LRP5 | 1 | | 1 | 1 | 1 |
| WNT6_FZD4_LRP5 | 1 | | 1 | 1 | 1 |
| WNT7A_FZD4_LRP5 | 1 | | 1 | 1 | 1 |
| WNT7B_FZD4_LRP5 | 1 | | 1 | 1 | 1 |
| WNT8A_FZD4_LRP5 | 1 | | 1 | 1 | 1 |
| WNT8B_FZD4_LRP5 | 1 | | 1 | 1 | 1 |
| WNT9A_FZD4_LRP5 | 1 | | 1 | 1 | 1 |
| WNT9B_FZD4_LRP5 | 1 | | 1 | 1 | 1 |
| NDP_FZD4_LRP5 | 1 | | 1 | 1 | 1 |
| WNT1_FZD4_LRP6 | 1 | | 0 | 1 | 1 |
| WNT11_FZD4_LRP6 | 1 | | 1 | 1 | 1 |
| WNT16_FZD4_LRP6 | 1 | | 1 | 1 | 1 |
| WNT2_FZD4_LRP6 | 1 | | 1 | 1 | 1 |
| WNT2B_FZD4_LRP6 | 1 | | 1 | 1 | 1 |
| WNT3_FZD4_LRP6 | 1 | | 1 | 1 | 1 |
| WNT3A_FZD4_LRP6 | 1 | | 1 | 1 | 1 |
| WNT4_FZD4_LRP6 | 1 | | 1 | 1 | 1 |
| WNT5A_FZD4_LRP6 | 1 | | 1 | 1 | 1 |
| WNT5B_FZD4_LRP6 | 1 | | 1 | 1 | 1 |
| WNT6_FZD4_LRP6 | 1 | | 1 | 1 | 1 |
| WNT7A_FZD4_LRP6 | 1 | | 1 | 1 | 1 |
| WNT7B_FZD4_LRP6 | 1 | | 1 | 1 | 1 |
| WNT8A_FZD4_LRP6 | 1 | | 1 | 1 | 1 |
| WNT8B_FZD4_LRP6 | 1 | | 1 | 1 | 1 |
| WNT9A_FZD4_LRP6 | 1 | | 1 | 1 | 1 |
| WNT9B_FZD4_LRP6 | 1 | | 1 | 1 | 1 |
| WNT1_FZD5_LRP5 | 1 | | 0 | 1 | 1 |
| WNT10A_FZD5_LRP5 | 1 | | 1 | 1 | 1 |
| WNT11_FZD5_LRP5 | 1 | | 1 | 1 | 1 |
| WNT16_FZD5_LRP5 | 1 | | 1 | 1 | 1 |
| WNT2_FZD5_LRP5 | 1 | | 1 | 1 | 1 |
| WNT2B_FZD5_LRP5 | 1 | | 1 | 1 | 1 |
| WNT3_FZD5_LRP5 | 1 | | 1 | 1 | 1 |
| WNT3A_FZD5_LRP5 | 1 | | 1 | 1 | 1 |
| WNT4_FZD5_LRP5 | 1 | | 1 | 1 | 1 |
| WNT5A_FZD5_LRP5 | 1 | | 1 | 1 | 1 |
| WNT5B_FZD5_LRP5 | 1 | | 1 | 1 | 1 |
| WNT6_FZD5_LRP5 | 1 | | 1 | 1 | 1 |
| WNT7A_FZD5_LRP5 | 1 | | 1 | 1 | 1 |
| WNT7B_FZD5_LRP5 | 1 | | 1 | 1 | 1 |
| WNT8A_FZD5_LRP5 | 1 | | 1 | 1 | 1 |
| WNT8B_FZD5_LRP5 | 1 | | 1 | 1 | 1 |
| WNT9A_FZD5_LRP5 | 1 | | 1 | 1 | 1 |
| WNT9B_FZD5_LRP5 | 1 | | 1 | 1 | 1 |
| WNT1_FZD5_LRP6 | 1 | | 0 | 1 | 1 |
| WNT10A_FZD5_LRP6 | 1 | | 1 | 1 | 1 |
| WNT11_FZD5_LRP6 | 1 | | 1 | 1 | 1 |
| WNT16_FZD5_LRP6 | 1 | | 1 | 1 | 1 |
| WNT2_FZD5_LRP6 | 1 | | 1 | 1 | 1 |
| WNT2B_FZD5_LRP6 | 1 | | 1 | 1 | 1 |
| WNT3_FZD5_LRP6 | 1 | | 1 | 1 | 1 |
| WNT3A_FZD5_LRP6 | 1 | | 1 | 1 | 1 |
| WNT4_FZD5_LRP6 | 1 | | 1 | 1 | 1 |
| WNT5A_FZD5_LRP6 | 1 | | 1 | 1 | 1 |
| WNT5B_FZD5_LRP6 | 1 | | 1 | 1 | 1 |
| WNT6_FZD5_LRP6 | 1 | | 1 | 1 | 1 |
| WNT7A_FZD5_LRP6 | 1 | | 1 | 1 | 1 |
| WNT7B_FZD5_LRP6 | 1 | | 1 | 1 | 1 |
| WNT8A_FZD5_LRP6 | 1 | | 1 | 1 | 1 |
| WNT8B_FZD5_LRP6 | 1 | | 1 | 1 | 1 |
| WNT9A_FZD5_LRP6 | 1 | | 1 | 1 | 1 |
| WNT9B_FZD5_LRP6 | 1 | | 1 | 1 | 1 |
| WNT1_FZD6_LRP5 | 1 | | 0 | 1 | 1 |
| WNT11_FZD6_LRP5 | 1 | | 1 | 1 | 1 |
| WNT16_FZD6_LRP5 | 1 | | 1 | 1 | 1 |
| WNT2_FZD6_LRP5 | 1 | | 1 | 1 | 1 |
| WNT2B_FZD6_LRP5 | 1 | | 1 | 1 | 1 |
| WNT3_FZD6_LRP5 | 1 | | 1 | 1 | 1 |
| WNT3A_FZD6_LRP5 | 1 | | 1 | 1 | 1 |
| WNT4_FZD6_LRP5 | 1 | | 1 | 1 | 1 |
| WNT5A_FZD6_LRP5 | 1 | | 1 | 1 | 1 |
| WNT5B_FZD6_LRP5 | 1 | | 1 | 1 | 1 |
| WNT6_FZD6_LRP5 | 1 | | 1 | 1 | 1 |
| WNT7A_FZD6_LRP5 | 1 | | 1 | 1 | 1 |
| WNT7B_FZD6_LRP5 | 1 | | 1 | 1 | 1 |
| WNT8A_FZD6_LRP5 | 1 | | 1 | 1 | 1 |
| WNT8B_FZD6_LRP5 | 1 | | 1 | 1 | 1 |
| WNT9A_FZD6_LRP5 | 1 | | 1 | 1 | 1 |
| WNT9B_FZD6_LRP5 | 1 | | 1 | 1 | 1 |
| WNT1_FZD6_LRP6 | 1 | | 0 | 1 | 1 |
| WNT11_FZD6_LRP6 | 1 | | 1 | 1 | 1 |
| WNT16_FZD6_LRP6 | 1 | | 1 | 1 | 1 |
| WNT2_FZD6_LRP6 | 1 | | 1 | 1 | 1 |
| WNT2B_FZD6_LRP6 | 1 | | 1 | 1 | 1 |
| WNT3_FZD6_LRP6 | 1 | | 1 | 1 | 1 |
| WNT3A_FZD6_LRP6 | 1 | | 1 | 1 | 1 |
| WNT4_FZD6_LRP6 | 1 | | 1 | 1 | 1 |
| WNT5A_FZD6_LRP6 | 1 | | 1 | 1 | 1 |
| WNT5B_FZD6_LRP6 | 1 | | 1 | 1 | 1 |
| WNT6_FZD6_LRP6 | 1 | | 1 | 1 | 1 |
| WNT7A_FZD6_LRP6 | 1 | | 1 | 1 | 1 |
| WNT7B_FZD6_LRP6 | 1 | | 1 | 1 | 1 |
| WNT8A_FZD6_LRP6 | 1 | | 1 | 1 | 1 |
| WNT8B_FZD6_LRP6 | 1 | | 1 | 1 | 1 |
| WNT9A_FZD6_LRP6 | 1 | | 1 | 1 | 1 |
| WNT9B_FZD6_LRP6 | 1 | | 1 | 1 | 1 |
| WNT1_FZD7_LRP5 | 1 | | 1 | 1 | 1 |
| WNT10A_FZD7_LRP5 | 1 | | 1 | 1 | 1 |
| WNT11_FZD7_LRP5 | 1 | | 1 | 1 | 1 |
| WNT16_FZD7_LRP5 | 1 | | 1 | 1 | 1 |
| WNT2_FZD7_LRP5 | 1 | | 1 | 1 | 1 |
| WNT2B_FZD7_LRP5 | 1 | | 1 | 1 | 1 |
| WNT3_FZD7_LRP5 | 1 | | 1 | 1 | 1 |
| WNT3A_FZD7_LRP5 | 1 | | 1 | 1 | 1 |
| WNT4_FZD7_LRP5 | 1 | | 1 | 1 | 1 |
| WNT5A_FZD7_LRP5 | 1 | | 1 | 1 | 1 |
| WNT5B_FZD7_LRP5 | 1 | | 1 | 1 | 1 |
| WNT6_FZD7_LRP5 | 1 | | 1 | 1 | 1 |
| WNT7A_FZD7_LRP5 | 1 | | 1 | 1 | 1 |
| WNT7B_FZD7_LRP5 | 1 | | 1 | 1 | 1 |
| WNT8A_FZD7_LRP5 | 1 | | 1 | 1 | 1 |
| WNT8B_FZD7_LRP5 | 1 | | 1 | 1 | 1 |
| WNT9A_FZD7_LRP5 | 1 | | 1 | 1 | 1 |
| WNT9B_FZD7_LRP5 | 1 | | 1 | 1 | 1 |
| WNT1_FZD7_LRP6 | 1 | | 1 | 1 | 1 |
| WNT10A_FZD7_LRP6 | 1 | | 1 | 1 | 1 |
| WNT11_FZD7_LRP6 | 1 | | 1 | 1 | 1 |
| WNT16_FZD7_LRP6 | 1 | | 1 | 1 | 1 |
| WNT2_FZD7_LRP6 | 1 | | 1 | 1 | 1 |
| WNT2B_FZD7_LRP6 | 1 | | 1 | 1 | 1 |
| WNT3_FZD7_LRP6 | 1 | | 1 | 1 | 1 |
| WNT3A_FZD7_LRP6 | 1 | | 1 | 1 | 1 |
| WNT4_FZD7_LRP6 | 1 | | 1 | 1 | 1 |
| WNT5A_FZD7_LRP6 | 1 | | 1 | 1 | 1 |
| WNT5B_FZD7_LRP6 | 1 | | 1 | 1 | 1 |
| WNT6_FZD7_LRP6 | 1 | | 1 | 1 | 1 |
| WNT7A_FZD7_LRP6 | 1 | | 1 | 1 | 1 |
| WNT7B_FZD7_LRP6 | 1 | | 1 | 1 | 1 |
| WNT8A_FZD7_LRP6 | 1 | | 1 | 1 | 1 |
| WNT8B_FZD7_LRP6 | 1 | | 1 | 1 | 1 |
| WNT9A_FZD7_LRP6 | 1 | | 1 | 1 | 1 |
| WNT9B_FZD7_LRP6 | 1 | | 1 | 1 | 1 |
| WNT1_FZD8_LRP5 | 1 | | 1 | 1 | 1 |
| WNT10A_FZD8_LRP5 | 1 | | 1 | 1 | 1 |
| WNT11_FZD8_LRP5 | 1 | | 1 | 1 | 1 |
| WNT16_FZD8_LRP5 | 1 | | 1 | 1 | 1 |
| WNT2_FZD8_LRP5 | 1 | | 1 | 1 | 1 |
| WNT2B_FZD8_LRP5 | 1 | | 1 | 1 | 1 |
| WNT3_FZD8_LRP5 | 1 | | 1 | 1 | 1 |
| WNT3A_FZD8_LRP5 | 1 | | 1 | 1 | 1 |
| WNT4_FZD8_LRP5 | 1 | | 1 | 1 | 1 |
| WNT5A_FZD8_LRP5 | 1 | | 1 | 1 | 1 |
| WNT5B_FZD8_LRP5 | 1 | | 1 | 1 | 1 |
| WNT6_FZD8_LRP5 | 1 | | 1 | 1 | 1 |
| WNT7A_FZD8_LRP5 | 1 | | 1 | 1 | 1 |
| WNT7B_FZD8_LRP5 | 1 | | 1 | 1 | 1 |
| WNT8A_FZD8_LRP5 | 1 | | 1 | 1 | 1 |
| WNT8B_FZD8_LRP5 | 1 | | 1 | 1 | 1 |
| WNT9A_FZD8_LRP5 | 1 | | 1 | 1 | 1 |
| WNT9B_FZD8_LRP5 | 1 | | 1 | 1 | 1 |
| WNT1_FDZ8_RYK | 1 | | 1 | 1 | 1 |
| WNT3_FDZ8_RYK | 1 | | 1 | 1 | 1 |
| WNT3A_FDZ8_RYK | 1 | | 1 | 1 | 1 |
| WNT5A_FDZ8_RYK | 1 | | 1 | 1 | 1 |
| WNT1_FZD9_LRP5 | 1 | | 1 | 1 | 1 |
| WNT11_FZD9_LRP5 | 1 | | 1 | 1 | 1 |
| WNT16_FZD9_LRP5 | 1 | | 1 | 1 | 1 |
| WNT2_FZD9_LRP5 | 1 | | 1 | 1 | 1 |
| WNT2B_FZD9_LRP5 | 1 | | 1 | 1 | 1 |
| WNT3_FZD9_LRP5 | 1 | | 1 | 1 | 1 |
| WNT3A_FZD9_LRP5 | 1 | | 1 | 1 | 1 |
| WNT4_FZD9_LRP5 | 1 | | 1 | 1 | 1 |
| WNT5A_FZD9_LRP5 | 1 | | 1 | 1 | 1 |
| WNT5B_FZD9_LRP5 | 1 | | 1 | 1 | 1 |
| WNT6_FZD9_LRP5 | 1 | | 1 | 1 | 1 |
| WNT7A_FZD9_LRP5 | 1 | | 1 | 1 | 1 |
| WNT7B_FZD9_LRP5 | 1 | | 1 | 1 | 1 |
| WNT8A_FZD9_LRP5 | 1 | | 1 | 1 | 1 |
| WNT8B_FZD9_LRP5 | 1 | | 1 | 1 | 1 |
| WNT9A_FZD9_LRP5 | 1 | | 1 | 1 | 1 |
| WNT9B_FZD9_LRP5 | 1 | | 1 | 1 | 1 |
| WNT1_FZD9_LRP6 | 1 | | 1 | 1 | 1 |
| WNT11_FZD9_LRP6 | 1 | | 1 | 1 | 1 |
| WNT16_FZD9_LRP6 | 1 | | 1 | 1 | 1 |
| WNT2_FZD9_LRP6 | 1 | | 1 | 1 | 1 |
| WNT2B_FZD9_LRP6 | 1 | | 1 | 1 | 1 |
| WNT3_FZD9_LRP6 | 1 | | 1 | 1 | 1 |
| WNT3A_FZD9_LRP6 | 1 | | 1 | 1 | 1 |
| WNT4_FZD9_LRP6 | 1 | | 1 | 1 | 1 |
| WNT5A_FZD9_LRP6 | 1 | | 1 | 1 | 1 |
| WNT5B_FZD9_LRP6 | 1 | | 1 | 1 | 1 |
| WNT6_FZD9_LRP6 | 1 | | 1 | 1 | 1 |
| WNT7A_FZD9_LRP6 | 1 | | 1 | 1 | 1 |
| WNT7B_FZD9_LRP6 | 1 | | 1 | 1 | 1 |
| WNT8A_FZD9_LRP6 | 1 | | 1 | 1 | 1 |
| WNT8B_FZD9_LRP6 | 1 | | 1 | 1 | 1 |
| WNT9A_FZD9_LRP6 | 1 | | 1 | 1 | 1 |
| WNT9B_FZD9_LRP6 | 1 | | 1 | 1 | 1 |
| WNT1_SFRP2 | 1 | | 1 | 1 | 1 |
| WNT11_SFRP2 | 1 | | 1 | 1 | 1 |
| WNT16_SFRP2 | 1 | | 1 | 1 | 1 |
| WNT2_SFRP2 | 1 | | 1 | 1 | 1 |
| WNT2B_SFRP2 | 1 | | 1 | 1 | 1 |
| WNT3_SFRP2 | 1 | | 1 | 1 | 1 |
| WNT3A_SFRP2 | 1 | | 1 | 1 | 1 |
| WNT4_SFRP2 | 1 | | 1 | 1 | 1 |
| WNT5A_SFRP2 | 1 | | 1 | 1 | 1 |
| WNT5B_SFRP2 | 1 | | 1 | 1 | 1 |
| WNT6_SFRP2 | 1 | | 1 | 1 | 1 |
| WNT7A_SFRP2 | 1 | | 1 | 1 | 1 |
| WNT7B_SFRP2 | 1 | | 1 | 1 | 1 |
| WNT8A_SFRP2 | 1 | | 1 | 1 | 1 |
| WNT8B_SFRP2 | 1 | | 1 | 1 | 1 |
| WNT9A_SFRP2 | 1 | | 1 | 1 | 1 |
| WNT9B_SFRP2 | 1 | | 1 | 1 | 1 |
| WNT1_SFRP4 | 1 | | 1 | 1 | 1 |
| WNT11_SFRP4 | 1 | | 1 | 1 | 1 |
| WNT16_SFRP4 | 1 | | 1 | 1 | 1 |
| WNT2_SFRP4 | 1 | | 1 | 1 | 1 |
| WNT2B_SFRP4 | 1 | | 1 | 1 | 1 |
| WNT3_SFRP4 | 1 | | 1 | 1 | 1 |
| WNT3A_SFRP4 | 1 | | 1 | 1 | 1 |
| WNT4_SFRP4 | 1 | | 1 | 1 | 1 |
| WNT5A_SFRP4 | 1 | | 1 | 1 | 1 |
| WNT5B_SFRP4 | 1 | | 1 | 1 | 1 |
| WNT6_SFRP4 | 1 | | 1 | 1 | 1 |
| WNT7A_SFRP4 | 1 | | 1 | 1 | 1 |
| WNT7B_SFRP4 | 1 | | 1 | 1 | 1 |
| WNT8A_SFRP4 | 1 | | 1 | 1 | 1 |
| WNT8B_SFRP4 | 1 | | 1 | 1 | 1 |
| WNT9A_SFRP4 | 1 | | 1 | 1 | 1 |
| WNT9B_SFRP4 | 1 | | 1 | 1 | 1 |
| WNT1_SFRP5 | 1 | | 0 | 1 | 1 |
| WNT11_SFRP5 | 1 | | 1 | 1 | 1 |
| WNT16_SFRP5 | 1 | | 1 | 1 | 1 |
| WNT2_SFRP5 | 1 | | 1 | 1 | 1 |
| WNT2B_SFRP5 | 1 | | 1 | 1 | 1 |
| WNT3_SFRP5 | 1 | | 1 | 1 | 1 |
| WNT3A_SFRP5 | 1 | | 1 | 1 | 1 |
| WNT4_SFRP5 | 1 | | 1 | 1 | 1 |
| WNT5A_SFRP5 | 1 | | 1 | 1 | 1 |
| WNT5B_SFRP5 | 1 | | 1 | 1 | 1 |
| WNT6_SFRP5 | 1 | | 1 | 1 | 1 |
| WNT7A_SFRP5 | 1 | | 1 | 1 | 1 |
| WNT7B_SFRP5 | 1 | | 1 | 1 | 1 |
| WNT8A_SFRP5 | 1 | | 1 | 1 | 1 |
| WNT8B_SFRP5 | 1 | | 1 | 1 | 1 |
| WNT9A_SFRP5 | 1 | | 1 | 1 | 1 |
| WNT9B_SFRP5 | 1 | | 1 | 1 | 1 |
| WNT1_WIF1 | 1 | | 1 | 1 | 1 |
| WNT11_WIF1 | 1 | | 1 | 1 | 1 |
| WNT16_WIF1 | 1 | | 1 | 1 | 1 |
| WNT2_WIF1 | 1 | | 1 | 1 | 1 |
| WNT2B_WIF1 | 1 | | 1 | 1 | 1 |
| WNT3_WIF1 | 1 | | 1 | 1 | 1 |
| WNT3A_WIF1 | 1 | | 1 | 1 | 1 |
| WNT4_WIF1 | 1 | | 1 | 1 | 1 |
| WNT5A_WIF1 | 1 | | 1 | 1 | 1 |
| WNT5B_WIF1 | 1 | | 1 | 1 | 1 |
| WNT6_WIF1 | 1 | | 1 | 1 | 1 |
| WNT7A_WIF1 | 1 | | 1 | 1 | 1 |
| WNT7B_WIF1 | 1 | | 1 | 1 | 1 |
| WNT8A_WIF1 | 1 | | 1 | 1 | 1 |
| WNT8B_WIF1 | 1 | | 1 | 1 | 1 |
| WNT9A_WIF1 | 1 | | 1 | 1 | 1 |
| WNT9B_WIF1 | 1 | | 1 | 1 | 1 |
| WNT5A_ROR1 | 1 | | 1 | 1 | 1 |
| WNT5A_ROR2 | 1 | | 1 | 1 | 1 |
| INHBC_ACVR2A | 1 | | 1 | 1 | 1 |
| INHBE_ACVR2A | 1 | | 1 | 1 | 1 |
| INHBC_ACVR2B | 1 | | 1 | 1 | 1 |
| INHBE_ACVR2B | 1 | | 1 | 1 | 1 |
| ARTN_RET_receptor_1 | 1 | | 1 | 1 | 1 |
| GDNF_RET_receptor_1 | 1 | | 1 | 1 | 1 |
| ARTN_RET_receptor_3 | 1 | | 1 | 1 | 1 |
| ADIPOQ_ADR_complex | 1 | | 1 | 1 | 1 |
| ALB_FcRn_complex | 1 | | 1 | 1 | 1 |
| ALCAM_CD6 | 1 | | 1 | 0 | 0 |
| CD1B_complex_IL6ST | 1 | | 1 | 1 | 1 |
| BAG6_NCR3 | 1 | | 1 | 0 | 0 |
| NCR3LG1_NCR3 | 1 | | 1 | 1 | 1 |
| BST2_LILRA4 | 1 | | 1 | 1 | 1 |
| NRXN1_CBLN1_complex_GRID2 | 1 | | 1 | 1 | 1 |
| CD200_CD200R1 | 1 | | 1 | 1 | 1 |
| CD226_NECTIN2 | 0 | | 1 | 1 | 1 |
| CD248_IL6R | 1 | | 1 | 1 | 1 |
| CD274_CD80 | 1 | | 1 | 1 | 1 |
| CD274_PDCD1 | 1 | | 1 | 1 | 1 |
| PDCD1LG2_PDCD1 | 1 | | 1 | 1 | 1 |
| CD276_TREML2 | 1 | | 1 | 1 | 1 |
| CD320_JAML | 1 | | 1 | 0 | 0 |
| CD40LG_CD40 | 0 | | 0 | 1 | 1 |
| CD44_TYROBP | 1 | | 1 | 1 | 1 |
| CD47_SIRB1_complex | 1 | | 1 | 1 | 1 |
| CD47_SIRPA | 0 | | 0 | 1 | 1 |
| CD47_SIRPG | 1 | | 1 | 0 | 0 |
| CD48_CD244 | 1 | | 1 | 1 | 1 |
| CD58_CD2 | 1 | | 1 | 0 | 0 |
| CD70_CD27 | 1 | | 1 | 1 | 1 |
| CD80_CD28 | 1 | | 1 | 1 | 1 |
| CD86_CD28 | 1 | | 1 | 1 | 1 |
| CD80_CTLA4 | 1 | | 1 | 1 | 1 |
| CD86_CTLA4 | 1 | | 1 | 1 | 1 |
| CD93_IFNGR1 | 1 | | 1 | 1 | 1 |
| CD96_NECTIN1 | 1 | | 1 | 1 | 1 |
| CD99_PILRA | 1 | | 1 | 1 | 1 |
| CHL1_CHL1 | 1 | | 1 | 1 | 1 |
| CLCF1_CNTF_1R | 1 | | 1 | 1 | 1 |
| CNTF_CNTF_1R | 1 | | 1 | 1 | 1 |
| CRLF2_TSLPR | 1 | | 1 | 1 | 1 |
| TSLP_TSLPR | 1 | | 1 | 1 | 1 |
| EPO_EPOR | 1 | | 1 | 1 | 1 |
| ERVH48-1_SLC1A5 | 1 | | 1 | 1 | 1 |
| ESAM_ESAM | 1 | | 1 | 1 | 1 |
| FLT3LG_FLT3 | 1 | | 1 | 1 | 1 |
| FTH1_SCARA5 | 1 | | 1 | 1 | 1 |
| FTL_SCARA5 | 1 | | 1 | 1 | 1 |
| HGF_MET | 1 | | 1 | 1 | 1 |
| ICOSLG_ICOS | 1 | | 1 | 1 | 1 |
| KISS1_KISS1R | 1 | | 1 | 1 | 1 |
| KITLG_KIT | 1 | | 1 | 1 | 1 |
| KLRB1_CLEC2D | 1 | | 1 | 1 | 1 |
| LAIR1_LILRB4 | 1 | | 1 | 1 | 1 |
| LCK_CD8_receptor | 1 | | 1 | 1 | 1 |
| LCN2_SLC22A17 | 1 | | 1 | 1 | 1 |
| MPZL1_MPZL1 | 1 | | 1 | 1 | 1 |
| MST1_MST1R | 1 | | 1 | 1 | 1 |
| NELL2_ROBO3 | 1 | | 1 | 1 | 1 |
| NXNL1_SLC16A1_complex | 1 | | 1 | 1 | 1 |
| PECAM1_CD38 | 1 | | 1 | 1 | 1 |
| PPIA_BSG | 1 | | 1 | 1 | 1 |
| PROC_PROCR | 1 | | 1 | 1 | 1 |
| Prostacyclin_byPTGIS_PTGIR | 1 | | 1 | 1 | 1 |
| PTPRC_CD22 | 1 | | 1 | 1 | 1 |
| PTPRC_MRC1 | 1 | | 1 | 1 | 1 |
| PTPRD_IL1RAP | 1 | | 1 | 1 | 1 |
| PTPRD_IL1RAPL1 | 1 | | 1 | 1 | 1 |
| REN_ATP6AP2 | 1 | | 1 | 1 | 1 |
| RNASET2_TLR8 | 1 | | 1 | 1 | 1 |
| SIGLEC15_CD44 | 1 | | 1 | 0 | 0 |
| SPN_SIGLEC1 | 1 | | 1 | 1 | 1 |
| THPO_MPL | 1 | | 1 | 1 | 1 |
| CD177_PECAM1 | 1 | | 1 | 1 | 1 |

**Supplementary Table 16** Primary MAIT cell signature gene set for TCGA analysis

| TRBV6-4 | TRAV1-2 | SLC4A10 | RORC | TRGV2 | LST1 | IL4I1 |
| --- | --- | --- | --- | --- | --- | --- |
| CEBPD | TMIGD2 | DPP4 | CXCR6 | LINC00910 | NCR3 | ZBTB16 |
| TEX14 | LINC01871 | CCR6 | JAML | KLRB1 | PDE4D | AQP3 |
| TNF | PRR5 | GPR65 | IER3 | PFKFB3 | LTB | GYG1 |
| SLAMF1 | AC007952.4 | TNFRSF25 | PERP | CISH | CD8A | PLCB1 |
| ITM2C | SLC7A5 | KLRG1 | IFNGR1 | SYTL2 | CERK | ERN1 |
| FKBP11 | RORA | PHACTR2 | ADRB2 | PHLDA1 | NFKBIZ | OXNAD1 |
| PNP | CCL3L1 | COL6A2 | GSTM1 | HLA-DRB1 | GNLY | TRAV9-2 |
| PTTG1IP | PRDX1 | PECAM1 | HLA-DQB1 | HLA-DPA1 | HLA-DPB1 | ATF3 |
| PSPH | NRARP | PEBP1 | CD63 | SGK1 | LINC02446 | CSTB |
| GPX4 | ANXA2 | NDUFB9 | CD74 | PRDX6 | CHCHD10 | TXN |
| TYROBP | ANAPC11 | RHOB | TALDO1 | PHB | PSAP | ME1 |
| CTSD | FTL | NDUFS2 | IER3 | NAPRT | HDAC9 | AC009313.1 |
| COA8 | PSMD4 | LINC00892 | DUSP6 | MTDH | SQSTM1 | TXK |
| LAIR1 | NDUFC2 | AC022217.3 | NME2 | AL021155.5 | AL691403.1 | S100A10 |
| SEPTIN11 | MARCKSL1 | CAPG | GADD45G | SAT1 | CCL4L2 | AC012447.1 |
| COX5A | COX6C | GSTM2 | CD8B | NCF4 | AC245014.3 | FOS |
| AC087239.1 |  |  |  |  |  |  |

**Supplementary Table 17** Relapsed MAIT cell signature gene set for TCGA analysis

| SLC4A10 | TRAV1-2 | TMIGD2 | NCR3 | ZBTB16 | CCL20 | KLRB1 |
| --- | --- | --- | --- | --- | --- | --- |
| GPR35 | IL4I1 | KLRG1 | LINC01871 | PPP1R14B | JAML | PMEPA1 |
| IFNGR1 | GCHFR | SLC7A5 | AQP3 | RUNX2 | ITM2C | TC2N |
| PRR5 | GYG1 | AC006369.1 | PLCB1 | GPR65 | SATB1 | PFKFB3 |
| SPOCK2 | ERN1 | AUTS2 | CTSA | ODF2L | PERP | SYTL2 |
| ZC3H12A | CCR6 | CXCR6 | CD8A | PDE4D | LAG3 | MYBL1 |
| FKBP11 | IL7R | IER5L | SNHG16 | CAMK4 | TTC39C | G3BP2 |
| LTB | NXPH4 | PMEPA1 | DUSP4 | METRNL | TNFSF13B | TRBV6-1 |
| AHI1 | CCNG2 | RPL13A | HIBCH | ATP8A1 | FAM118A | NINJ1 |
| WNT1 | AUTS2 | LDLRAD4 | PDE3B | GPR35 | LDHA | CENPN |
| SPOCK2 | GCHFR | NXT1 | CXCR4 | PRR7 | AVPI1 | HLA-C |
| GOLGA8A | PPP1R14B | TRAF4 | BIRC3 | PDCD4 | NCF1 | RALGAPA1 |
| RPS10 | ZBTB1 | PPP1R2 | TUBA4A | YIPF5 | OCIAD2 | PIM3 |
| SLC7A5 | CD55 | UBE2B | CNOT6L | REL | MXD4 | CAMK4 |
| TC2N | TGIF1 | SKIL | ITM2C | P2RY8 | ITM2A | SNHG16 |
| CCL20 | GAS5 | TIPARP | JMJD6 | RGCC | MED30 | ERN1 |
| FAM177A1 | PDE4B | RHOF | PLP2 | EMD | DNAJB6 | TM2D3 |
| CHD1 |  |  |  |  |  |  |
